# Supplementary material
Source: PubMed Central journal article supplement (PMC8372205)
Supplement: MD-012-D0MD00372G-s001.pdf [file MD-012-D0MD00372G-s001.pdf]

## Supplementary Data

# Design, Synthesis and Biological Evaluation of Combretastatin A-4 Sulfamate Derivatives as Potential Anti-Cancer Agents

Leilei Huang<sup>a</sup>, Jinwen Huang<sup>a,b,c\*</sup>, Hui Nie<sup>a</sup>, Yingzi Li<sup>a</sup>, Lixing Song<sup>a</sup> and Fanhong Wu<sup>a,b\*</sup>

<sup>a</sup> *Department of Pharmaceutical Engineering, School of Chemical and Environmental Engineering, Shanghai Institute of Technology, Shanghai, China*

<sup>b</sup> *Shanghai Engineering Research Center of Green Fluoropharmaceutical Technology, Shanghai, China*

<sup>c</sup> *Key Laboratory of Organofluorine Chemistry, Shanghai Institute of Organic Chemistry, CAS, China*

\* *Corresponding authors.*

*E-mail address: (J. W. H.) email: goldven@sit.edu.cn; (F. H. W.) email: wfh@sit.edu.cn.*

---

| <b>Table of Contents</b>                                                                             | <b>Page</b> |
|------------------------------------------------------------------------------------------------------|-------------|
| Experimental Section                                                                                 | S3-S10      |
| Structure activity relationship discussion on arylsulfatase and tubulin polymerization inhibition    | S10         |
| HPLC purity data for Compounds <b>16a-16j</b> , <b>17a-17d</b> , <b>19a</b> , <b>19b</b> , <b>20</b> | S11         |
| Selected <sup>1</sup> H, <sup>19</sup> F and <sup>13</sup> C NMR Spectra                             | S12-S113    |
| Selected HRMS and HPLC Spectra                                                                       |             |
| The antiproliferation effect of <b>16a,16i</b> and <b>CA-4</b> on six tumor cells                    | S113-S114   |

---

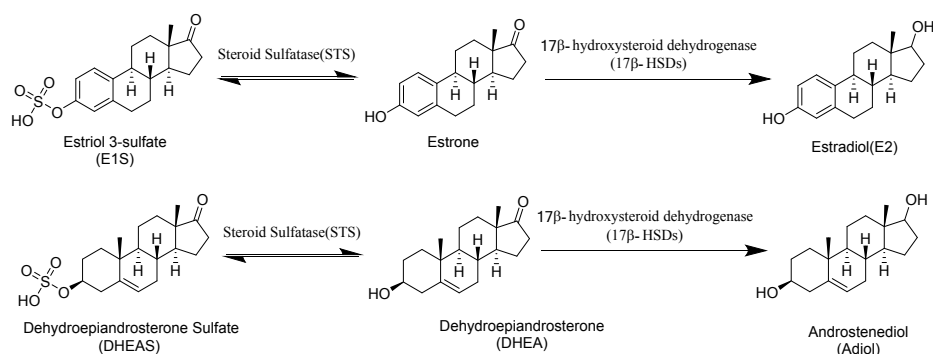

Scheme 1. The role of steroid sulfatase in hormone regulation.

## Experimental Section

**Chemistry (general information).** All solvents, starting materials and reagents were purchased from Tansoole and used directly without further purification. The reaction was monitored by thin layer chromatography (TLC) using a 0.25 mm pre-coated silica gel plate, and visualized under UV light. The products were purified by flash column chromatography on silica gel, structure characterization and purity assessment were judged by NMR, HRMS and HPLC. Nuclear magnetic resonance (NMR) spectra were collected on a Bruker 500 MHz spectrometer and analysed by MestReNova using residual solvent proton and carbon peaks as reference. High resolution mass spectrometry (HRMS) was recorded on a Waters GCT Premier mass spectrometer. The chemical name was automatically generated using ChemBioDraw Ultra 14.0.

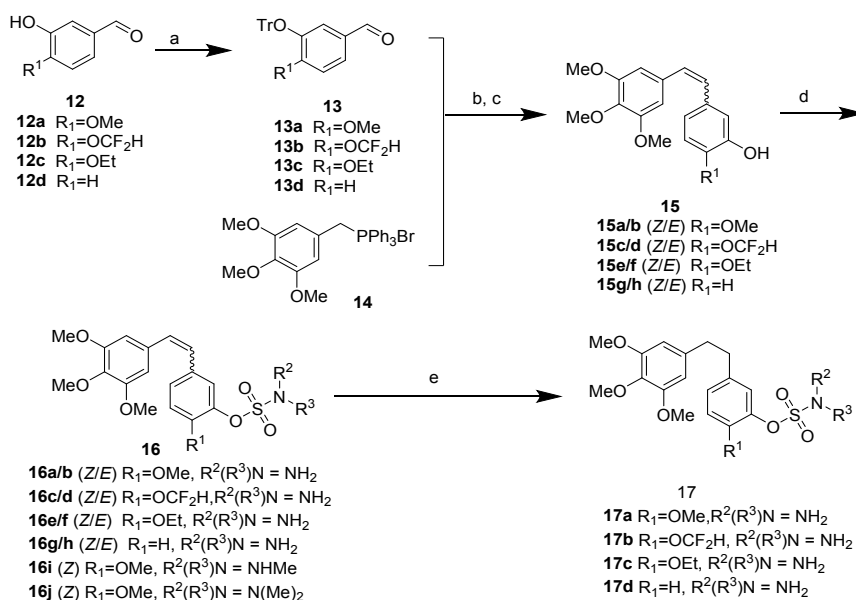

**Scheme 2 .** Synthetic Route of Combretastatin A-4 sulfamate Derivatives. Reagent and conditions: a)  $\text{Ph}_3\text{CCl}(\text{TrCl})$ , THF,  $\text{Et}_3\text{N}$ , rt, 2h; b) *n*-BuLi, THF,  $-78^\circ\text{C}$ , 30mins, then added 13/THF solution,  $-78^\circ\text{C}$  to RT, overnight; c) 37% HCl (aq.), toluene, rt, 2h; d) NaH, DMF,  $\text{RSO}_2\text{Cl}$  ( $R = \text{NH}_2, \text{NHMe}, \text{N}(\text{Me})_2$ ),  $0^\circ\text{C}$  to RT, overnight; e)  $\text{H}_2$  (1 atm), 10% Pd/C, EtOH, rt, 3h.

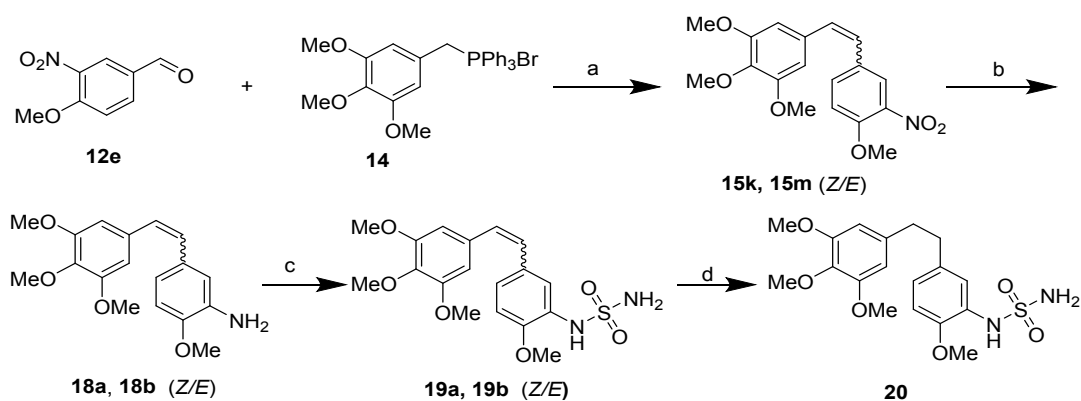

**Scheme 3.** Synthetic Route of Combretastatin Sulfamide Derivatives. Reagent and conditions: a) *n*-BuLi, THF,  $-78^{\circ}\text{C}$ , 30mins, then added **12e**/THF solution,  $-78^{\circ}\text{C}$ -rt, overnight; b) Zn,  $\text{CH}_3\text{COOH}$ , 2h, rt; c) NaH, DMF,  $\text{NH}_2\text{SO}_2\text{Cl}$ ,  $0^{\circ}\text{C}$ -rt, overnight; d)  $\text{H}_2$  (1 atm), 10% Pd/C, EtOH, rt, 3h.

**General synthesis procedures for Compounds 13** *Representative example:* To a solution of the compound **12a** (5.00 g, 32.9 mmol) and trityl chloride (11.00 g, 39.5 mmol) in dry tetrahydrofuran (THF, 20 mL), triethylamine (0.5 mL) was added dropwise, the reaction was stirred for about 2 hours at room temperature until TLC indicated the reaction was completed. Water was added to quench the reaction, extracted with ethyl acetate, the combined organic phase was dried over anhydrous sodium sulfate, filtered and concentrated, the residue was recrystallized in a solvent mixture of ethyl acetate and petroleum ether (1/2, v/v) to give the desired compound **13a** (11.20 g).

4-methoxy-3-(trityloxy)benzaldehyde (**13a**): solid, mp  $123\text{-}124^{\circ}\text{C}$ , yield 86%;  $^1\text{H}$  NMR (500 MHz,  $\text{CDCl}_3$ ):  $\delta$  9.57 (s, 1H), 7.46 (d,  $J = 7.6$  Hz, 1H), 7.44-7.22 (m, 15H), 6.98 (d,  $J = 7.6$  Hz, 1H), 6.77 (d,  $J = 7.6$  Hz, 1H), 3.68 (s, 3H);  $^{13}\text{C}$  NMR (125 MHz,  $\text{CDCl}_3$ )  $\delta$  190.8, 158.0, 147.0, 146.3, 145.8, 143.8, 130.6, 129.1, 128.9, 128.0, 127.9, 127.6, 127.4, 127.2, 126.7, 124.6, 122.9, 114.2, 111.1, 110.3, 92.0, 55.7; HR-MS:  $m/z$  calcd. for  $\text{C}_{27}\text{H}_{22}\text{O}_3$ : 394.1569, found 394.1567( $\text{M}^+$ ).

4-(difluoromethoxy)-3-(trityloxy)benzaldehyde (**13b**): solid,  $147\text{-}148^{\circ}\text{C}$ , yield 85%;  $^1\text{H}$  NMR (500 MHz,  $\text{CDCl}_3$ ):  $\delta$  9.92 (s, 1H), 7.54 (s, 1H), 7.45 (d,  $J = 8.1$  Hz, 2H), 7.29 (m, 15H), 6.64 (t,  $J = 72.5$ , 1H,  $\text{OCF}_2\text{H}$ );  $^{19}\text{F}$  NMR (470 MHz,  $\text{CDCl}_3$ ):  $\delta$  -81.04 (s), -81.26 (s);  $^{13}\text{C}$  NMR (125 MHz,  $\text{CDCl}_3$ ):  $\delta$  146.9, 143.4, 143.2, 128.8, 128.4, 128.0, 128.0, 127.8, 127.3, 121.4 (t,  $J = 194.0$ ,  $\text{OCF}_2\text{H}$ ), 82.1; HR-MS:  $m/z$  calcd. for  $\text{C}_{27}\text{H}_{20}\text{F}_2\text{O}_3$ : 430.1380, found: 430.1382( $\text{M}^+$ ).

4-ethoxy-3-(trityloxy)benzaldehyde (**13c**): solid,  $141\text{-}142^{\circ}\text{C}$ , yield 88%;  $^1\text{H}$  NMR (500 MHz,  $\text{CDCl}_3$ ):  $\delta$  9.60 (s, 1H), 7.51 (d,  $J = 6.7$  Hz, 6H), 7.40 (dd,  $J = 8.3, 1.7$  Hz, 1H), 7.35-7.20 (m, 9H), 7.19 (s, 1H), 6.72 (d,  $J = 8.4$  Hz, 1H), 3.84 (q,  $J = 6.9$  Hz, 2H), 1.36 (t,  $J = 7.0$  Hz, 3H);  $^{13}\text{C}$  NMR (125 MHz,  $\text{CDCl}_3$ )  $\delta$  190.9, 157.9, 146.0, 144.0, 129.4, 129.0, 127.6, 127.5, 127.0, 123.8, 111.8, 92.3, 64.2, 14.6; HR-MS:  $m/z$  calcd. for  $\text{C}_{28}\text{H}_{24}\text{O}_3$ : 408.1725, found: 408.1722( $\text{M}^+$ ).

3-(trityloxy)benzaldehyde (**13d**): solid,  $104\text{-}145^{\circ}\text{C}$ , yield 90%;  $^1\text{H}$  NMR (500 MHz,  $\text{CDCl}_3$ ):  $\delta$  9.74 (s, 1H), 7.36-7.27 (m, 15H), 7.24 (d,  $J = 7.1$  Hz, 1H), 7.20 (s, 1H), 7.15 (t,  $J = 7.8$  Hz, 1H), 6.98 (dd,  $J = 8.1, 1.4$  Hz, 1H);  $^{13}\text{C}$  NMR (125 MHz,  $\text{CDCl}_3$ ):  $\delta$  192.1, 157.1, 147.0, 143.7, 137.0, 129.1, 129.0, 128.1, 128.0, 127.5, 127.4, 127.2, 123.0, 121.8, 91.3; HR-MS:  $m/z$  calcd for  $\text{C}_{26}\text{H}_{20}\text{O}_2$ , 364.1463, found: 364.1465( $\text{M}^+$ ).

**General synthesis procedures for Compounds 15** *Representative example:* To a pre-cooled ( $-78^{\circ}\text{C}$ ) suspension of compound **14** (13.28 g, 25.4 mmol) in dry THF (200 mL) under nitrogen protection, was slowly dropped *n*-butyl lithium cyclohexane solution (1.6 M), the reaction was stirred for 1 hour. Then a solution of compound **13a** (10.00 g, 35.4 mmol) in dry THF (20 mL) was added dropwise to the reaction. Warmed to room temperature and stirred overnight. The solution was poured into ice water, and extracted

with ethyl acetate. The combined organic phase was concentrated *in vacuum*, the residue was redissolved in toluene (80 mL), 37 % HCl (20 mL) was added dropwise, and the solution was stirred for 2h at room temperature until TLC indicated the reaction was completed. Washed with water, the organic phase was dried over anhydrous sodium sulfate, filtered, the filtrate was concentrated *in vacuum*, the residue was purified by flash column chromatography on silica gel (Ethyl acetate-petroleum ether, 3:1) to give the desired compounds **15a** (2.63 g, 33 %) and **15b** (2.38 g).

(*Z*)-2-methoxy-5-(3,4,5-trimethoxystyryl)phenol (**15a**): oil, yield 33%; <sup>1</sup>H NMR (500 MHz, CDCl<sub>3</sub>): δ 6.90 (d, *J* = 1.5 Hz, 1H), 6.77 (dd, *J* = 8.3, 1.4 Hz, 1H), 6.71 (d, *J* = 8.3 Hz, 1H), 6.51 (s, 2H), 6.44 (d, *J* = 12.0 Hz, 1H), 6.39 (d, *J* = 12.0 Hz, 1H), 5.59 (brs, 1H, OH), 3.82 (d, *J* = 2.4 Hz, 6H), 3.67 (s, 6H); <sup>13</sup>C NMR (125 MHz, CDCl<sub>3</sub>): δ 152.9, 147.0, 145.9, 145.3, 132.8, 130.7, 129.6, 129.1, 128.0, 127.3, 121.2, 115.2, 110.5, 106.2, 61.0, 56.0; HR-MS: *m/z* calcd. for C<sub>18</sub>H<sub>20</sub>O<sub>5</sub>: 316.1311, found: 316.1315(M<sup>+</sup>).

(*E*)-2-methoxy-5-(3,4,5-trimethoxystyryl)phenol (**15b**): solid, mp 106-107 °C, yield 30%; <sup>1</sup>H NMR (500 MHz, CDCl<sub>3</sub>): δ 7.14 (d, *J* = 1.7 Hz, 1H), 6.97 (d, *J* = 8.3 Hz, 1H), 6.92 (d, *J* = 16.0 Hz, 1H), 6.88 (d, *J* = 16.0 Hz, 1H), 6.84 (d, *J* = 8.3 Hz, 1H), 6.71 (s, 2H), 5.61 (brs, 1H, OH), 3.92 (s, 9H), 3.86 (s, 3H); <sup>13</sup>C NMR (125 MHz, CDCl<sub>3</sub>): δ 153.2, 147.2, 146.1, 145.6, 133.0, 131.0, 129.8, 129.4, 128.3, 127.6, 121.4, 115.4, 110.7, 106.5, 61.2, 56.3; HR-MS: *m/z* calcd. for C<sub>18</sub>H<sub>20</sub>O<sub>5</sub>: 316.1311, found: 316.1310(M<sup>+</sup>).

(*Z*)-2-(difluoromethoxy)-5-(3,4,5-trimethoxystyryl)phenol (**15c**): oil, yield 35%; <sup>1</sup>H NMR (500 MHz, CDCl<sub>3</sub>): δ 6.99 (d, *J* = 8.3 Hz, 1H), 6.94 (d, *J* = 1.4 Hz, 1H), 6.78 (dd, *J* = 8.3, 1.4 Hz, 1H), 6.58 (d, *J* = 12.0 Hz, 2H), 6.48 (d, *J* = 12.0 Hz, 2H), 6.40 (t, *J* = 74.0 Hz, 1H, OCF<sub>2</sub>H), 6.09 (brs, 1H, OH), 3.80 (s, 3H), 3.64 (s, 6H); <sup>19</sup>F NMR (470 MHz, CDCl<sub>3</sub>): δ -81.09 (s); <sup>13</sup>C NMR (125 MHz, CDCl<sub>3</sub>): δ 152.9, 147.6, 137.3, 137.0, 136.3, 132.2, 130.7, 128.7, 121.3, 120.5, 118.2, 117.3, 116.1 (t, *J* = 260.0 Hz, OCF<sub>2</sub>H), 106.2, 60.9, 55.9; HR-MS: *m/z* calcd. for C<sub>18</sub>H<sub>18</sub>F<sub>2</sub>O<sub>5</sub>: 352.1122, found: 352.1125(M<sup>+</sup>).

(*E*)-2-(difluoromethoxy)-5-(3,4,5-trimethoxystyryl)phenol (**15d**): solid, mp 121-122 °C, yield 37%; <sup>1</sup>H NMR (500 MHz, CDCl<sub>3</sub>): δ 7.17 (s, 1H), 7.09 (d, *J* = 8.3 Hz, 1H), 7.00 (d, *J* = 8.0 Hz, 1H), 6.97 (d, *J* = 16.0 Hz, 1H), 6.90 (d, *J* = 16.0 Hz, 1H), 6.72 (s, 2H), 6.54 (t, *J* = 74.0 Hz, 1H, OCF<sub>2</sub>H), 5.72 (brs, 1H, OH), 3.91 (s, 6H), 3.87 (s, 3H); <sup>19</sup>F NMR (470 MHz, CDCl<sub>3</sub>): δ -80.27 (s); <sup>13</sup>C NMR (125 MHz, CDCl<sub>3</sub>): δ 153.5, 147.8, 136.4, 132.9, 129.5, 127.0, 120.3, 119.2, 118.5, 114.3 (t, *J* = 260.0 Hz, OCF<sub>2</sub>H), 103.9, 61.1, 56.3; HR-MS: *m/z* calcd. for C<sub>18</sub>H<sub>18</sub>F<sub>2</sub>O<sub>5</sub>: 352.1122, found: 352.1126(M<sup>+</sup>).

(*Z*)-2-ethoxy-5-(3,4,5-trimethoxystyryl)phenol (**15e**): oil, yield 38%; <sup>1</sup>H NMR (500 MHz, CDCl<sub>3</sub>): δ 6.93 (d, *J* = 1.1 Hz, 1H), 6.78 (dd, *J* = 8.5, 0.9 Hz, 1H), 6.72 (d, *J* = 8.2 Hz, 1H), 6.53 (s, 2H), 6.47 (d, *J* = 12.0 Hz, 1H), 6.41 (d, *J* = 12.0 Hz, 1H), 5.58 (brs, 1H, OH), 4.09 (q, *J* = 7.0 Hz, 2H), 3.84 (s, 3H), 3.70 (s, 6H), 1.43 (t, *J* = 7.0 Hz, 3H); <sup>13</sup>C NMR (125 MHz, CDCl<sub>3</sub>): δ 191.2, 152.9, 151.4, 146.3, 130.5, 129.7, 129.0, 124.7, 121.2, 115.1, 114.1, 111.4, 111.0, 106.1, 64.9, 56.0; HR-MS *m/z* ESI-HRMS: *m/z* calcd. for C<sub>19</sub>H<sub>22</sub>O<sub>5</sub>: 330.1467, found: 330.1471(M<sup>+</sup>).

(*E*)-2-ethoxy-5-(3,4,5-trimethoxystyryl)phenol (**15f**): solid, mp 117-118 °C, yield 40%; <sup>1</sup>H NMR (500 MHz, CDCl<sub>3</sub>): δ 6.92 (d, *J* = 1.1 Hz, 1H), 6.78 (d, *J* = 9.0 Hz, 1H), 6.72 (d, *J* = 8.2 Hz, 1H), 6.53 (s, 2H), 6.46 (d, *J* = 16.0 Hz, 1H), 6.41 (d, *J* = 16.0 Hz, 1H), 5.59 (brs, 1H, OH), 4.12 (q, *J* = 7.0 Hz, 2H), 3.84 (s, 3H), 3.70 (s, 6H), 1.26 (t, *J* = 7.0 Hz, 3H); <sup>13</sup>C NMR (125 MHz, CDCl<sub>3</sub>): δ 191.2, 152.9, 151.4, 146.3, 130.5, 129.6, 129.0, 124.7, 121.2, 115.1, 114.1, 111.4, 111.0, 106.2, 65.0, 56.0; HR-MS: *m/z* calcd. for C<sub>19</sub>H<sub>22</sub>O<sub>5</sub>: 330.1467, found: 330.1470(M<sup>+</sup>).

(*Z*)-3-(3,4,5-trimethoxystyryl)phenol (**15g**): oil, yield 36%; <sup>1</sup>H NMR (500 MHz, CDCl<sub>3</sub>): δ 7.02 (t, *J* = 8.0 Hz, 1H), 6.84 (brs, 1H, OH), 6.75 (d, *J* = 7.4 Hz, 2H), 6.66-6.43 (m, 3H), 6.42 (s, 1H), 6.37 (d, *J* = 12.0 Hz, 1H), 3.74 (s, 3H), 3.55 (s, 6H); <sup>13</sup>C NMR (125 MHz, CDCl<sub>3</sub>): δ 156.1, 152.6, 138.8, 132.6, 130.2, 130.0, 129.8, 129.4, 120.9, 115.6, 114.3, 106.3, 60.8, 55.8; HR-MS: *m/z* calcd. for C<sub>17</sub>H<sub>18</sub>O<sub>4</sub>: 286.1205, found: 286.1206(M<sup>+</sup>).

(*E*)-3-(3,4,5-trimethoxystyryl)phenol (**15h**): solid, mp 91-93 °C, yield 38%; <sup>1</sup>H NMR (500 MHz, CDCl<sub>3</sub>): δ 7.20 (t, *J* = 7.8 Hz, 1H), 7.07-7.00 (m, 2H), 6.96 (d, *J* = 16.0 Hz, 1H), 6.92 (d, *J* = 16.0 Hz, 1H), 6.79 (d, *J* = 7.9 Hz, 1H), 6.71 (s, 2H), 3.89 (d, *J* = 3.5 Hz, 9H); <sup>13</sup>C NMR (125 MHz, CDCl<sub>3</sub>): δ 156.4, 153.3, 138.8, 137.6, 133.3, 129.8, 128.7, 128.1, 118.9, 114.9, 113.1, 103.7, 61.0, 56.1; HR-MS: *m/z* calcd for C<sub>17</sub>H<sub>18</sub>O<sub>4</sub>: 286.1205, found: 286.1206(M<sup>+</sup>).

**General synthesis procedures for Compounds 16a-16j**, **19a** and **19j** *Representative example*: To a ice-bath cooled solution of **15a** (1.00 g, 3.2 mmol) in dry N, N-dimethylformamide (DMF, 8 mL) was added sodium hydride (0.15 g, 6.3 mmol), after stirred at 0 °C for 1 hour, a solution of amino-type sulfonyl chloride (0.82 g, 6.3 mmol) in DMF (5 mL) was added dropwise, then the reaction was warmed to room temperature and stirred overnight. The reaction was quenched with water, extracted with ethyl acetate, the combined organic layer was washed with brine and water, dried over anhydrous sodium sulfate, filtered, concentrated *in vacuum*, the residue was purified by flash column chromatography on silica gel (elute with ethyl acetate/petroleum ether, 3:1, v/v) to obtain the desired compound **16a** (0.77 g) .

(*Z*)-2-methoxy-5-(3,4,5-trimethoxystyryl)phenyl sulfamate (**16a**): solid, mp 116-117 °C, yield 62%; <sup>1</sup>H NMR (500 MHz, CDCl<sub>3</sub>): δ 7.21 (s, 1H), 7.15 (d, *J* = 8.5 Hz, 1H), 6.85 (d, *J* = 8.5 Hz, 1H), 6.48 (d, *J* = 12.1 Hz, 1H), 6.43 (d, *J* = 12.1 Hz, 3H), 5.29 (s, 2H), 3.82 (d, *J* = 13.8 Hz, 6H), 3.68 (s, 6H); <sup>13</sup>C NMR (125 MHz, CDCl<sub>3</sub>): δ 153.1, 150.8, 138.9, 137.4, 132.5, 130.6, 130.3, 128.8, 128.3, 124.3, 112.8, 106.2, 61.0, 56.3, 56.1; HR-MS: *m/z* calcd. for C<sub>18</sub>H<sub>21</sub>NO<sub>7</sub>S: 395.1039, found:395.1040(M<sup>+</sup>).

(*E*)-2-methoxy-5-(3,4,5-trimethoxystyryl)phenyl sulfamate (**16b**): solid, mp 169-171 °C, yield 60%; <sup>1</sup>H NMR (500 MHz, DMSO-*d*<sub>6</sub>): δ 7.95 (s, 2H), 7.54 (s, 1H), 7.48 (d, *J* = 8.5 Hz, 1H), 7.19 (d, *J* = 16.0 Hz, 1H), 7.17 (s, 1H), 7.14 (d, *J* = 16.0 Hz, 1H), 6.91 (s, 2H), 3.83 (s, 9H), 3.67 (s, 3H); <sup>13</sup>C NMR (125 MHz, DMSO-*d*<sub>6</sub>): δ 153.1, 151.2, 139.2, 137.3, 132.8, 130.1, 127.4, 126.7, 125.4, 120.7, 113.6, 103.8, 60.1, 56.0, 55.9; HR-MS: *m/z* calcd. for C<sub>18</sub>H<sub>21</sub>NO<sub>7</sub>S: 395.1039, found: 395.1041(M<sup>+</sup>).

(*Z*)-2-(difluoromethoxy)-5-(3,4,5-trimethoxystyryl)phenyl sulfamate (**16c**): solid, mp 161-163 °C, yield 63%; <sup>1</sup>H NMR (500 MHz, DMSO-*d*<sub>6</sub>): δ 8.50 (s, 2H), 7.05 (d, *J* = 8.2 Hz, 1H), 7.01 (t, *J* = 75 Hz, OCF<sub>2</sub>H, 1H), 6.92 (s, 1H), 6.72 (dd, *J* = 8.2, 1.4 Hz, 1H), 6.54 (s, 2H), 6.52 (d, *J* = 12.0 Hz, 1H), 6.49 (d, *J* = 12.0 Hz, 1H), 3.64 (s, 3H), 3.58 (s, 6H); <sup>19</sup>F NMR (470 MHz, DMSO-*d*<sub>6</sub>) δ -81.38 (s); <sup>13</sup>C NMR (125 MHz, DMSO-*d*<sub>6</sub>): δ 152.6, 148.6, 137.5, 136.9, 135.5, 131.7, 130.1, 128.7, 121.7, 119.9, 116.9, 116.6 (t, *J* = 262.5 Hz, OCF<sub>2</sub>H), 106.2, 60.1, 55.5; HR-MS: *m/z* calcd for C<sub>18</sub>H<sub>19</sub>F<sub>2</sub>NO<sub>7</sub>S: 431.0850, found: 431.0849(M<sup>+</sup>).

(*E*)-2-(difluoromethoxy)-5-(3,4,5-trimethoxystyryl)phenyl sulfamate (**16d**): solid, mp 146-148 °C, yield 65%; <sup>1</sup>H NMR (500 MHz, DMSO-*d*<sub>6</sub>): δ 8.27 (s, 2H), 7.68 (s, 1H), 7.57 (d, *J* = 8.4 Hz, 1H), 7.35 (d, *J* = 8.4 Hz, 1H), 7.27 (d, *J* = 16.0 Hz, 1H), 7.18 (d, *J* = 16.0 Hz, 1H), 7.09 (t, *J* = 75 Hz, OCF<sub>2</sub>H, 1H), 6.95 (s, 2H), 3.84 (s, 6H), 3.68 (s, 3H); <sup>19</sup>F NMR (470 MHz, DMSO-*d*<sub>6</sub>): δ -81.33 (s); <sup>13</sup>C NMR (125 MHz, DMSO-*d*<sub>6</sub>): δ 153.2, 142.2, 141.2, 137.6, 135.6, 132.4, 129.9, 125.9, 125.1, 121.3, 120.9, 116.5 (t, *J* = 262.5 Hz, OCF<sub>2</sub>H), 104.1, 60.1, 56.0; HR-MS: *m/z* calcd. for C<sub>18</sub>H<sub>19</sub>F<sub>2</sub>NO<sub>7</sub>S: 431.0850, found: 431.0848(M<sup>+</sup>).

(*Z*)-2-ethoxy-5-(3,4,5-trimethoxystyryl)phenyl sulfamate (**16e**): solid, mp 153-155 °C, yield 66%; <sup>1</sup>H NMR (500 MHz, CDCl<sub>3</sub>): δ 7.21 (s, 1H), 7.14 (d, *J* = 8.6 Hz, 1H), 6.86 (d, *J* = 8.5 Hz, 1H), 6.49 (d, *J* = 12.0 Hz, 1H), 6.44 (d, *J* = 12.0 Hz, 3H), 5.15 (s, 2H), 4.10 (q, *J* = 6.9 Hz, 2H), 3.82 (s, 3H), 3.69 (s, 6H), 1.43 (t, *J* = 6.9 Hz, 3H); <sup>13</sup>C NMR (125 MHz, CDCl<sub>3</sub>): δ 153.1, 150.0, 139.2, 137.5, 132.5, 130.7, 130.3, 128.8, 128.3, 124.5, 113.8, 106.2, 65.0, 61.1, 56.2, 14.8; HR-MS: *m/z* calcd. for C<sub>19</sub>H<sub>23</sub>NO<sub>7</sub>S: 409.1195, found: 409.1193(M<sup>+</sup>).

(*E*)-2-ethoxy-5-(3,4,5-trimethoxystyryl)phenyl sulfamate (**16f**): solid, mp 172-174 °C, yield 70%; <sup>1</sup>H NMR (500 MHz, CDCl<sub>3</sub>): δ 7.18 (s, 1H), 7.11 (d, *J* = 8.6 Hz, 1H), 6.96 (d, *J* = 8.5 Hz, 1H), 6.63 (d, *J* = 16.0 Hz,

1H), 6.58 (d,  $J = 16.0$  Hz, 3H), 5.18 (s, 2H), 4.21 (q,  $J = 6.9$  Hz, 2H), 3.93 (s, 3H), 3.71 (s, 6H), 1.48 (t,  $J = 6.9$  Hz, 3H);  $^{13}\text{C}$  NMR (125 MHz,  $\text{CDCl}_3$ ):  $\delta$  153.4, 150.3, 139.4, 137.8, 132.8, 130.9, 130.6, 129.1, 128.6, 124.8, 114.1, 106.5, 65.3, 61.3, 56.4, 15.1; HR-MS:  $m/z$  calcd for  $\text{C}_{19}\text{H}_{23}\text{NO}_7\text{S}$ , 409.1195, found: 409.1194( $\text{M}^+$ ).

(*Z*)-3-(3,4,5-trimethoxystyryl)phenyl sulfamate (**16g**): solid, mp 108-110 °C, yield 68%;  $^1\text{H}$  NMR (500 MHz,  $\text{CDCl}_3$ ):  $\delta$  7.28 (s, 1H), 7.20 (d,  $J = 7.6$  Hz, 1H), 7.15 (s, 1H), 7.12 (d,  $J = 8.0$  Hz, 1H), 6.55 (d,  $J = 12.0$  Hz, 1H), 6.52 (d,  $J = 12.0$  Hz, 1H), 6.40 (s, 2H), 5.36 (s, 2H), 3.77 (s, 3H), 3.63 (s, 6H);  $^{13}\text{C}$  NMR (125 MHz,  $\text{CDCl}_3$ ):  $\delta$  152.9, 150.1, 139.4, 137.3, 132.3, 131.6, 130.7, 129.7, 128.7, 128.5, 127.8, 122.8, 122.3, 120.9, 106.4, 61.0, 56.1; HR-MS:  $m/z$  calcd. for  $\text{C}_{17}\text{H}_{19}\text{NO}_6\text{S}$ : 365.0933, found: 365.0936( $\text{M}^+$ ).

(*E*)-3-(3,4,5-trimethoxystyryl)phenyl sulfamate (**16h**): solid, mp 136-138 °C, yield 67%;  $^1\text{H}$  NMR (500 MHz,  $\text{CDCl}_3$ ):  $\delta$  7.43 (s, 1H), 7.40 (s, 1H), 7.36 (s, 1H), 7.20 (d,  $J = 7.5$  Hz, 1H), 7.00 (d,  $J = 16.0$  Hz, 1H), 6.91 (d,  $J = 16.0$  Hz, 1H), 6.69 (s, 2H), 5.28 (s, 2H), 3.87 (s, 6H), 3.85 (s, 3H);  $^{13}\text{C}$  NMR (125 MHz,  $\text{CDCl}_3$ ):  $\delta$  153.5, 150.7, 139.6, 138.4, 132.6, 130.5, 130.2, 126.7, 125.4, 121.0, 119.7, 104.0, 61.1, 56.23; HR-MS:  $m/z$  calcd. for  $\text{C}_{17}\text{H}_{19}\text{NO}_6\text{S}$ : 365.0933, found: 365.0936( $\text{M}^+$ ).

(*Z*)-2-methoxy-5-(3,4,5-trimethoxystyryl)phenyl methylsulfamate (**16i**): solid, mp 120-122 °C, yield 62%;  $^1\text{H}$  NMR (500 MHz,  $\text{CDCl}_3$ ):  $\delta$  7.16 (s, 2H), 6.87 (d,  $J = 9.0$  Hz, 1H), 6.51 (d,  $J = 12.0$  Hz, 1H), 6.47 (d,  $J = 12.0$  Hz, 3H), 3.85 (s, 3H), 3.81 (s, 3H), 3.71 (s, 6H), 2.82 (d,  $J = 5.2$  Hz, 3H);  $^{13}\text{C}$  NMR (125 MHz,  $\text{CDCl}_3$ ):  $\delta$  152.9, 145.9, 145.3, 137.2, 132.9, 130.7, 129.7, 129.1, 121.3, 115.2, 110.5, 106.2, 61.0, 56.1, 56.1; HR-MS:  $m/z$  calcd for  $\text{C}_{19}\text{H}_{23}\text{NO}_7\text{S}$ : 409.1195, found: 409.1196( $\text{M}^+$ ).

(*Z*)-2-methoxy-5-(3,4,5-trimethoxystyryl)phenyl dimethylsulfamate (**16j**): solid, mp 103-105 °C, yield 61%;  $^1\text{H}$  NMR (500 MHz,  $\text{CDCl}_3$ ):  $\delta$  7.21 (s, 1H), 7.10 (s, 1H), 6.82 (d,  $J = 7.8$  Hz, 1H), 6.42 (d,  $J = 12.0$  Hz, 1H), 6.44 (s, 1H), 6.46 (d,  $J = 12.0$  Hz, 1H), 6.47 (s, 1H), 3.85 (s, 3H), 3.82 (s, 3H), 3.67 (s, 3H), 3.64 (s, 3H), 2.88 (s, 3H), 2.86 (s, 3H);  $^{13}\text{C}$  NMR (125 MHz,  $\text{CDCl}_3$ ):  $\delta$  153.1, 150.8, 139.0, 137.4, 132.5, 130.4, 130.1, 128.4, 124.0, 112.5, 105.9, 60.9, 56.1, 55.9, 38.6; HR-MS:  $m/z$  calcd. for  $\text{C}_{20}\text{H}_{25}\text{NO}_7\text{S}$ , 423.1354, found: 423.1352( $\text{M}^+$ ).

(*Z*)-3,4,5-trimethoxy-4'-methoxy-3'-amino sulfamate stibene (**19a**): solid, mp 143-145 °C, yield 64%;  $^1\text{H}$  NMR (500 MHz,  $\text{CDCl}_3$ ):  $\delta$  7.38 (d,  $J = 1.7$  Hz, 1H), 7.01 (dd,  $J = 8.4, 1.8$  Hz, 1H), 6.95 (s, 1H), 6.77 (d,  $J = 8.4$  Hz, 1H), 6.49 (d,  $J = 4.2$  Hz, 4H), 4.75 (s, 2H), 3.82 (d,  $J = 2.4$  Hz, 6H), 3.71 (s, 6H);  $^{13}\text{C}$  NMR (125 MHz,  $\text{CDCl}_3$ ):  $\delta$  153.1, 148.2, 137.5, 133.1, 130.4, 129.6, 129.5, 126.5, 125.5, 119.9, 110.4, 106.6, 61.1, 56.3, 56.0; HR-MS:  $m/z$  calcd for  $\text{C}_{18}\text{H}_{22}\text{N}_2\text{O}_6\text{S}$ : 394.1199, found: 394.1197( $\text{M}^+$ ).

(*E*)-3,4,5-trimethoxy-4'-methoxy-3'-amino sulfamate stibene (**19b**): solid, mp 159-161 °C, yield 69%;  $^1\text{H}$  NMR (500 MHz,  $\text{CDCl}_3$ ):  $\delta$  7.70 (s, 1H), 7.23 (d,  $J = 7.7$  Hz, 1H), 7.02 (s, 1H), 6.94 (s, 2H), 6.88 (d,  $J = 8.0$  Hz, 1H), 6.71 (s, 2H), 4.87 (s, 2H), 3.89 (d,  $J = 11.0$  Hz, 9H), 3.85 (s, 3H);  $^{13}\text{C}$  NMR (125 MHz,  $\text{CDCl}_3$ ):  $\delta$  153.5, 148.9, 133.2, 131.1, 127.9, 127.2, 126.9, 123.5, 117.9, 111.0, 103.6, 61.1, 56.3, 56.1; HR-MS:  $m/z$  calcd. for  $\text{C}_{18}\text{H}_{22}\text{N}_2\text{O}_6\text{S}$ : 394.1199, found: 394.1195( $\text{M}^+$ ).

**General synthesis procedures for Compounds 17a-17d and 20** *Representative example:* To a solution compound **16a** (0.50 g, 1.3 mmol) in absolute ethanol (10 mL), 10% Pd/C (0.12 g) was added, the reaction flask was vacuumed and recharged with hydrogen for three times, then stirred at room temperature for 3 hours until TLC indicated the hydrogenation reaction was completed. Filtered and concentrated to get the desired compound **17a** (0.38 g).

2-methoxy-5-(3,4,5-trimethoxyphenethyl)phenyl sulfamate (**17a**): solid, mp 131-132 °C, yield 76%;  $^1\text{H}$  NMR (500 MHz,  $\text{CDCl}_3$ ):  $\delta$  7.15 (s, 1H), 7.02 (d,  $J = 10.0$  Hz, 1H), 6.88 (d,  $J = 8.4$  Hz, 1H), 6.33 (s, 2H), 5.28 (s, 2H), 3.83 (s, 3H), 3.80 (s, 9H), 2.82 (dd,  $J = 8.0, 3.8$  Hz, 4H);  $^{13}\text{C}$  NMR (125 MHz,  $\text{CDCl}_3$ ):  $\delta$

153.1, 149.8, 138.9, 137.2, 136.3, 135.0, 128.0, 124.1, 113.1, 105.7, 60.9, 56.4, 56.2, 38.1, 36.9; HR-MS: m/z calcd for C<sub>18</sub>H<sub>23</sub>NO<sub>7</sub>S: 397.1195, found: 397.1196(M<sup>+</sup>).

2-(difluoromethoxy)-5-(3,4,5-trimethoxyphenethyl)phenyl sulfamate (**17b**): solid, mp 142-144 °C, yield 73%; <sup>1</sup>H NMR (500 MHz, DMSO-d<sub>6</sub>): δ 8.17 (s, 2H), 7.38 (d, *J* = 7.0 Hz, 1H), 7.22 (s, 2H), 7.15 (t, *J* = 7.5 Hz, 1H), 6.55 (s, 2H), 3.74 (s, 3H), 3.61 (s, 6H), 2.94-2.87 (m, 2H), 2.84-2.78 (m, 2H); <sup>19</sup>F NMR (470 MHz, DMSO-d<sub>6</sub>) δ -81.36 (s); <sup>13</sup>C NMR (125 MHz, DMSO-d<sub>6</sub>): δ 152.7, 142.9, 141.6, 139.0, 136.9, 135.8, 126.0, 123.7, 120.7, 118.6, 116.5, 114.5, 105.7, 60.0, 55.8, 37.2, 36.5; HR-MS: m/z calcd. for C<sub>18</sub>H<sub>21</sub>F<sub>2</sub>NO<sub>7</sub>S: 433.1007, found: 433.1004(M<sup>+</sup>).

2-ethoxy-5-(3,4,5-trimethoxyphenethyl)phenyl sulfamate (**17c**): solid, mp 122-124 °C, yield 75%; <sup>1</sup>H NMR (500 MHz, DMSO-d<sub>6</sub>): δ 7.87 (s, 2H), 7.29 (d, *J* = 7.2 Hz, 1H), 7.10 (dd, 1H), 7.04 (d, *J* = 8.4 Hz, 1H), 6.54 (s, 2H), 4.04 (q, *J* = 6.9 Hz, 2H), 3.74 (s, 6H), 3.61 (s, 3H), 2.80 (d, *J* = 5.7 Hz, 4H), 1.32 (t, *J* = 7.0 Hz, 3H); <sup>13</sup>C NMR (125 MHz, DMSO-d<sub>6</sub>): δ 152.7, 149.1, 147.8, 139.0, 137.2, 135.7, 133.9, 127.8, 127.6, 127.0, 126.7, 123.21, 114.3, 105.7, 64.2, 60.0, 55.8, 37.5, 36.2, 14.6; HR-MS: m/z calcd. for C<sub>19</sub>H<sub>25</sub>NO<sub>7</sub>S: 411.1352, found: 411.1352(M<sup>+</sup>).

3-(3,4,5-trimethoxyphenethyl)phenyl sulfamate (**17d**): solid, mp 118-120 °C, yield 78%; <sup>1</sup>H NMR (500 MHz, CDCl<sub>3</sub>): δ 7.29 (s, 1H), 7.11 (s, 2H), 7.06 (s, 1H), 6.30 (s, 2H), 5.42 (s, 2H), 3.77 (d, *J* = 3.6 Hz, 9H), 2.87 (d, *J* = 8.0 Hz, 2H), 2.83 (d, *J* = 8.2 Hz, 2H); <sup>13</sup>C NMR (125 MHz, CDCl<sub>3</sub>): δ 153.0, 150.2, 143.9, 137.2, 136.0, 129.7, 127.4, 122.2, 119.7, 105.6, 60.9, 56.1, 37.9, 37.6; HR-MS: m/z calcd. for C<sub>17</sub>H<sub>21</sub>NO<sub>6</sub>S: 367.1090, found: 367.1091(M<sup>+</sup>).

3,4,5-trimethoxy-4'-methoxy-3'-amino sulfamate diphenylethane (**20**): solid, mp 124-126 °C, yield 80%; <sup>1</sup>H NMR (500 MHz, CDCl<sub>3</sub>) δ 7.32 (s, 1H), 7.03 (s, 1H), 6.89 (d, *J* = 8.1 Hz, 1H), 6.79 (d, *J* = 8.3 Hz, 1H), 6.36 (s, 2H), 5.02 (s, 2H), 3.79 (d, *J* = 6.9 Hz, 12H), 2.82 (d, *J* = 3.4 Hz, 4H); <sup>13</sup>C NMR (125 MHz, CDCl<sub>3</sub>): δ 153.1, 147.8, 137.4, 136.2, 134.7, 132.1, 132.1, 126.5, 124.8, 120.6, 110.8, 105.7, 60.9, 56.2, 56.0, 38.3, 37.2; HR-MS: m/z calcd. for C<sub>18</sub>H<sub>24</sub>N<sub>2</sub>O<sub>6</sub>S: 396.1355, found: 396.1353(M<sup>+</sup>).

**Synthesis of Compounds 18a, 18b** Under nitrogen protection, to a pre-cooled suspension of compound **12e** (28.29 g, 55.2 mmol) in dry THF (300 mL), *n*-butyl lithium cyclohexane solution (1.6 M) was added dropwise, after stirred at -78 °C for 1 hour, a solution of compound **14** (10.00 g, 55.2 mmol) in dry THF (30 mL) was added, then the reaction was warmed to room temperature and stirred overnight. The solution was poured into ice water, extracted with ethyl acetate, the combined organic phase was concentrated *in vacuum*, the residue was redissolved in acetic acid (20 mL), zinc powder (16.82 g, 255.2 mmol) was added portionwise, the reaction was stirred for 2 hours at room temperature. TLC indicated the reaction completed. The solution was diluted with ethyl acetate, the solid was filtered, the filtrate was washed with brine and saturated sodium bicarbonate solution and water, then dried over anhydrous sodium sulfate. Filtered and concentrated *in vacuum* to remove the solvent, the residue was purified by flash column chromatography on silica gel (eluted with ethyl acetate-petroleum ether, 3:1, v/v) to afford compounds **18a** (2.17 g) and **18b** (1.92 g).

(*Z*)-2-methoxy-5-(3, 4, 5-trimethoxystyryl) aniline (**18a**): oil, yield 30%; <sup>1</sup>H NMR (500 MHz, CDCl<sub>3</sub>): δ 6.67 (s, 1H), 6.65 (s, 2H), 6.54 (s, 2H), 6.43 (d, *J* = 12.0 Hz, 1H), 6.35 (d, *J* = 12.0 Hz, 1H), 3.82 (s, 3H), 3.79 (s, 3H), 3.68 (s, 6H); <sup>13</sup>C NMR (125 MHz, CDCl<sub>3</sub>): δ 153.5, 147.5, 137.7, 136.4, 133.7, 130.5, 128.4, 126.4, 117.8, 112.3, 110.5, 103.4, 61.0, 56.2, 55.7; HR-MS: m/z calcd. for C<sub>18</sub>H<sub>21</sub>NO<sub>4</sub>, 315.1471, found: 315.1470(M<sup>+</sup>).

(*E*)-2-methoxy-5-(3, 4, 5-trimethoxystyryl) aniline (**18b**): solid, mp 116-117 °C, yield 26%; <sup>1</sup>H NMR (500 MHz, CDCl<sub>3</sub>) δ 6.92 (s, 1H), 6.88 (s, 1H), 6.86 (d, *J* = 4.7 Hz, 1H), 6.80 (d, *J* = 16.0 Hz, 1H), 6.73 (d, *J* = 16.0 Hz, 1H), 6.70 (s, 2H), 3.90 (s, 6H), 3.86 (d, *J* = 3.5 Hz, 6H); <sup>13</sup>C NMR (125 MHz, CDCl<sub>3</sub>): δ 153.4,



147.4, 137.6, 136.4, 133.6, 130.4, 128.3, 126.4, 117.8, 112.3, 110.5, 103.4, 61.0, 56.1, 55.6; HR-MS: m/z calcd. for C<sub>18</sub>H<sub>21</sub>NO<sub>4</sub>, 315.1471, found: 315.1472(M<sup>+</sup>).

### Biological activity assay

**In vitro antiproliferation activity test.** The experiment was performed in Nanjing OGPharmaceutical Co., Ltd.. Cancer cell lines were obtained from the American type Culture Collection (ATCT, Rockville, USA) and were cultured according to the supplier's instructions. Human lung cancer cell A549, human gastric cancer cell MGC-803, human breast cancer cell MCF-7 and human hepatoma cell HepG2 were cultured in RPMI 1640 medium containing 10 % fetal bovine serum, human colon cancer cell HCT-116, human cervical cancer cells HeLa and human gastric cancer cells MKN45 were maintained in Dulbecco's minimal essential medium (DMEM) containing 10 % fetal bovine serum and maintained at 37 °C and 5 % CO<sub>2</sub> incubators (SANYO, MCO-15AC). The cell proliferation inhibition test was performed using the EnoGeneCell Counting Kit-8 (CCK-8) Cell Viability Assay Kit, and the experiment was performed using a viable cell ratio of 90% or more. Cells were digested and counted to prepare a cell suspension at a concentration of 1 × 10<sup>5</sup> cells/mL. A 100 μL cell suspension was added to each well in a 96-well plate (1×10<sup>4</sup> cells per well) for 24 hours at 37 °C and 5 % CO<sub>2</sub> incubators, 100 μL of the corresponding drug-containing medium was added to each well while the negative control group, the vehicle control group and the positive control group were set up with 5 wells in each group. The 96-well plate was placed at 37 °C and CO<sub>2</sub> incubator for 72 hours, afterwards 10 μL of CCK-8 solution was added to each well. And the plates were incubated in the incubator for 4 hours, the OD values were determined at 450 nm with a spectrophotometric plate reader(Thermo scientific, MUTISKAN MK3). Each sample was test for three time at ten different concentration. The inhibitory rate was determined as follows: inhibitory% = (OD<sub>sample</sub>-OD<sub>blank</sub>)/(OD<sub>control</sub>-OD<sub>blank</sub>)×100%, and the IC<sub>50</sub> value (inhibitory concentration for 50% of cells) was determined using the GraphPad Prism software.

**In vitro sulfatase activity test.** The steroid sulfatase was purchased from Sigma-Aldrich. The test compounds were weighted and dissolved in dimethylsulfoxide, then diluted with Tri-HCl buffer (0.1M, pH = 7.4) at 2, 5, 10, 20, 50, 100, 200, 500, 1000, 2000, 5000 and 10000 times. Steriod sulfatase and potassium *p*-nitrophenyl sulfate were directly dissolved in Tris-HCl buffer. To a 96-well plate was incubated with 40 μL of the test sample, 50 μL of aryl sulfatase and 50 μL of potassium *p*-nitrophenyl sulfate for 5 minutes, the OD values were determined by a microplate reader at 405 nm. The blank control (no sulfatase) and standard control (no sample) were also test in same procedure by adding Tris-HCl buffer to make up the volume. Each sample was test for three time at ten different concentration. The inhibitory rate was determined as follows: inhibitory% = {1-(OD<sub>sample</sub>-OD<sub>blank</sub>)/(OD<sub>control</sub>-OD<sub>blank</sub>)}×100%, and the IC<sub>50</sub> value was determined using the GraphPad Prism software.

**In vitro tubulin polymerization assay.** Pig brain microtubule protein was isolated by three cycles of temperature-dependent assembly/disassembly in 100 mM PIPES (pH 6.5), 1 mM MgSO<sub>4</sub>, 2 mM EGTA, 1 mM GTP and 1 mM 2-mercaptoethanol. In the first cycle of polymerization, glycerol and phenylmethylsulfonyl fluoride were added to 4 M and 0.2 mM, respectively. Homogeneous tubulin was prepared from microtubule protein by phosphocellulose (P11) chromatography. The purified proteins were stored in aliquots at -70 °C.

Tubulin (4.8 mg/ml) protein was mixed with different concentrations of compound in PEM buffer (100 mM PIPES, 1 mM MgCl<sub>2</sub>, and 1 mM EGTA) containing 1 mM GTP and 5 % glycerol. Microtubule polymerization was monitored at 37 °C by light scattering at 340 nm using a SPECTRA MAX 190 (Molecular Device) spectrophotometer. The plateau absorbance values were used for calculations. Each sample was test for three time at ten different concentration. The inhibitory rate was determined as follows: inhibitory% = {1-(OD<sub>sample</sub>-OD<sub>blank</sub>)/(OD<sub>control</sub>-OD<sub>blank</sub>)}×100%, and the IC<sub>50</sub> value (inhibitory concentration for 50% of cells) was determined using the GraphPad Prism software.

## Molecular Docking

The crystal structure of tubulin-Combretastatin A4 complex (PDB: 5LYJ) and arylsulfatase-EMATE complex (PDB:1P49) were retrieved from the Research Collaboratory for Structural Bioinformatics (RCSB) protein data bank. Compound **16a** were constructed using the sketcher module in Sybyl and their minimum energy conformations were calculated using the minimize module of Sybyl. The force field was Tripos with an 8 Å cutoff for non-bonded interactions, and the atomic point charges were also calculated with Gasteiger-Huckel. Minimizations were achieved using the steepest descent method for the first 100 steps, followed by the Broyden-Fletcher-Goldfarb-Shanno (BFGS) method until the root-mean-square (RMS) of the gradient became  $< 0.005$  kcal/(mol·Å). The Surflex-Dock module implemented in the Sybyl program was used for the docking studies. The colchicine binding-site of tubulin and EMATE binding-site of steroid sulfatase were used for the docking simulation, the original ligand (CA-4 and EMATE) in the crystal structure was used as control. Compound **16a** were docked into the binding site by an empirical scoring function and a patented search engine in Surflex-Dock, applied with the automatic docking. Other parameters were established by default in the software

## Structure activity relationship discussion on arylsulfatase and tubulin polymerization inhibition

From the inhibitory activity results of **16a**, **16b** and **17a** on arylsulfatase and tubulin, we can infer that the cis-isomer is better than trans-isomer and saturated bond linked analogues. The electronic effects of R group was studied by comparing the activity of compound **16a**, **16c**, **16e** and **16g** on both targets. The potency of **16c** with difluoromethoxy group increased slightly relating to the electronic withdrawing effect of difluoromethyl group, which indicate an electronic withdrawing group on this position is favorable for arylsulfatase inhibition while unfavorable for tubulin inhibition at the same time. The steric effects of R group was studied by the comparison of compound **16a**, **16e** and **16g**. Compound **16a** showed comparable potency on steroid sulfatase ( $IC_{50} = 6.16$   $\mu$ M) with EMATE ( $IC_{50} = 5.01$   $\mu$ M) and similar potency on cel with combretastatin A-4. **16g** (R = H), removing the methoxyl group of **16a**, showed the increasing inhibitory activity for sulfatase about ten times ( $IC_{50} = 0.47$   $\mu$ M), however the potency of **16g** on cell dropped rapidly as it lost the potency on tubulin inhibition ( $IC_{50} > 100$   $\mu$ M). On the contrary, when the methoxyl of **16a** was replaced with a little bulky ethoxyl group to give **16e** (R = OEt), the potency on tubulin increased ( $IC_{50} = 3.10$   $\mu$ M), although its potency on steroid sulfatase dramatically decreased ( $IC_{50} = 90.19$   $\mu$ M), the cell level activity is close with that of EMATE. These results indicate the steric effect at R position is favorable for tubulin inhibition but unfavorable for arylsulfatase inhibition. The substitution effect of the amino group of sulfamide was studied from **16i** and **16j**, the monomethylated and dimethylated **16a**. By comparing with **16a**, their potency on steroid sulfatase inhibition were lost. however, their potency on tubulin polymerization were different, monomethyl substitution (**16i**,  $IC_{50} = 1.80$   $\mu$ M) showed improved the potency with about 3 times, while dimethyl substitution (**16j**,  $IC_{50} = 12.50$   $\mu$ M) illustrated the decreased potency about 2 times. This result indicates that the amino group of **16a** probably has critical hydrogen bond interaction with the binding site of both targets, in other words, the steric hindrance factors caused by substitution on amino group can also affect activity. The lost contribution to cytotoxicity of **16i** on sulfatase inhibition was probably compensated by its improved potency on tubulin. In addition, **19a** showed no activity on arylsulfatase, which implies that a hydrogen bond donor probably exists in the binding site. This is consistent with the fact that sulfatase only specific hydrolysis of sulphate instead of sulfamide. From the structure-activity-relationship analysis of **16(c-j)** on arylsulfatase and tubulin inhibition and their contribution to anti-tumor activity, we can conclude that tubulin inhibition plays a dominant role over arylsulfatase inhibition in this kind dual inhibitor.

**HPLC condition and the purity data of compounds 16a-16j, 17a-17d, 19a, 19b, 20.**

|           |                                                                                                                                                                                                                               |                      |                     |                |
|-----------|-------------------------------------------------------------------------------------------------------------------------------------------------------------------------------------------------------------------------------|----------------------|---------------------|----------------|
| Equipment | Shimadzu LC-15C with double pump, UV detector                                                                                                                                                                                 |                      |                     |                |
| Column    | Shimadzu Wondasil C18-WR (150×4.6 mm, 5 μm particle size)                                                                                                                                                                     |                      |                     |                |
| Condition | CH <sub>3</sub> CN(0.1% CF <sub>3</sub> COOH) : H <sub>2</sub> O(0.1 % CF <sub>3</sub> COOH) = 20 : 80 (v/v) as eluent, flow rate: 1.0 mL/min, detection wavelength: 276 nm. The purity was determined by area normalization. |                      |                     |                |
| Results   | Compd. No.                                                                                                                                                                                                                    | Retention time (min) | Relative purity (%) | Spectra (page) |
|           | <b>16a</b>                                                                                                                                                                                                                    | 11.68                | 98.70               | S42            |
|           | <b>16b</b>                                                                                                                                                                                                                    | 9.161                | 99.88               | S46            |
|           | <b>16c</b>                                                                                                                                                                                                                    | 9.916                | 95.66               | S51            |
|           | <b>16d</b>                                                                                                                                                                                                                    | 9.543                | 98.49               | S56            |
|           | <b>16e</b>                                                                                                                                                                                                                    | 9.446                | 98.23               | S60            |
|           | <b>16f</b>                                                                                                                                                                                                                    | 9.522                | 99.82               | S64            |
|           | <b>16g</b>                                                                                                                                                                                                                    | 9.193                | 96.00               | S68            |
|           | <b>16h</b>                                                                                                                                                                                                                    | 9.184                | 99.58               | S72            |
|           | <b>16i</b>                                                                                                                                                                                                                    | 9.524                | 97.23               | S76            |
|           | <b>16j</b>                                                                                                                                                                                                                    | 10.29                | 95.77               | S80            |
|           | <b>17a</b>                                                                                                                                                                                                                    | 9.054                | 99.30               | S84            |
|           | <b>17b</b>                                                                                                                                                                                                                    | 9.202                | 96.76               | S88            |
|           | <b>17c</b>                                                                                                                                                                                                                    | 9.451                | 98.13               | S92            |
|           | <b>17d</b>                                                                                                                                                                                                                    | 9.060                | 93.79               | S96            |
|           | <b>19a</b>                                                                                                                                                                                                                    | 9.215                | 95.45               | S104           |
|           | <b>19b</b>                                                                                                                                                                                                                    | 8.791                | 96.84               | S108           |
| <b>20</b> | 8.703                                                                                                                                                                                                                         | 95.16                | S112                |                |

Compound 13a.  $^1\text{H}$  NMR  $\text{CDCl}_3$ , 500 MHz

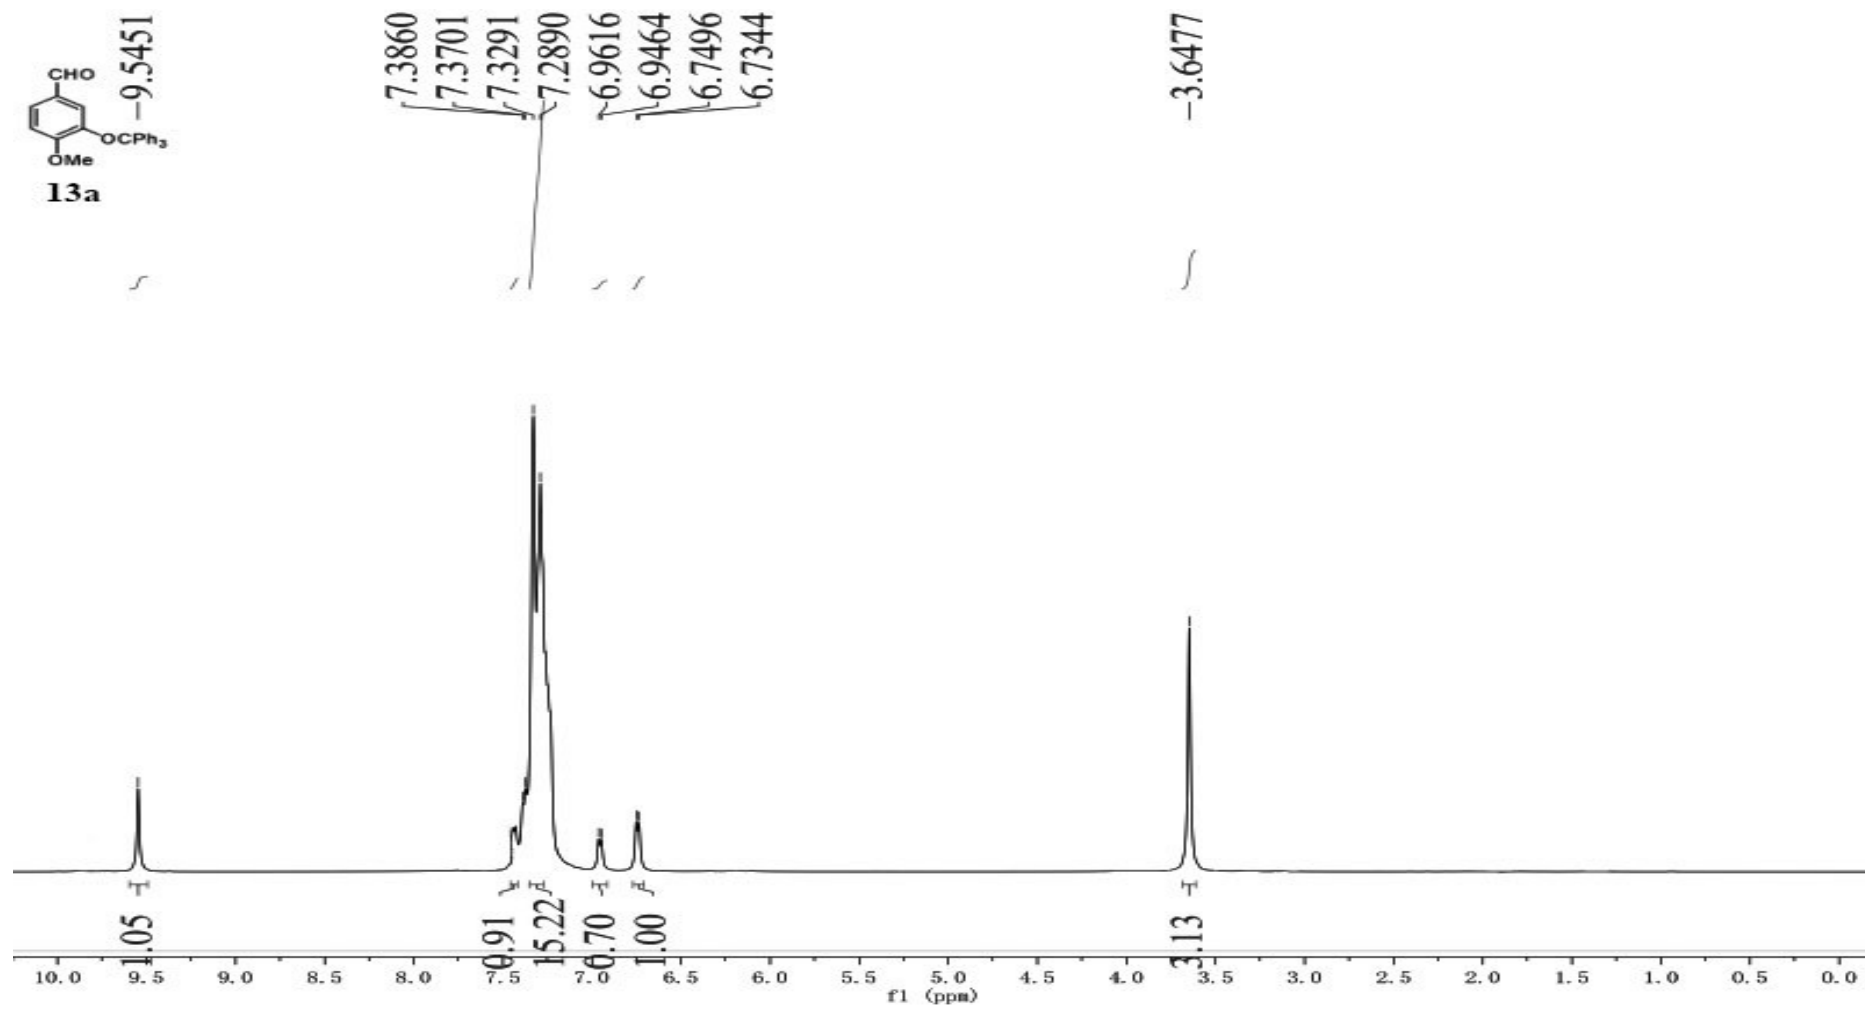

Compound 13a.  $^{13}\text{C}$  NMR,  $\text{CDCl}_3$ , 125 MHz

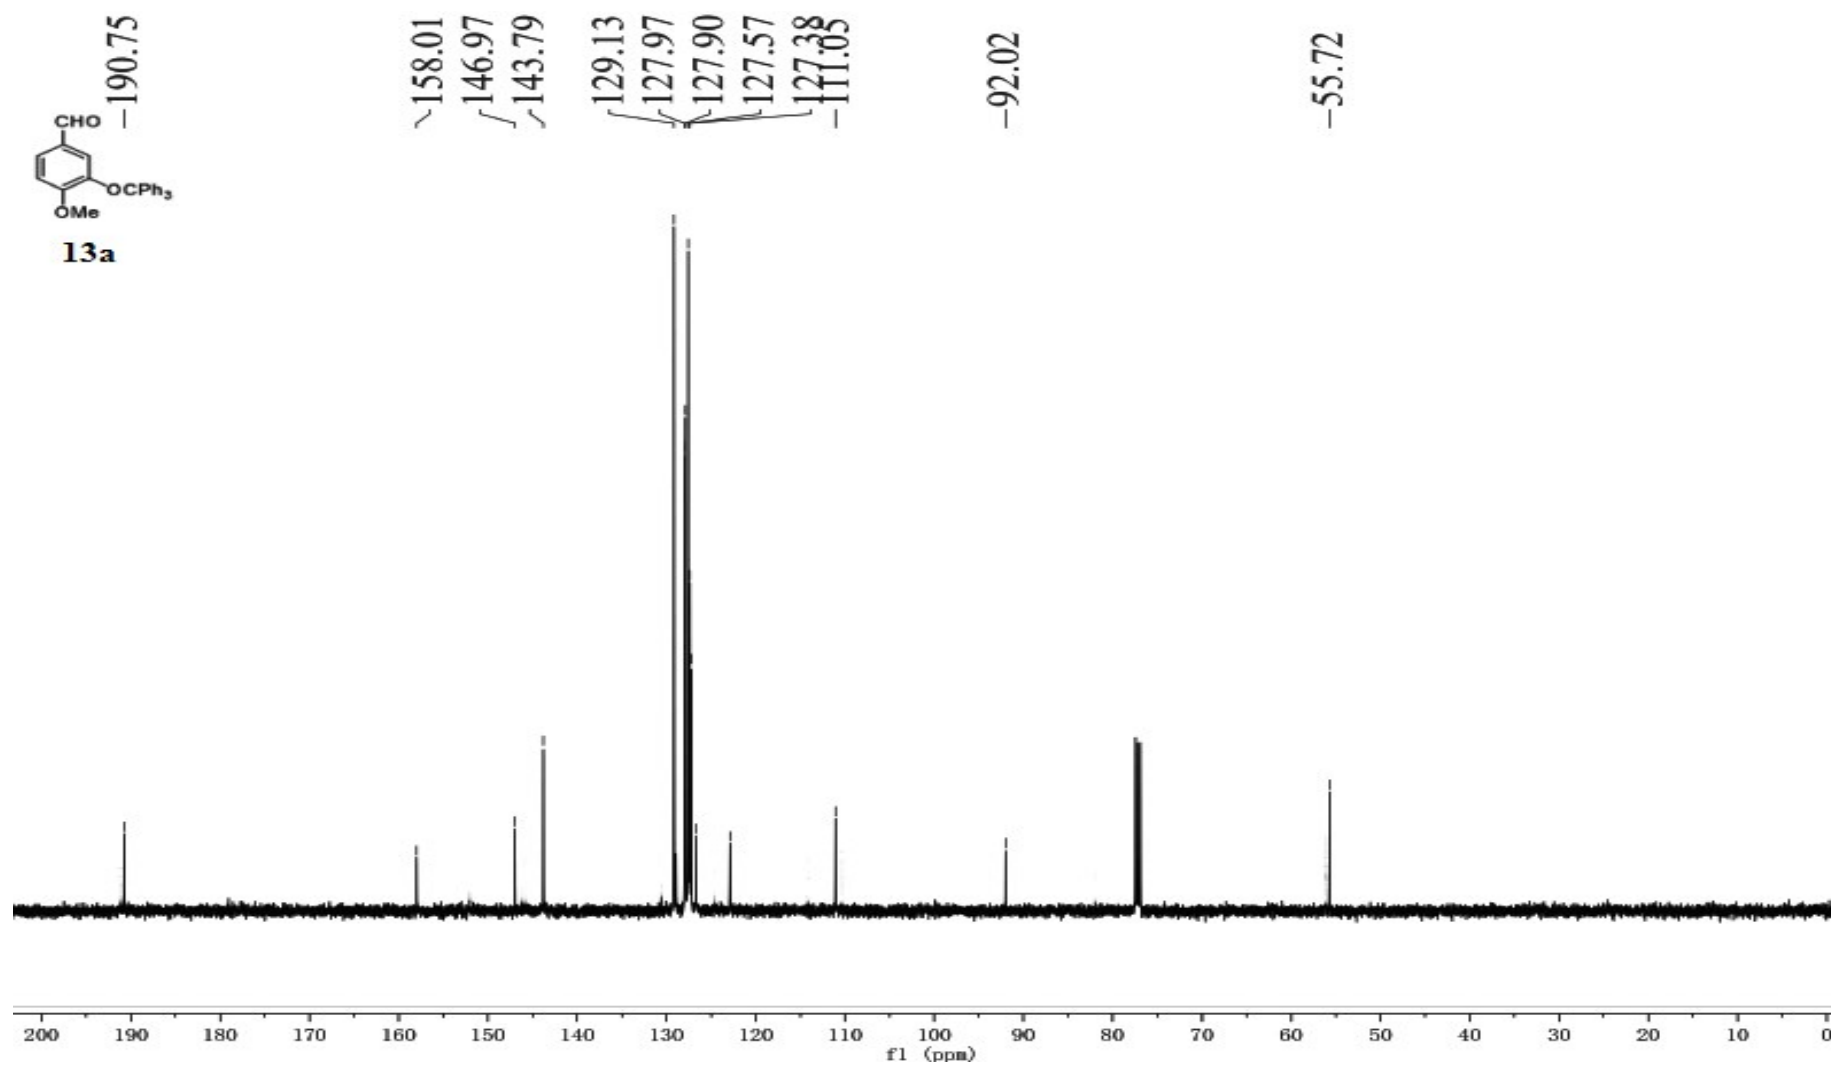

Compound 13b.  $^1\text{H}$  NMR,  $\text{CDCl}_3$ , 500 MHz

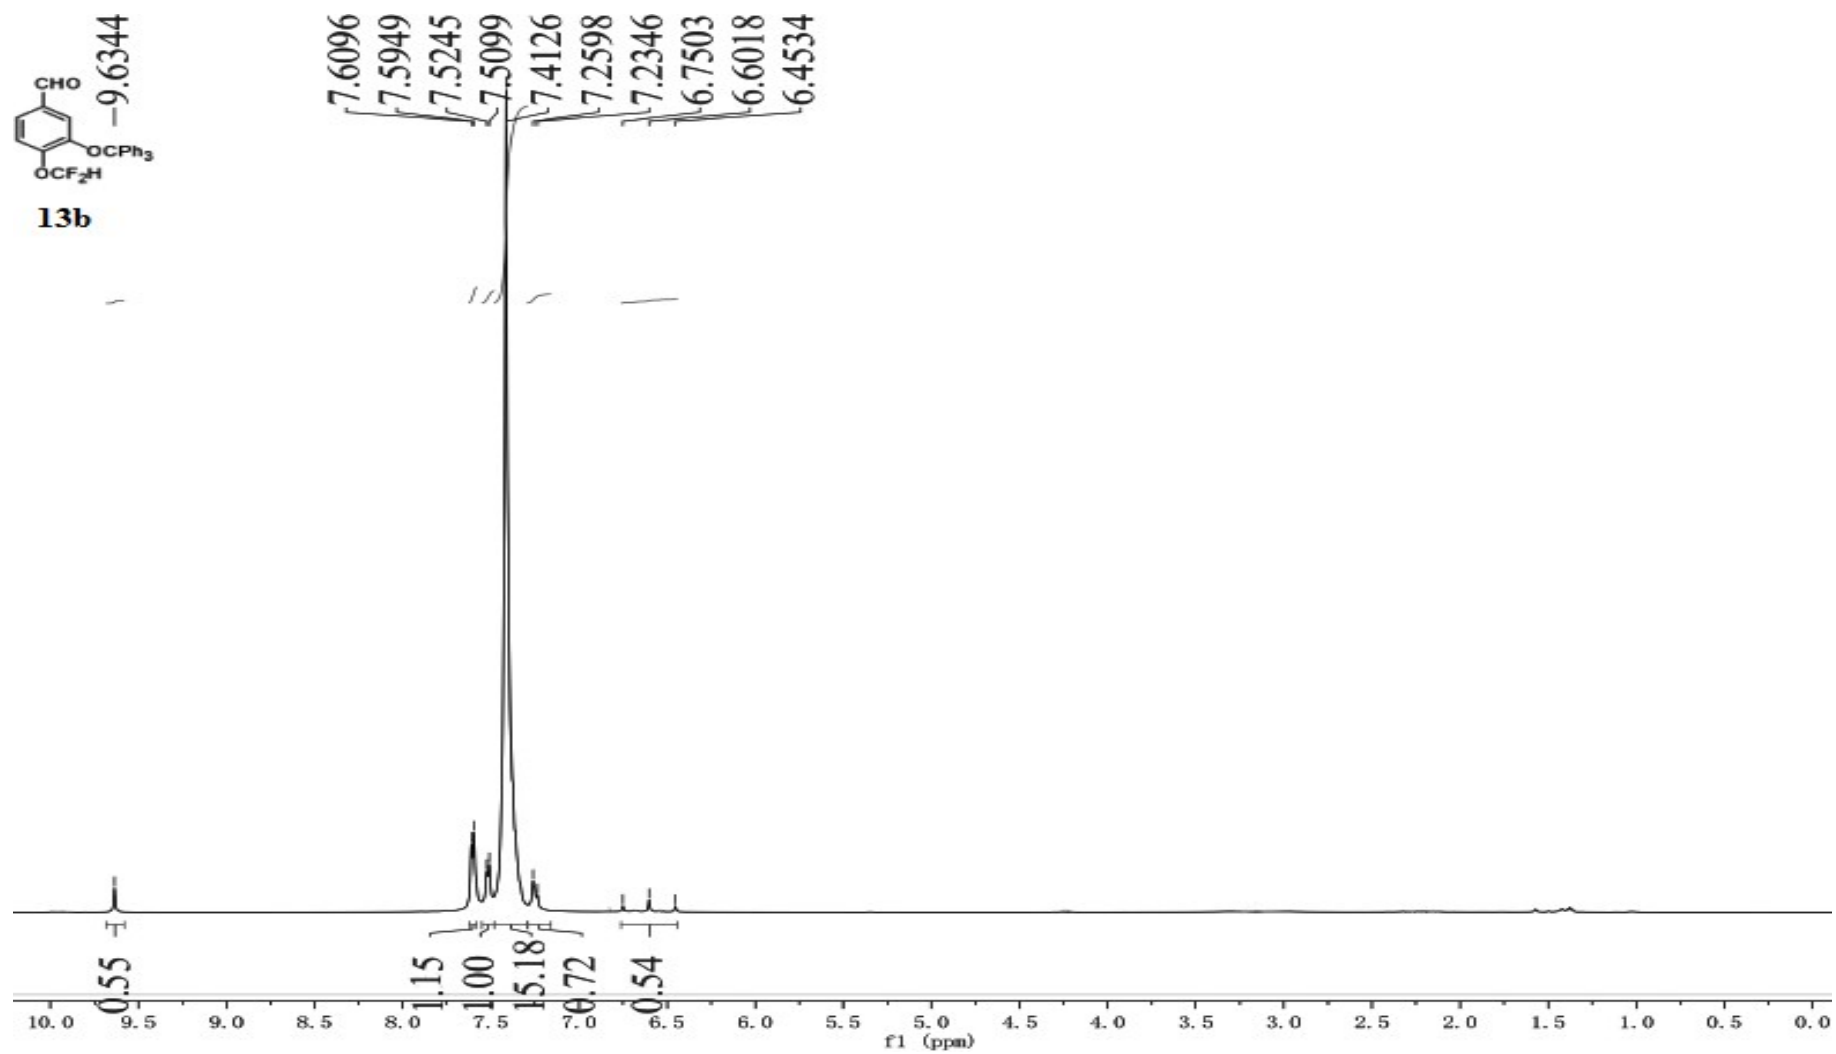

Compound 13b.  $^{19}\text{F}$  NMR,  $\text{CDCl}_3$ , 145MHz

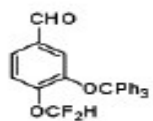

**13b**

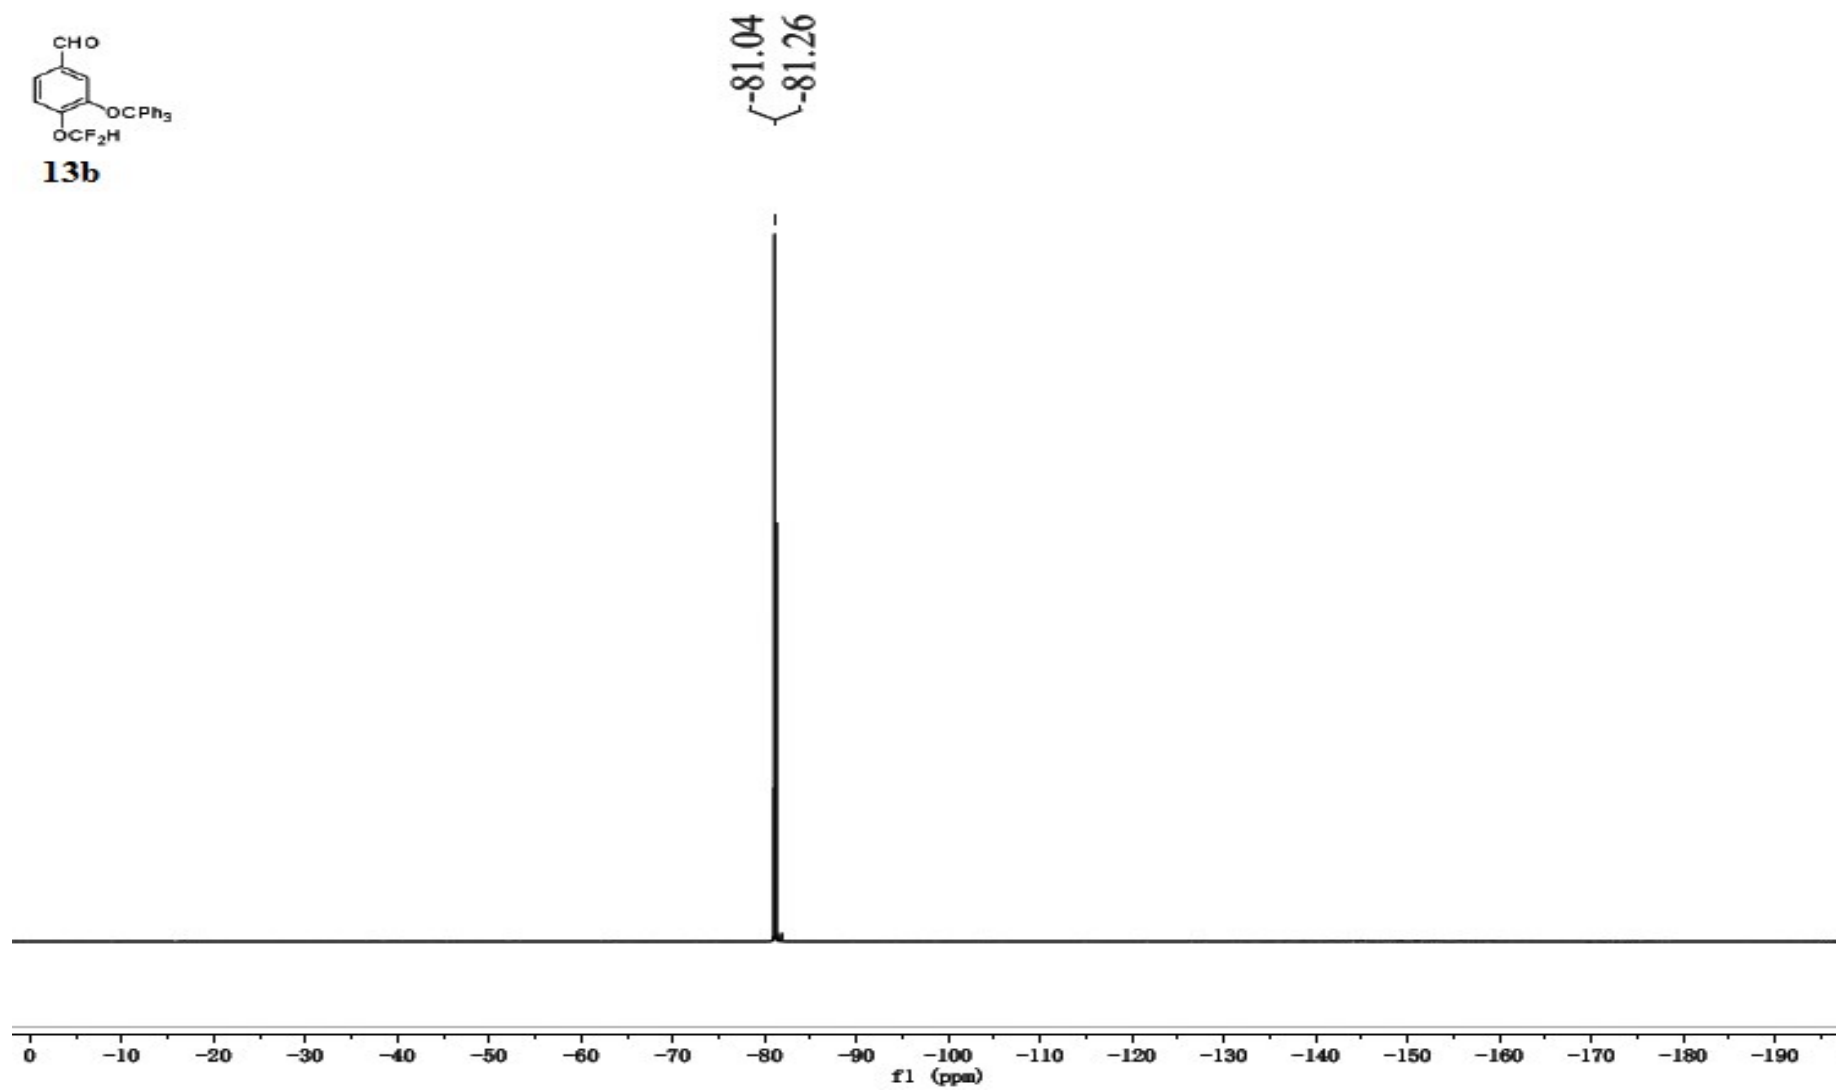

Compound 13b.  $^{13}\text{C}$  NMR,  $\text{CDCl}_3$ , 125 MHz

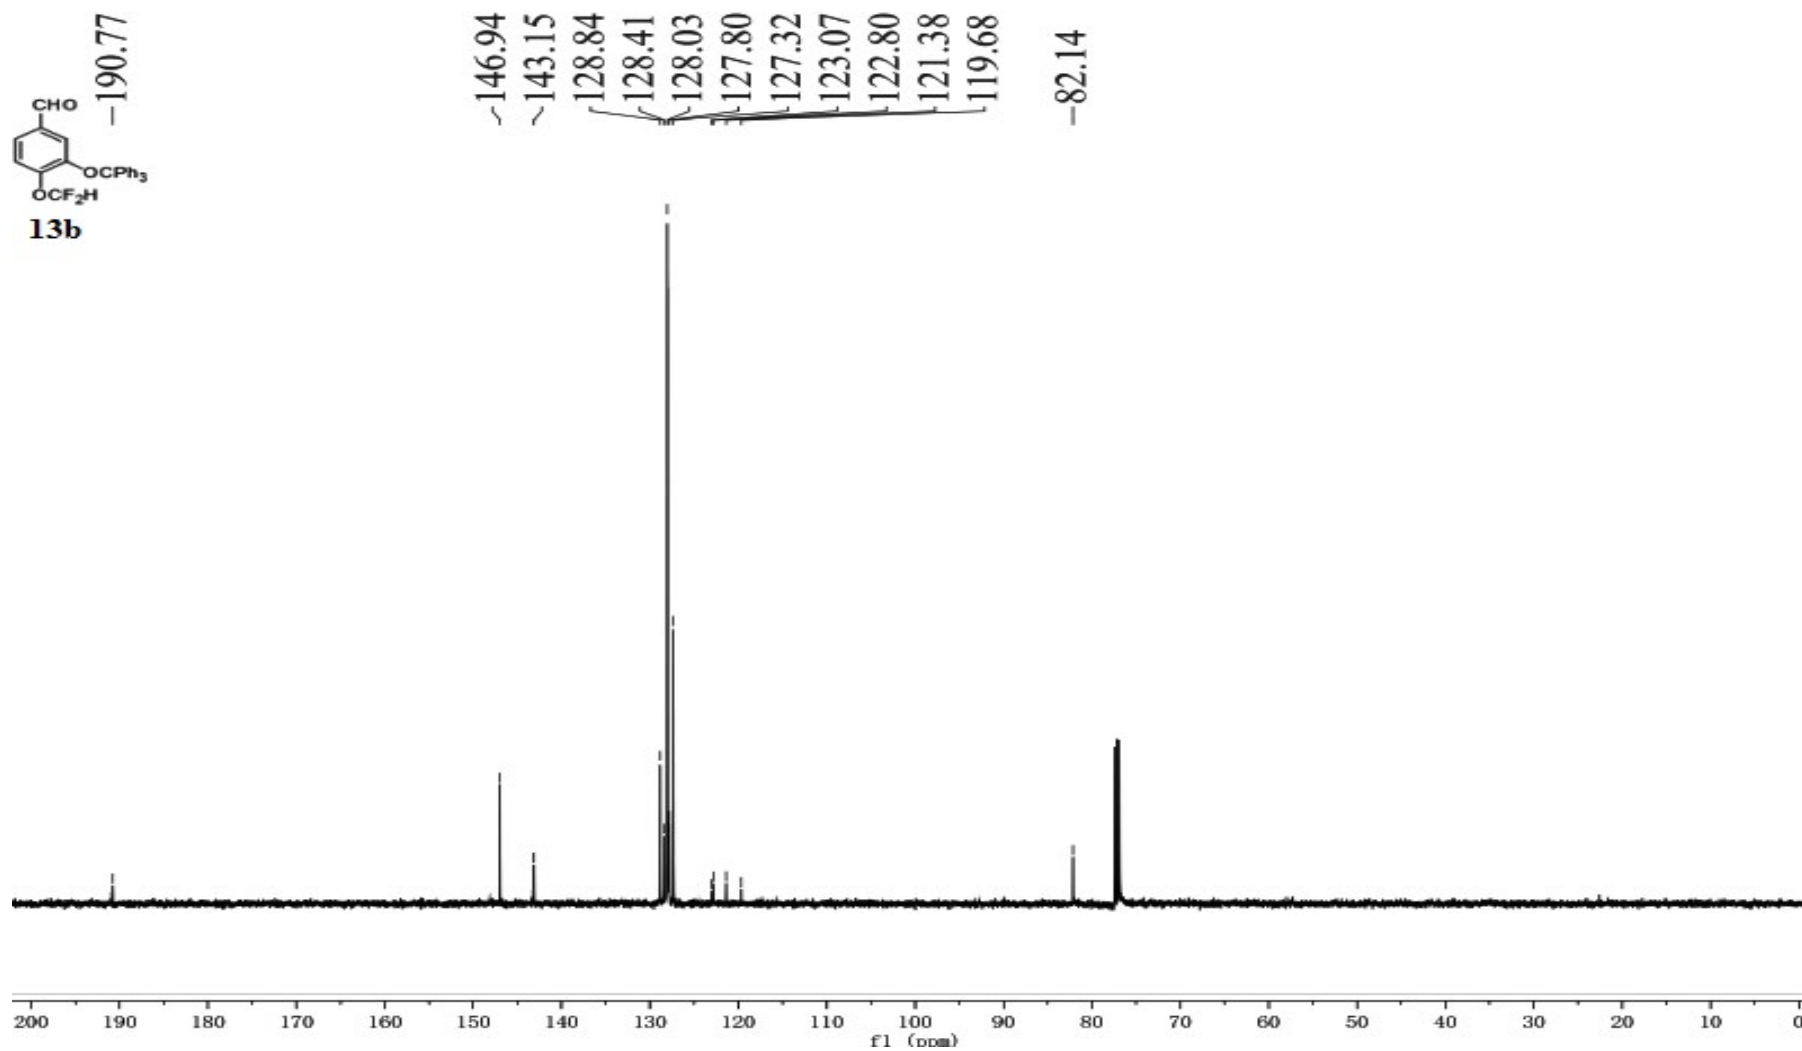

Compound 13c.  $^1\text{H}$  NMR,  $\text{CDCl}_3$ , 500 MHz



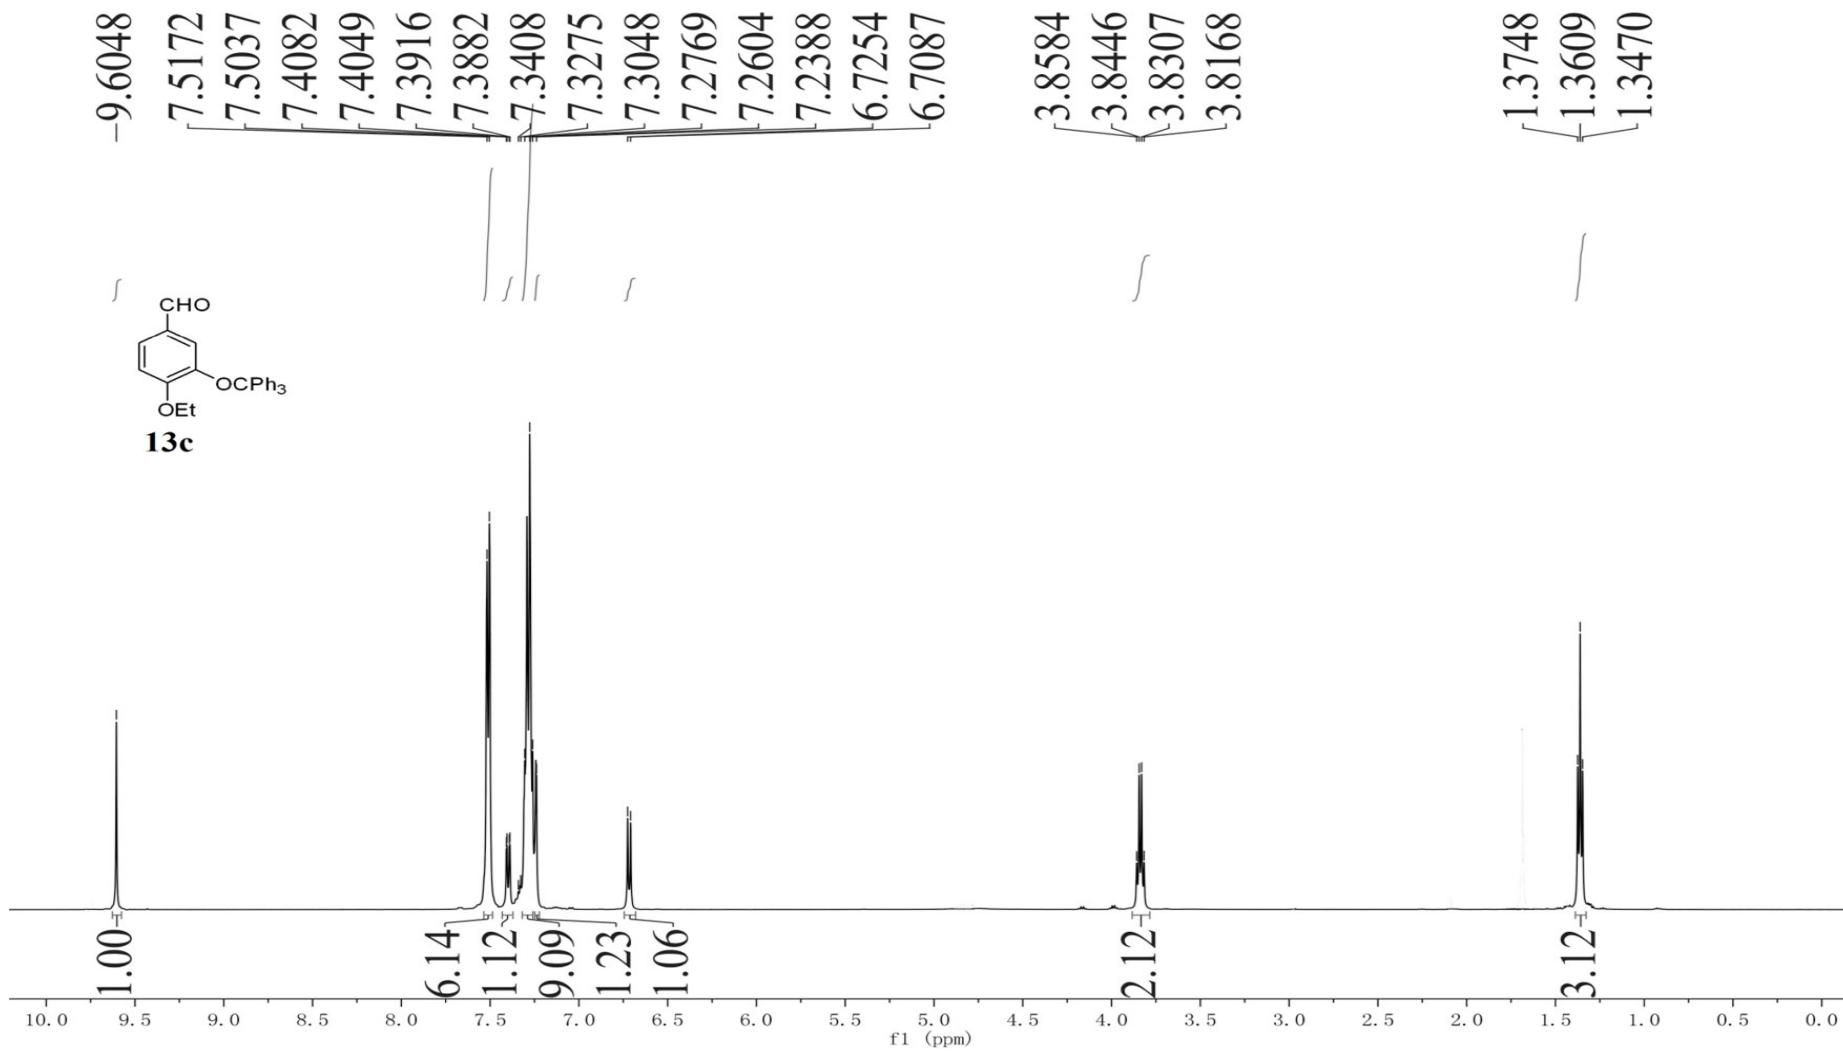

**Compound 13c.**  $^{13}\text{C}$  NMR,  $\text{CDCl}_3$ , 125 MHz

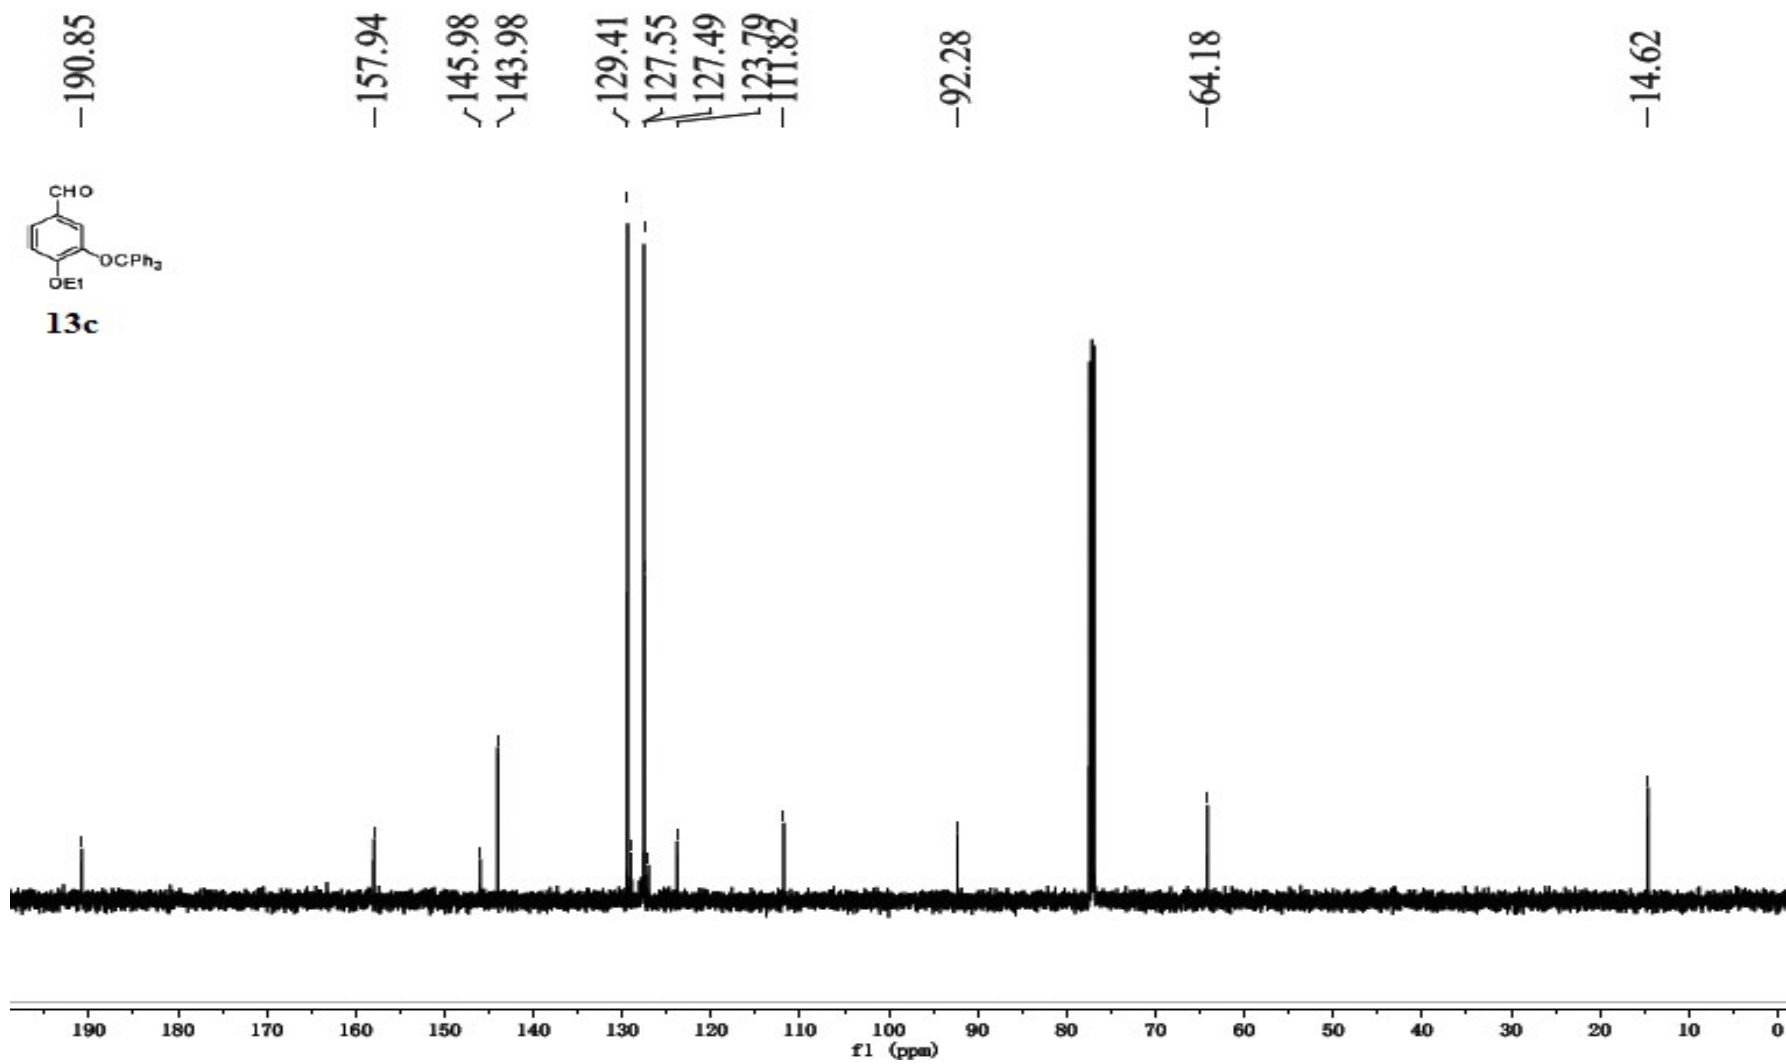

Compound 13d. <sup>1</sup>H NMR, CDCl<sub>3</sub>, 500 MHz

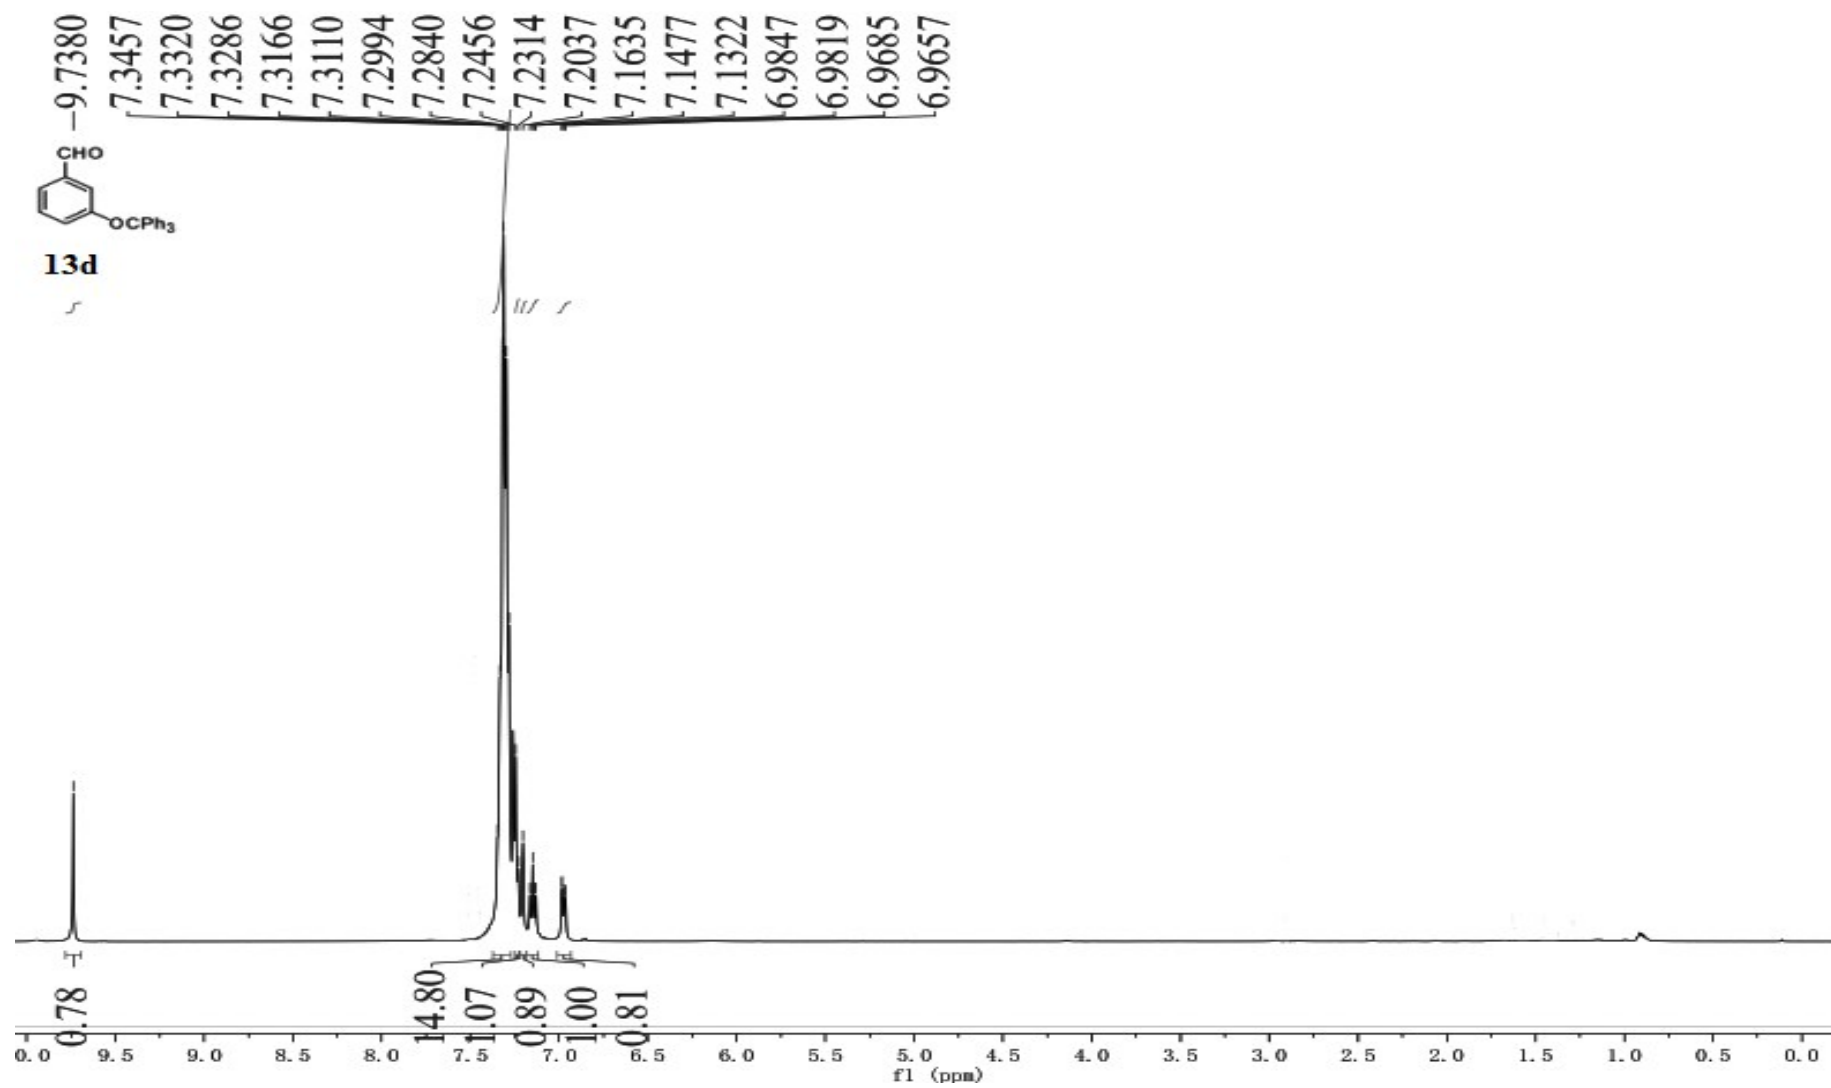

Compound 13d.  $^{13}\text{C}$  NMR,  $\text{CDCl}_3$ , 125 MHz

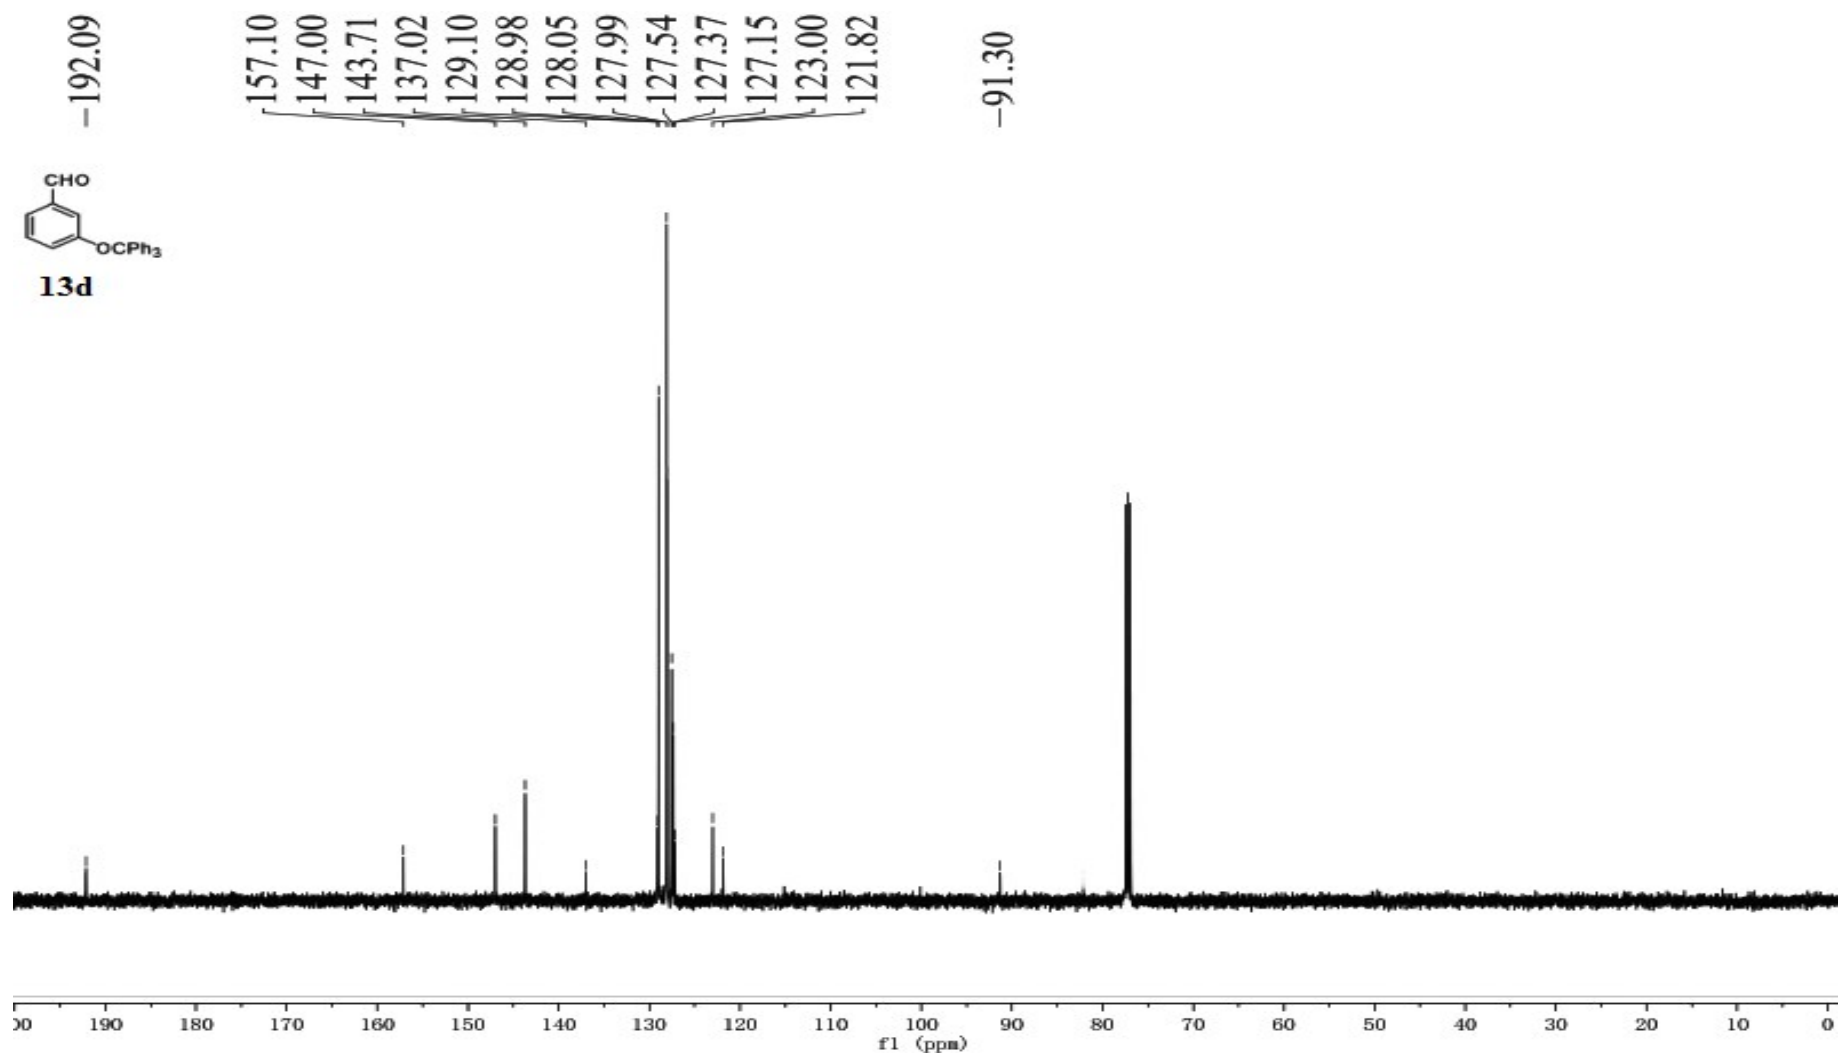

Compound 15a.  $^1\text{H}$  NMR,  $\text{CDCl}_3$ , 500 MHz

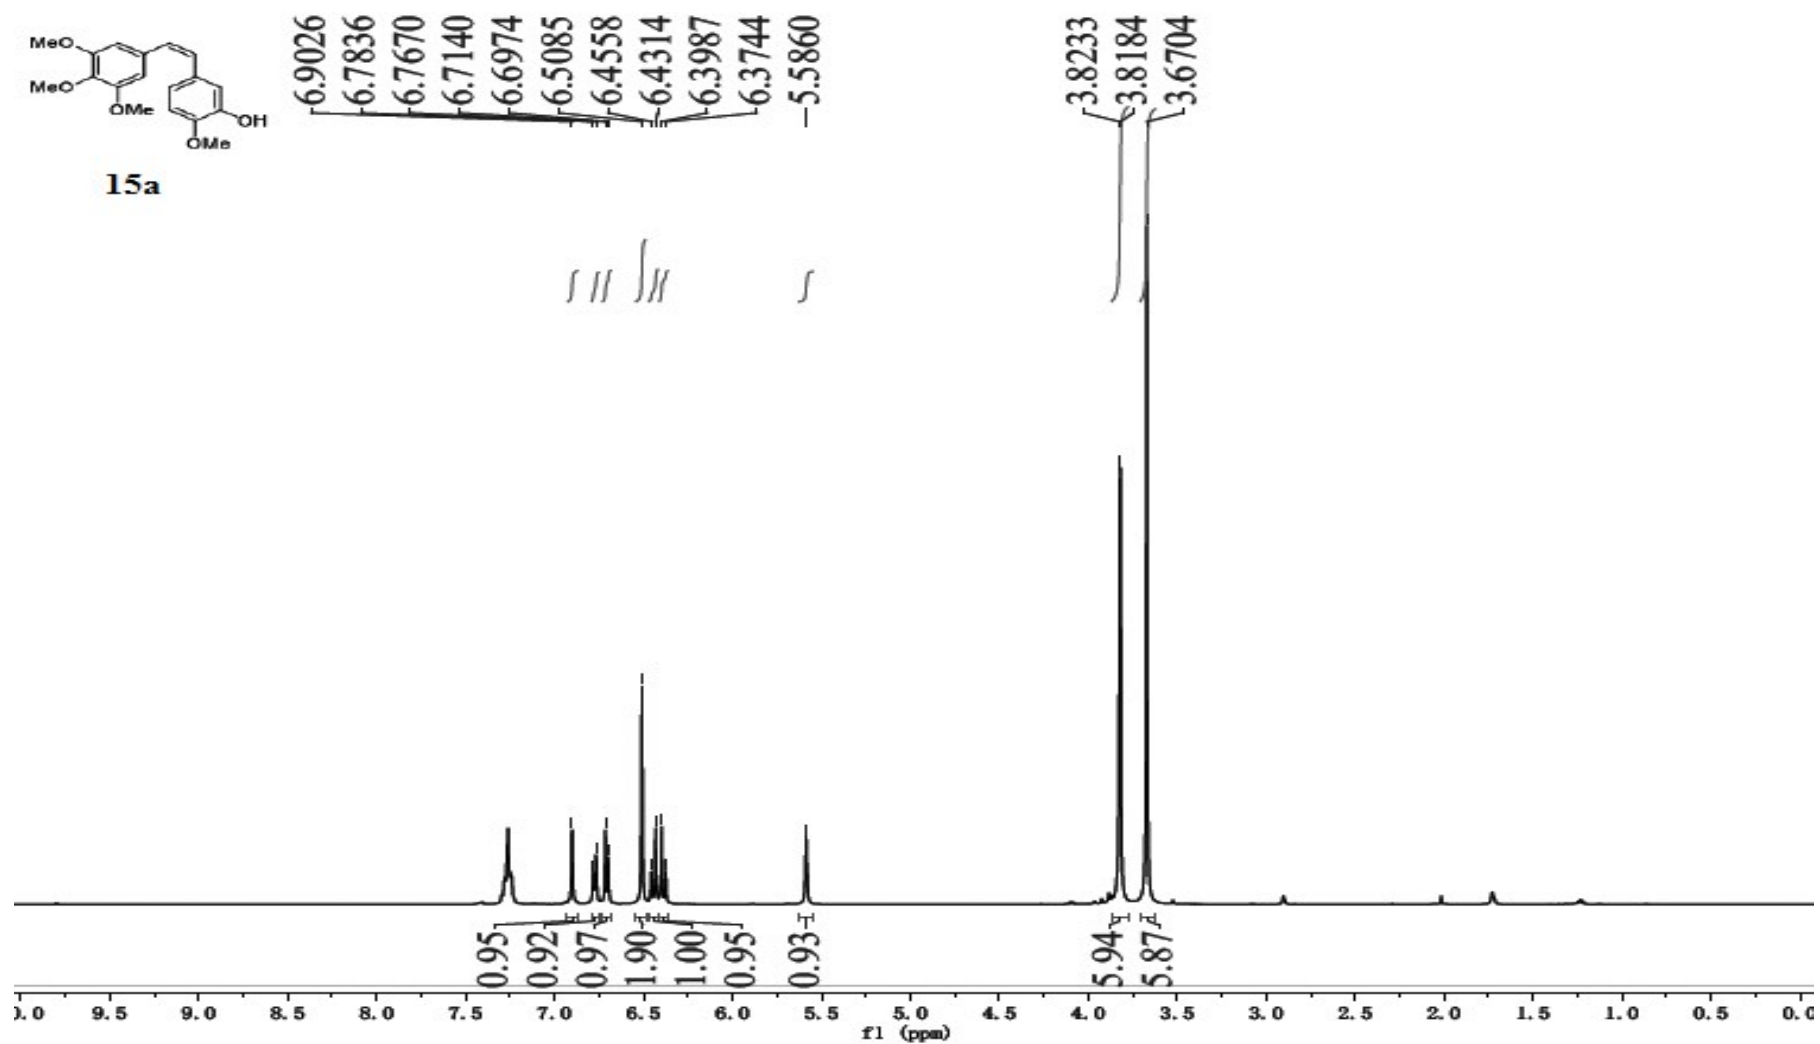

Compound 15a.  $^{13}\text{C}$  NMR,  $\text{CDCl}_3$ , 125 MHz

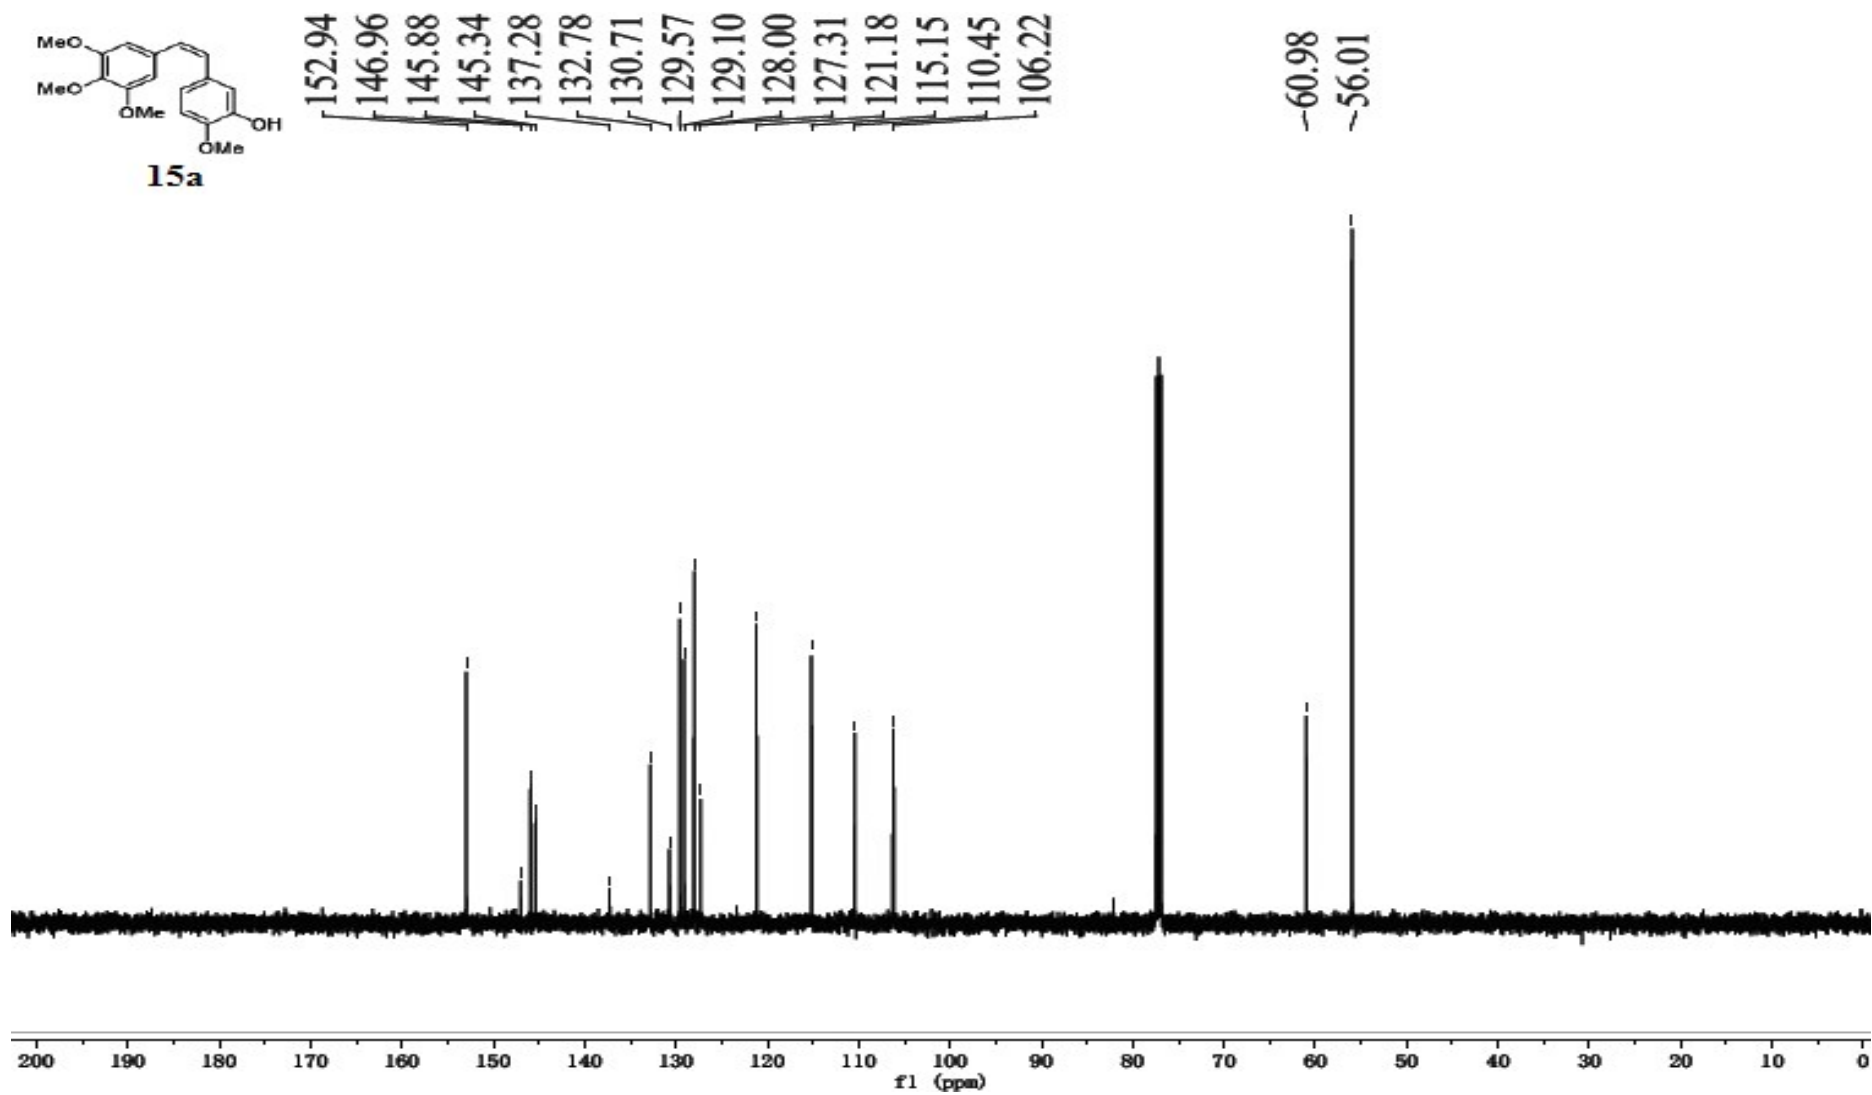

Compound **15b**. <sup>1</sup>H NMR, CDCl<sub>3</sub>, 500 MHz

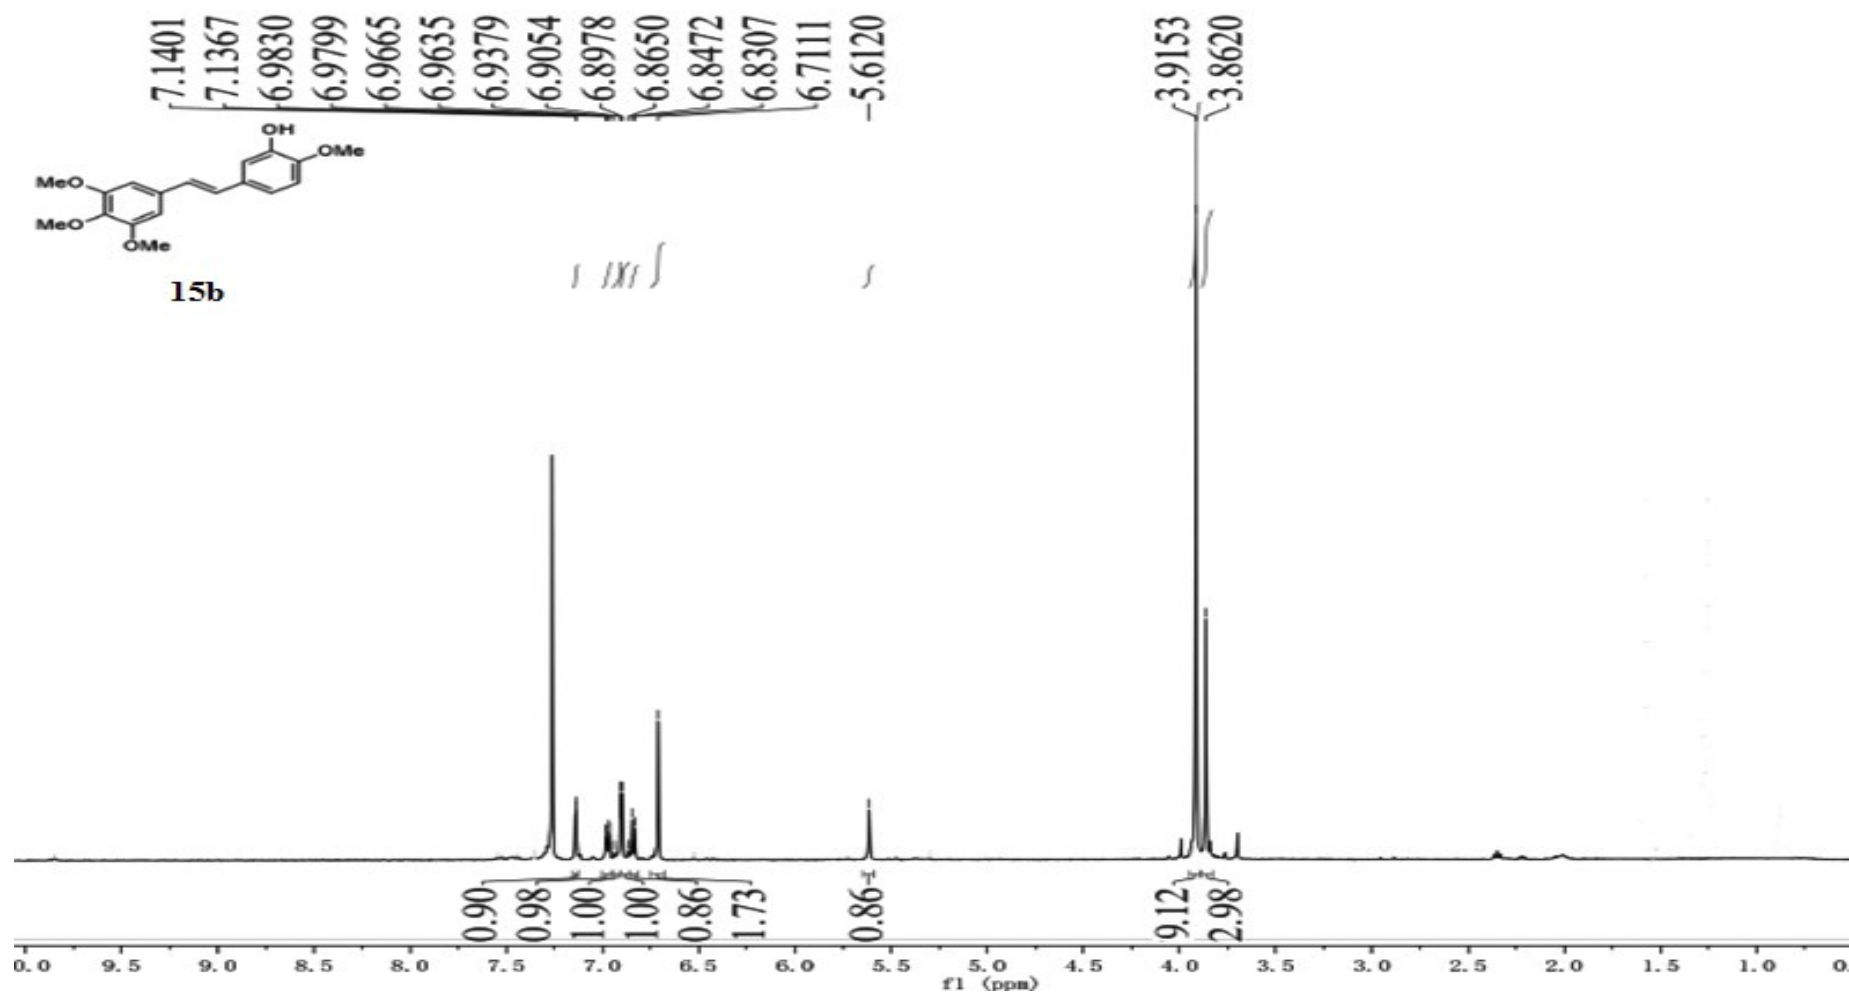

**Compound 15b.** <sup>13</sup>C NMR, CDCl<sub>3</sub>, 125 MHz

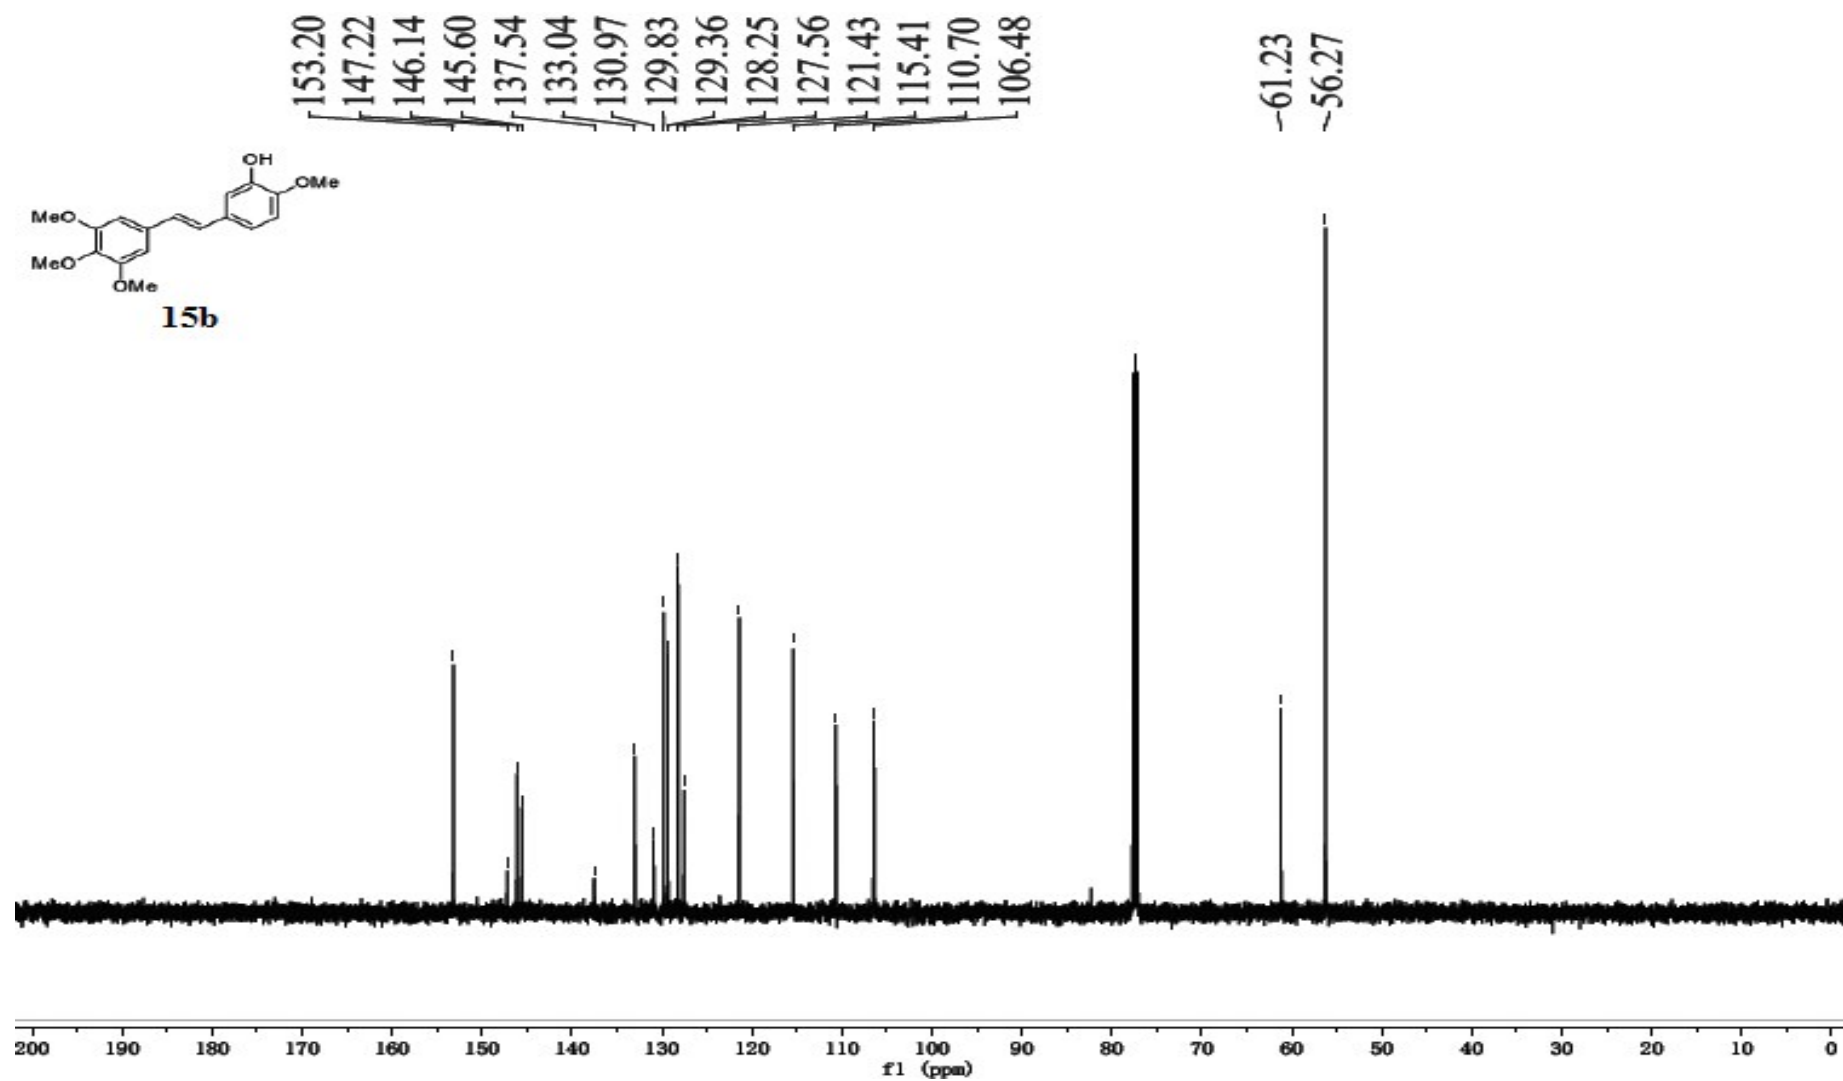



Compound 15c.  $^1\text{H}$  NMR,  $\text{CDCl}_3$ , 500 MHz

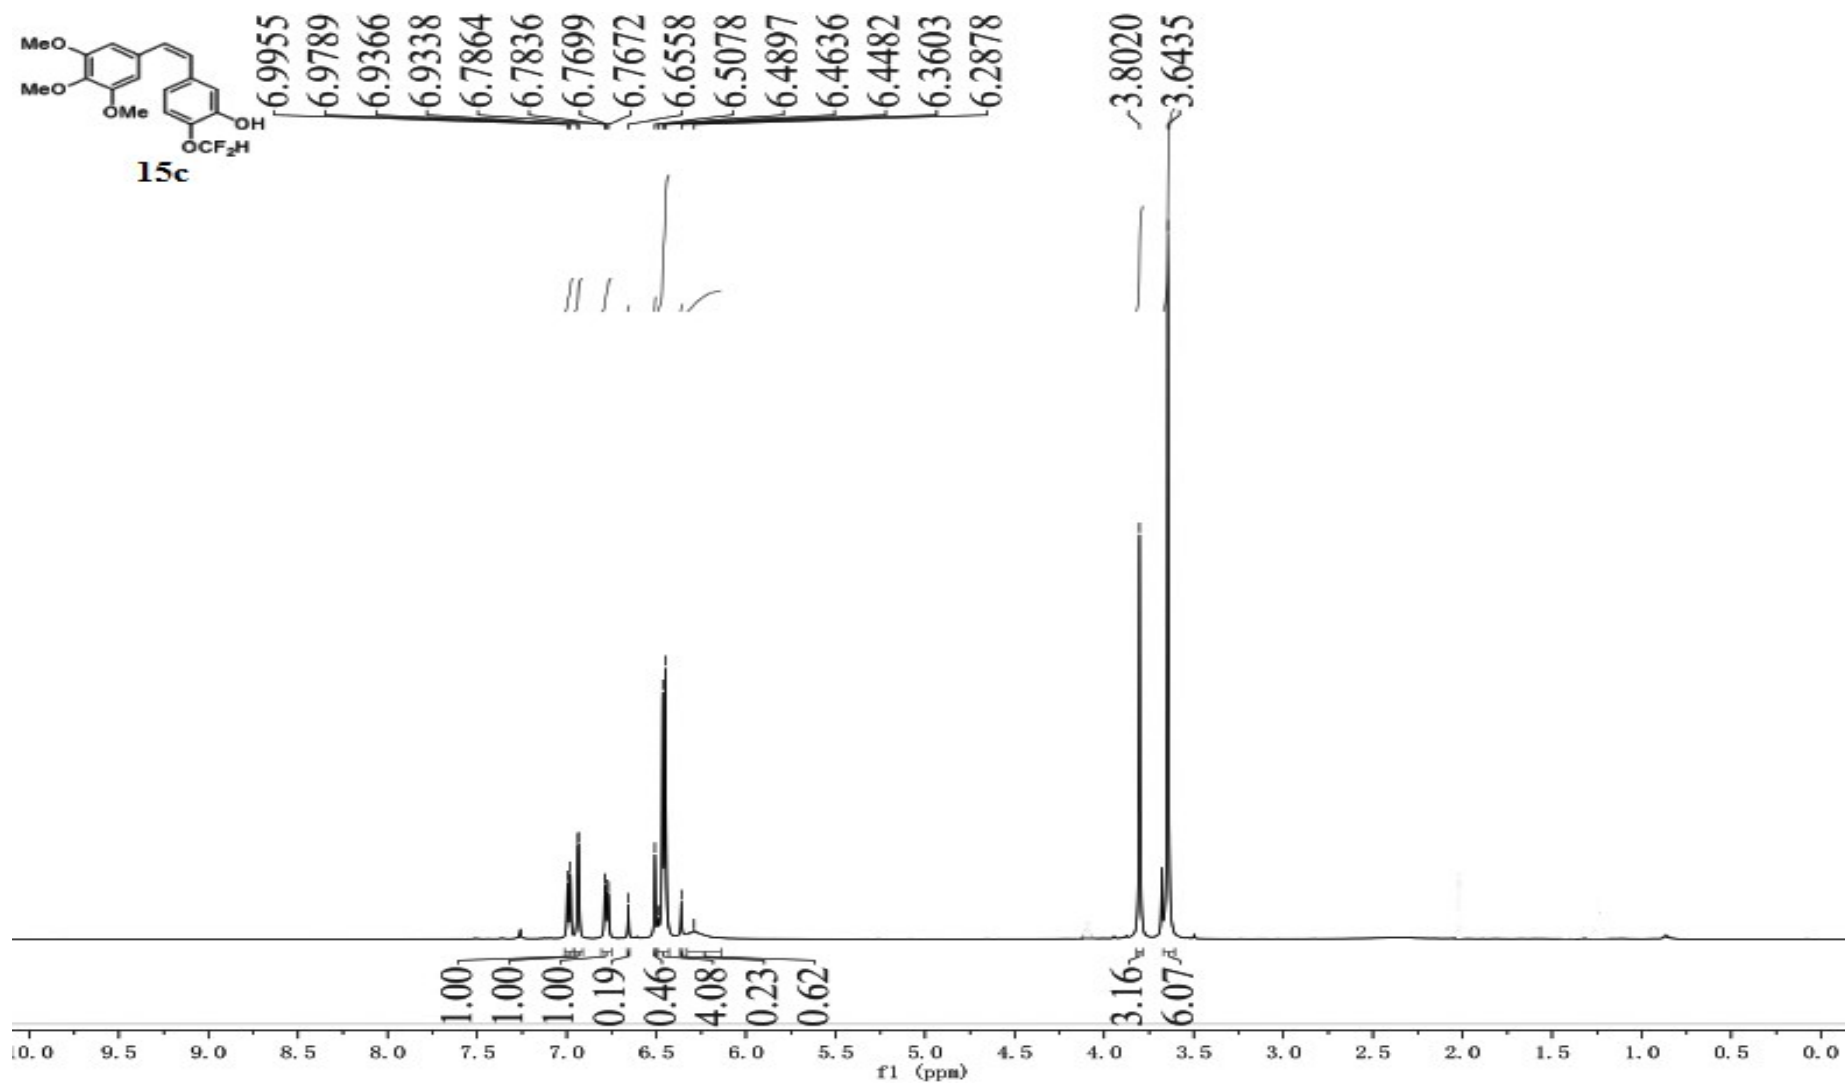

Compound 15c.  $^{19}\text{F}$  NMR,  $\text{CDCl}_3$ , 145 MHz

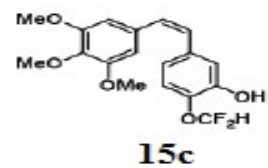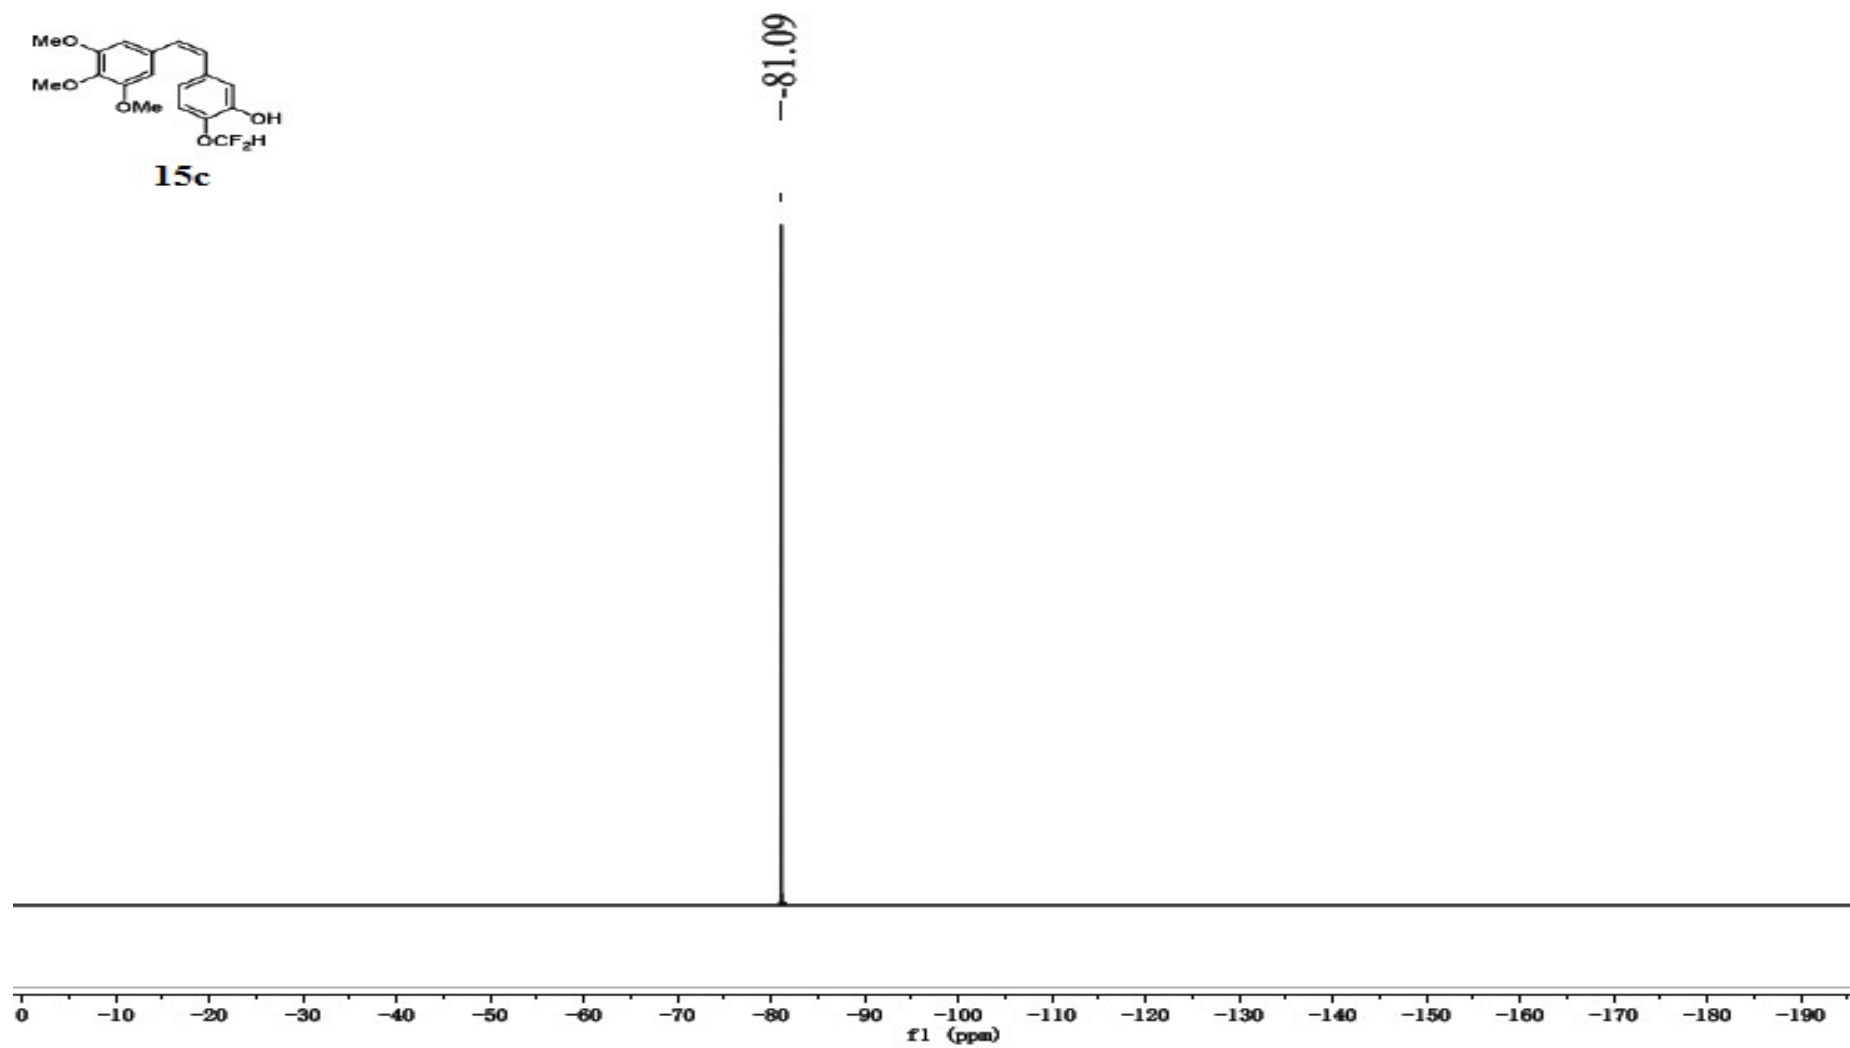

Compound 15c.  $^{13}\text{C}$  NMR,  $\text{CDCl}_3$ , 125 MHz

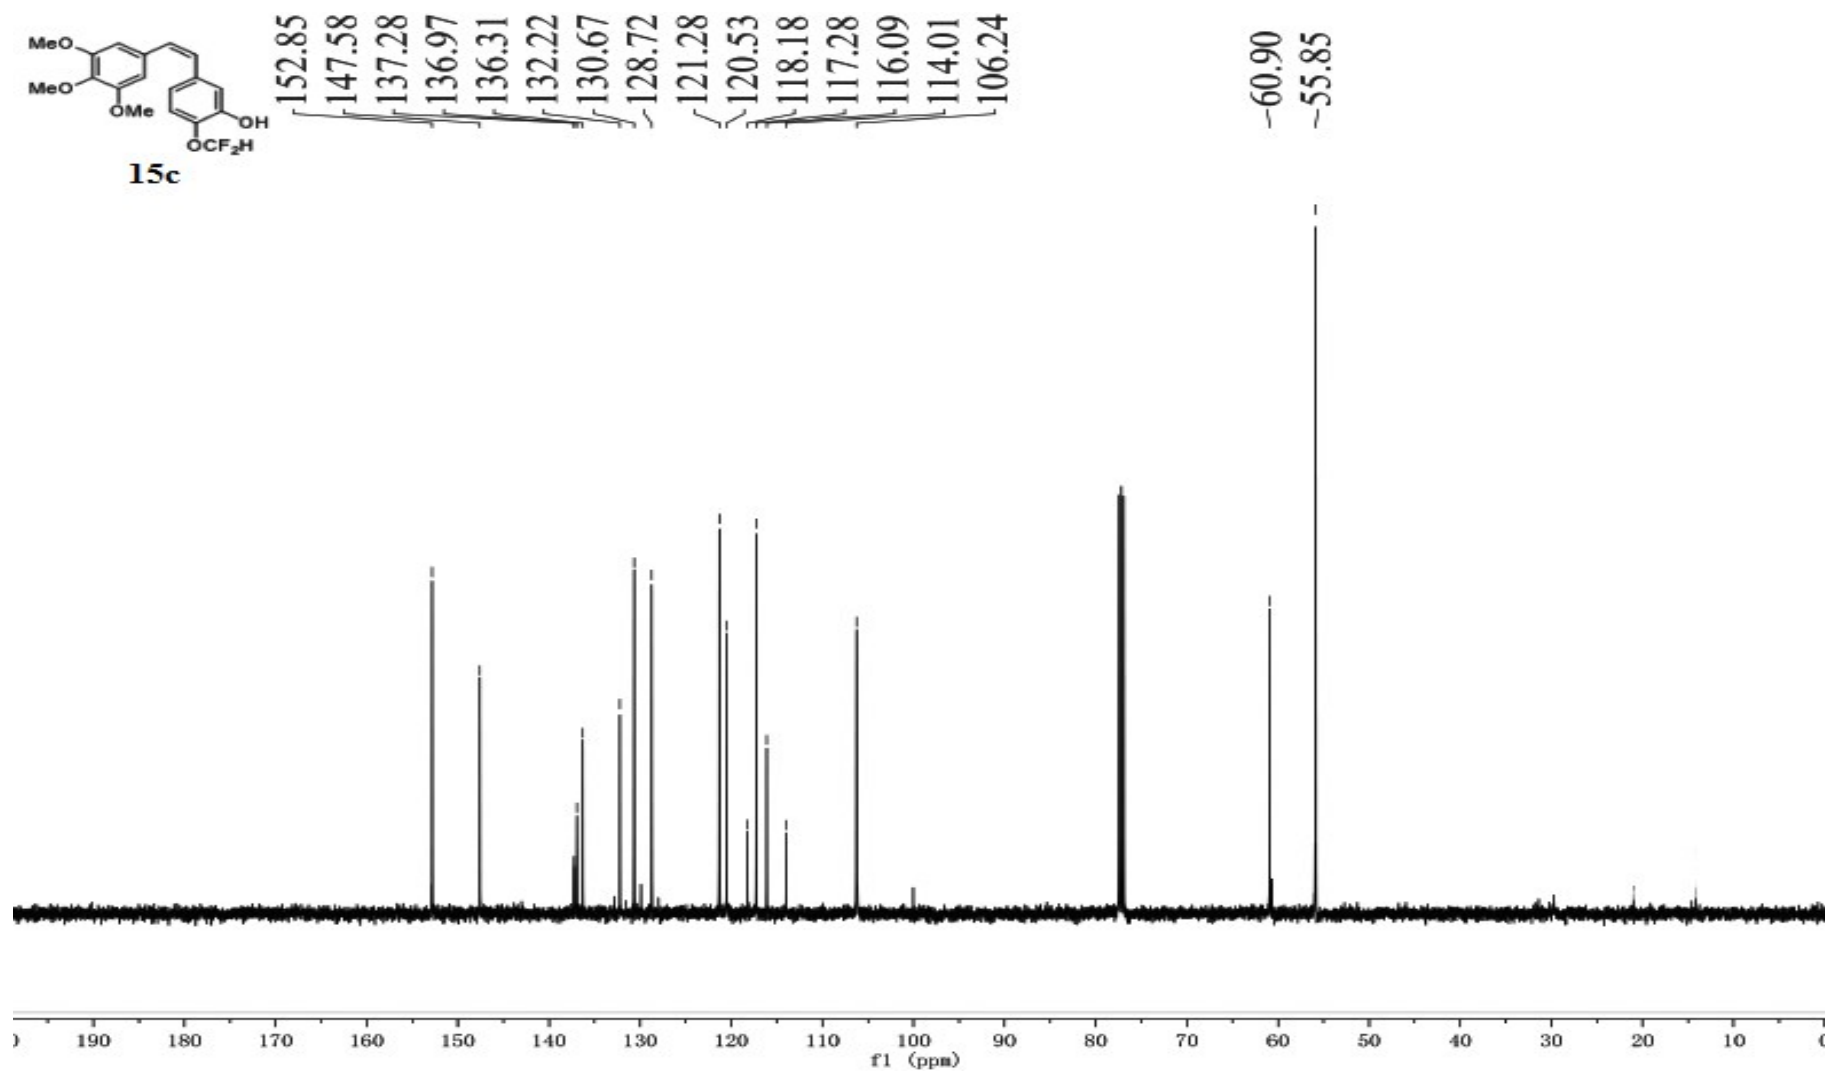

Compound 15d.  $^1\text{H}$  NMR,  $\text{CDCl}_3$ , 500 MHz

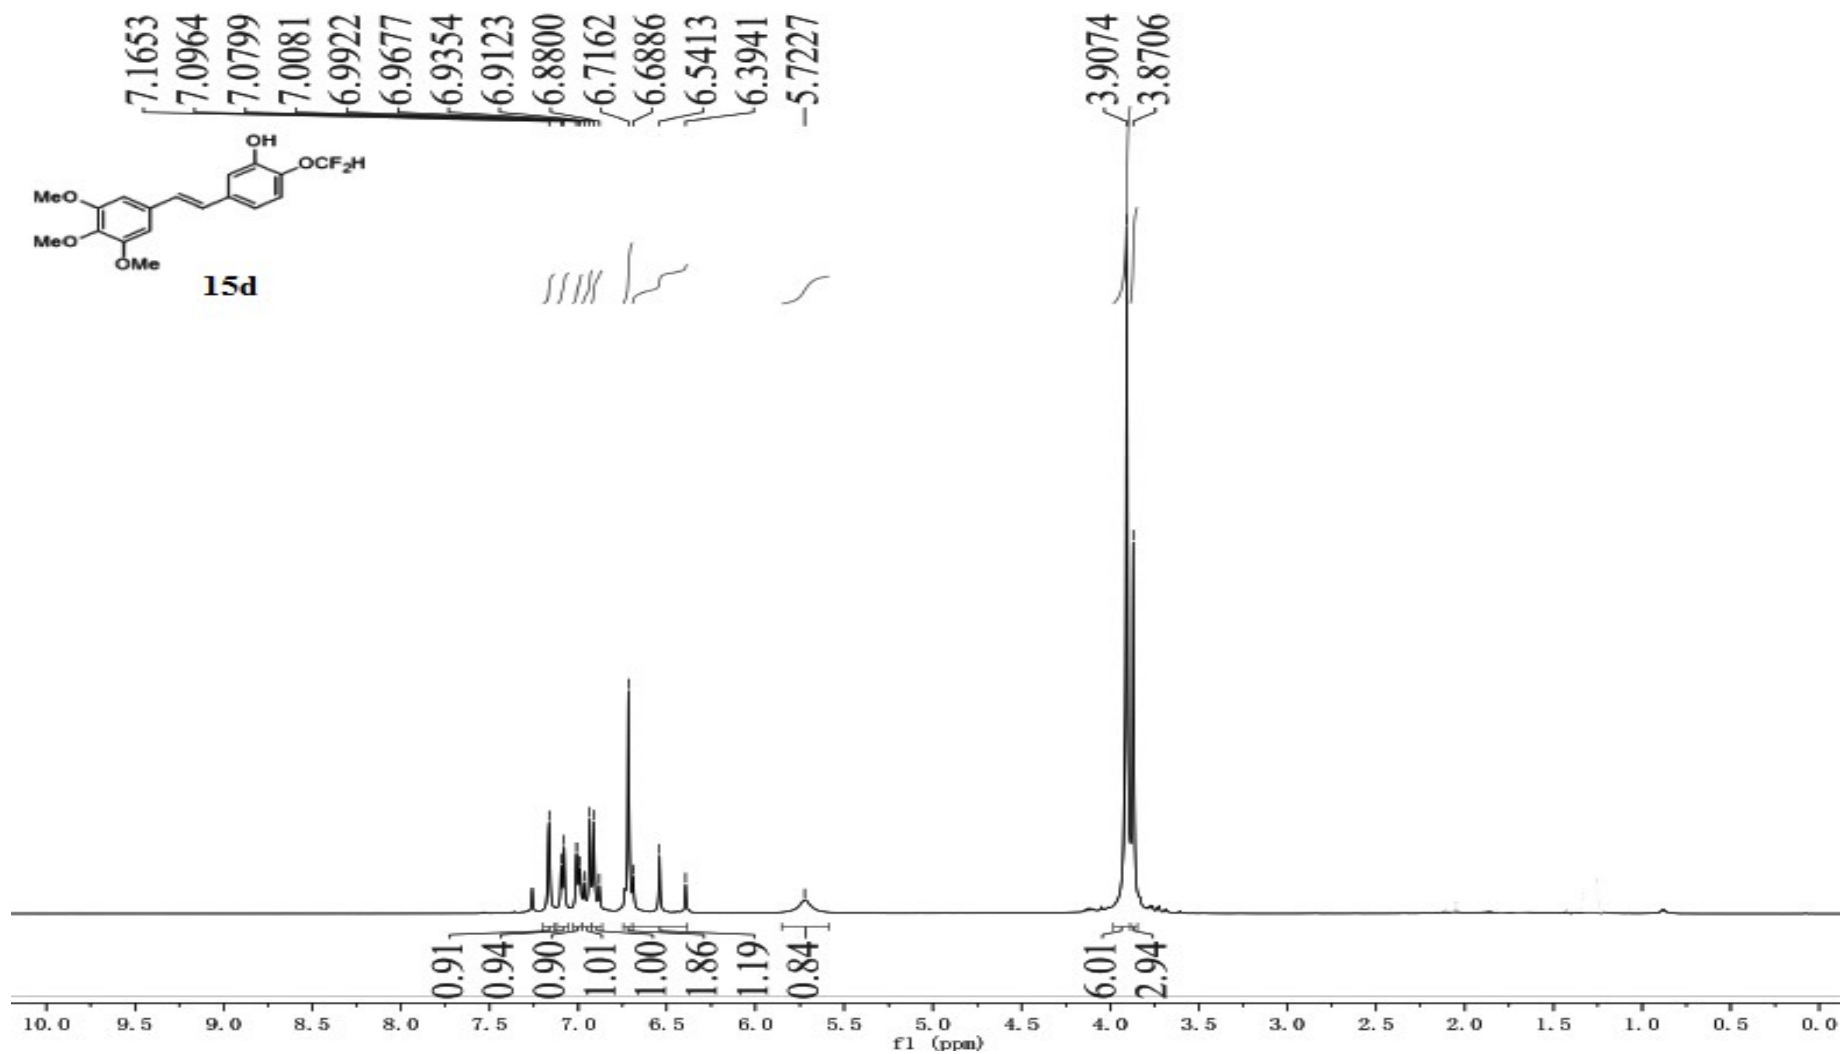

Compound 15d.  $^{19}\text{F}$  NMR,  $\text{CDCl}_3$ , 145 MHz

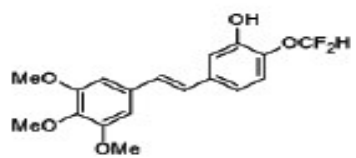

15d

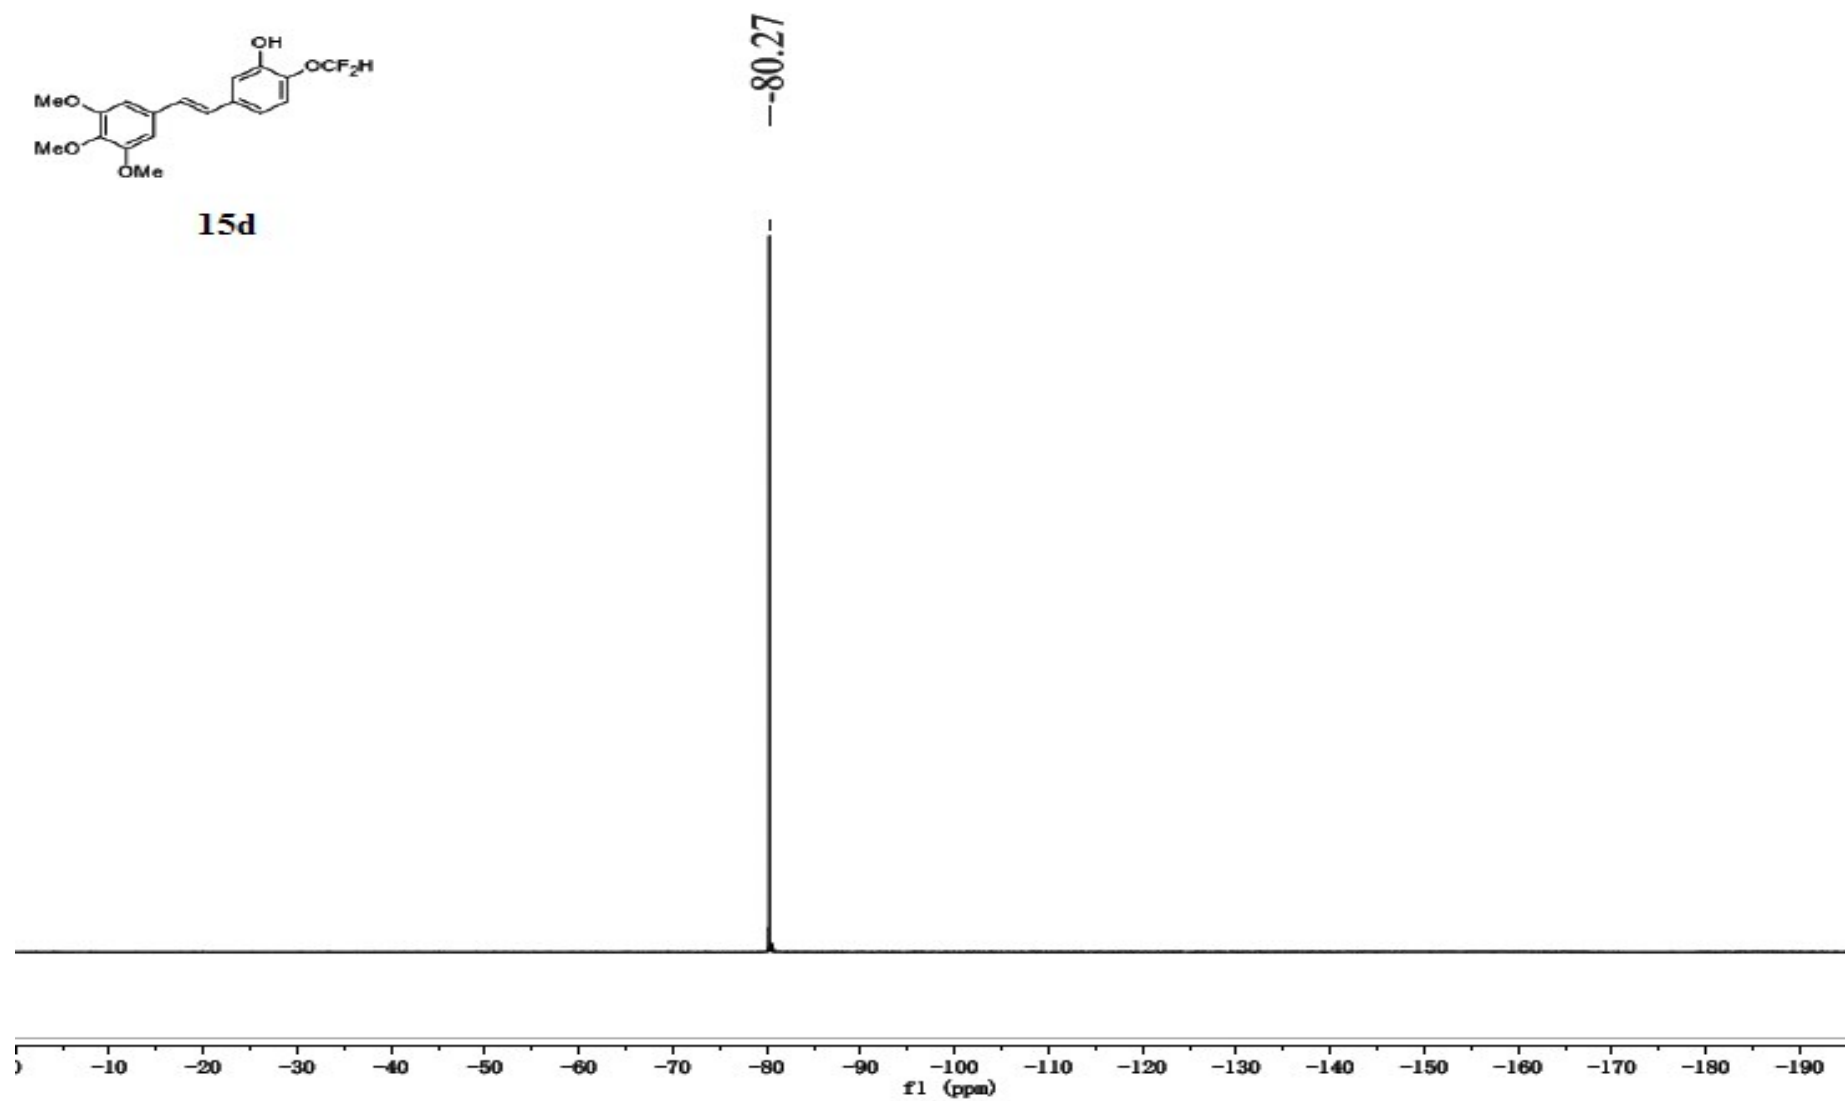

Compound 15d.  $^{13}\text{C}$  NMR,  $\text{CDCl}_3$ , 125 MHz

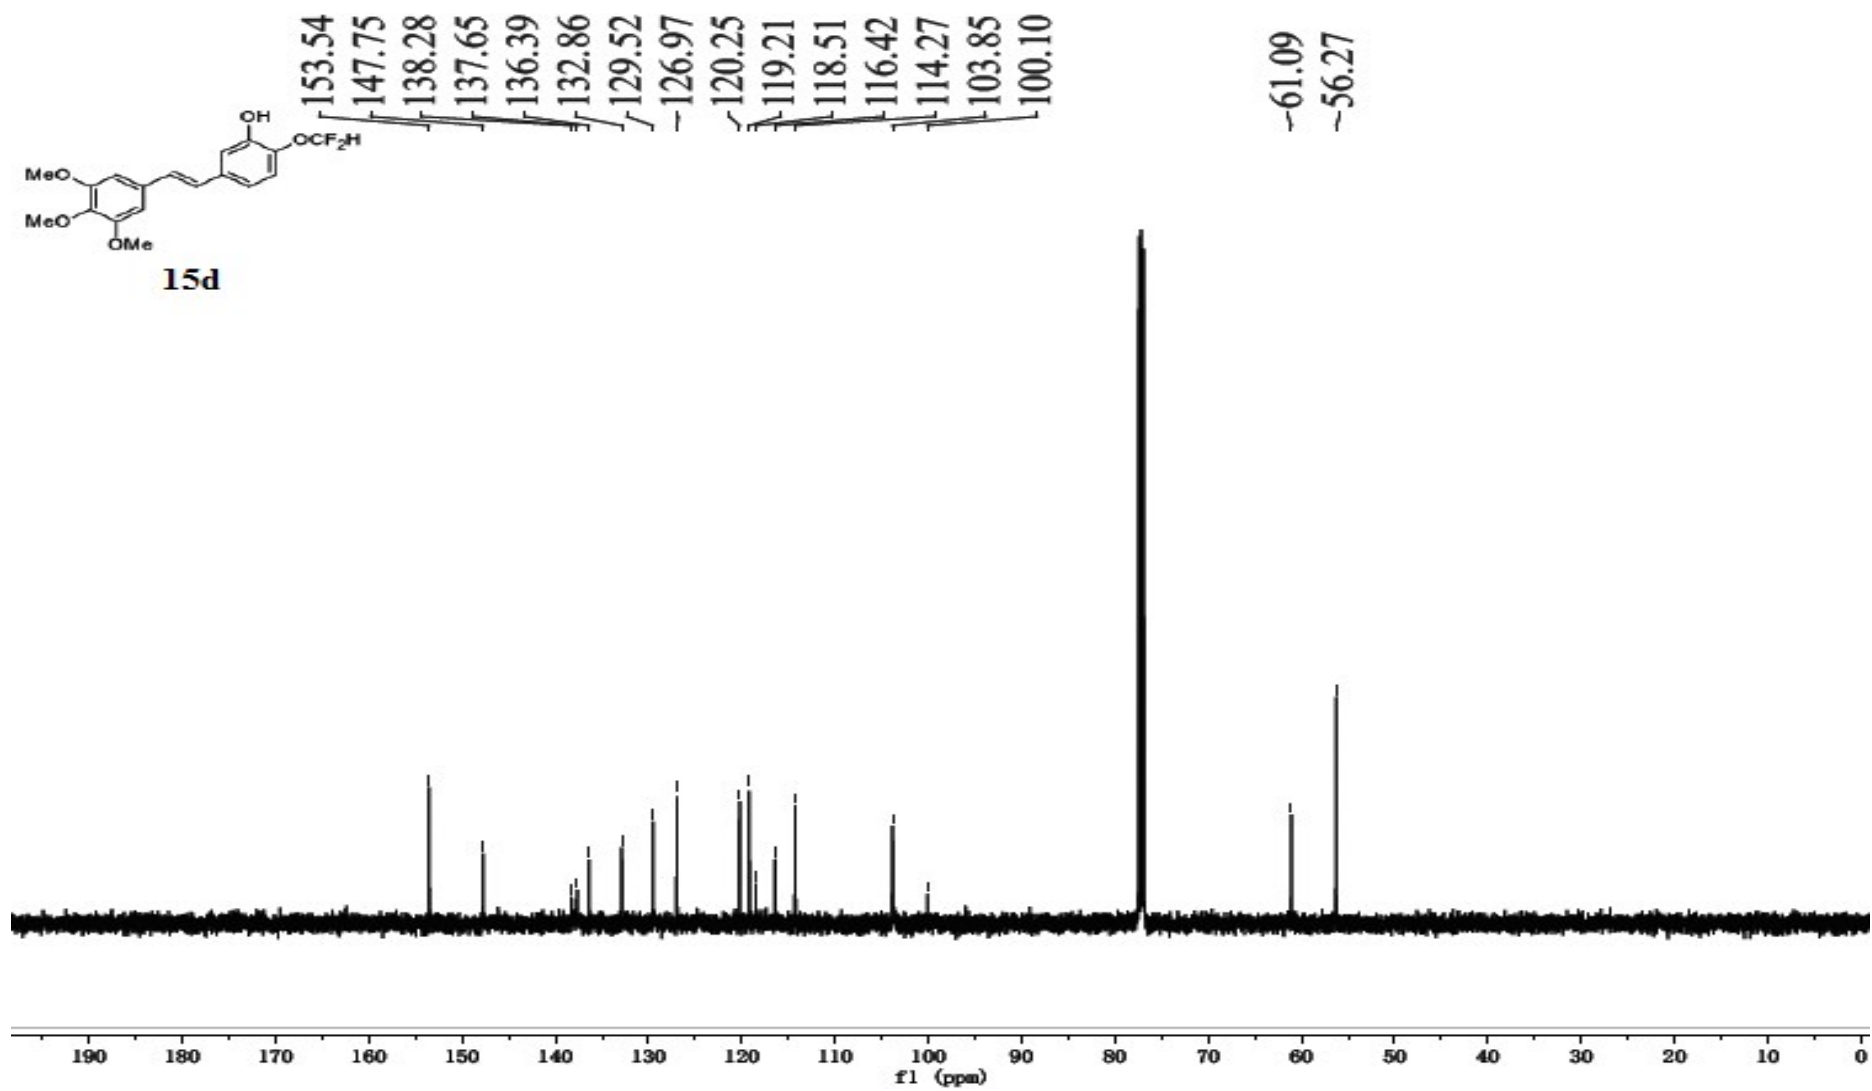

Compound 15e.  $^1\text{H}$  NMR,  $\text{CDCl}_3$ , 500 MHz

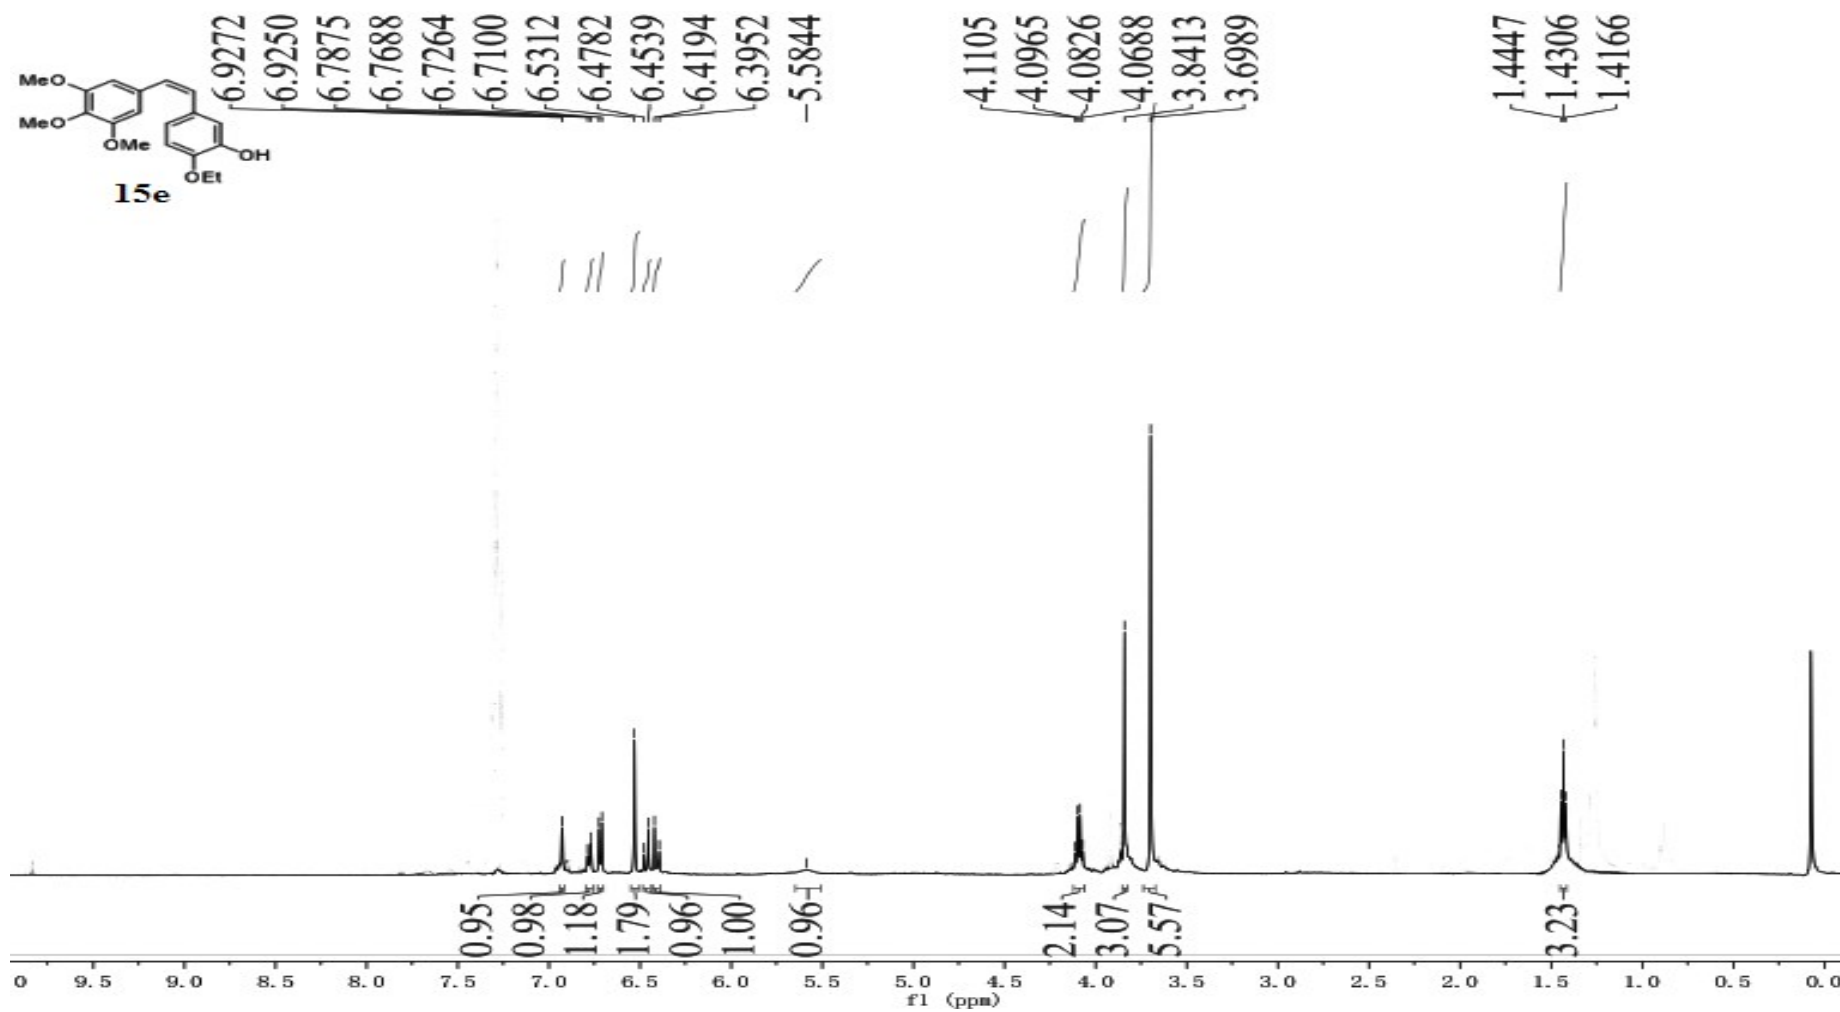

Compound 15e.  $^{13}\text{C}$  NMR,  $\text{CDCl}_3$ , 125 MHz

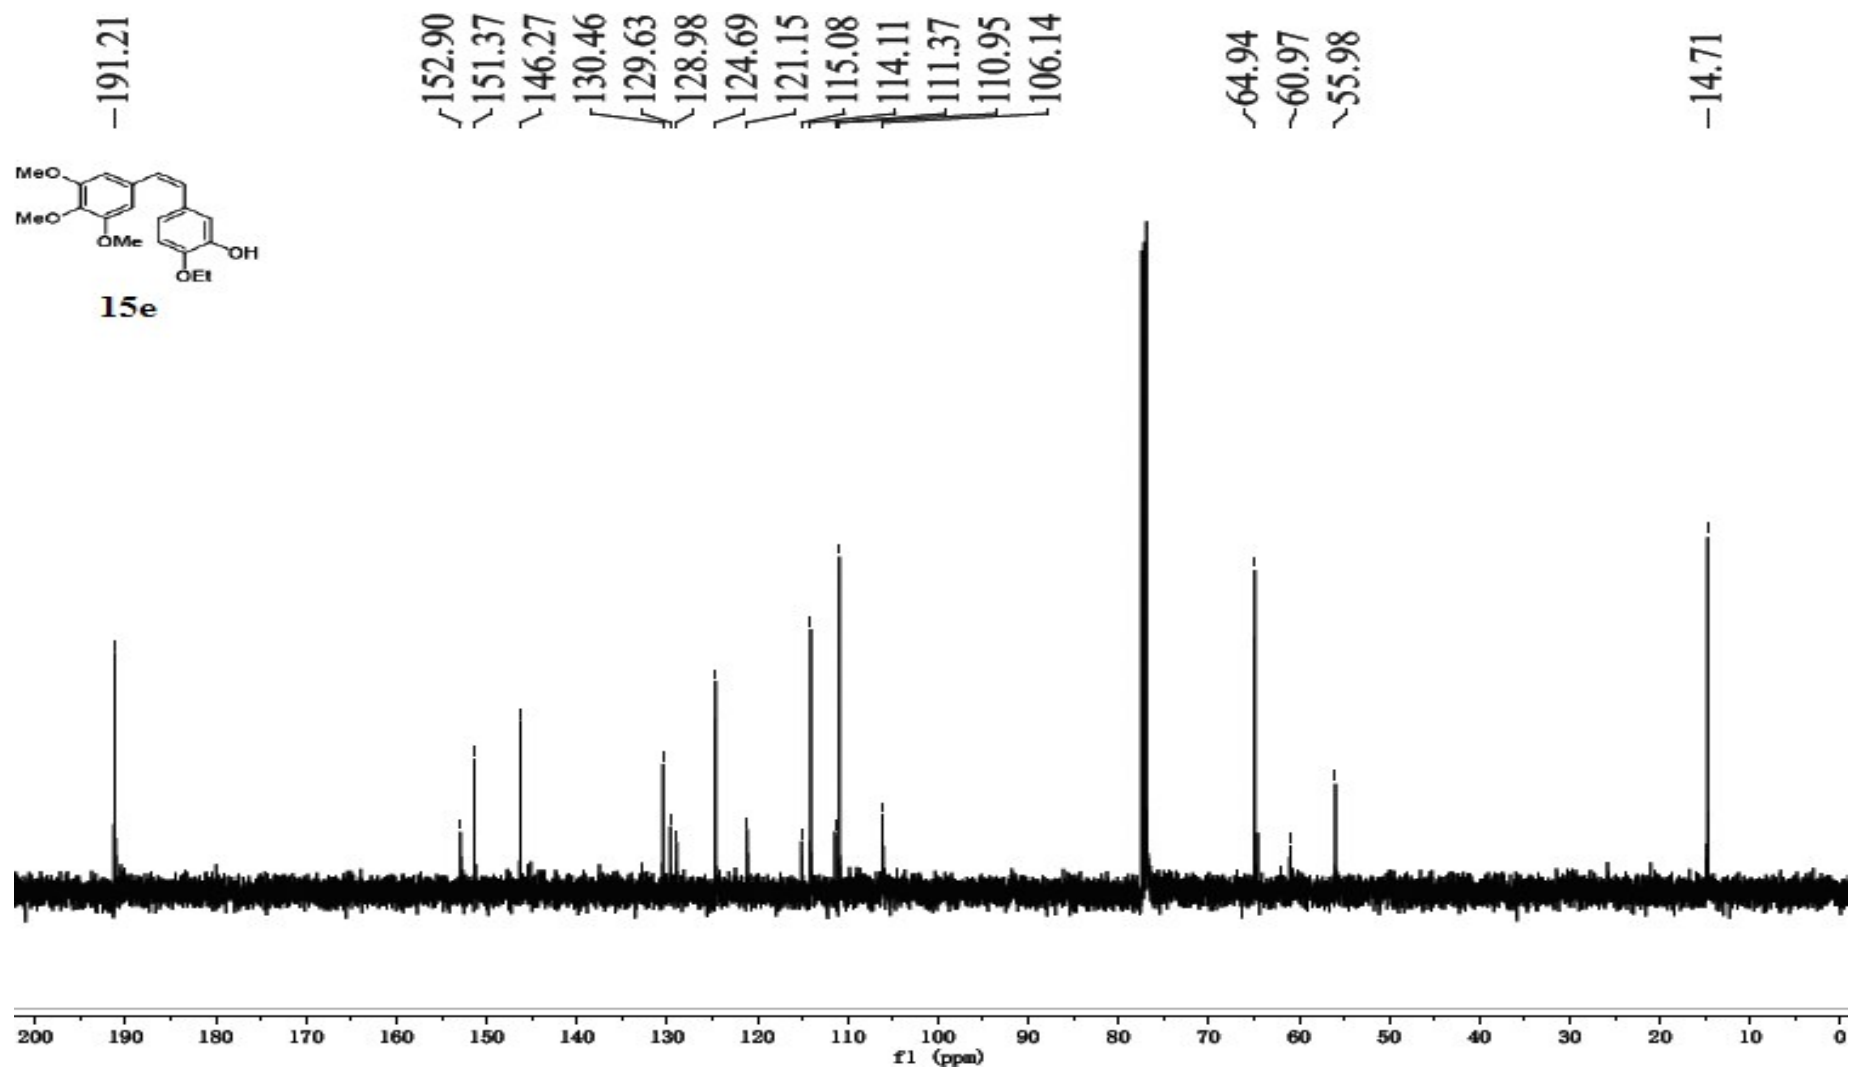

Compound **15f**. <sup>1</sup>H NMR, CDCl<sub>3</sub>, 500 MHz



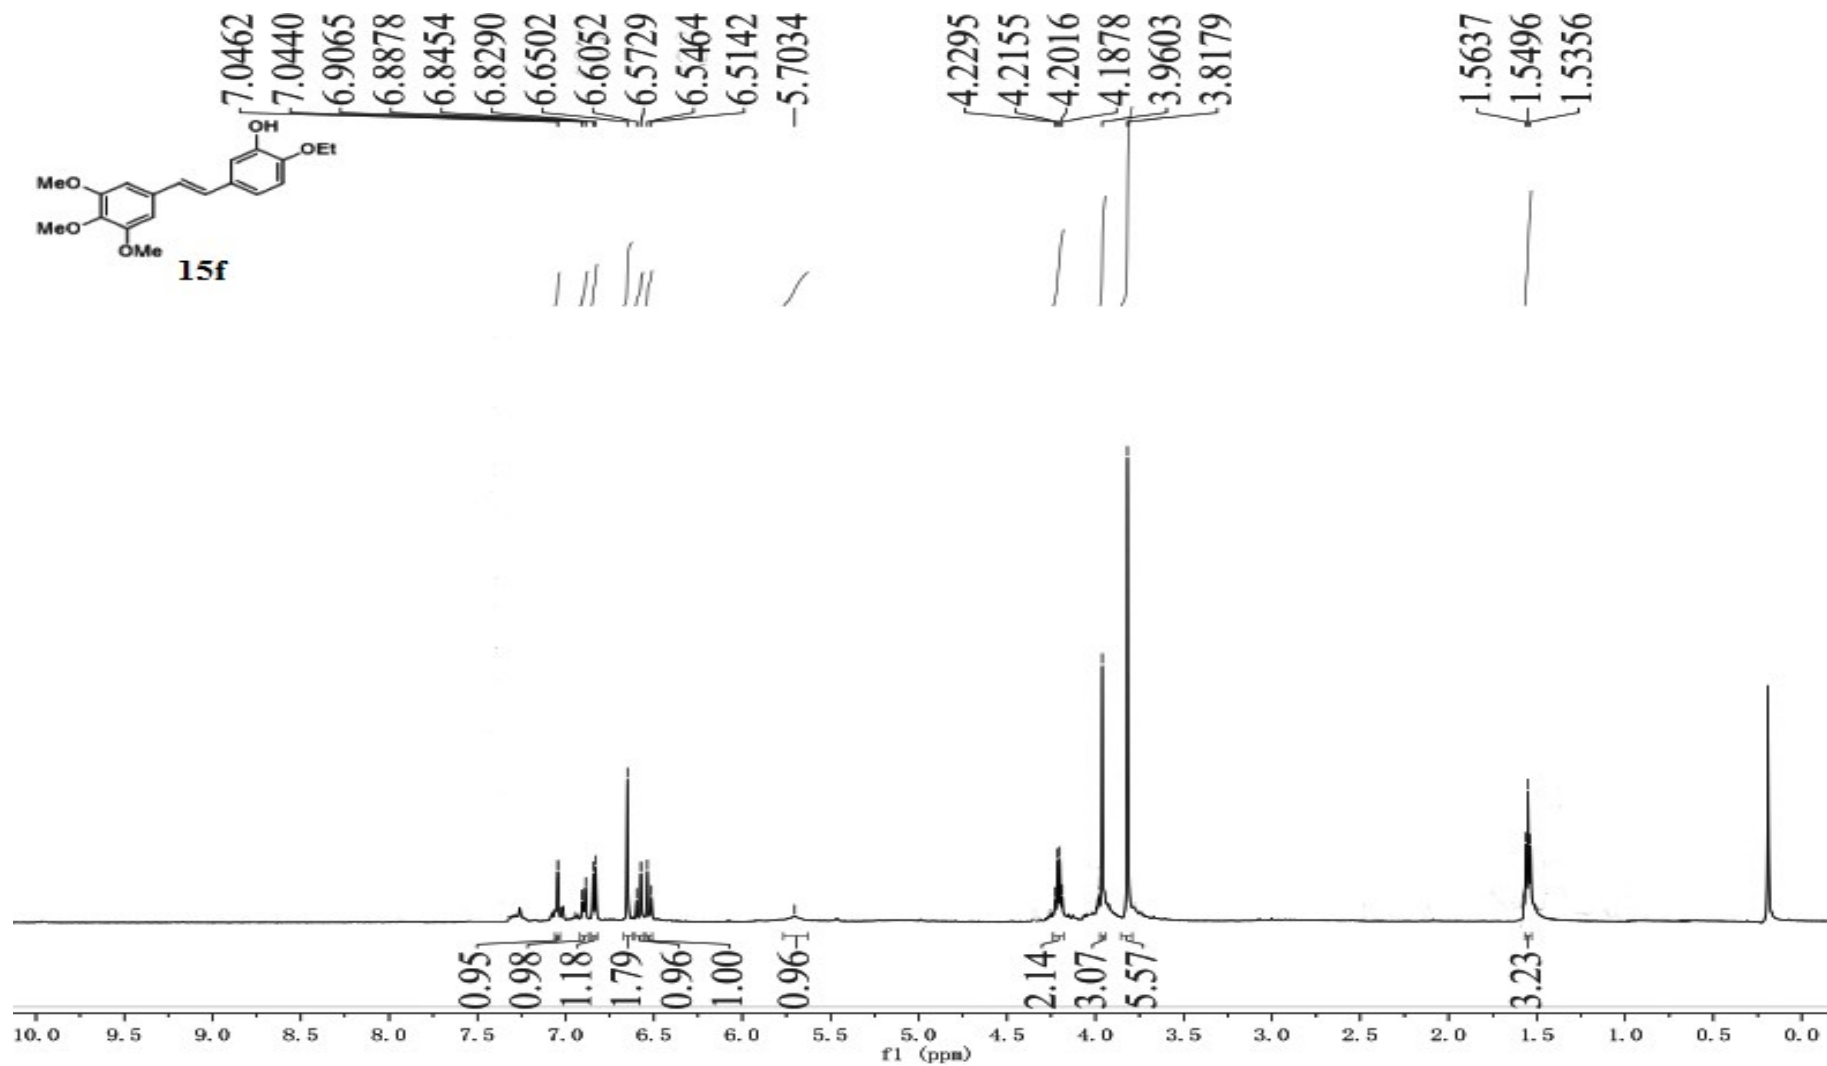

Compound **15f**. <sup>13</sup>C NMR, CDCl<sub>3</sub>, 125 MHz

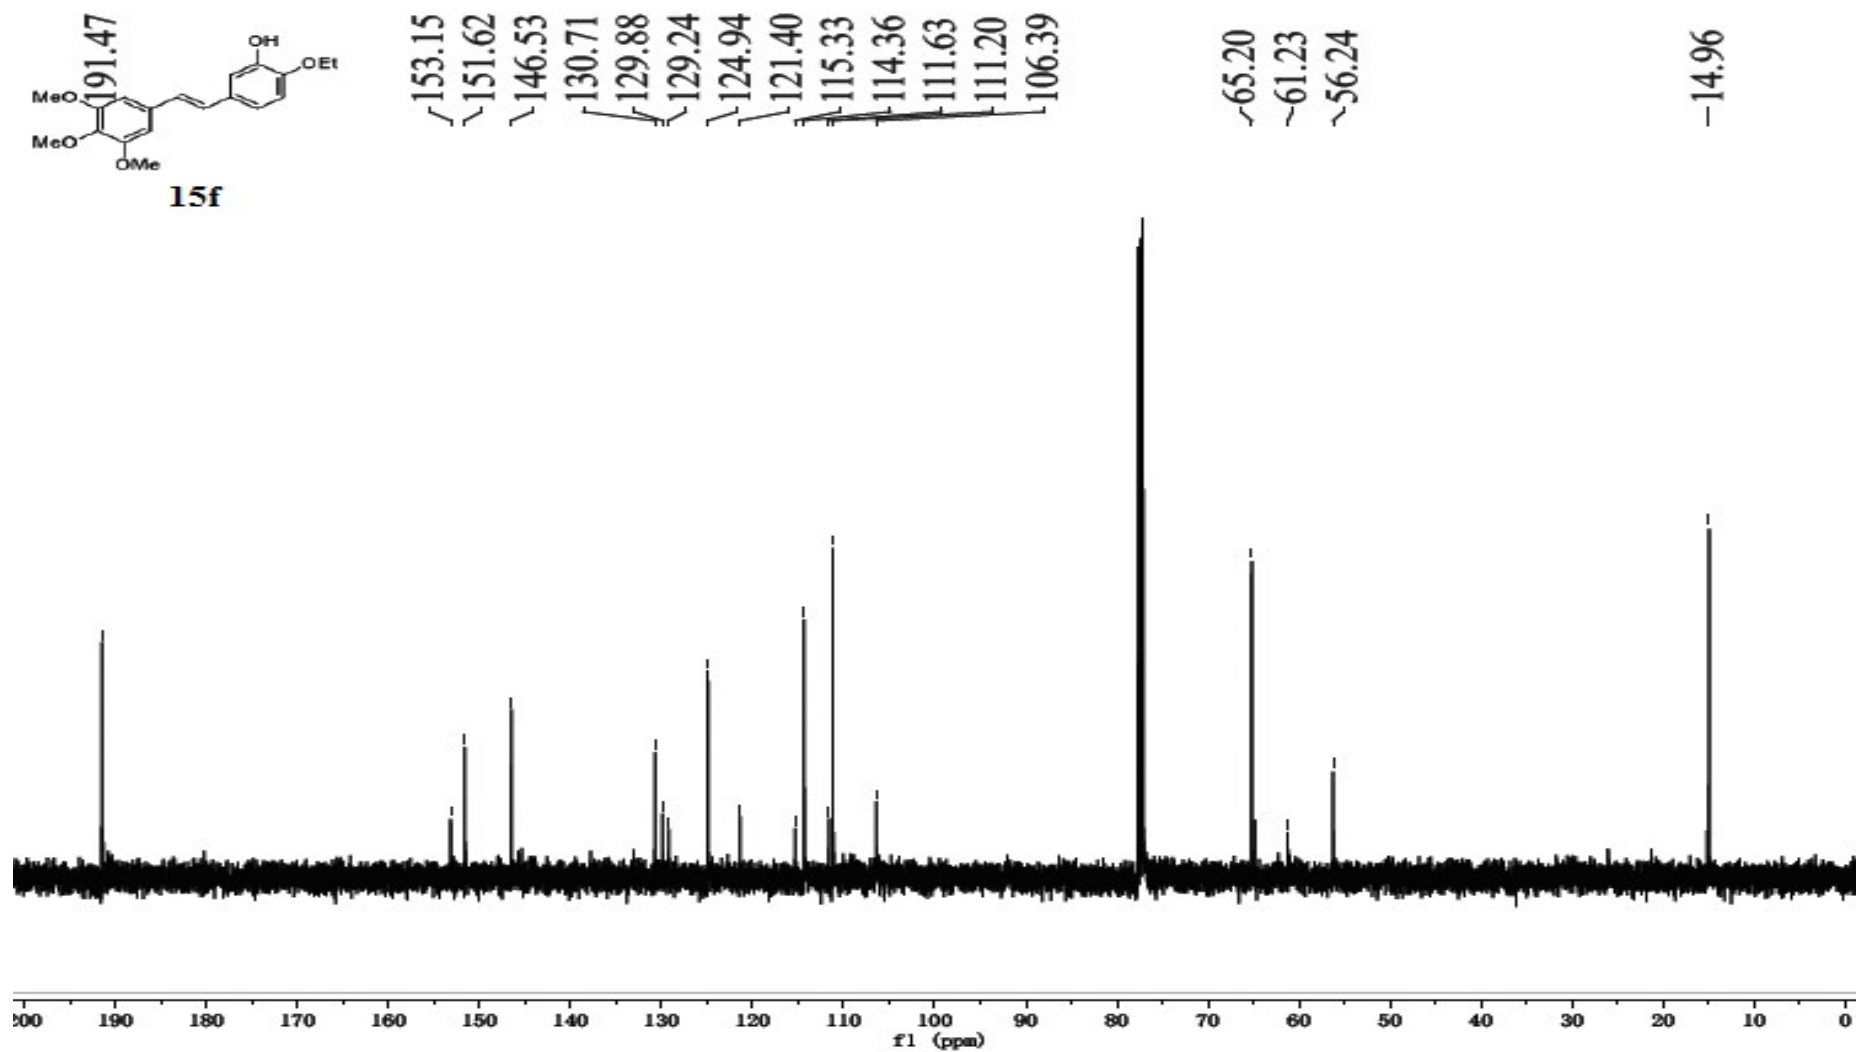

Compound **15g**.  $^1\text{H}$  NMR,  $\text{CDCl}_3$ , 500 MHz

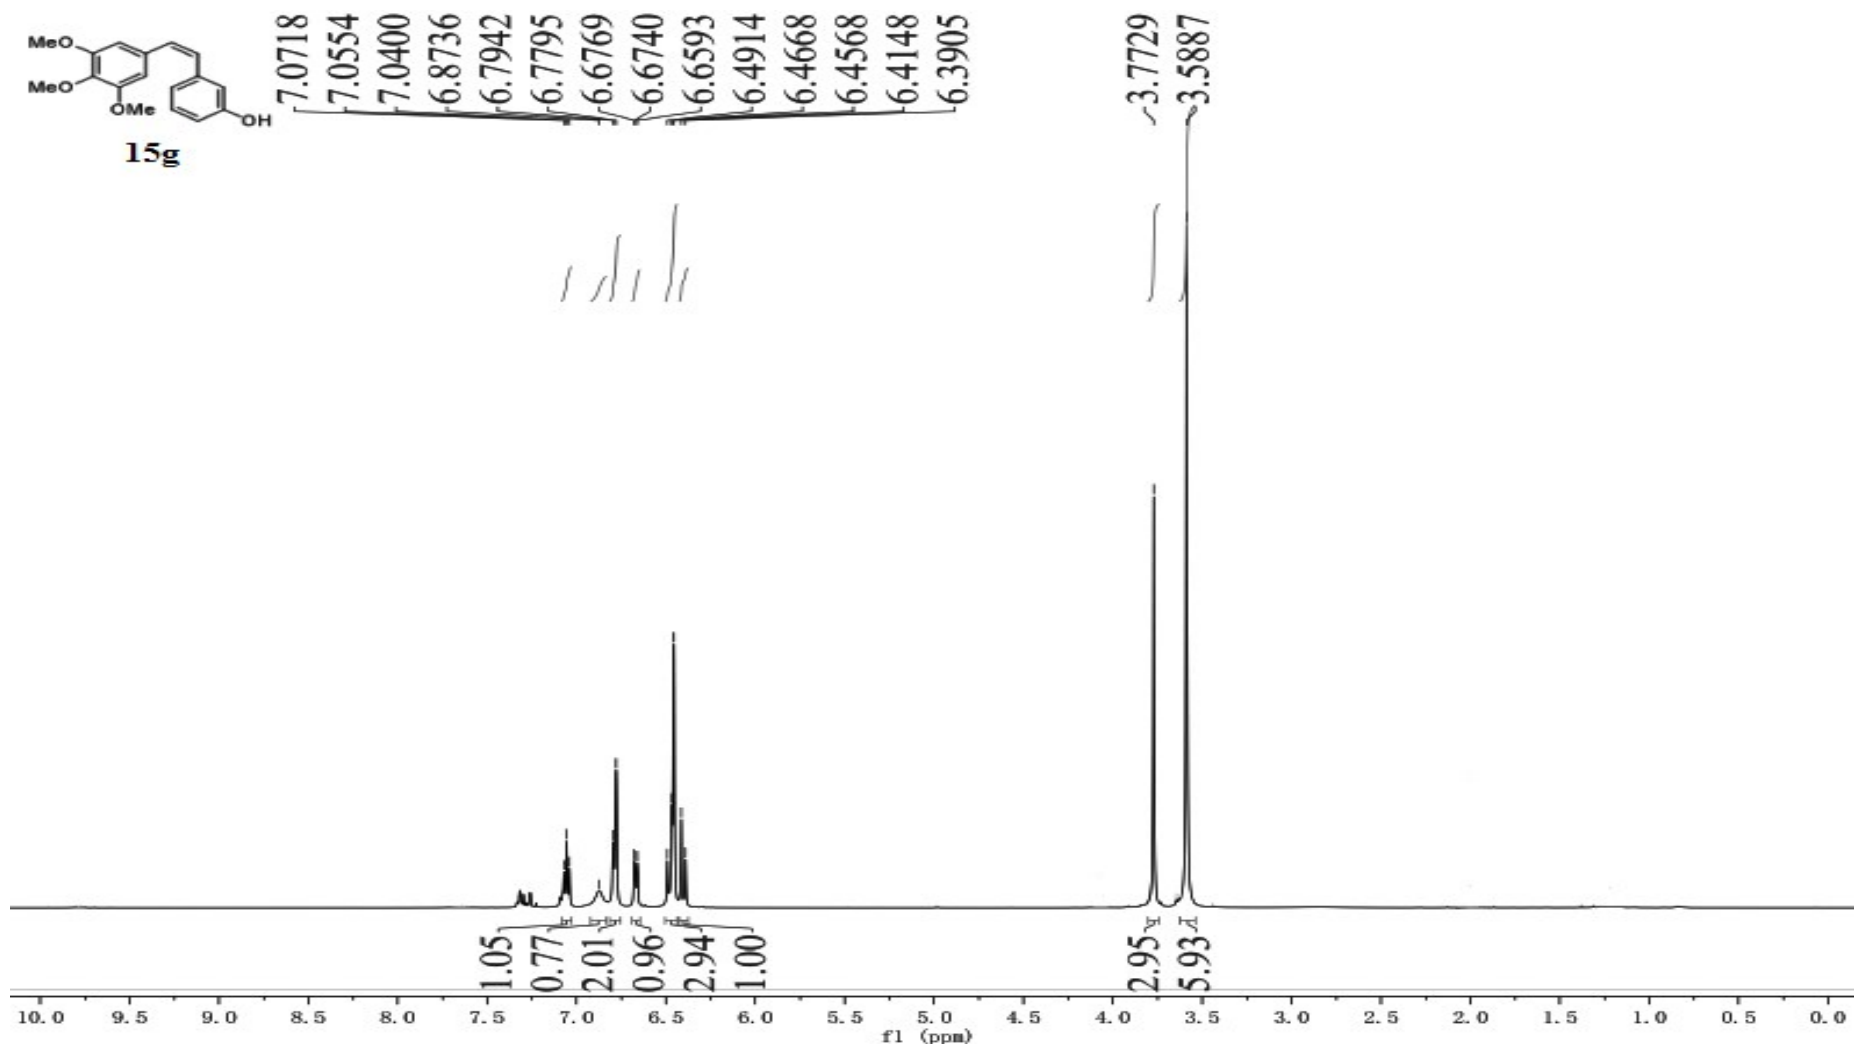

**Compound 15g.**  $^{13}\text{C}$  NMR,  $\text{CDCl}_3$ , 125 MHz

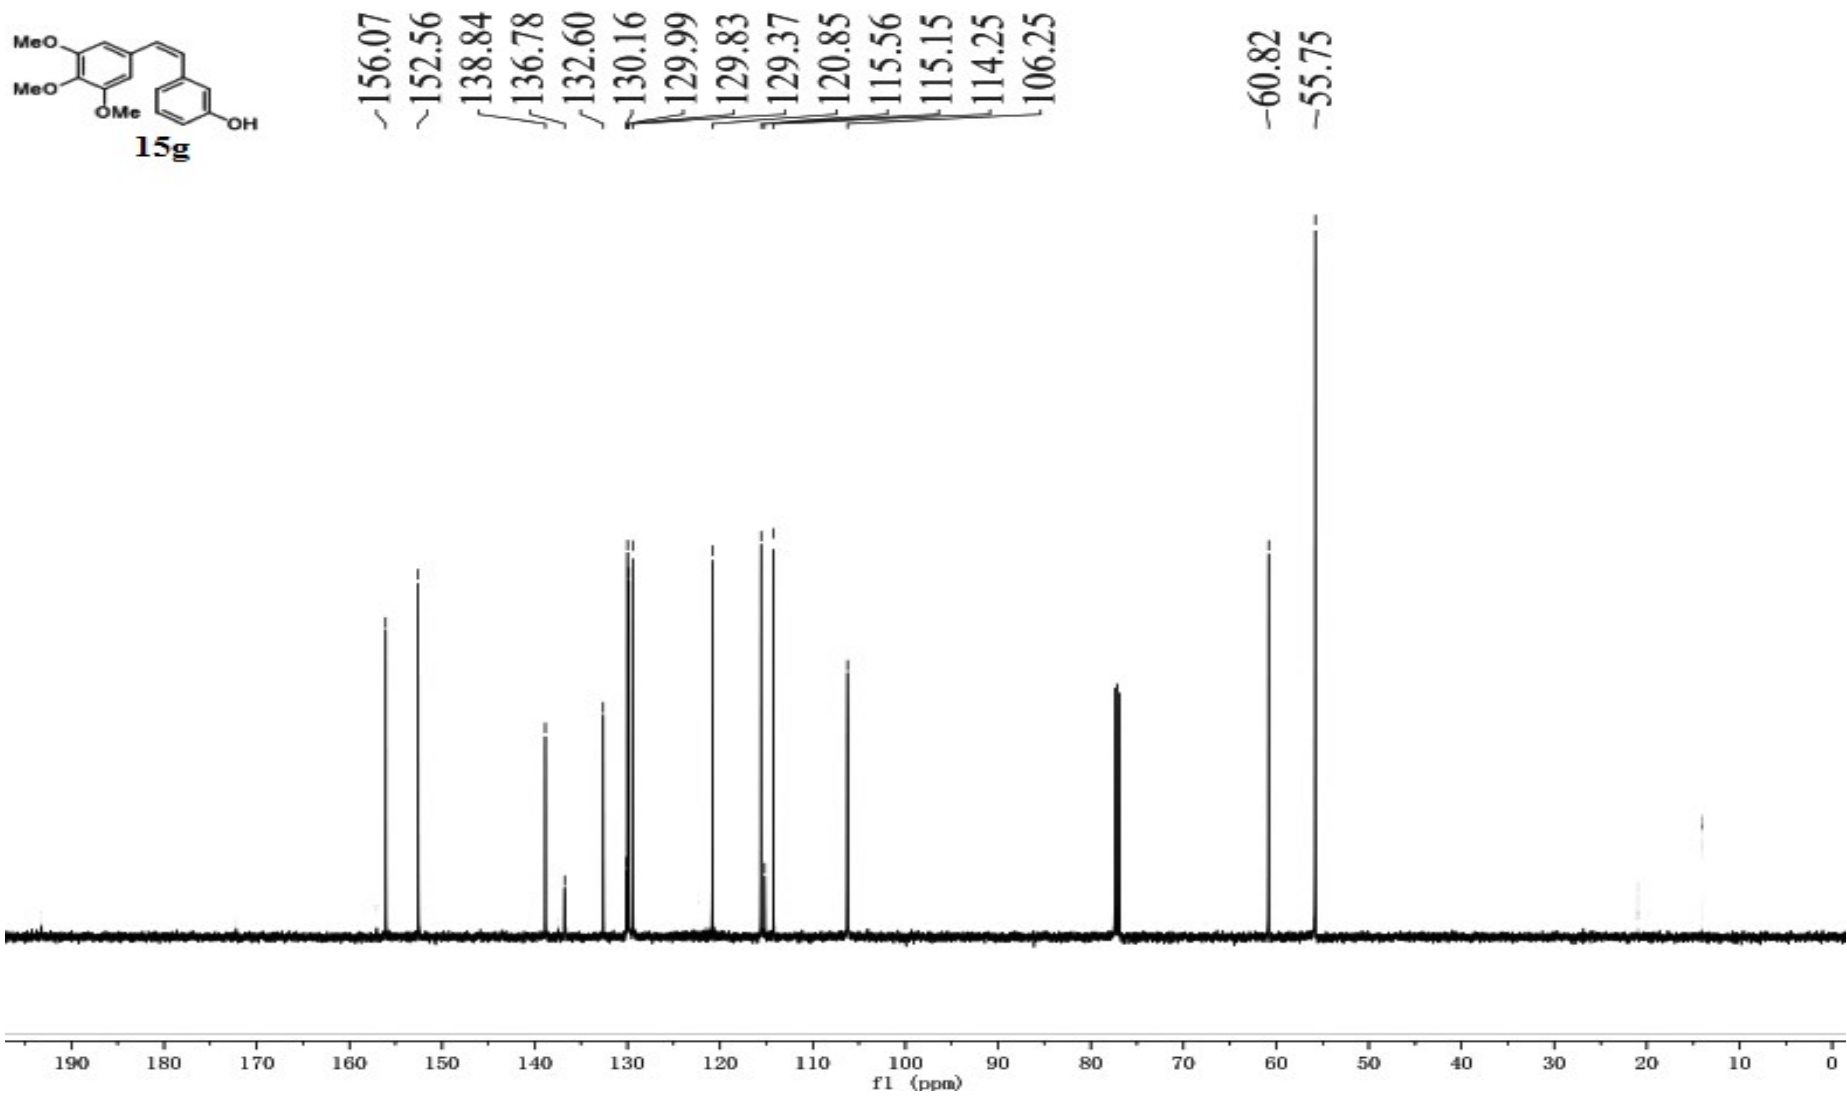

Compound 15h. <sup>1</sup>H NMR, CDCl<sub>3</sub>, 500 MHz

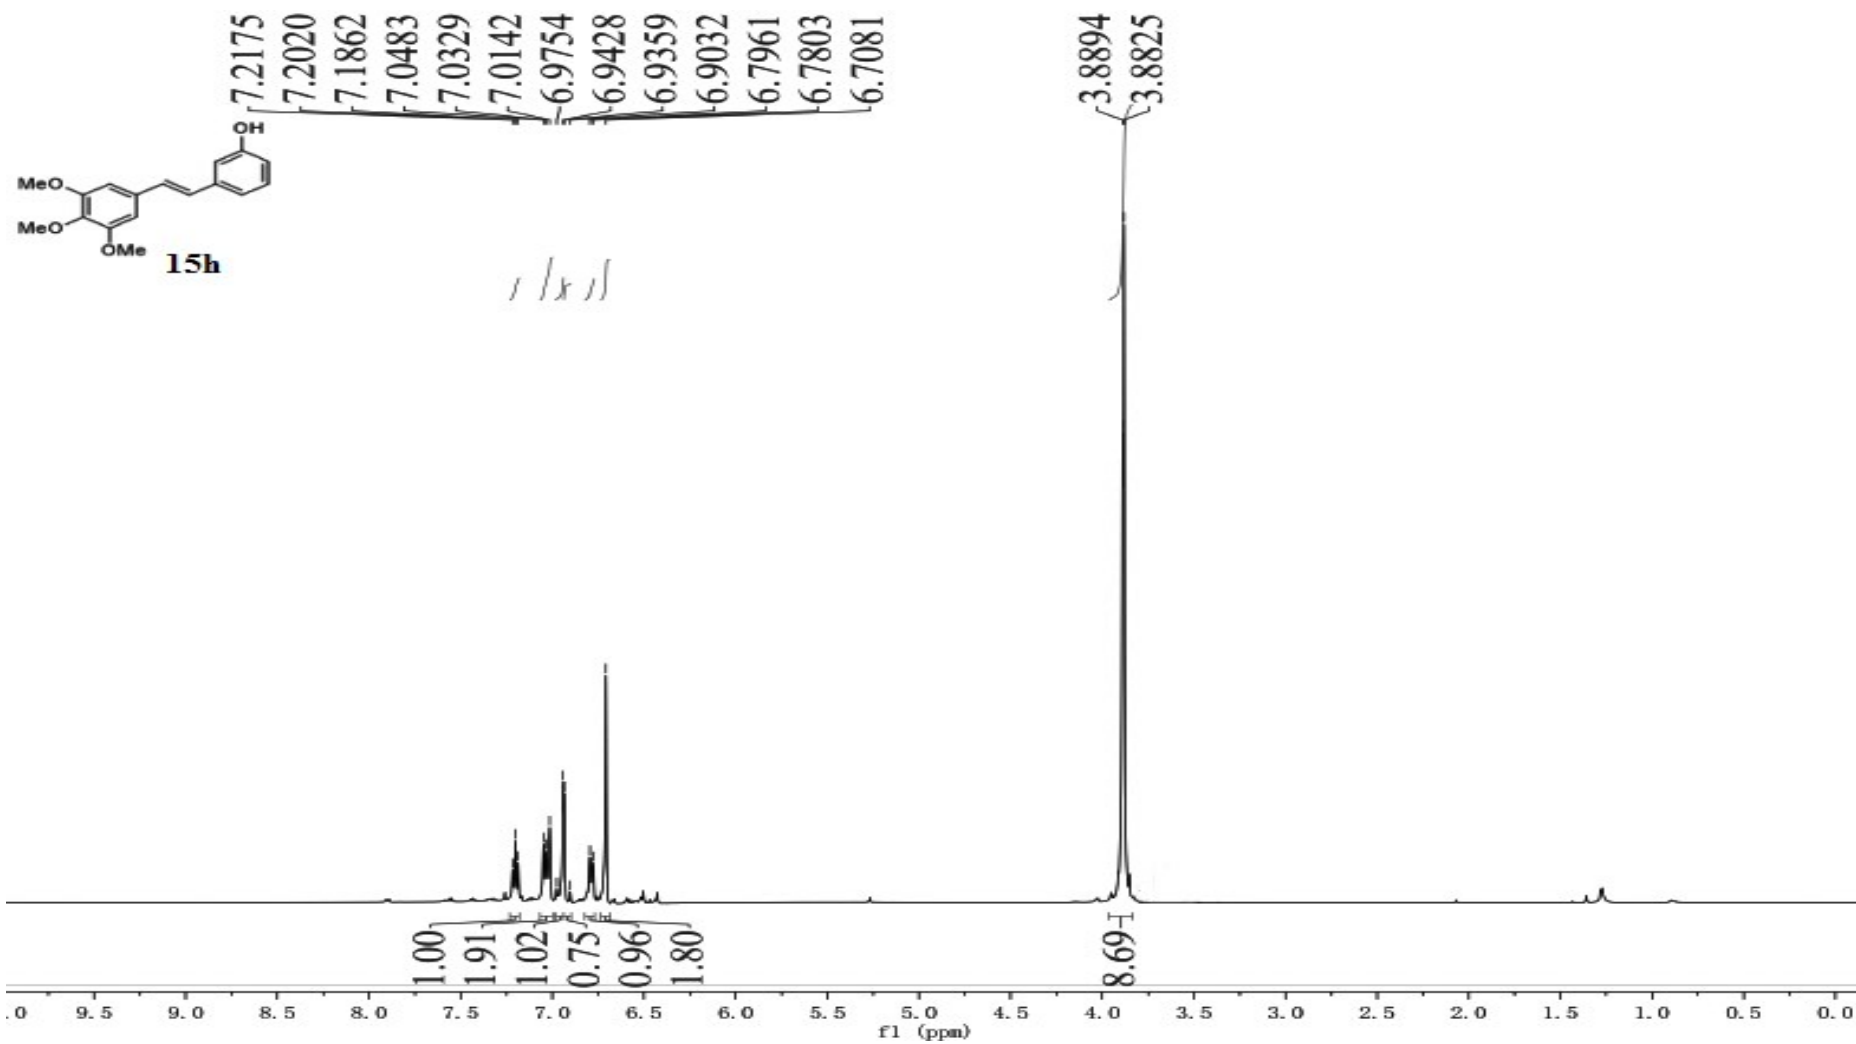

**Compound 15h.** <sup>13</sup>C NMR, CDCl<sub>3</sub>, 125 MHz

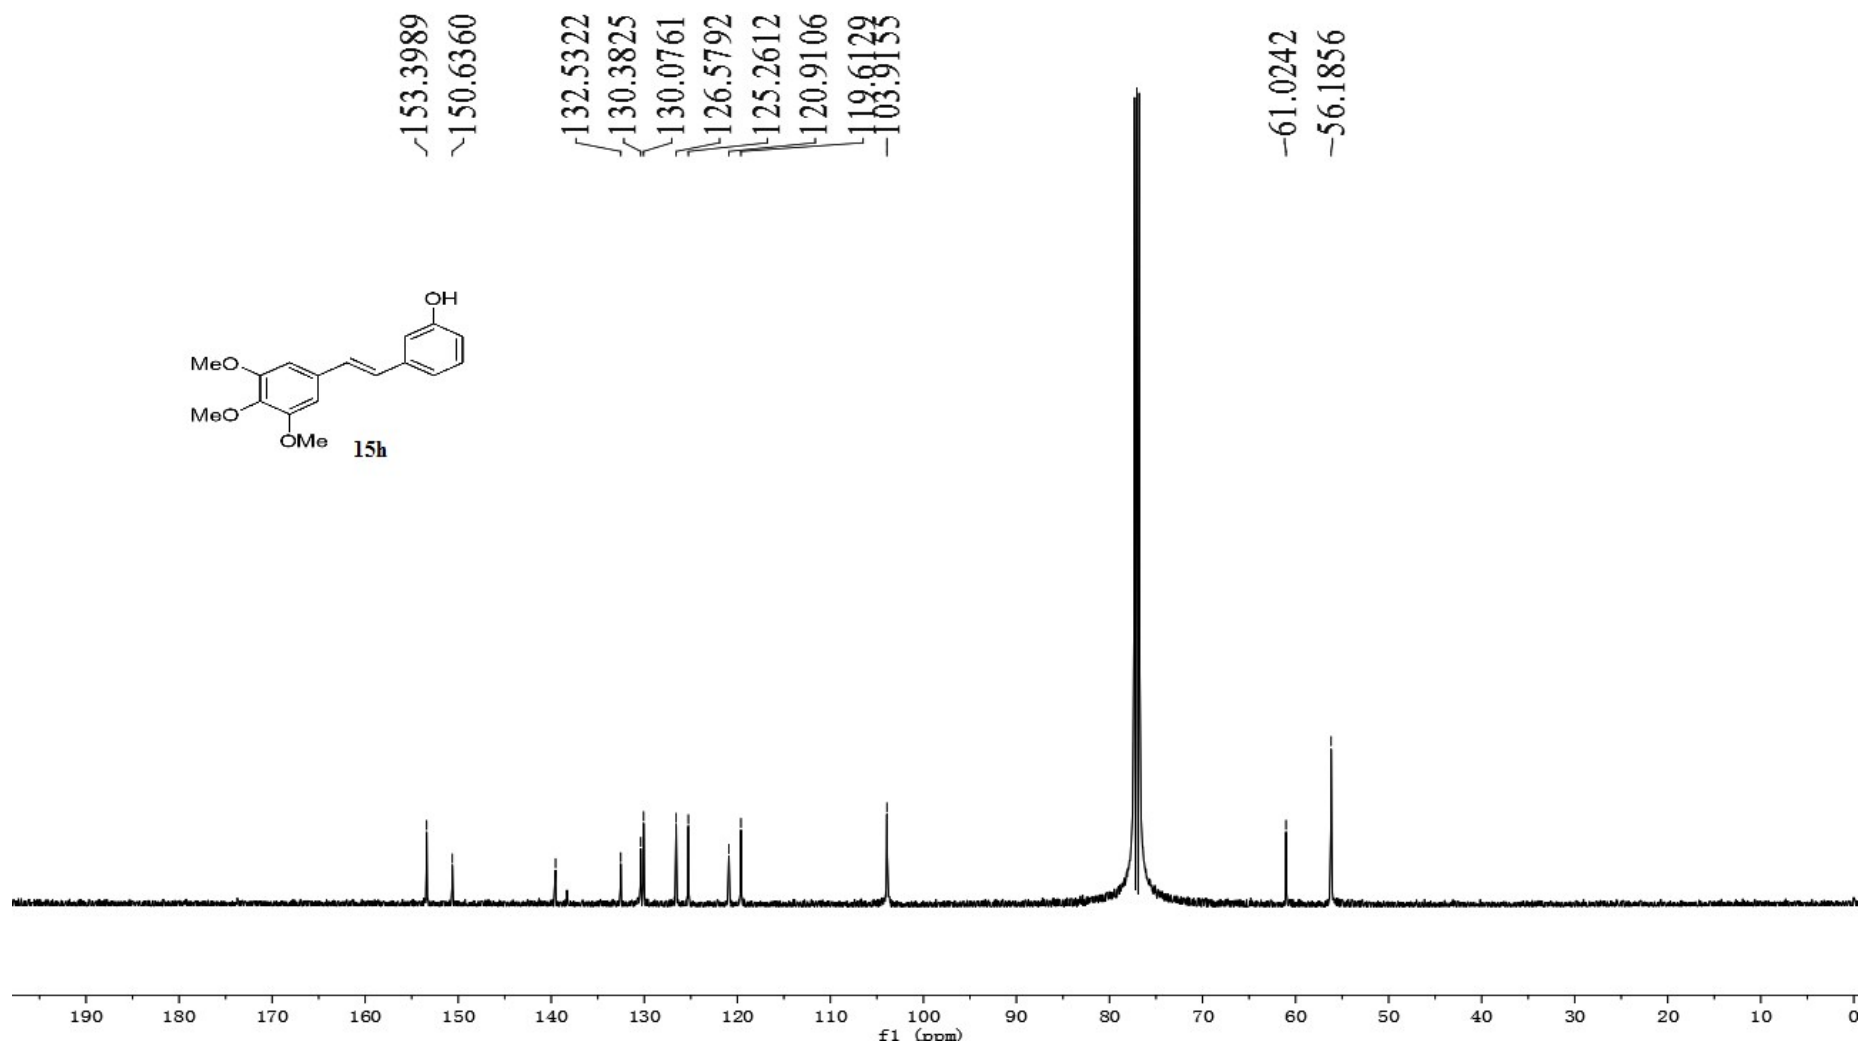

Compound 16a.  $^1\text{H}$  NMR,  $\text{CDCl}_3$ , 500 MHz

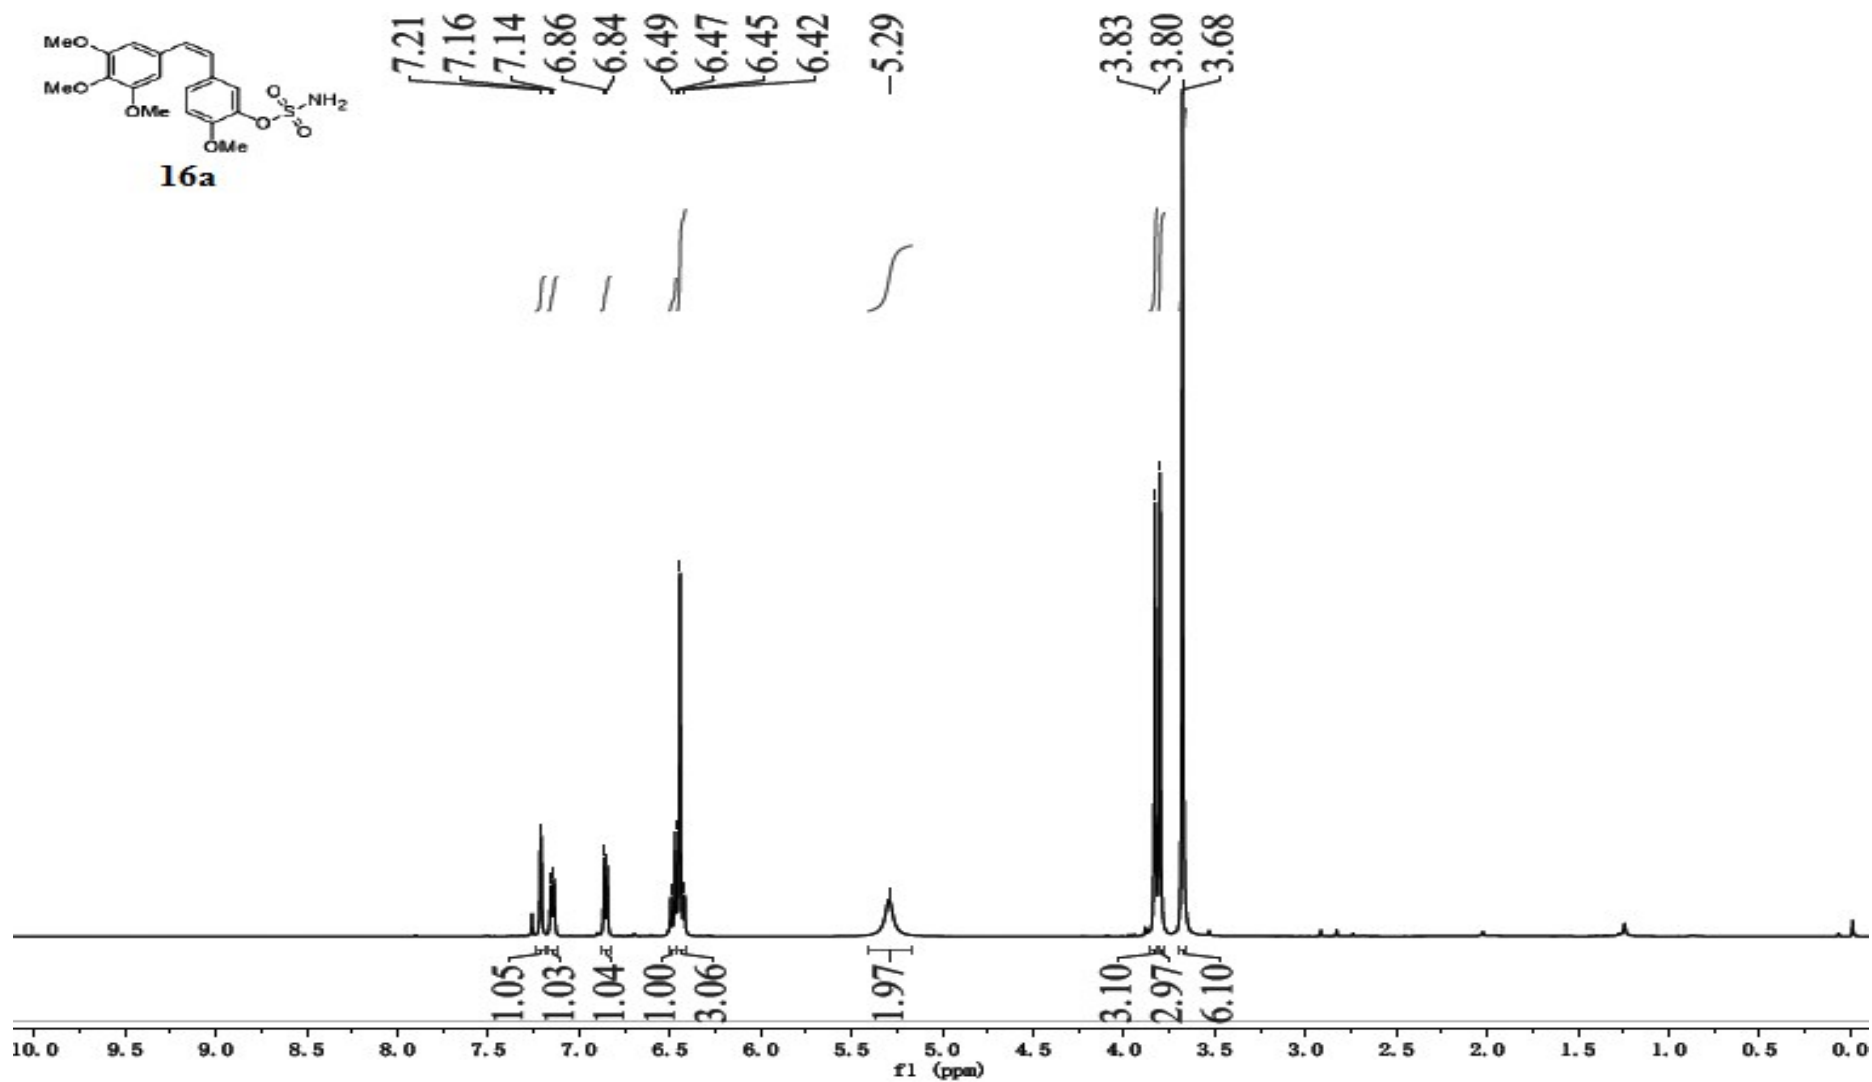

Compound **16a**.  $^{13}\text{C}$  NMR,  $\text{CDCl}_3$ , 125 MHz

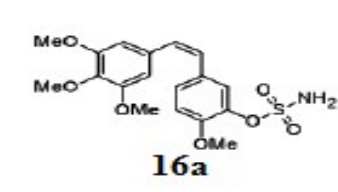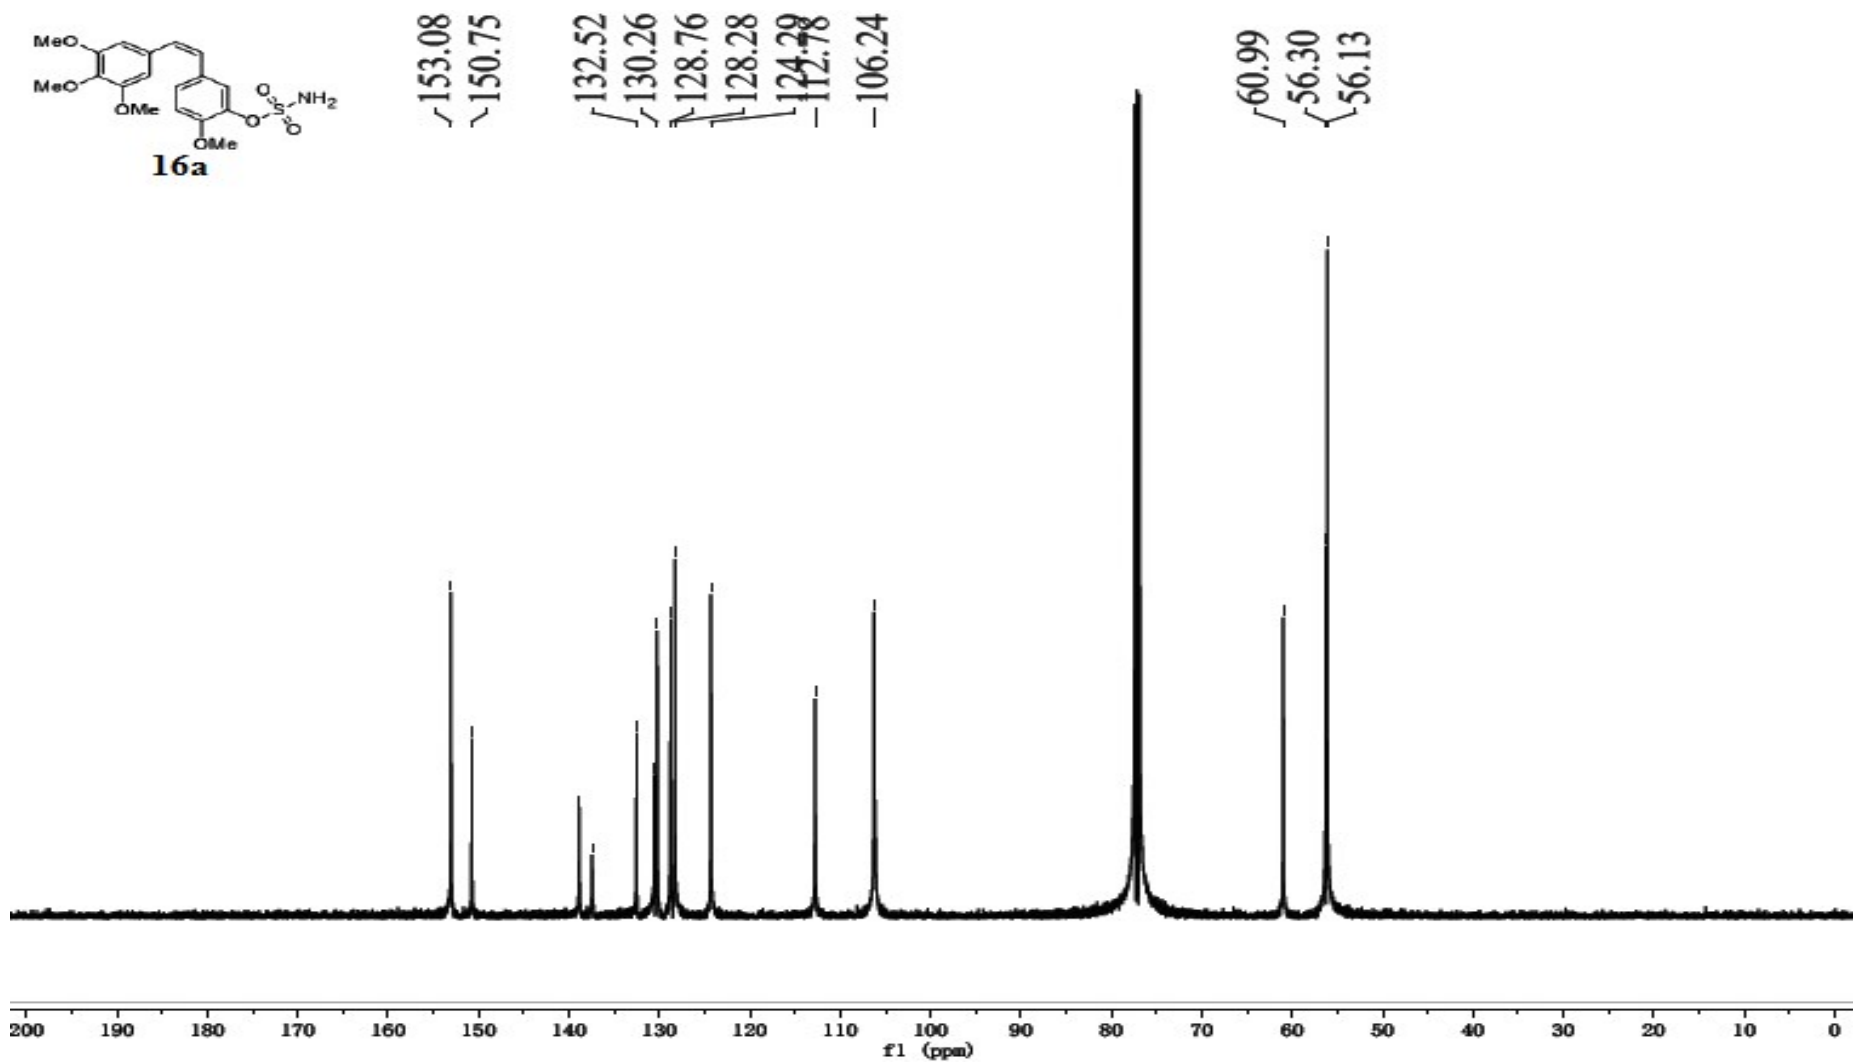



**Compound 16a. HRMS**

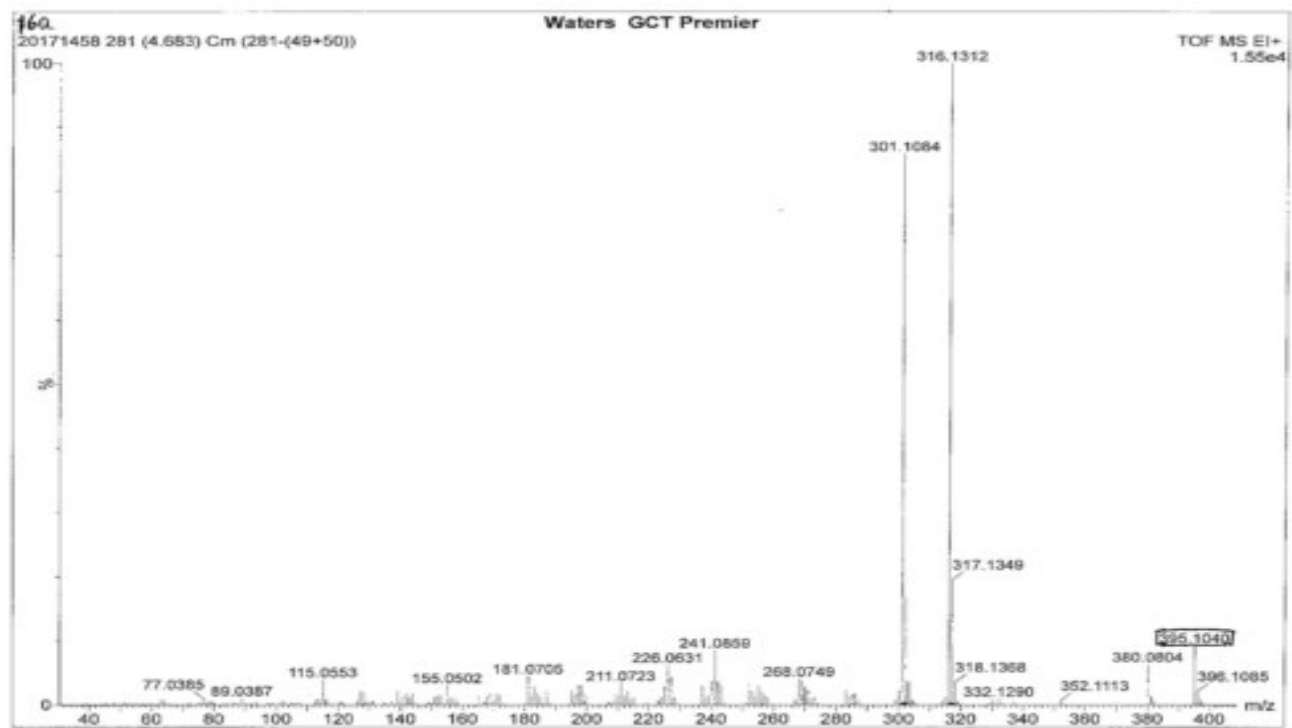

# HPLC Spectrum of compound 16a

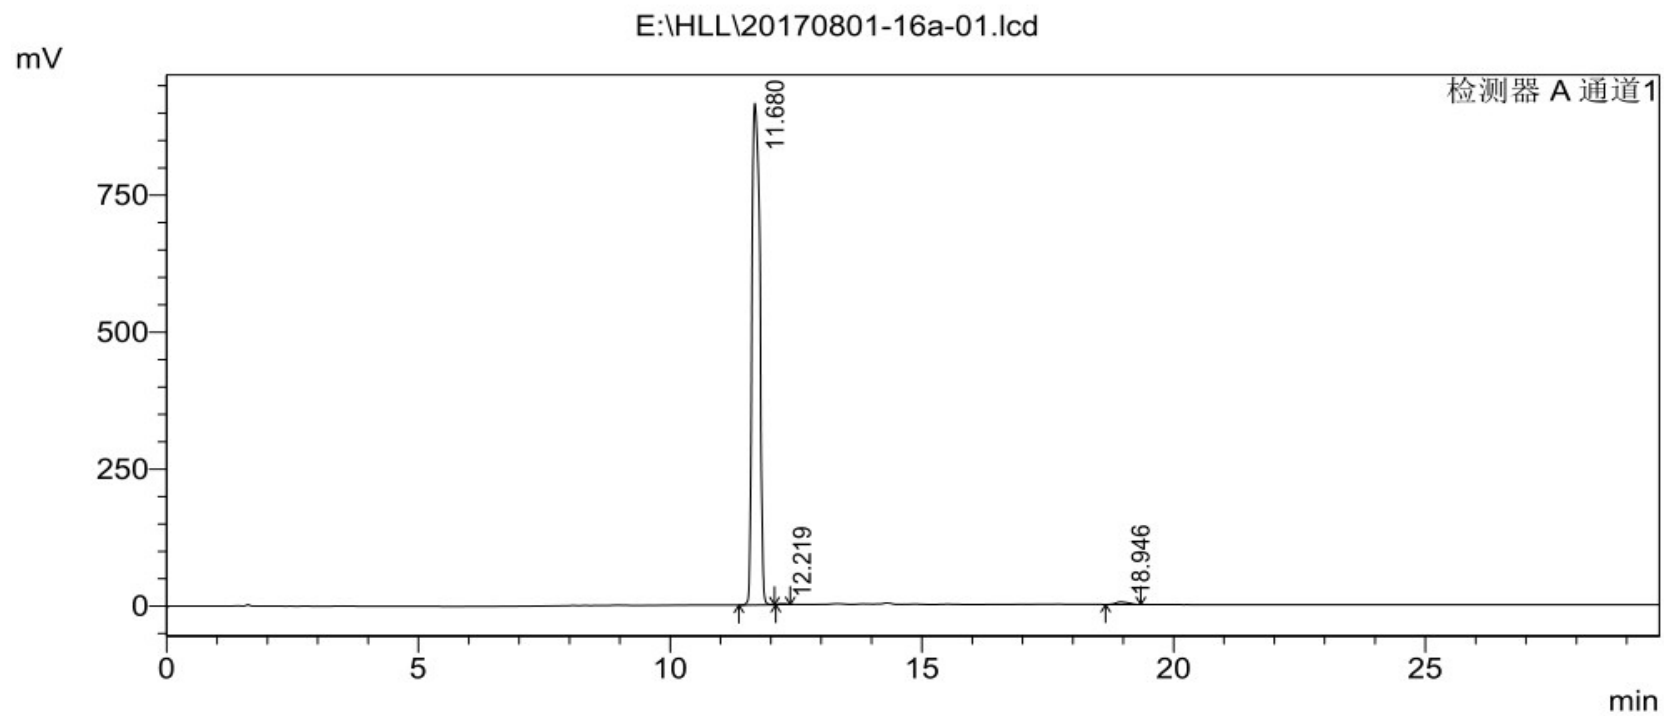

1 检测器 A 通道1/220nm

峰表

检测器 A Ch1 220nm

| 峰# | 保留时间   | 面积      | 高度     | 面积 %    | 高度 %    |
|----|--------|---------|--------|---------|---------|
| 1  | 11.680 | 9829679 | 915884 | 98.972  | 99.307  |
| 2  | 12.219 | 17965   | 1645   | 0.181   | 0.178   |
| 3  | 18.946 | 84123   | 4746   | 0.847   | 0.515   |
| 总计 |        | 9931766 | 922274 | 100.000 | 100.000 |

Compound 16b. <sup>1</sup>H NMR, DMSO, 500 MHz

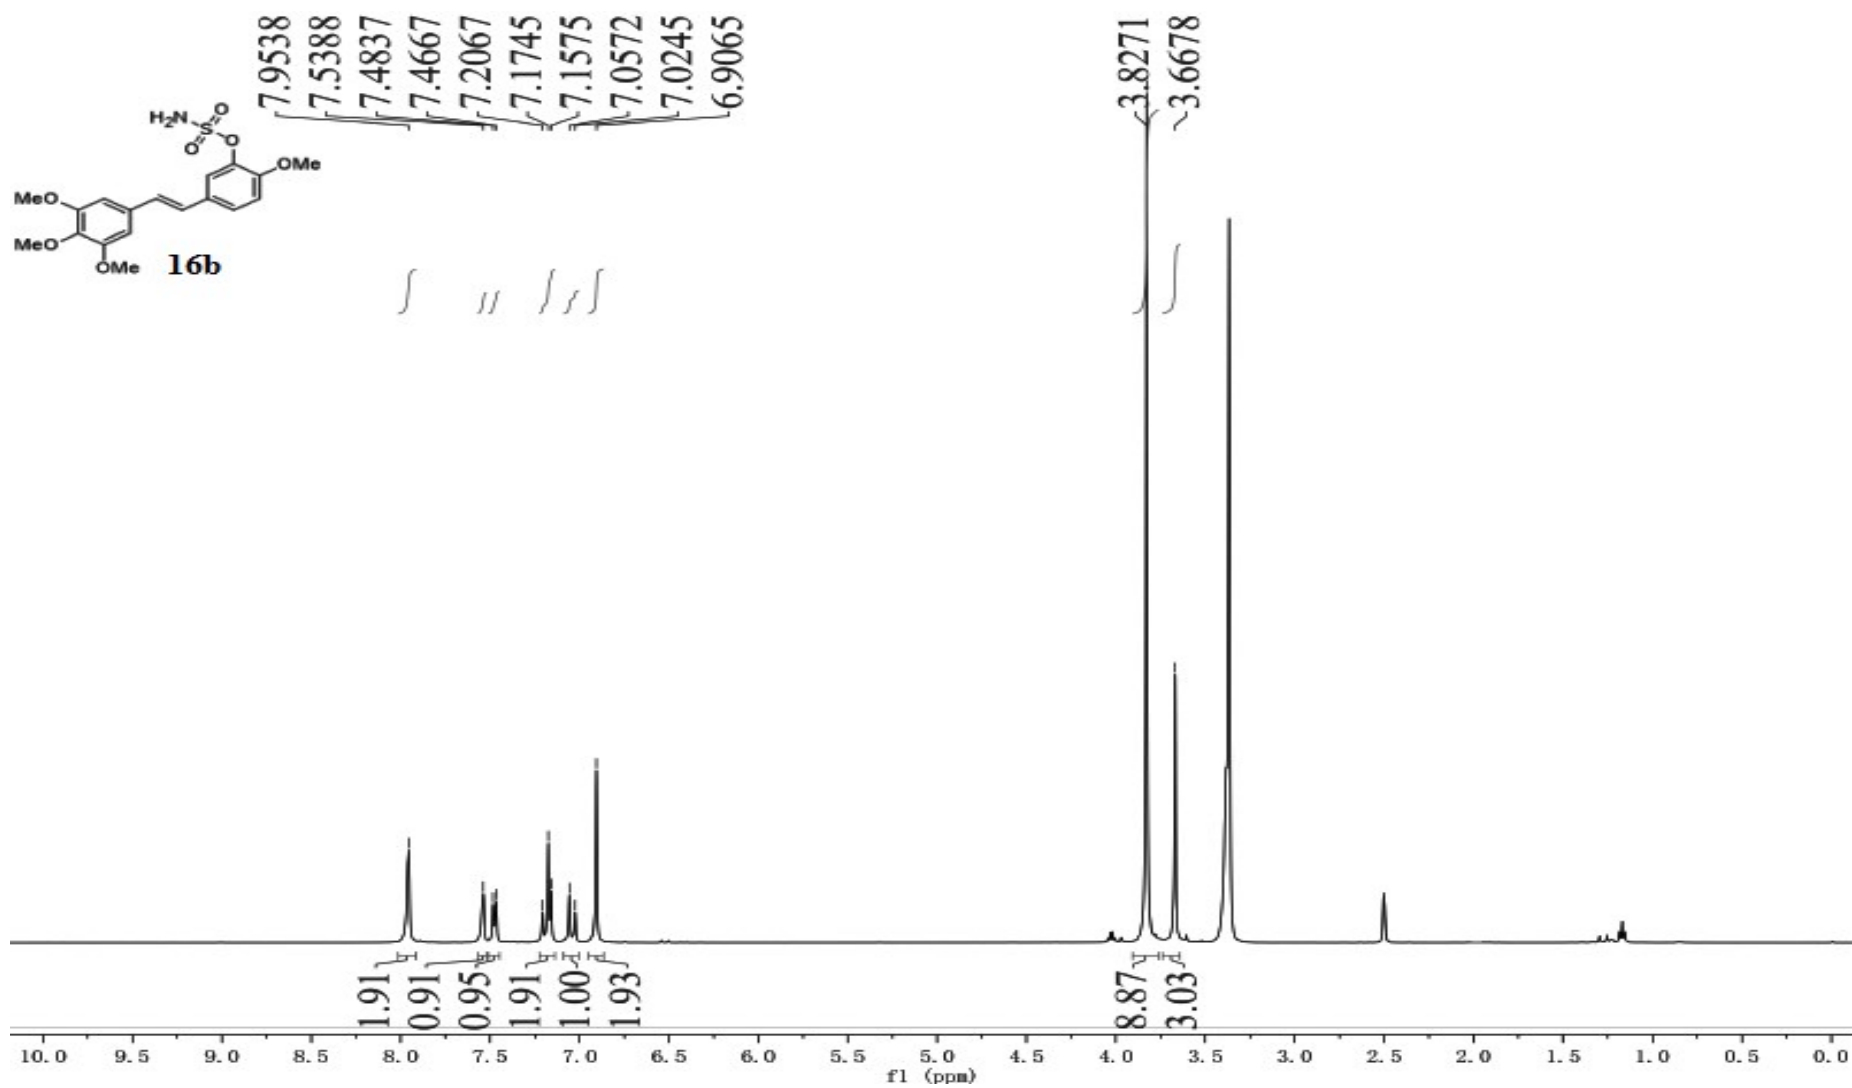

Compound 16b.  $^{13}\text{C}$  NMR, DMSO, 125 MHz

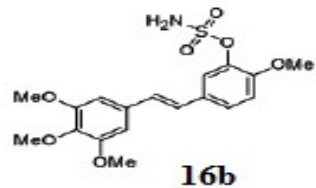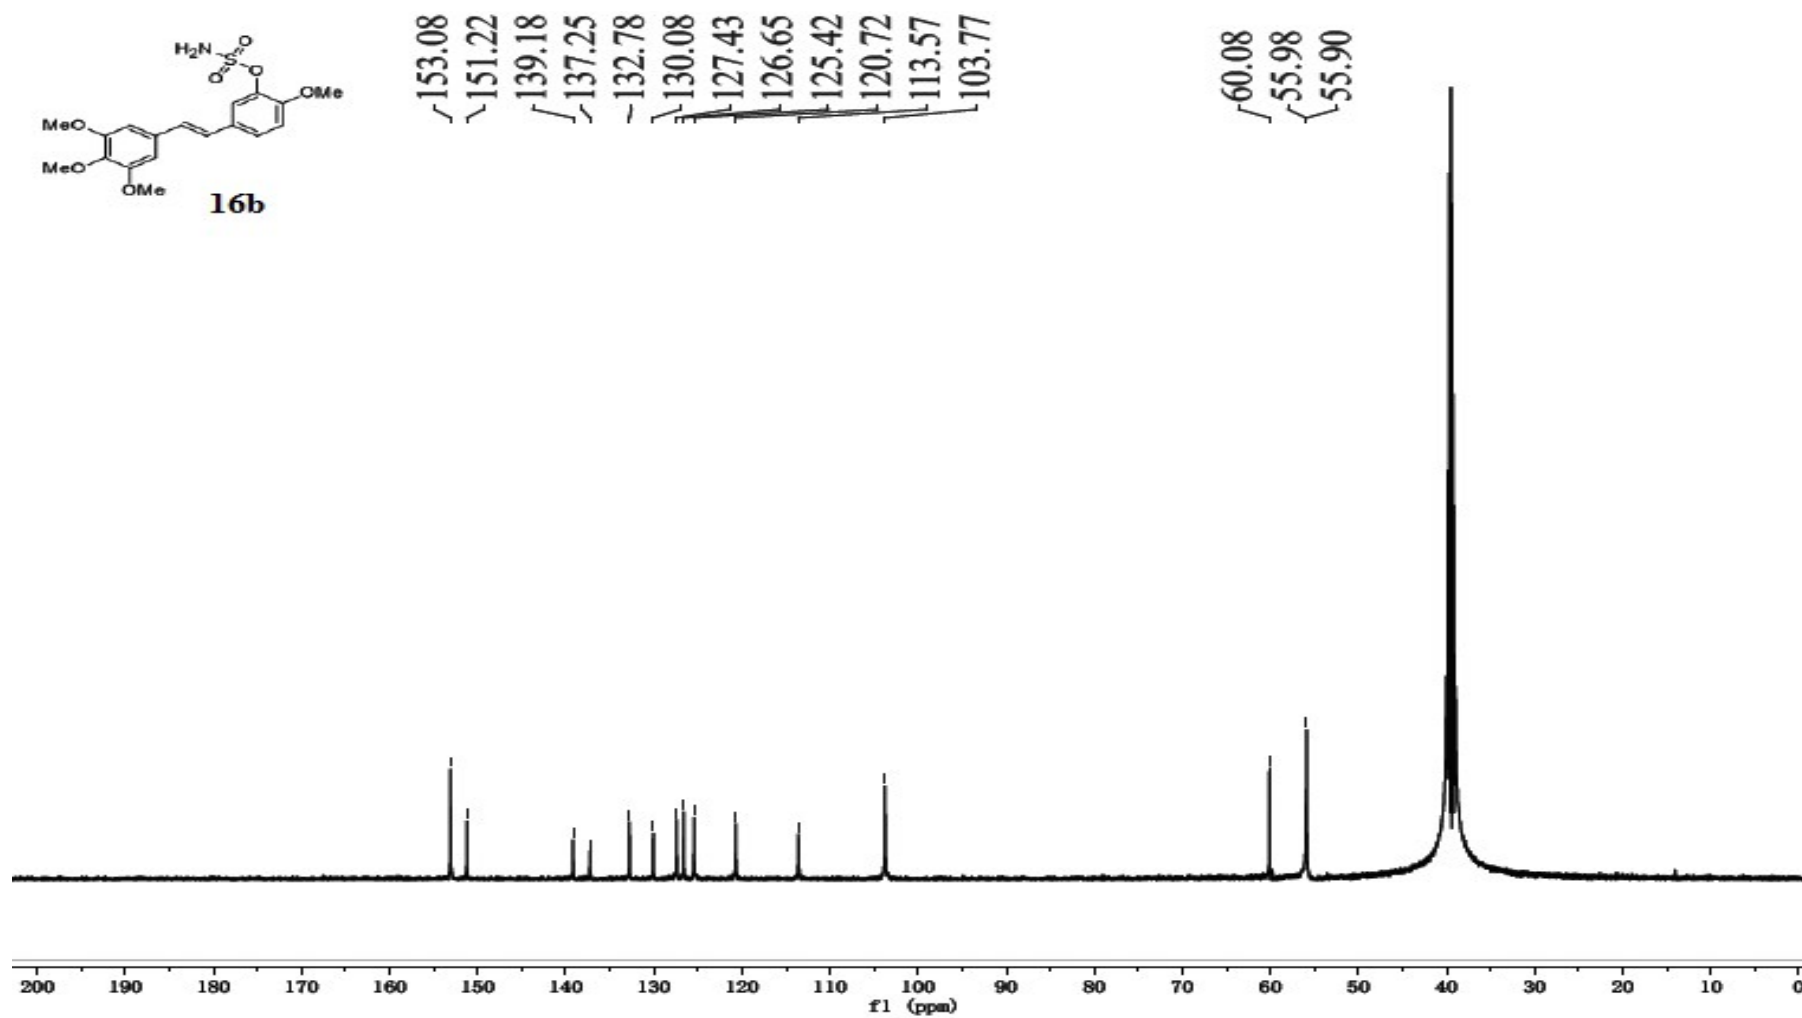

**HR-MS Spectrum of Compound 16b**

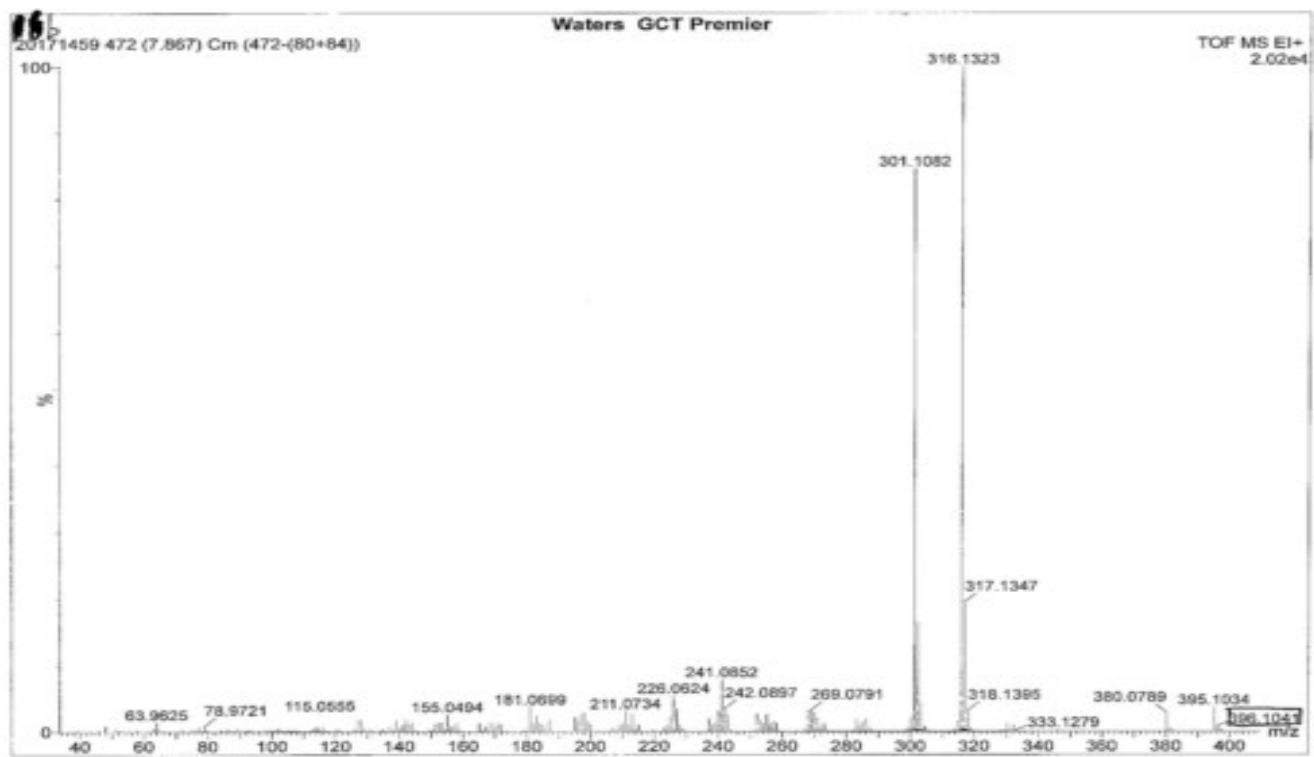

**HPLC Spectrum of Compound 16b**



F:\HLL\20180105-16b-04.lcd

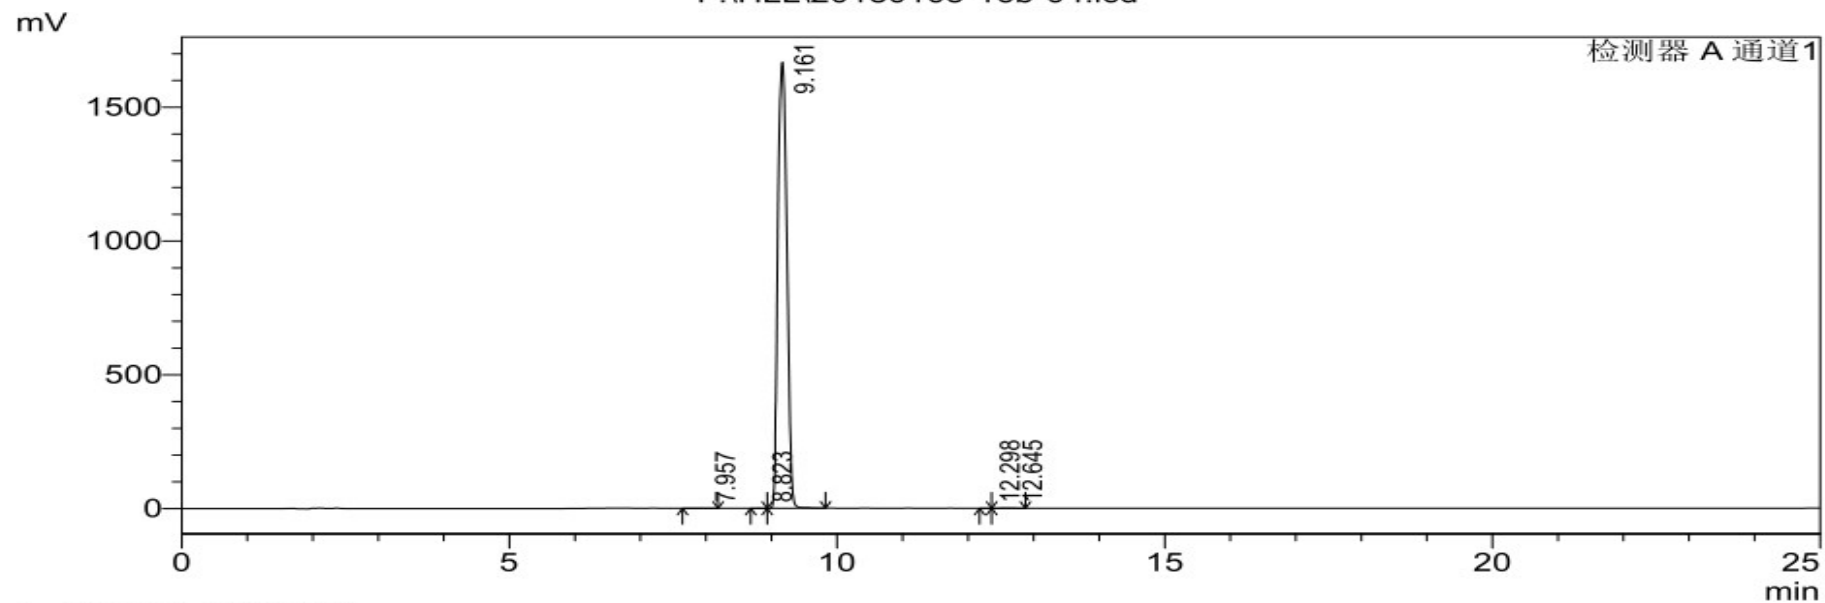

1 检测器 A 通道1/276nm

峰表

检测器 A Ch1 276nm

| 峰# | 保留时间   | 面积       | 高度      | 面积 %    | 高度 %    |
|----|--------|----------|---------|---------|---------|
| 1  | 7.957  | 4050     | 347     | 0.025   | 0.021   |
| 2  | 8.823  | 2179     | 264     | 0.014   | 0.016   |
| 3  | 9.161  | 16077698 | 1668058 | 99.883  | 99.908  |
| 4  | 12.298 | 644      | 95      | 0.004   | 0.006   |
| 5  | 12.645 | 11966    | 826     | 0.074   | 0.049   |
| 总计 |        | 16096536 | 1669588 | 100.000 | 100.000 |

Compound 16c. <sup>1</sup>H NMR, DMSO, 500 MHz

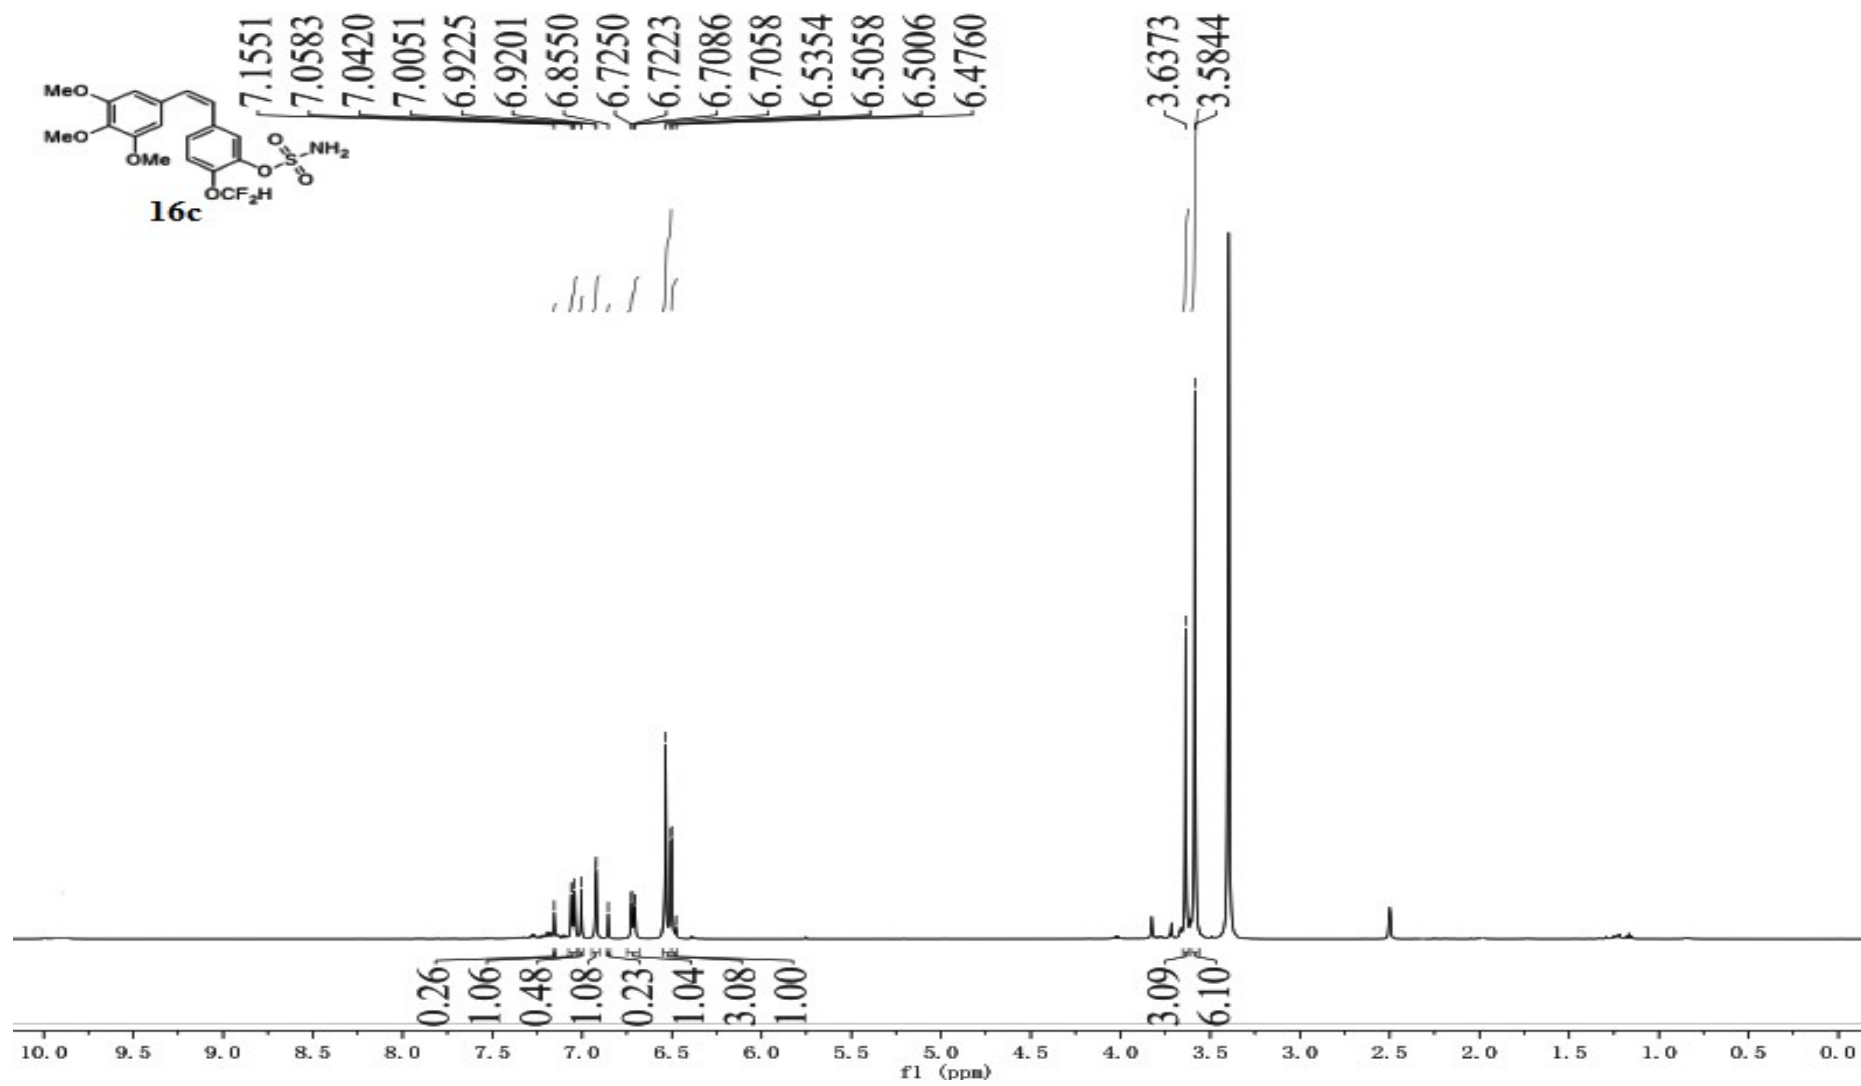

**Compound 16c.** <sup>19</sup>F NMR, DMSO, 145 MHz

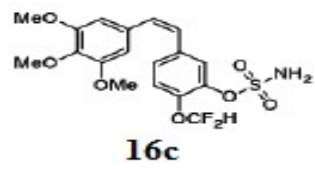

--81.38

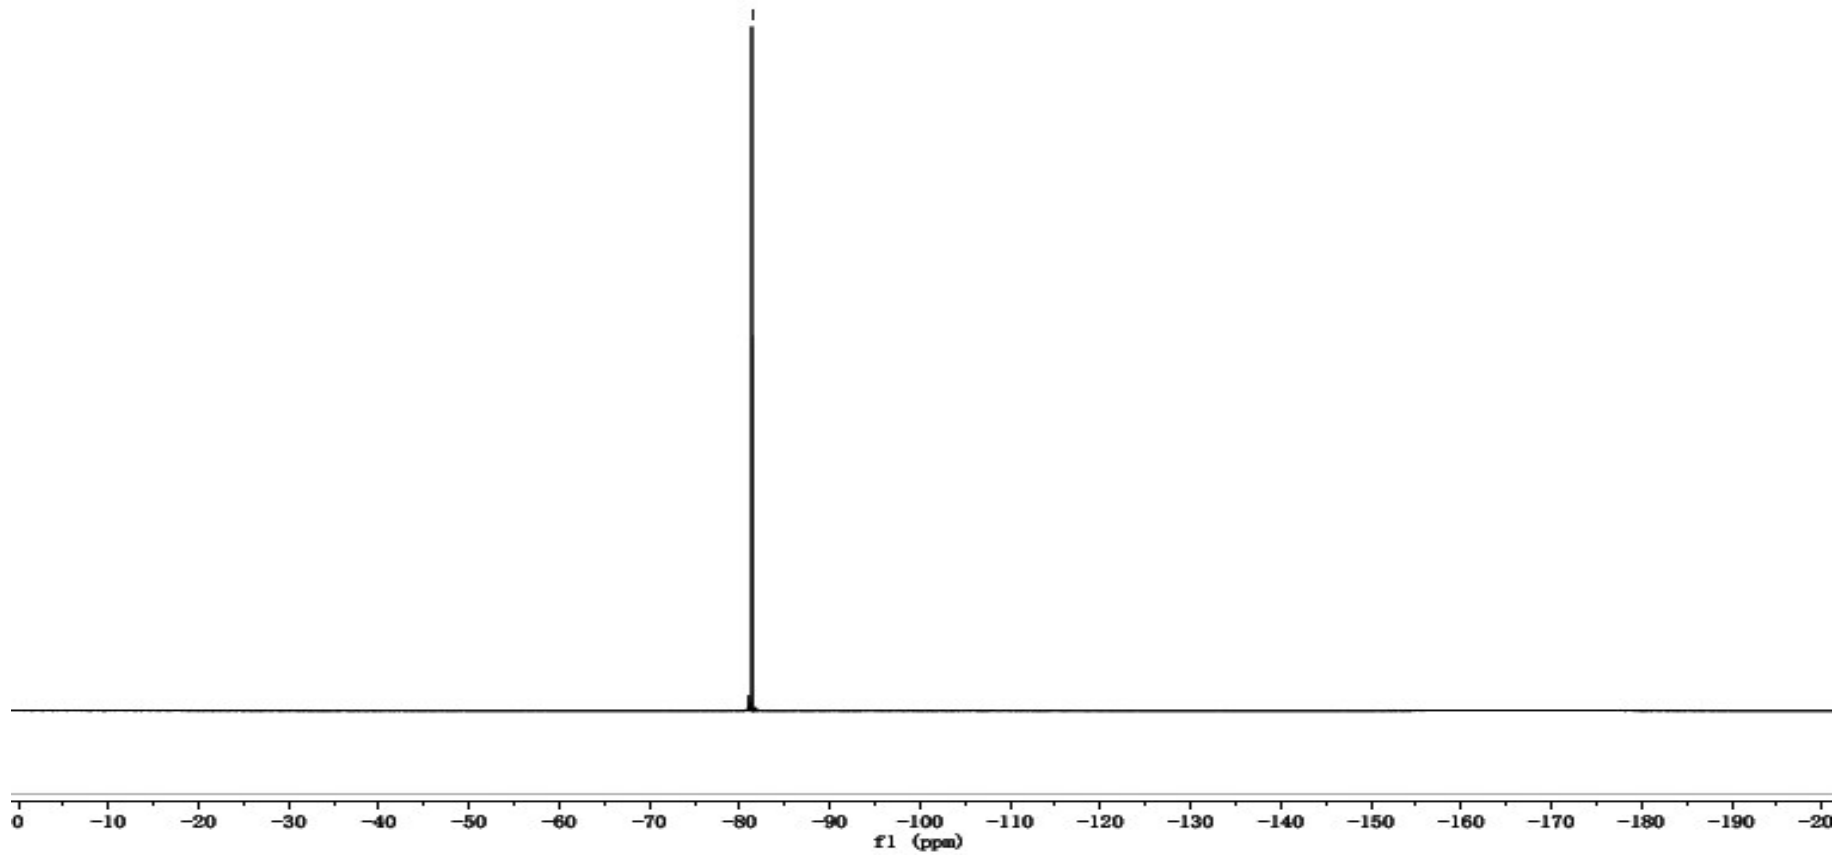

Compound 16c.  $^{13}\text{C}$  NMR, DMSO, 125 MHz

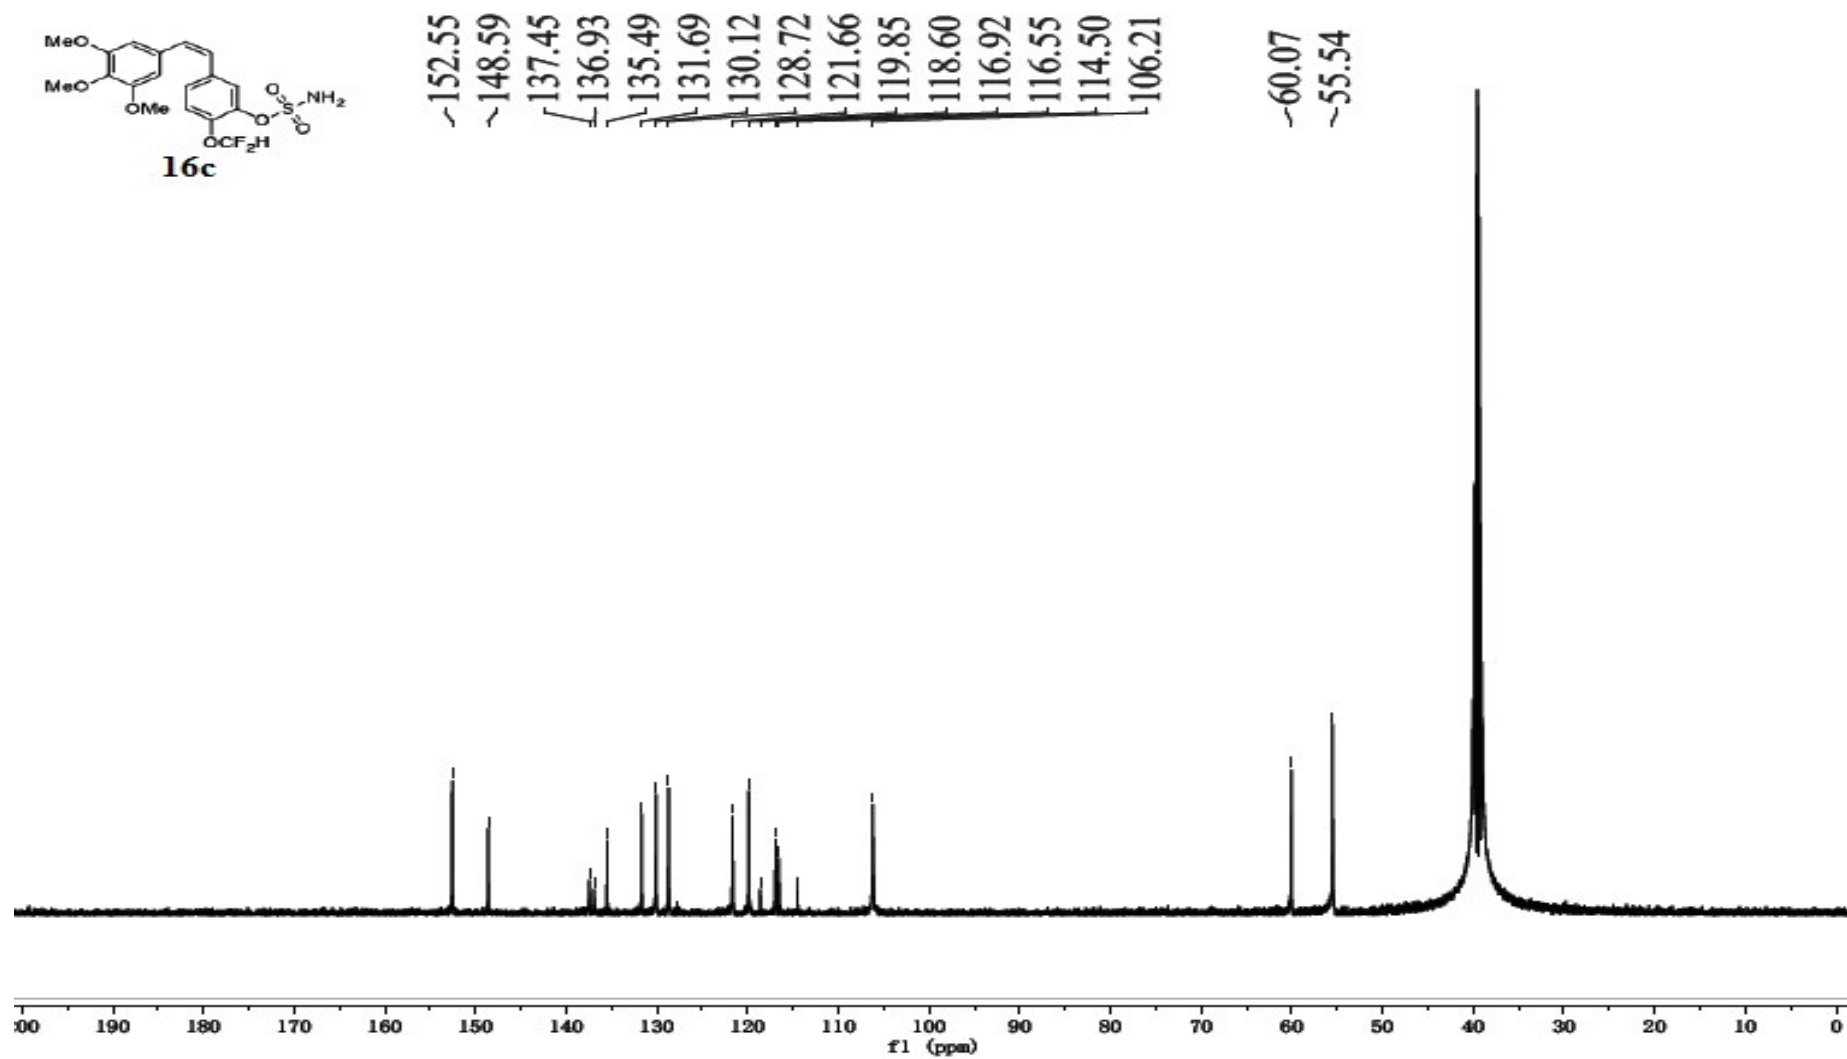

**HR-MS Spectrum of Compound 16c.**

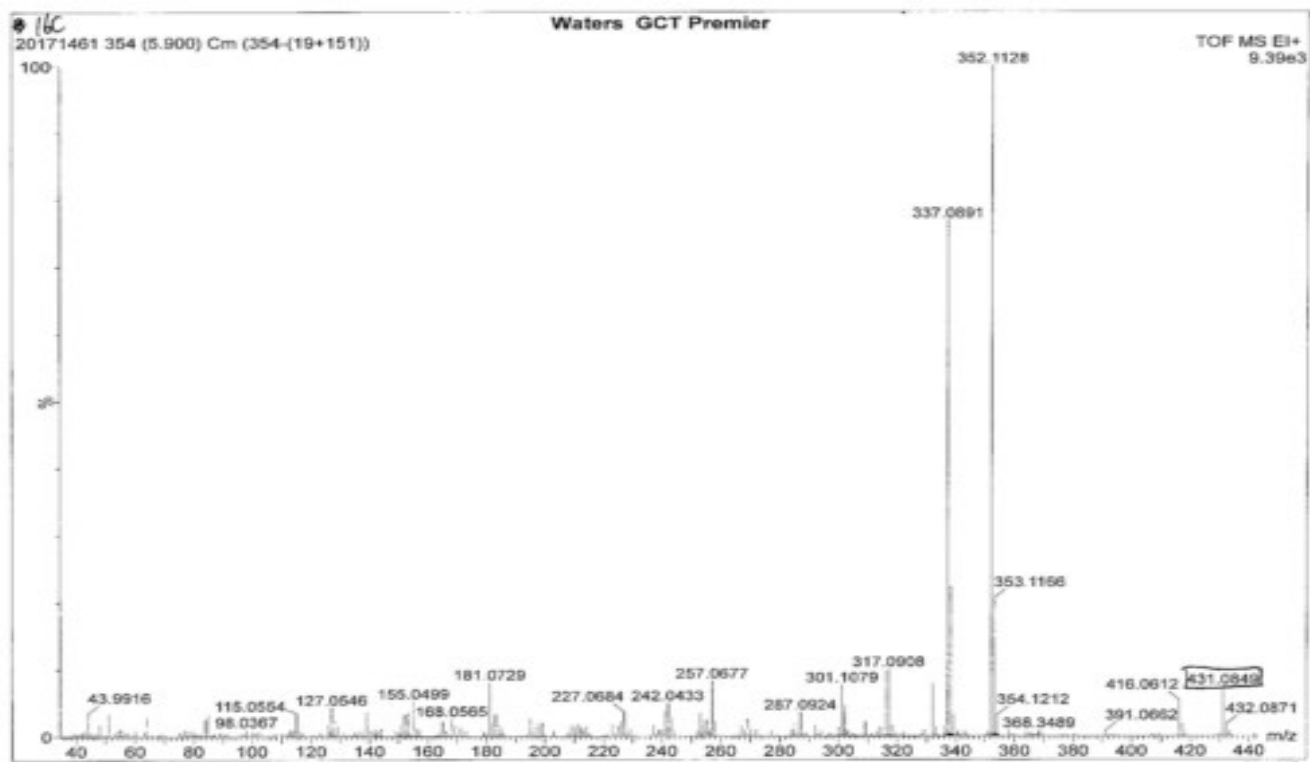

**HPLC Spectrum of compound 16c**

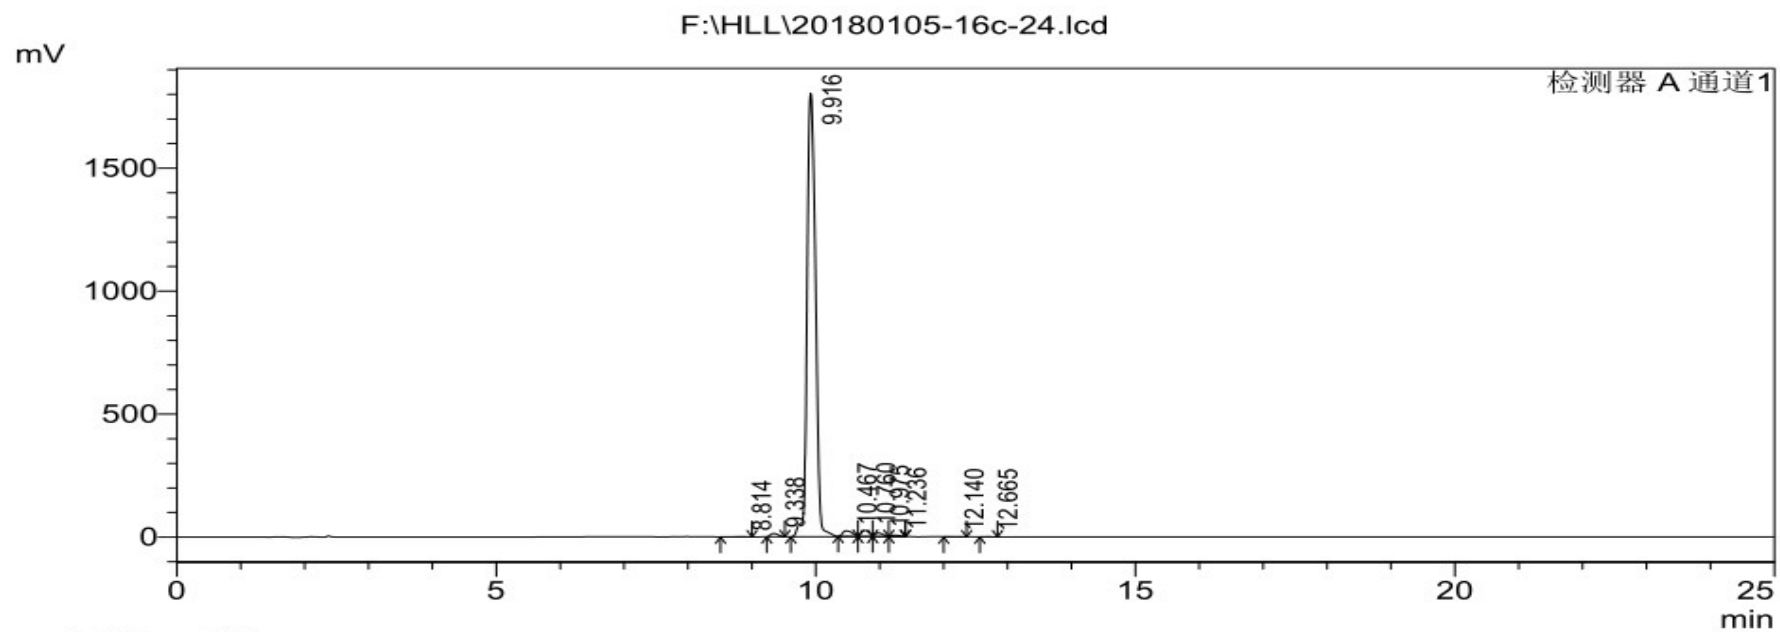

1 检测器 A 通道1/276nm

峰表

检测器 A Ch1 276nm

| 峰# | 保留时间   | 面积       | 高度      | 面积 %    | 高度 %    |
|----|--------|----------|---------|---------|---------|
| 1  | 8.814  | 8860     | 867     | 0.051   | 0.046   |
| 2  | 9.338  | 107015   | 13160   | 0.618   | 0.698   |
| 3  | 9.916  | 16561461 | 1803048 | 95.662  | 95.578  |
| 4  | 10.467 | 235658   | 22578   | 1.361   | 1.197   |
| 5  | 10.760 | 213206   | 24809   | 1.232   | 1.315   |
| 6  | 10.975 | 124078   | 14238   | 0.717   | 0.755   |
| 7  | 11.236 | 44303    | 5525    | 0.256   | 0.293   |
| 8  | 12.140 | 13396    | 1689    | 0.077   | 0.090   |
| 9  | 12.665 | 4414     | 545     | 0.025   | 0.029   |
| 总计 |        | 17312392 | 1886459 | 100.000 | 100.000 |

Compound 16d. <sup>1</sup>H NMR, DMSO, 500 MHz



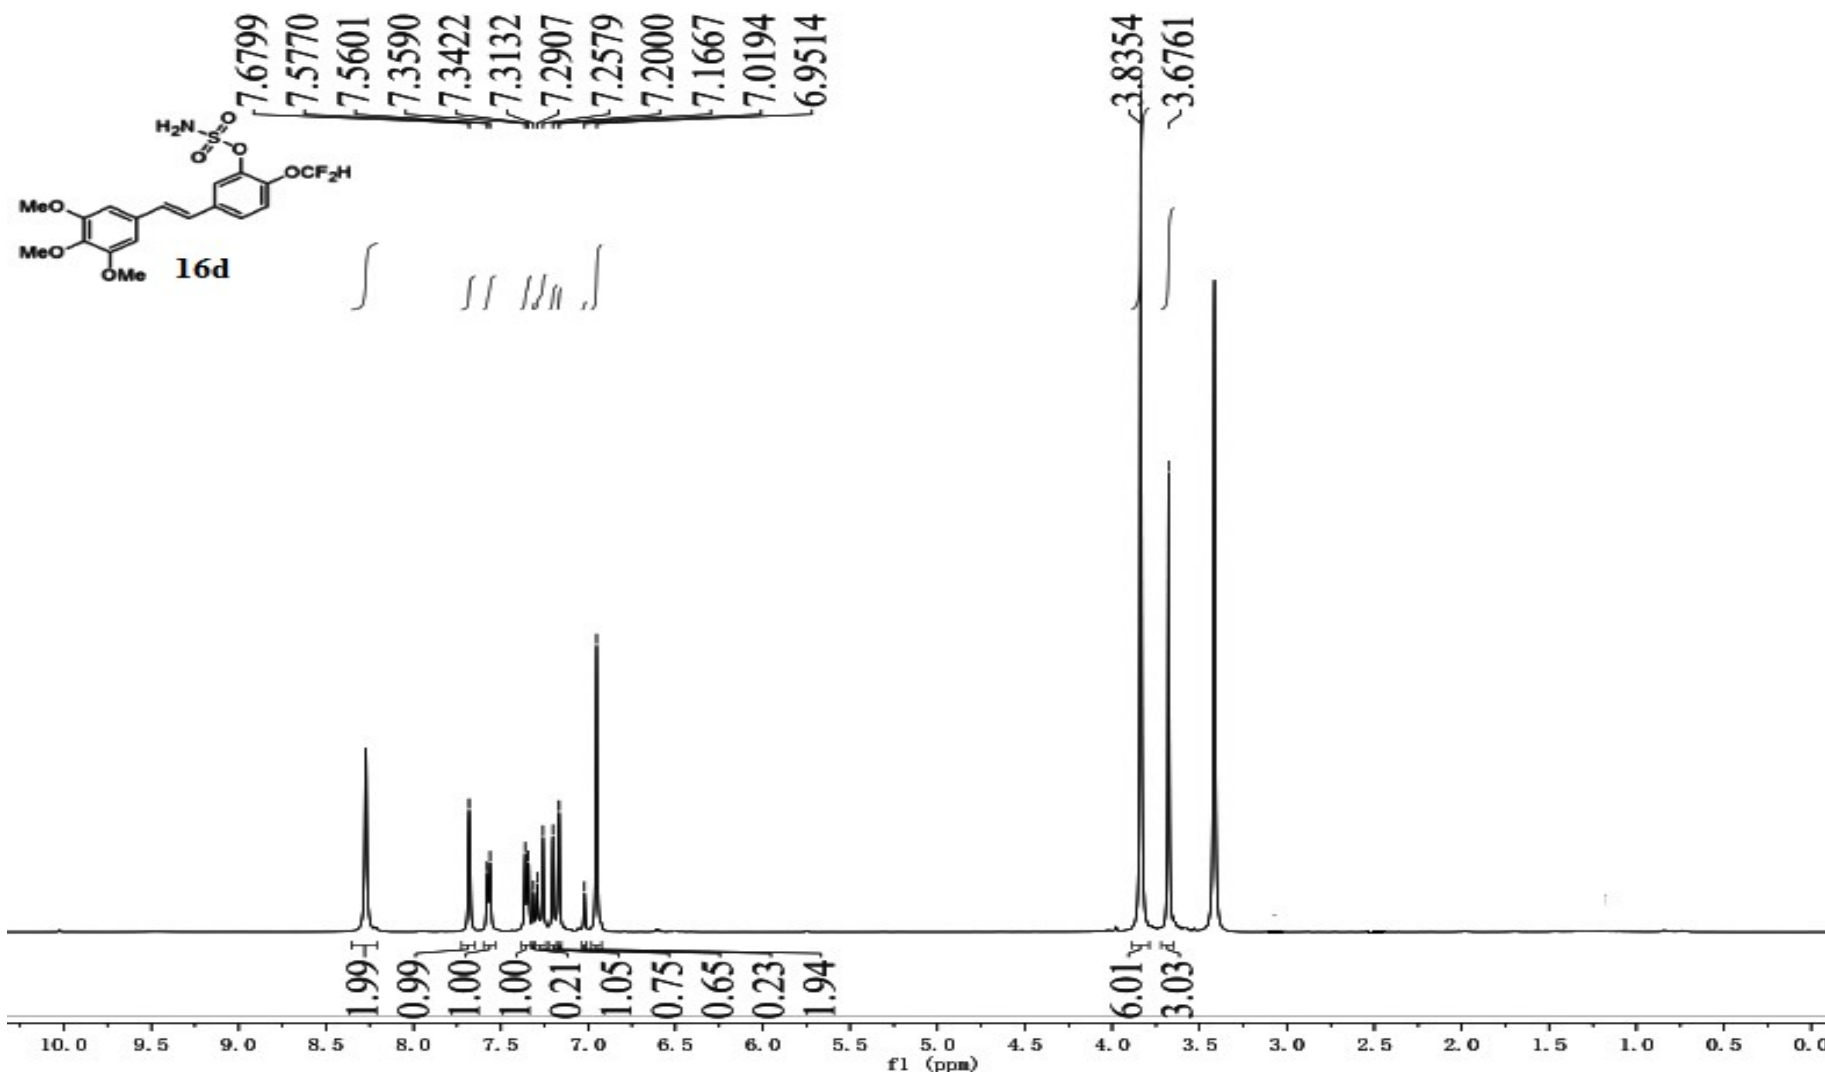

Compound **16d**. <sup>1</sup>H NMR, DMSO, 145 MHz

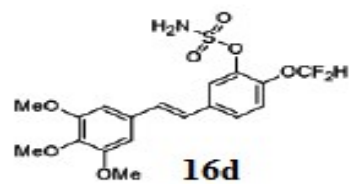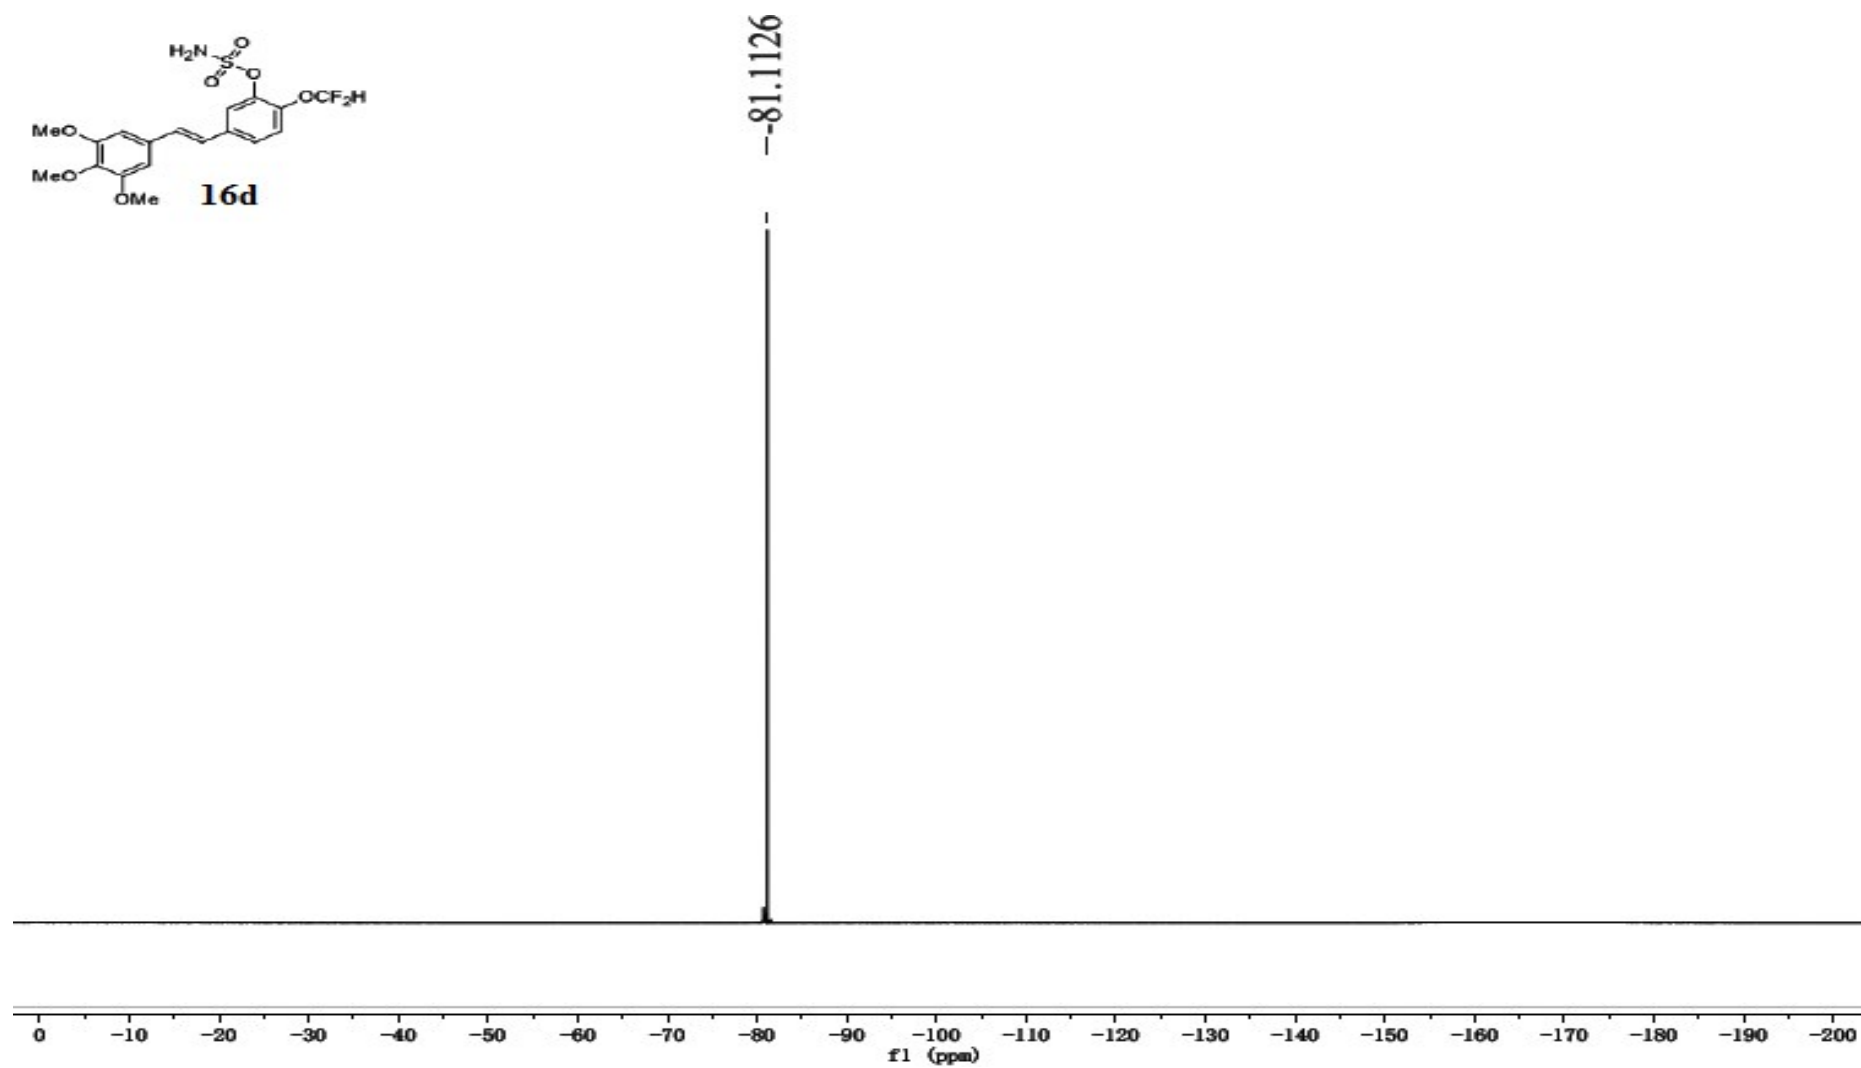

Compound 16d. <sup>13</sup>C NMR, DMSO, 125 MHz

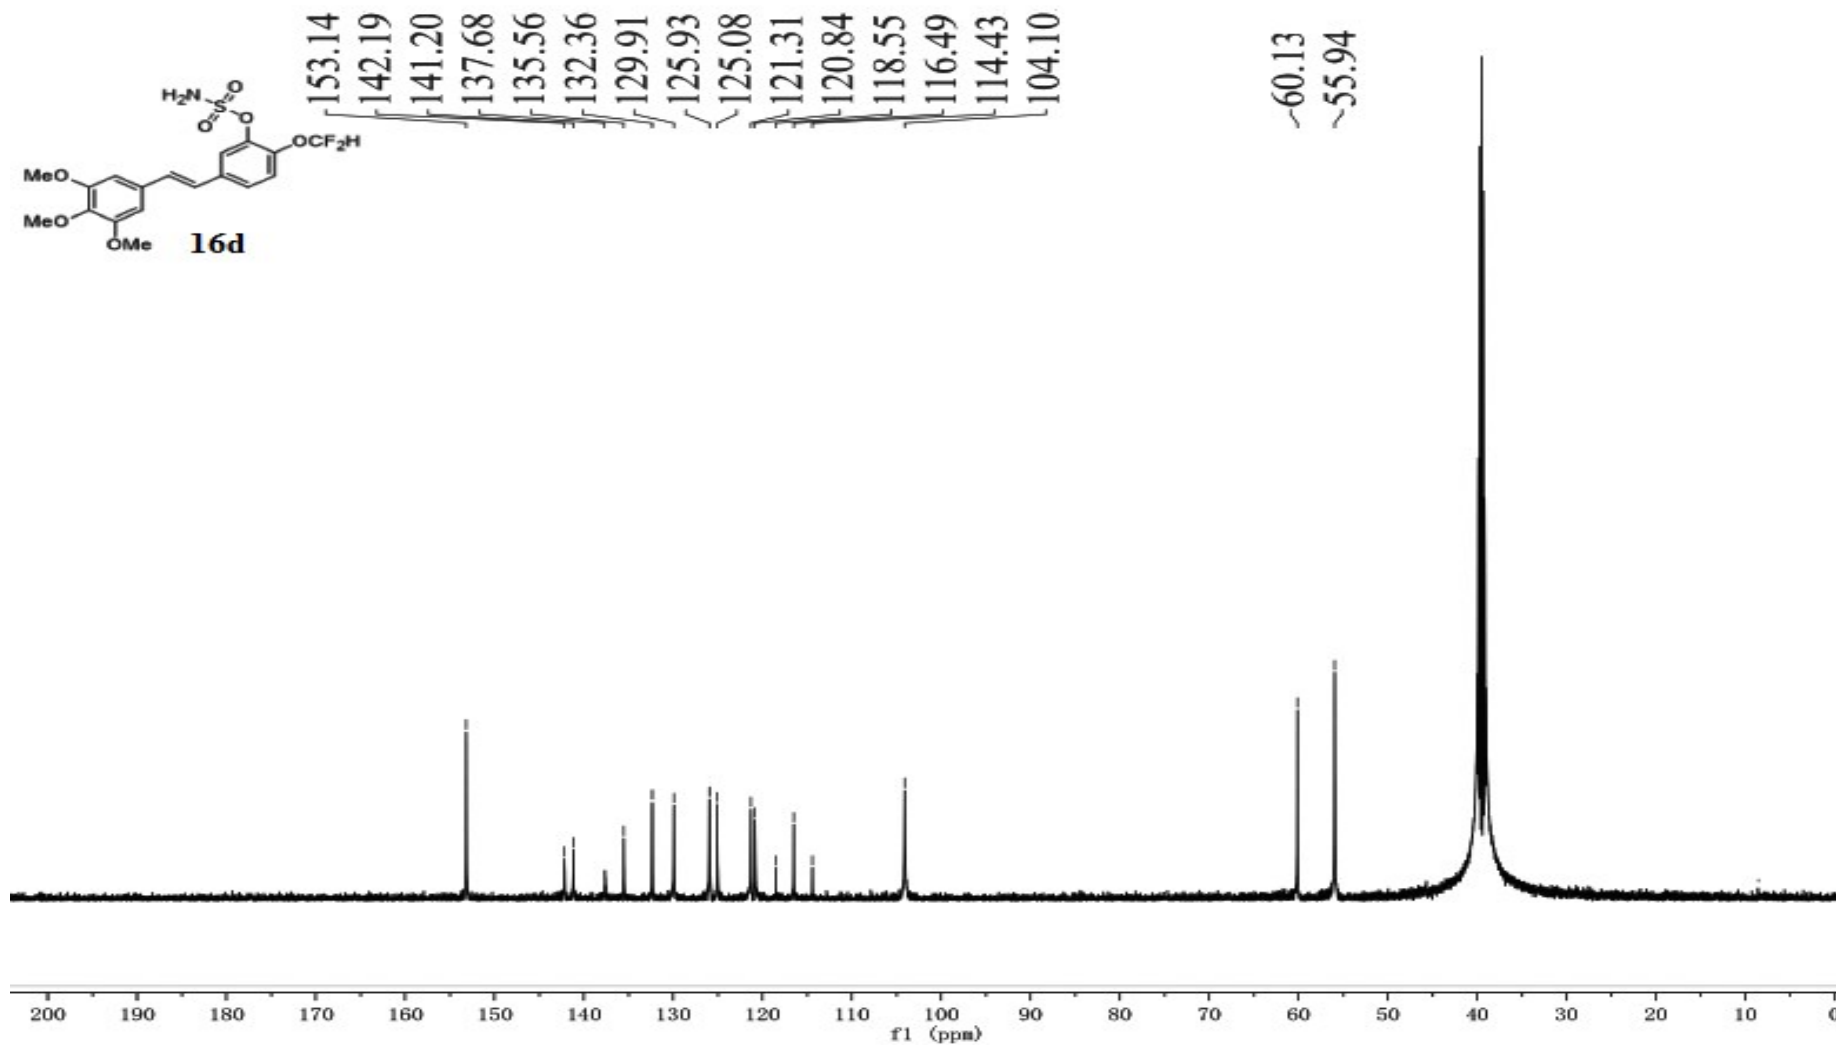

HR-MS Spectrum of Compound 16d.

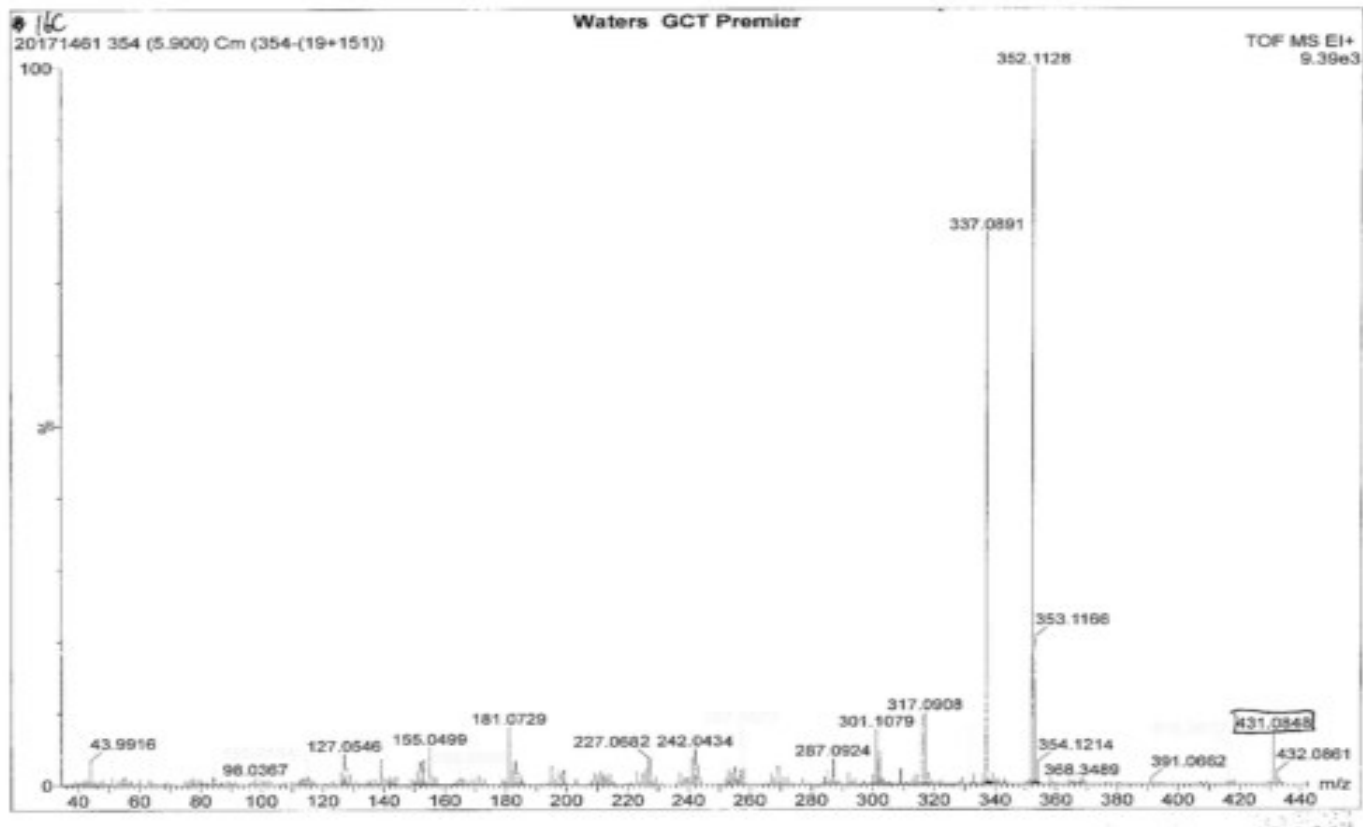

HPLC Spectrum of Compound 16d

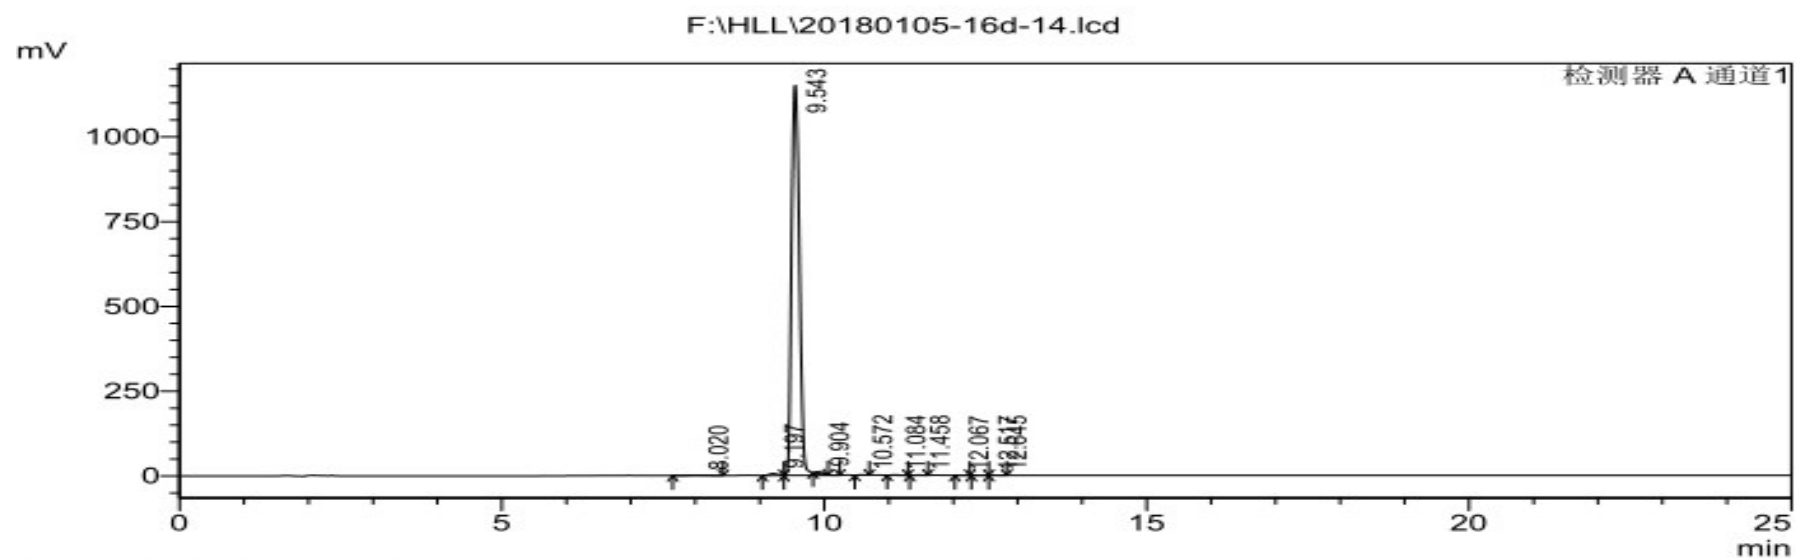

峰表

| 峰# | 保留时间   | 面积      | 高度      | 面积 %    | 高度 %    |
|----|--------|---------|---------|---------|---------|
| 1  | 8.020  | 15843   | 1021    | 0.161   | 0.087   |
| 2  | 9.197  | 56374   | 5447    | 0.572   | 0.467   |
| 3  | 9.543  | 9704265 | 1150511 | 98.488  | 98.603  |
| 4  | 9.904  | 40013   | 5433    | 0.406   | 0.466   |
| 5  | 10.572 | 9751    | 1341    | 0.099   | 0.115   |
| 6  | 11.084 | 9877    | 1100    | 0.100   | 0.094   |
| 7  | 11.458 | 8797    | 1023    | 0.089   | 0.088   |
| 8  | 12.067 | 159     | 20      | 0.002   | 0.002   |
| 9  | 12.517 | 2680    | 314     | 0.027   | 0.027   |
| 10 | 12.645 | 5453    | 603     | 0.055   | 0.052   |
| 总计 |        | 9853213 | 1166813 | 100.000 | 100.000 |

Compound 16e.  $^1\text{H}$  NMR,  $\text{CDCl}_3$ , 500 MHz

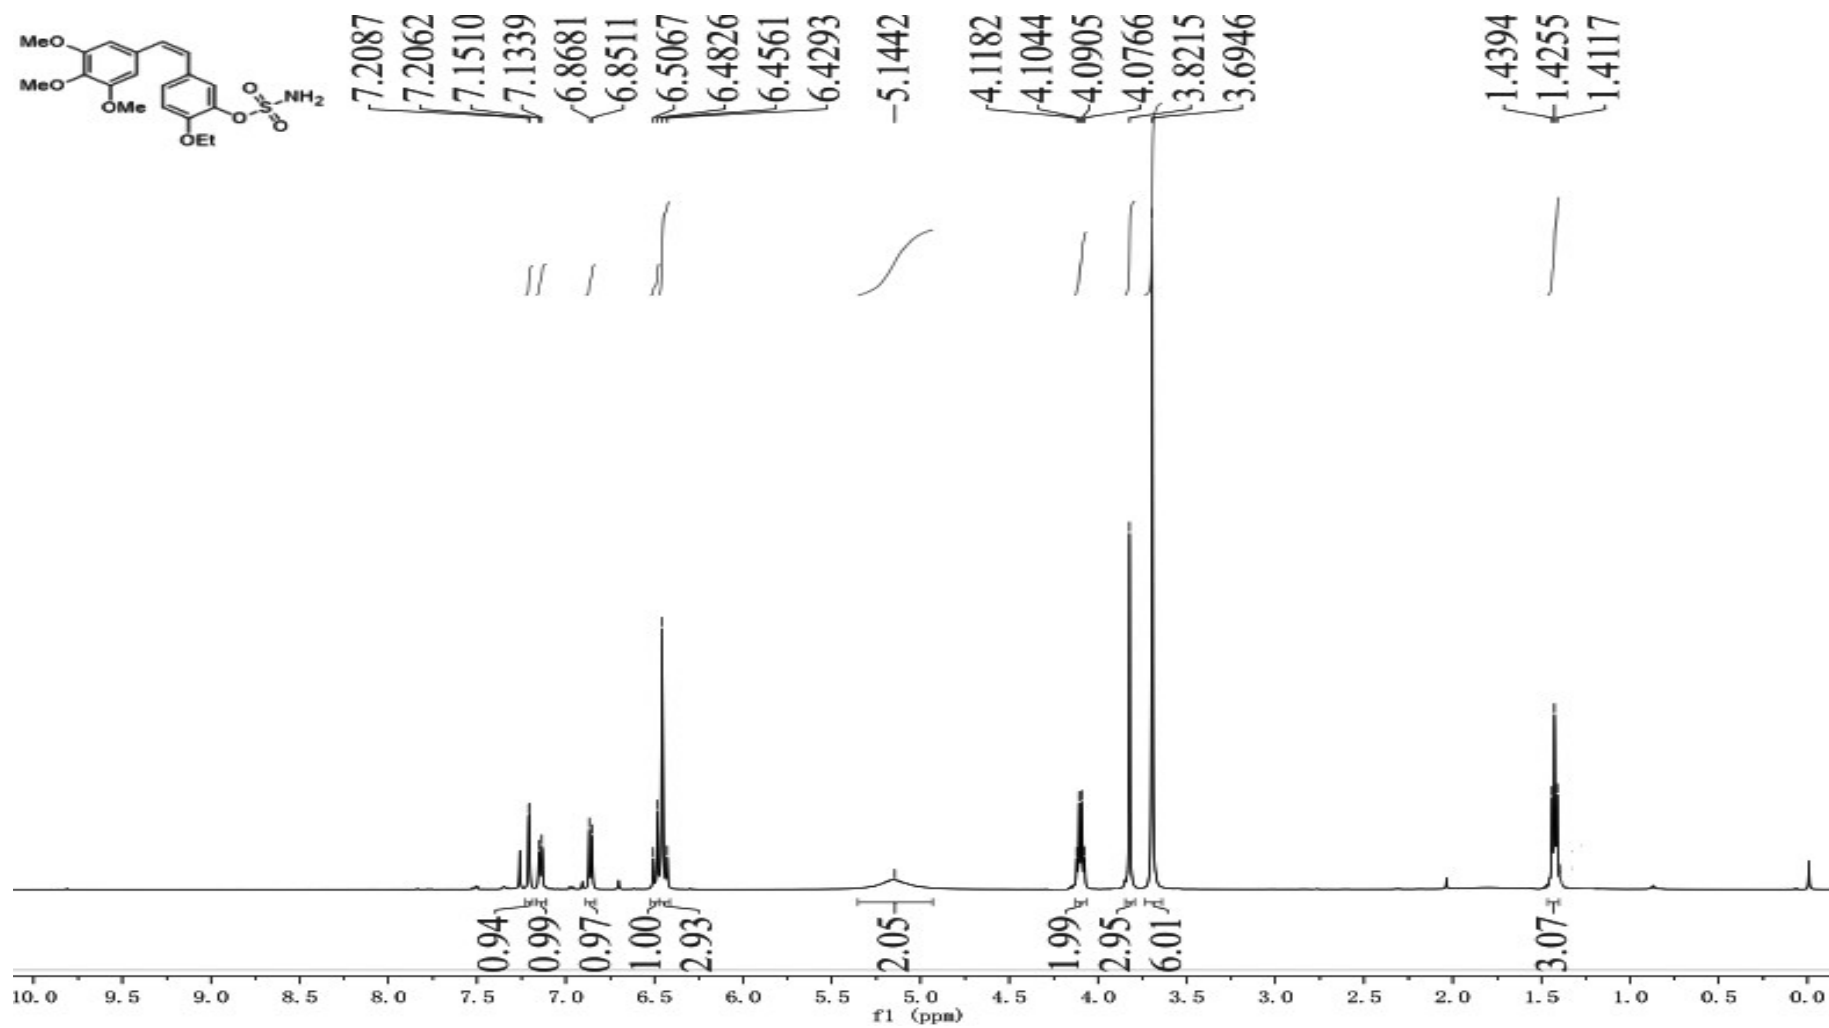

Compound 16e. <sup>13</sup>C NMR, CDCl<sub>3</sub>, 125 MHz

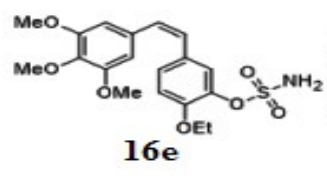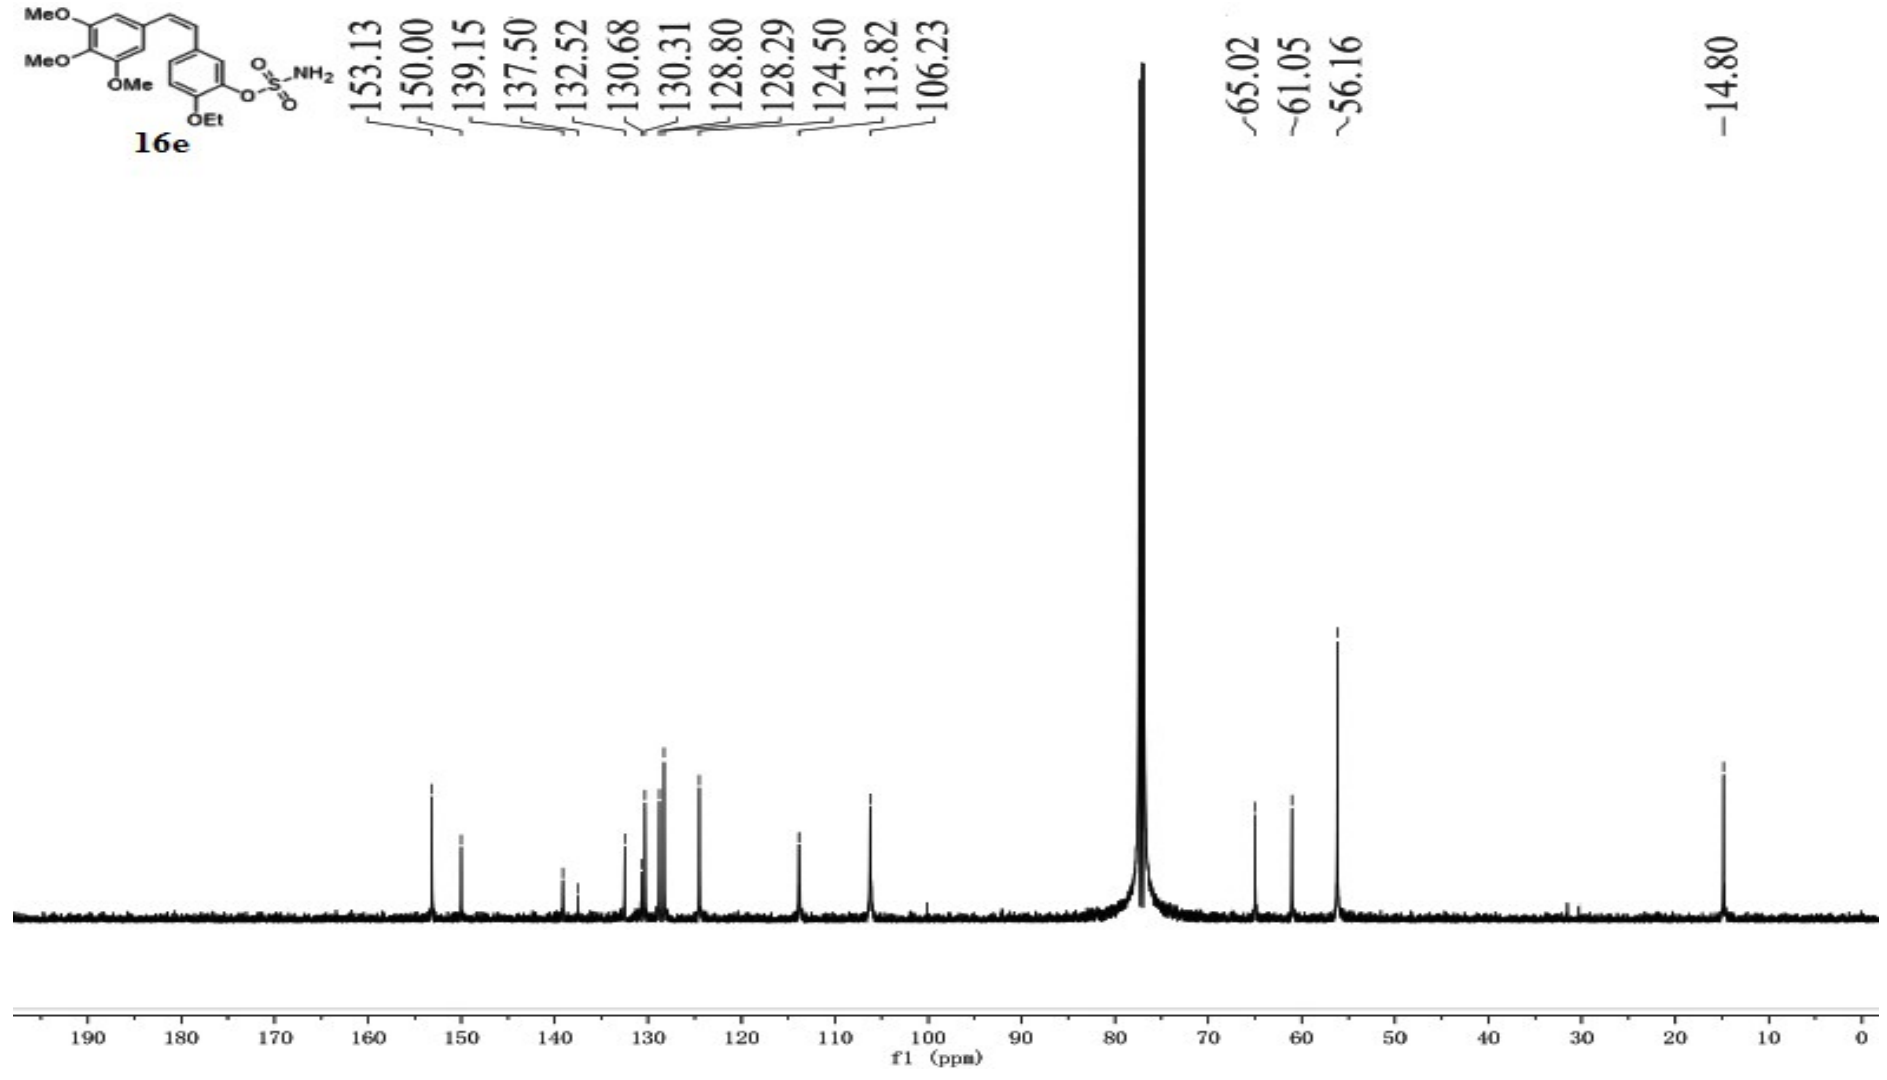

**HR-MS Spectrum of Compound 16e**



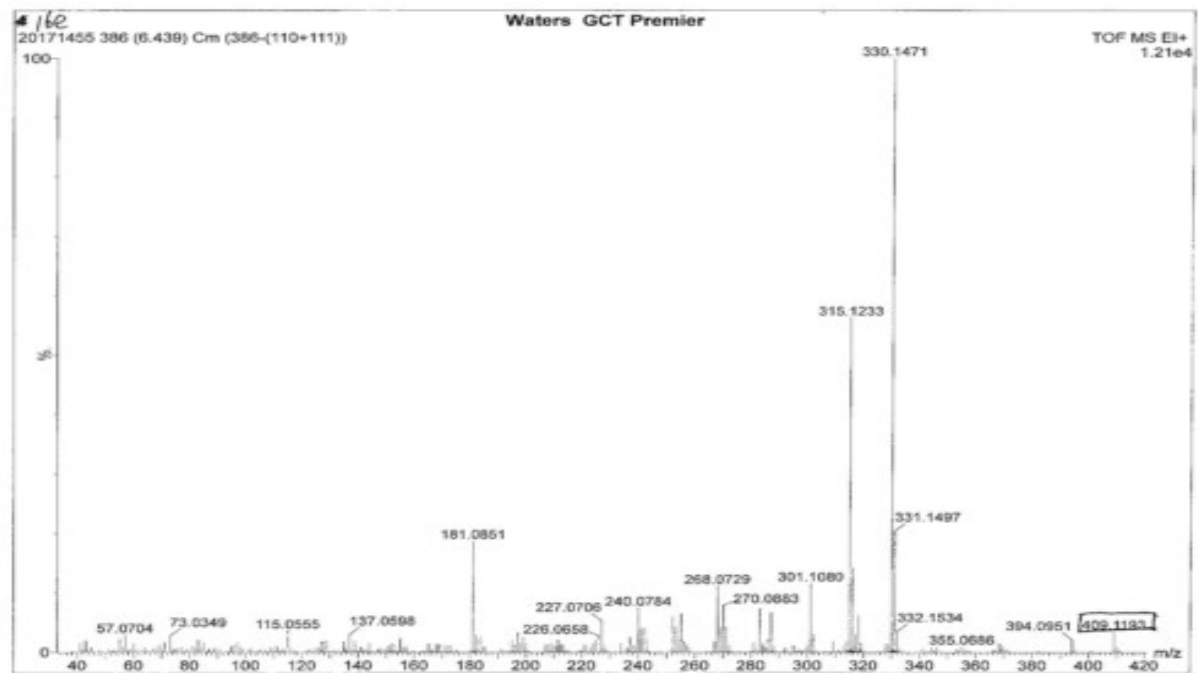

# HPLC Spectrum of Compound 16e

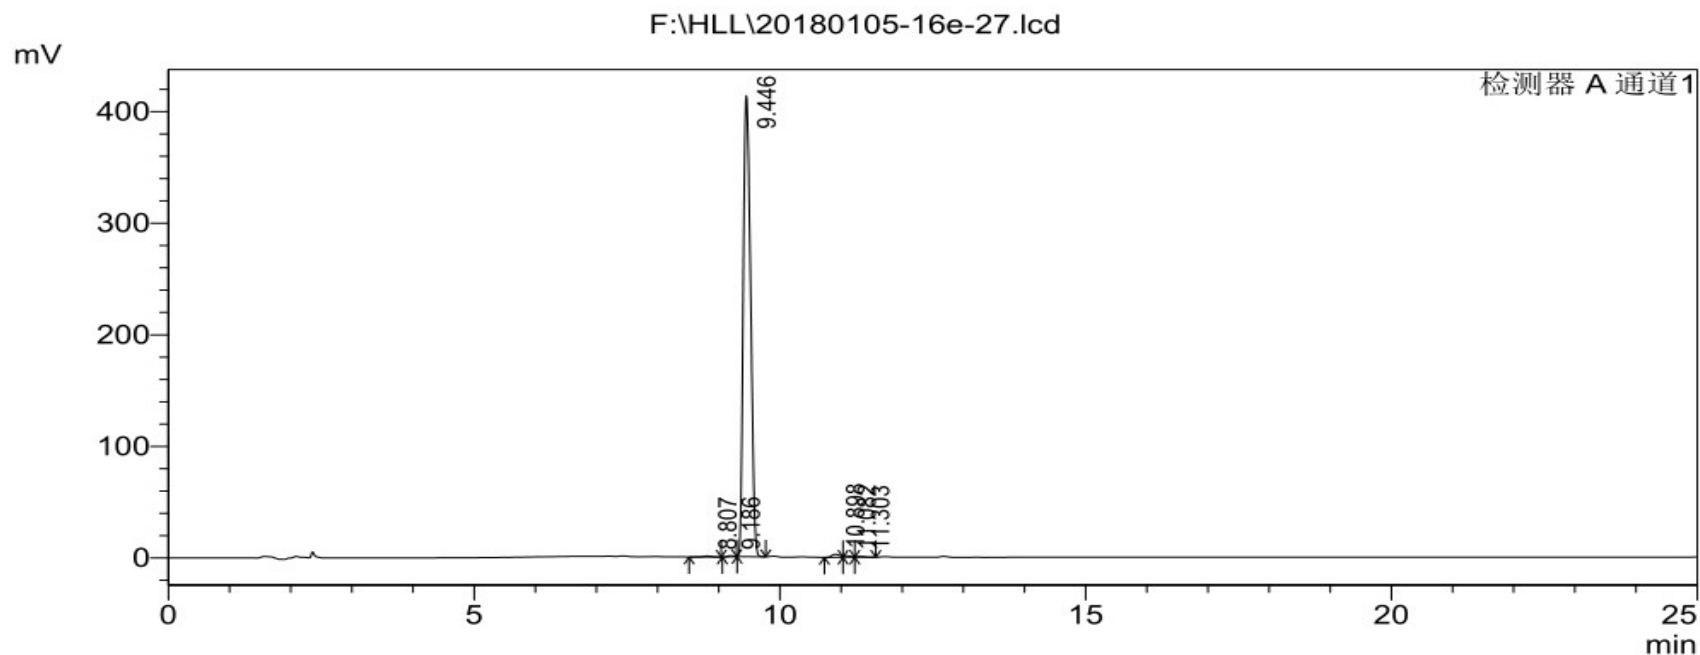

1 检测器 A 通道1/276nm

峰表

检测器 A Ch1 276nm

| 峰# | 保留时间   | 面积      | 高度     | 面积 %    | 高度 %    |
|----|--------|---------|--------|---------|---------|
| 1  | 8.807  | 10538   | 990    | 0.302   | 0.236   |
| 2  | 9.186  | 6848    | 988    | 0.196   | 0.235   |
| 3  | 9.446  | 3425827 | 413356 | 98.226  | 98.363  |
| 4  | 10.898 | 26072   | 2694   | 0.748   | 0.641   |
| 5  | 11.082 | 11249   | 1390   | 0.323   | 0.331   |
| 6  | 11.303 | 7167    | 815    | 0.206   | 0.194   |
| 总计 |        | 3487701 | 420233 | 100.000 | 100.000 |

**Compound 16f.**  $^1\text{H}$  NMR,  $\text{CDCl}_3$ , 500 MHz

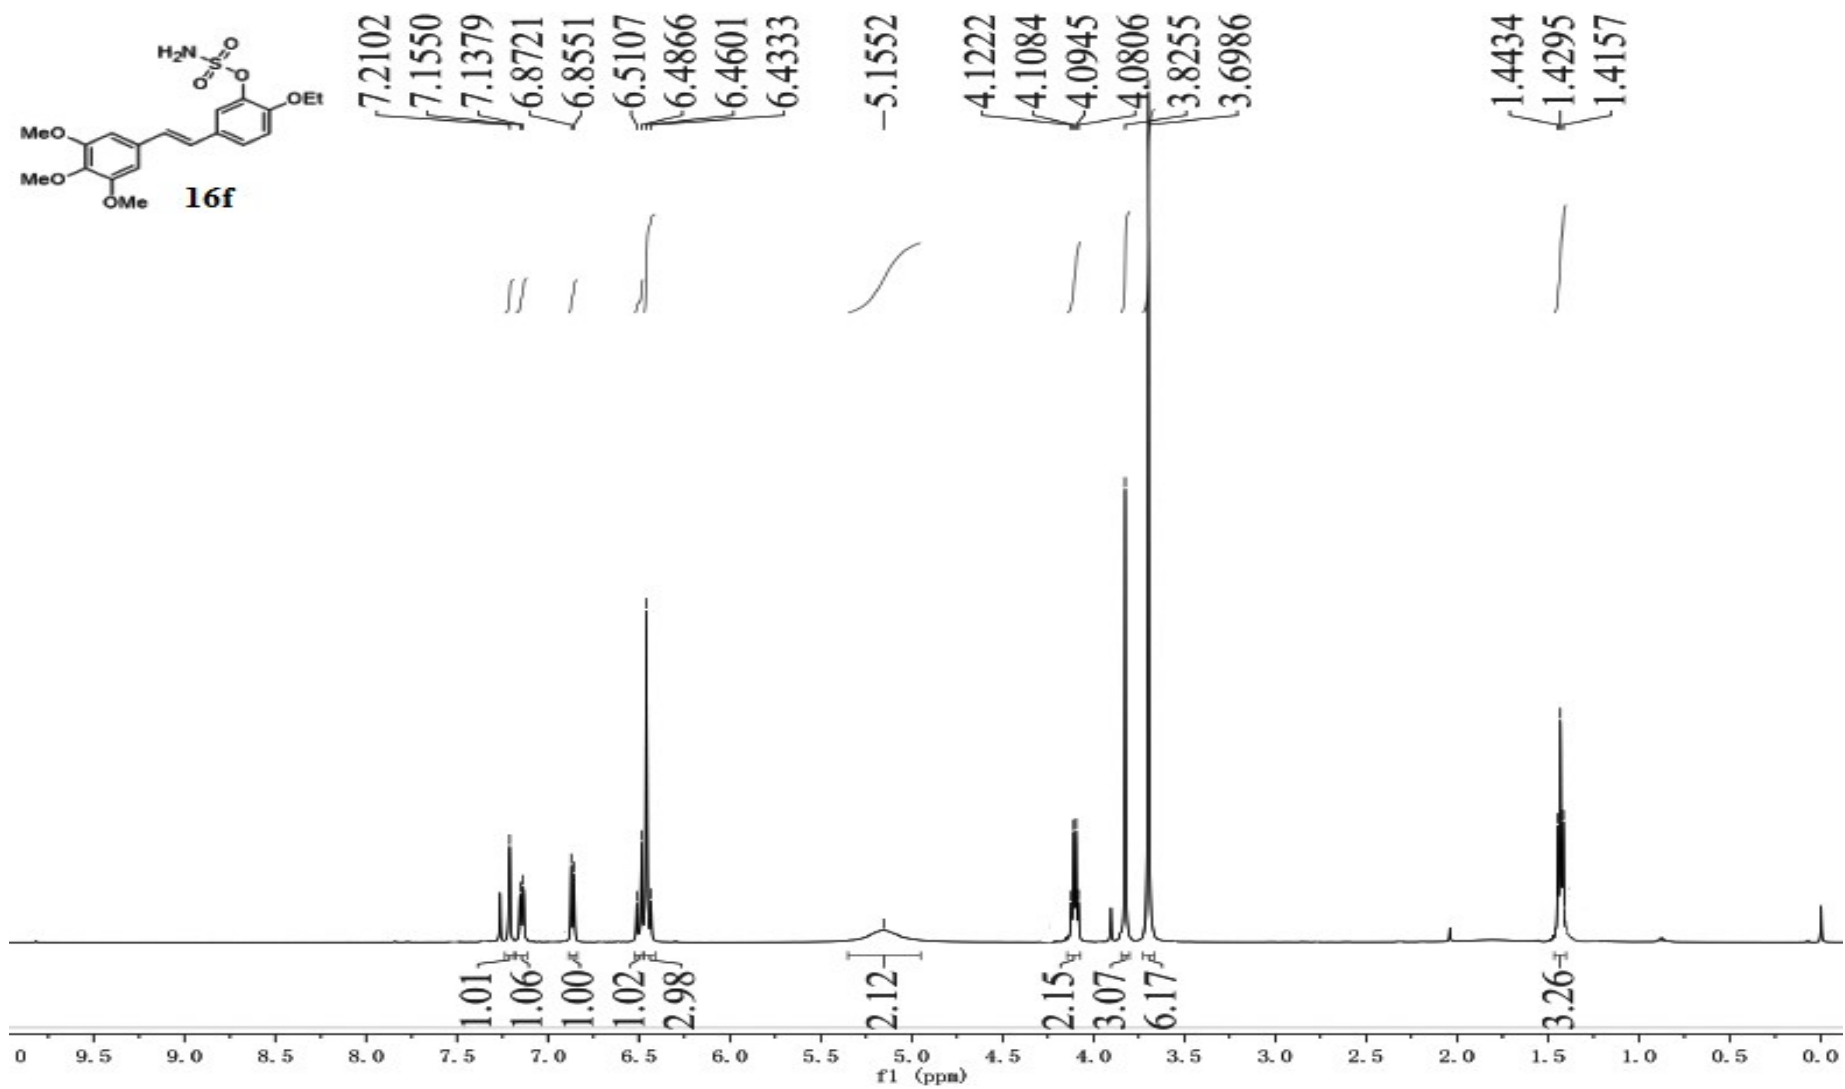

Compound **16f**. <sup>13</sup>C NMR, CDCl<sub>3</sub>, 125 MHz

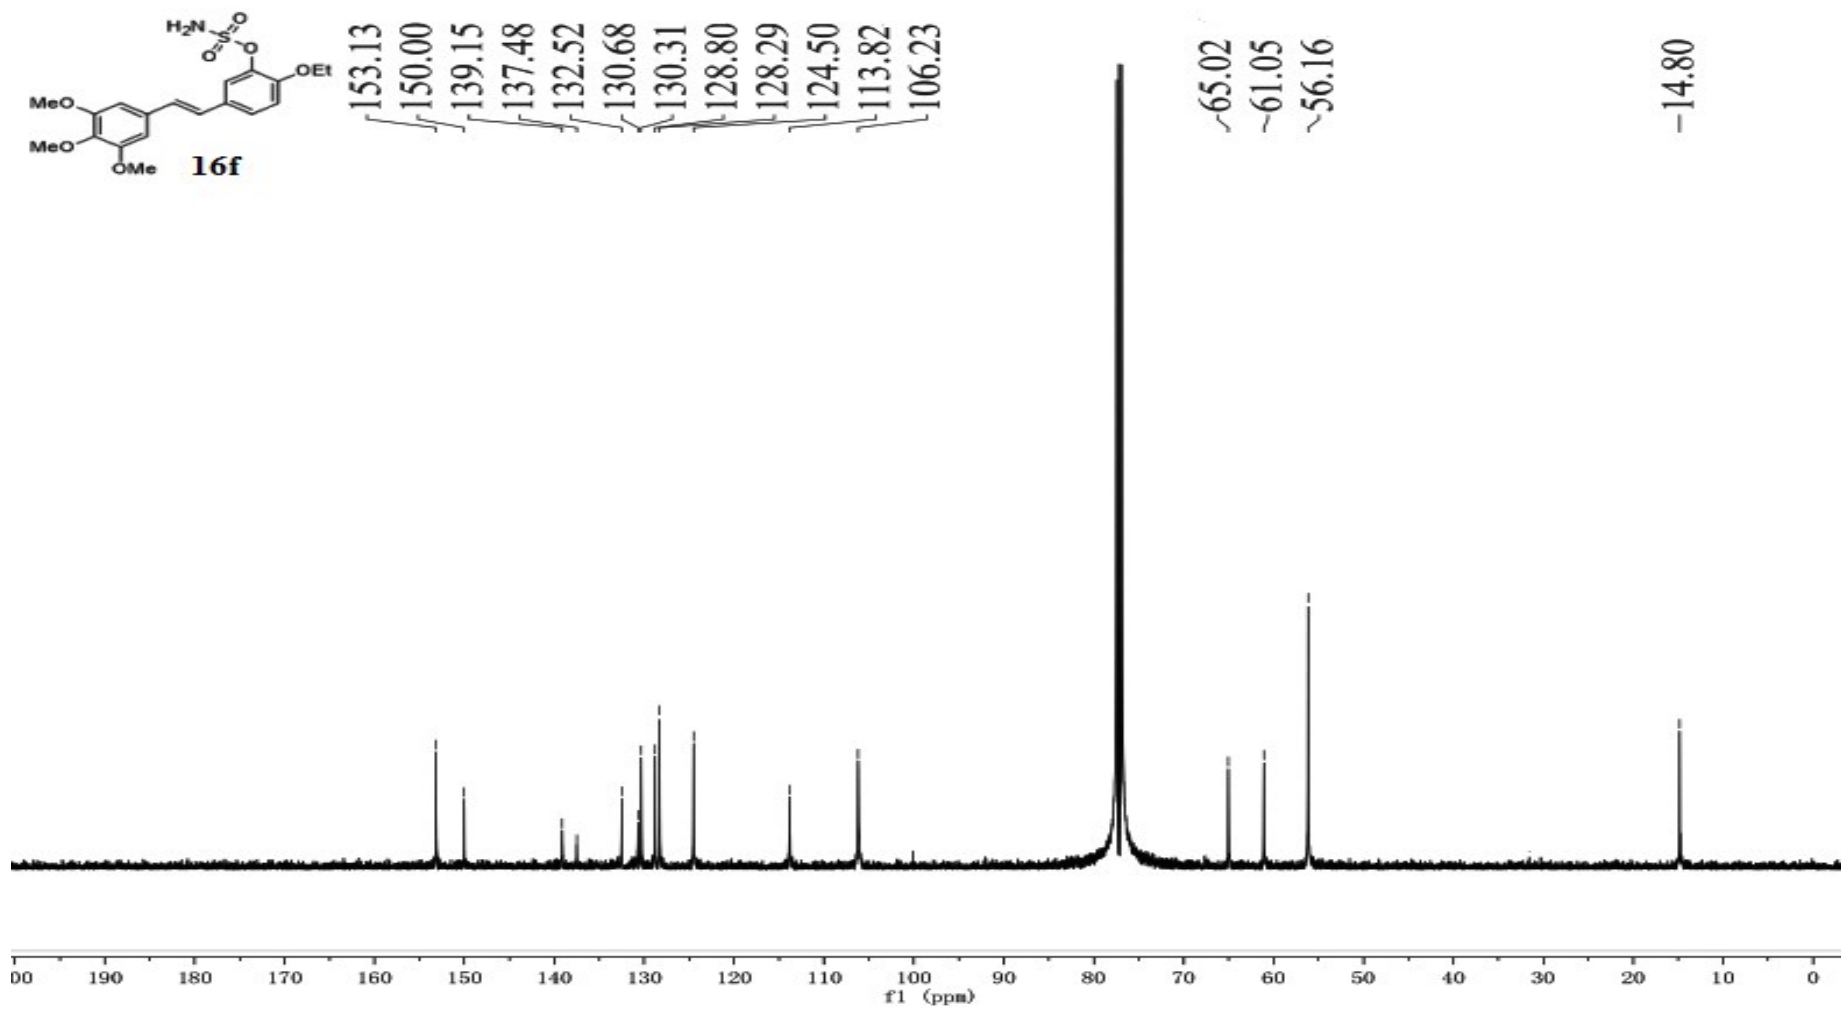

**HR-MS Spectrum of Compound 16f.**

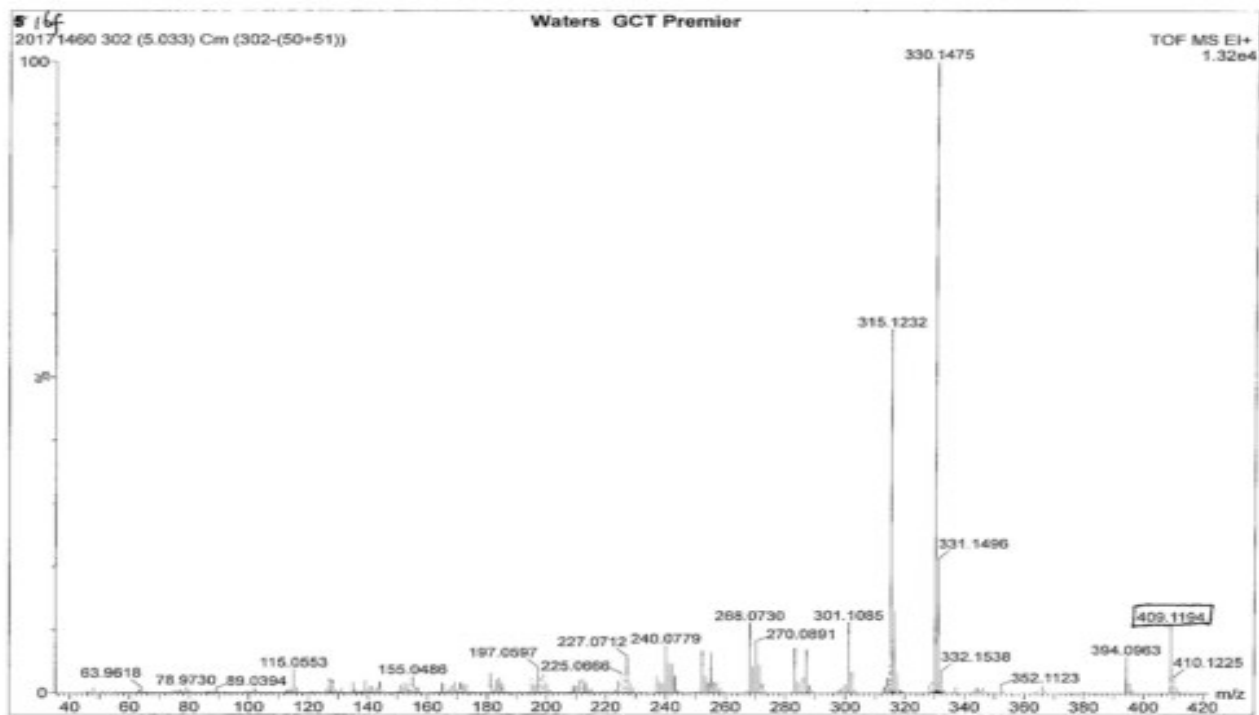

# HPLC Spectrum of Compound 16f

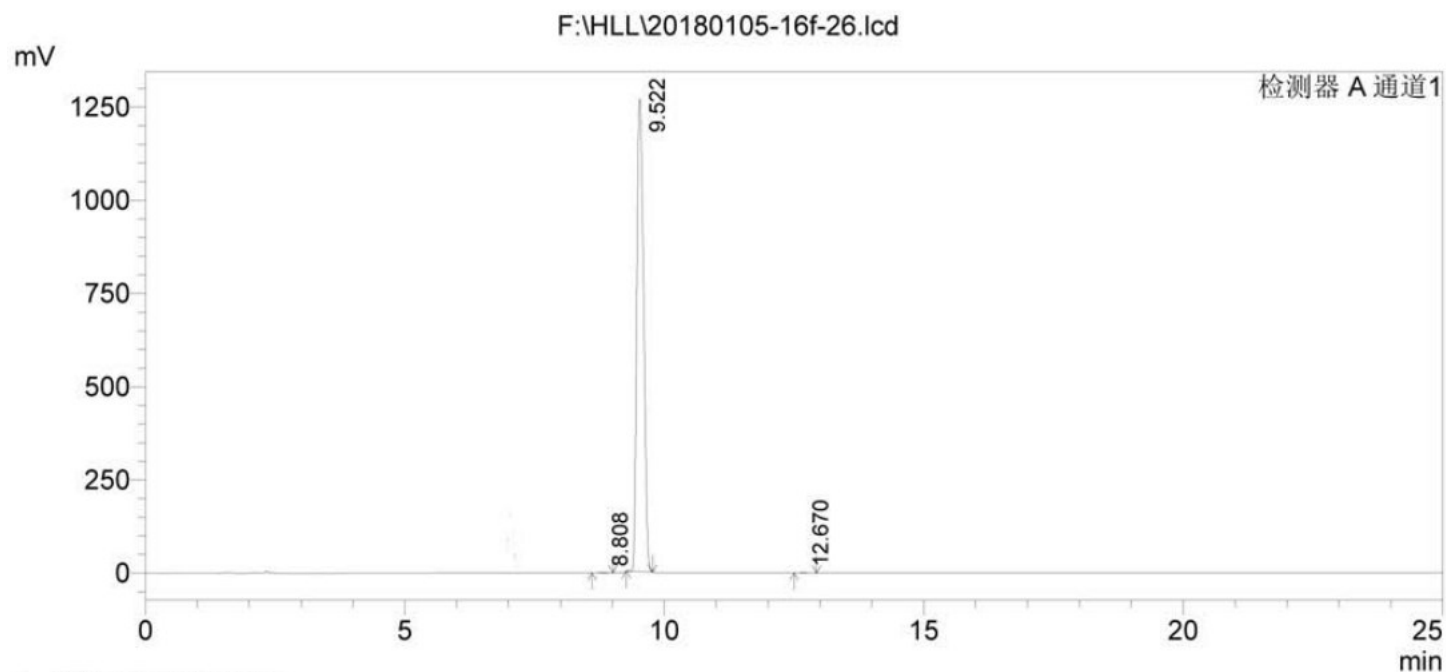

1 检测器 A 通道1/276nm

峰表

检测器 A Ch1 276nm

| 峰# | 保留时间   | 面积       | 高度      | 面积 %    | 高度 %    |
|----|--------|----------|---------|---------|---------|
| 1  | 8.808  | 10675    | 1159    | 0.093   | 0.091   |
| 2  | 9.522  | 11497680 | 1269609 | 99.823  | 99.816  |
| 3  | 12.670 | 9737     | 1175    | 0.085   | 0.092   |
| 总计 |        | 11518092 | 1271943 | 100.000 | 100.000 |



**Compound 16g.**  $^1\text{H}$  NMR,  $\text{CDCl}_3$ , 500 MHz

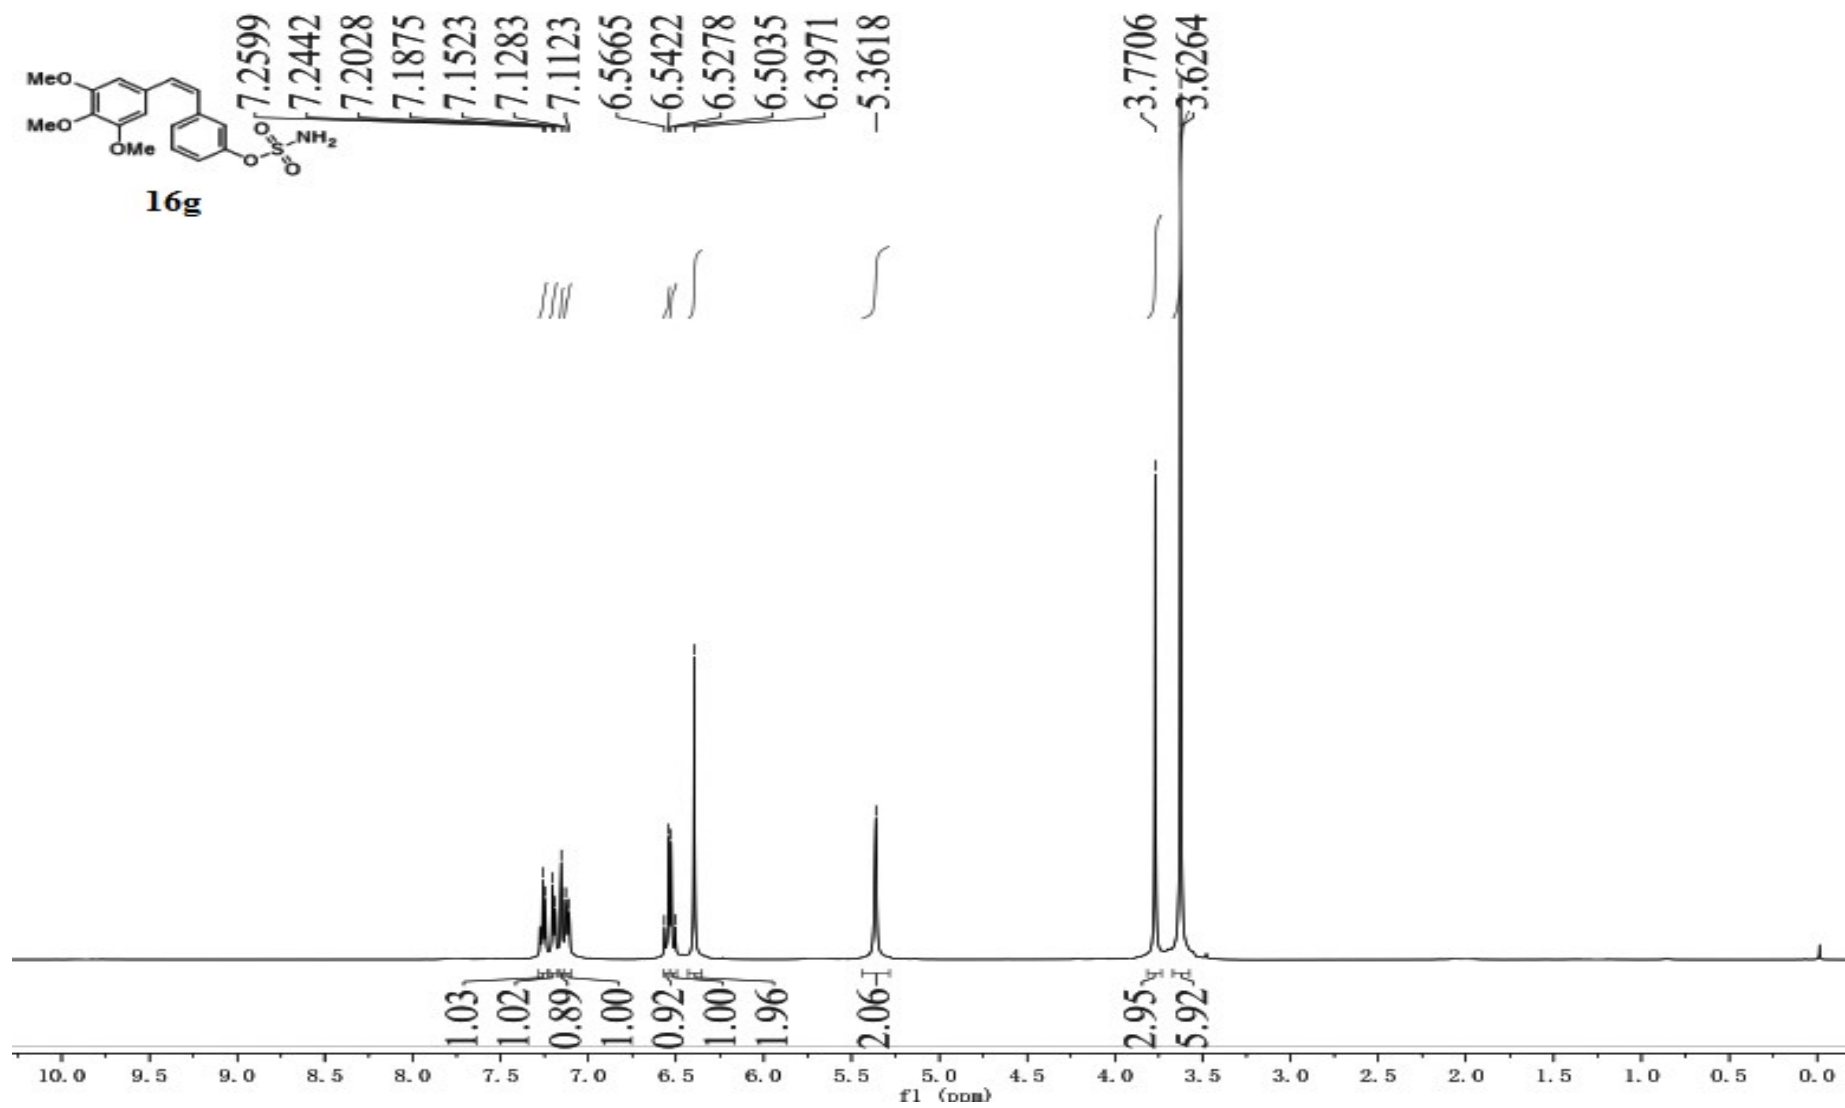

**Compound 16g.**  $^{13}\text{C}$  NMR,  $\text{CDCl}_3$ , 125 MHz

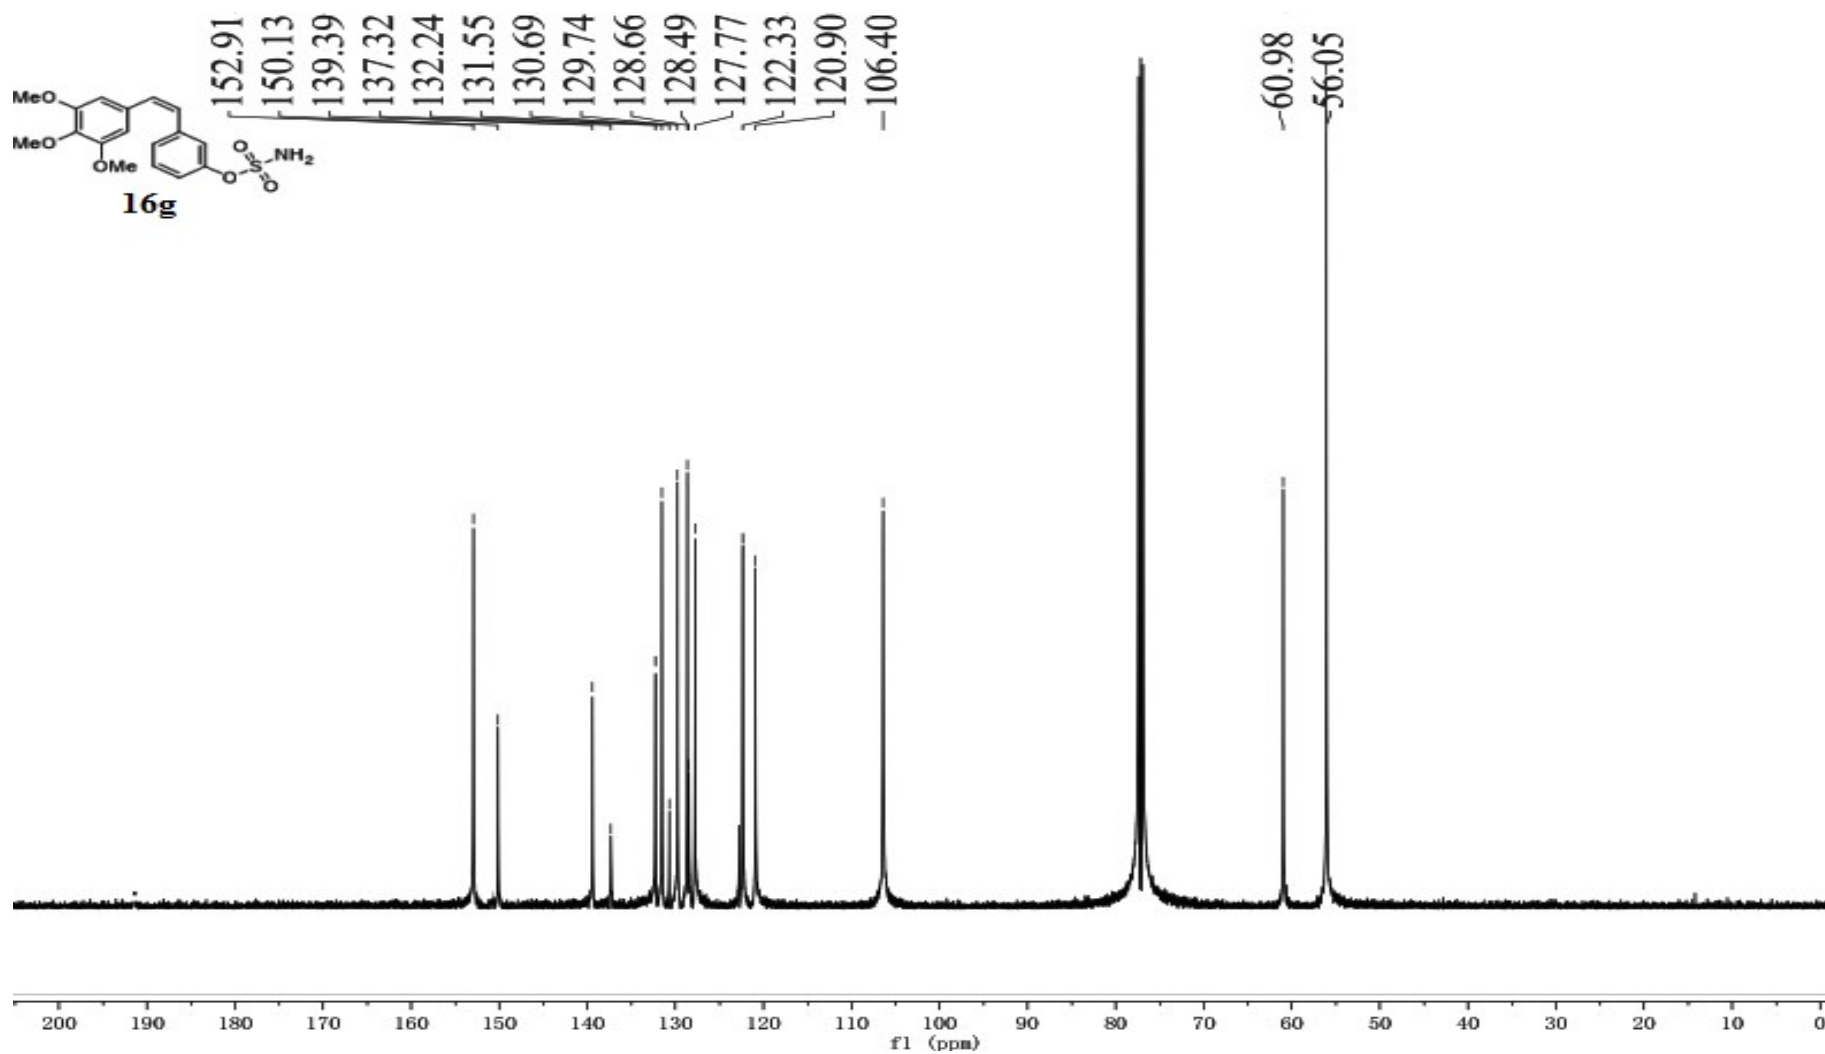

**HR-MS Spectrum of Compound 16g**

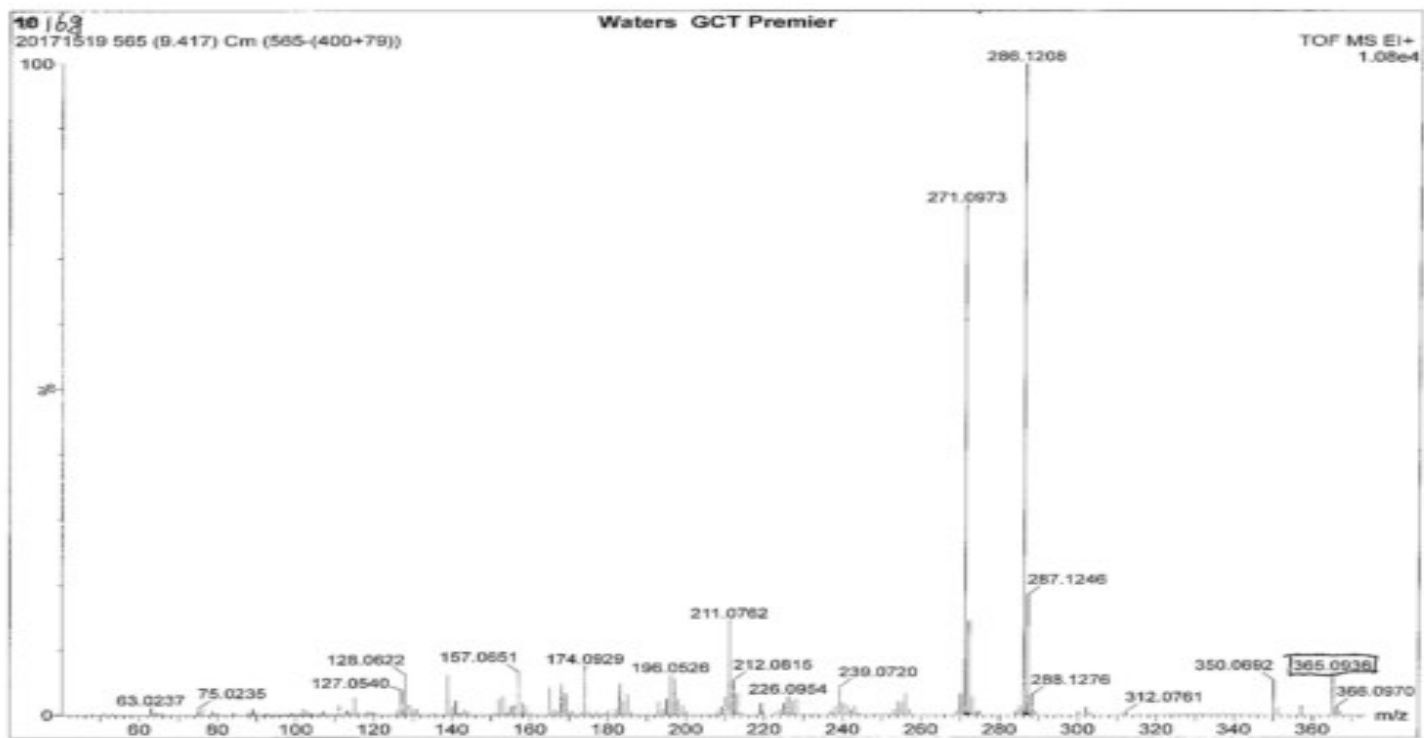

**HPLC Spectrum of Compound 16g**

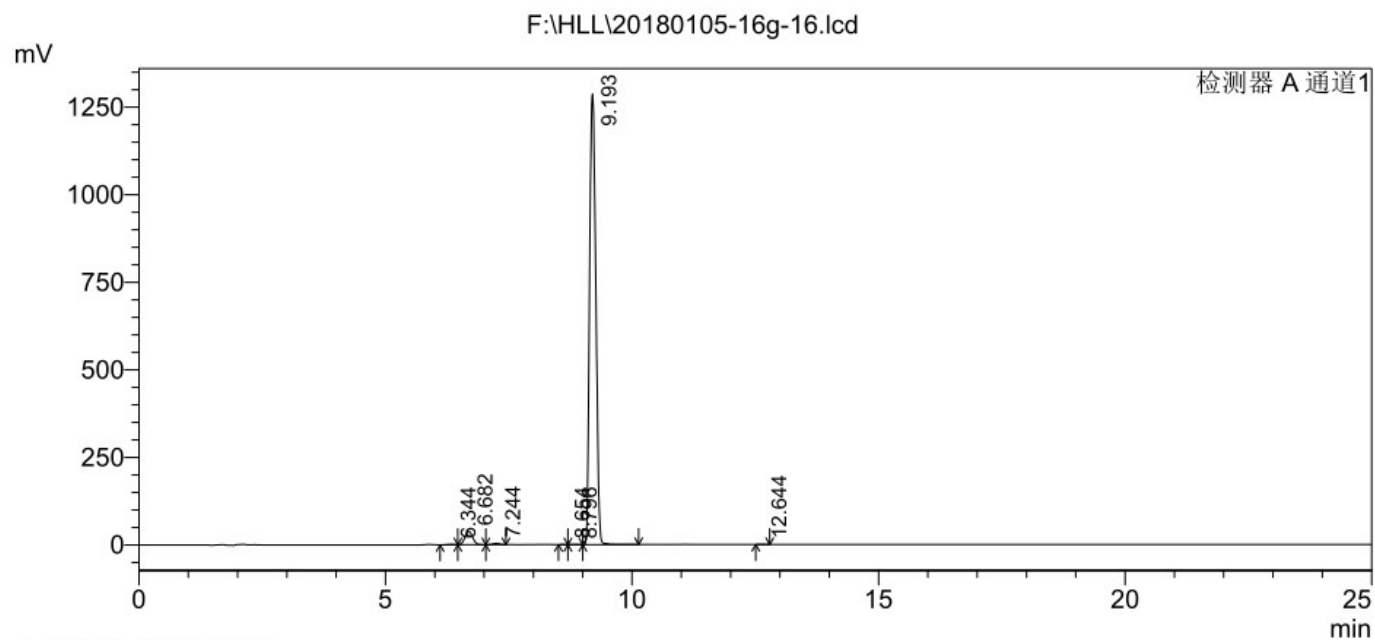

峰表

检测器 A Ch1 276nm

| 峰# | 保留时间   | 面积       | 高度      | 面积 %    | 高度 %    |
|----|--------|----------|---------|---------|---------|
| 1  | 6.344  | 12526    | 1068    | 0.107   | 0.080   |
| 2  | 6.682  | 414643   | 38084   | 3.538   | 2.862   |
| 3  | 7.244  | 32215    | 3347    | 0.275   | 0.252   |
| 4  | 8.654  | 2151     | 297     | 0.018   | 0.022   |
| 5  | 8.796  | 4645     | 441     | 0.040   | 0.033   |
| 6  | 9.193  | 11249758 | 1287105 | 95.999  | 96.726  |
| 7  | 12.644 | 2689     | 334     | 0.023   | 0.025   |
| 总计 |        | 11718626 | 1330675 | 100.000 | 100.000 |

Compound 16h.  $^1\text{H}$  NMR,  $\text{CDCl}_3$ , 500 MHz

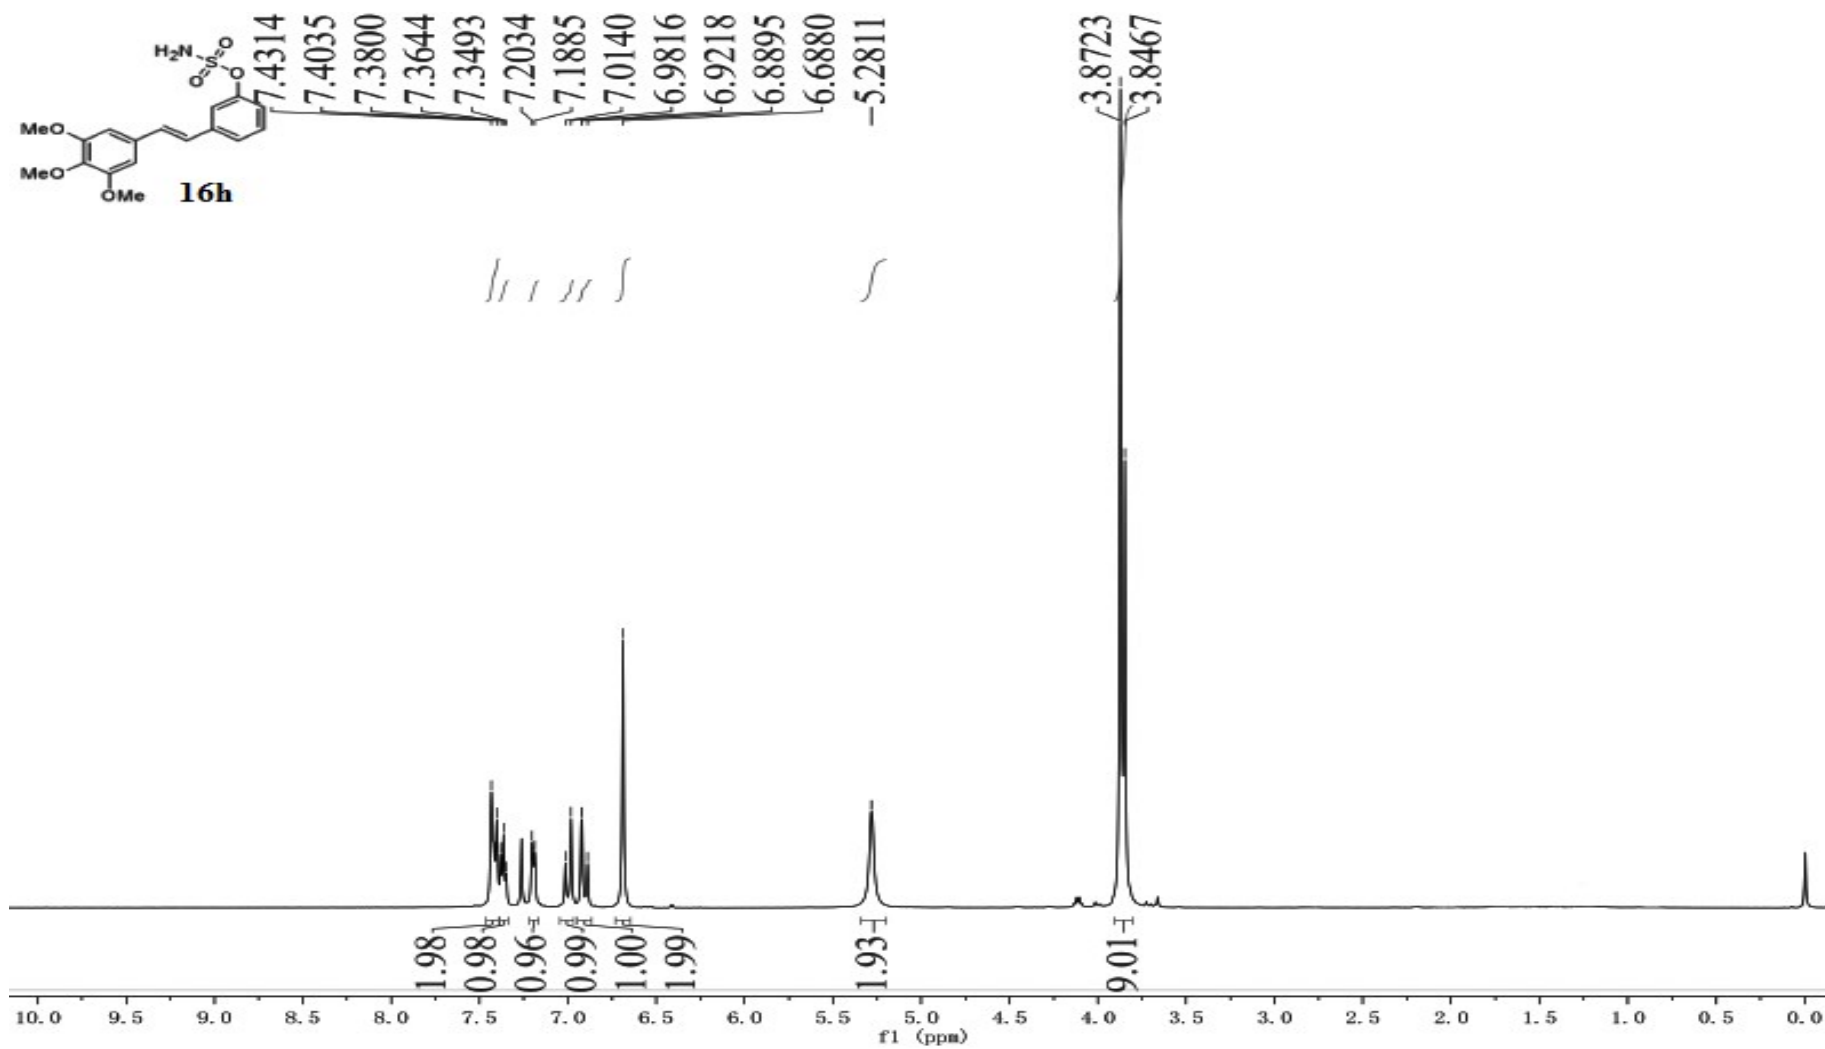

**Compound 16h.** <sup>13</sup>C NMR, CDCl<sub>3</sub>, 125 MHz



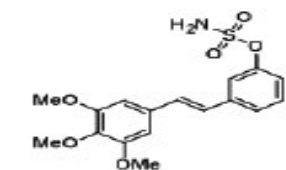

16h

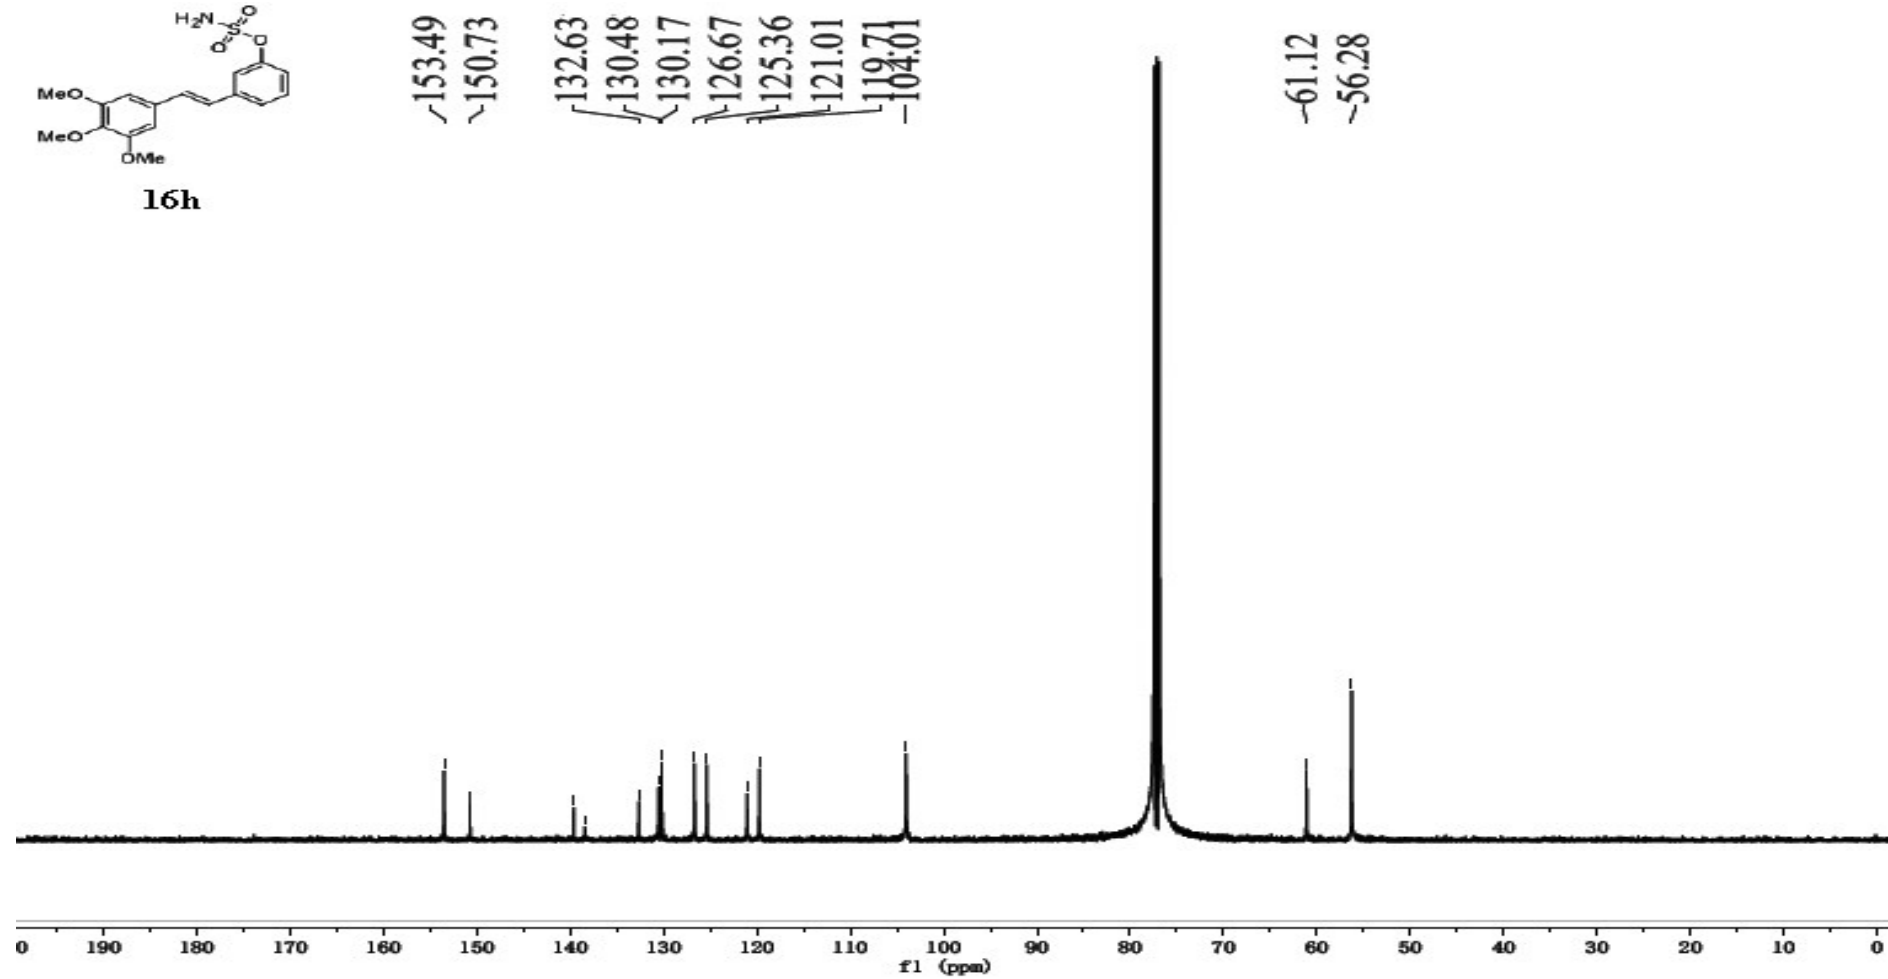

HR-MS Spectrum of Compound 16h

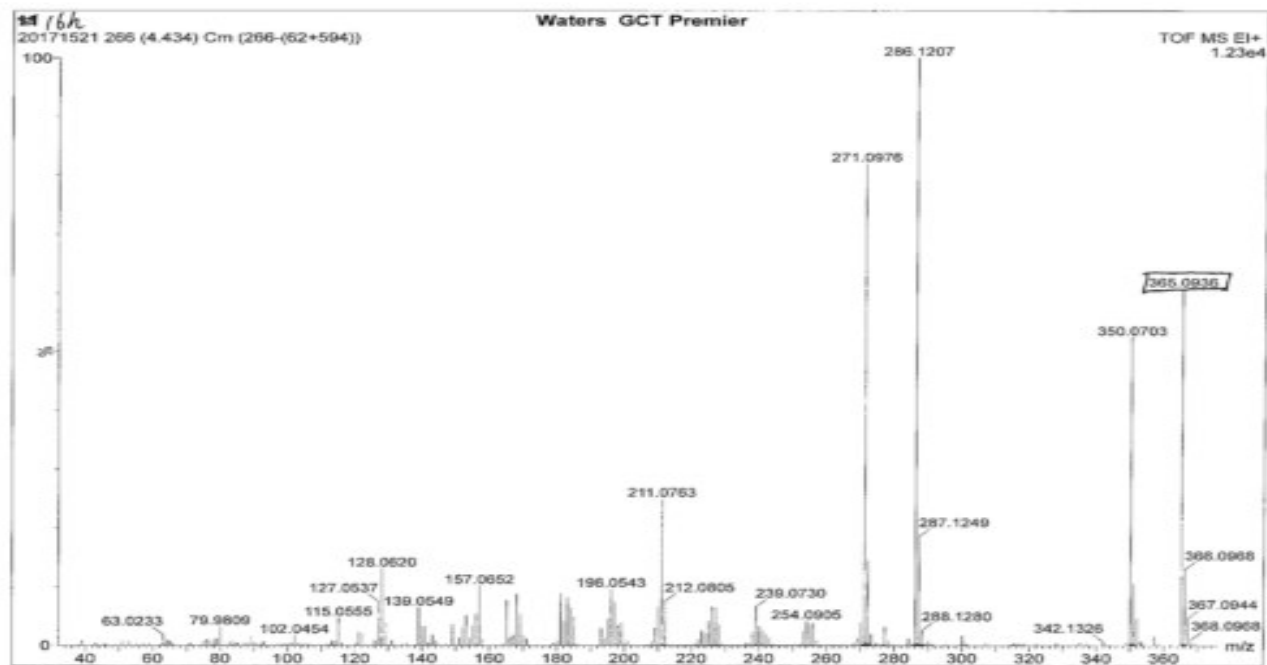



# HPLC Spectrum of Compound 16h

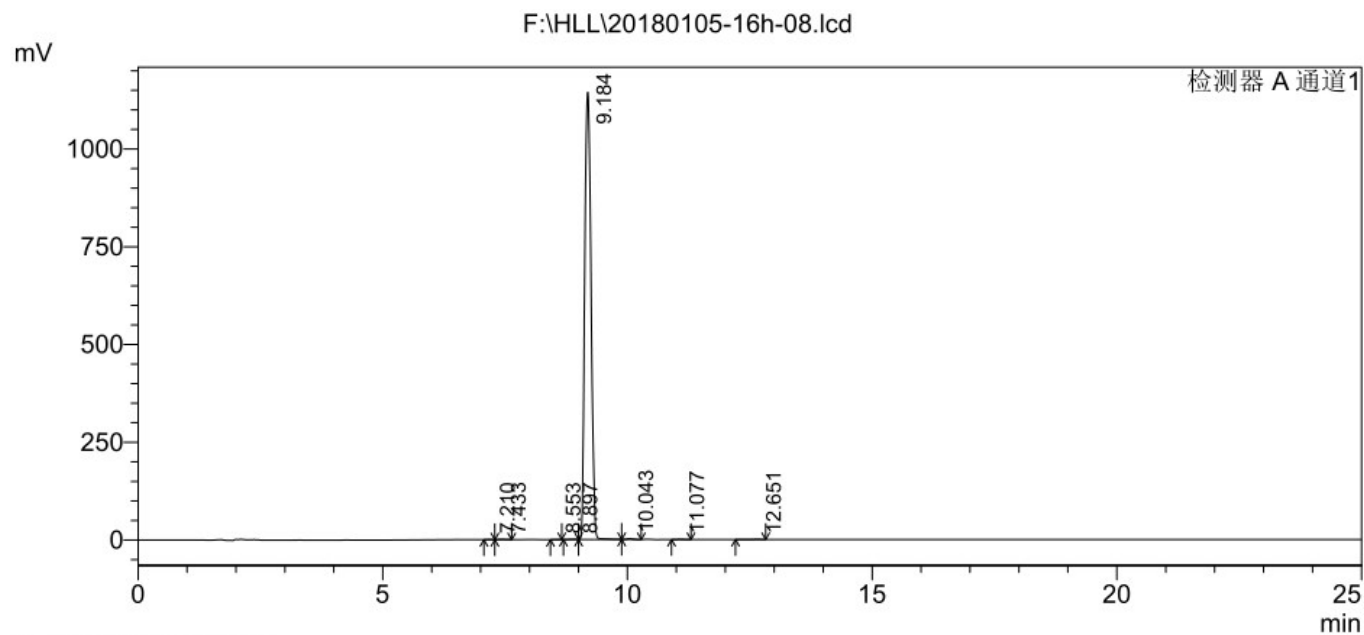

1 检测器 A 通道1/276nm

峰表

检测器 A Ch1 276nm

| 峰# | 保留时间   | 面积       | 高度      | 面积 %    | 高度 %    |
|----|--------|----------|---------|---------|---------|
| 1  | 7.210  | 2191     | 272     | 0.021   | 0.024   |
| 2  | 7.433  | 8018     | 813     | 0.078   | 0.071   |
| 3  | 8.553  | 541      | 67      | 0.005   | 0.006   |
| 4  | 8.897  | 4617     | 427     | 0.045   | 0.037   |
| 5  | 9.184  | 10221479 | 1143653 | 99.580  | 99.591  |
| 6  | 10.043 | 16395    | 1949    | 0.160   | 0.170   |
| 7  | 11.077 | 5398     | 600     | 0.053   | 0.052   |
| 8  | 12.651 | 5914     | 574     | 0.058   | 0.050   |
| 总计 |        | 10264552 | 1148355 | 100.000 | 100.000 |

Compound 16i. <sup>1</sup>H NMR, CDCl<sub>3</sub>, 500 MHz

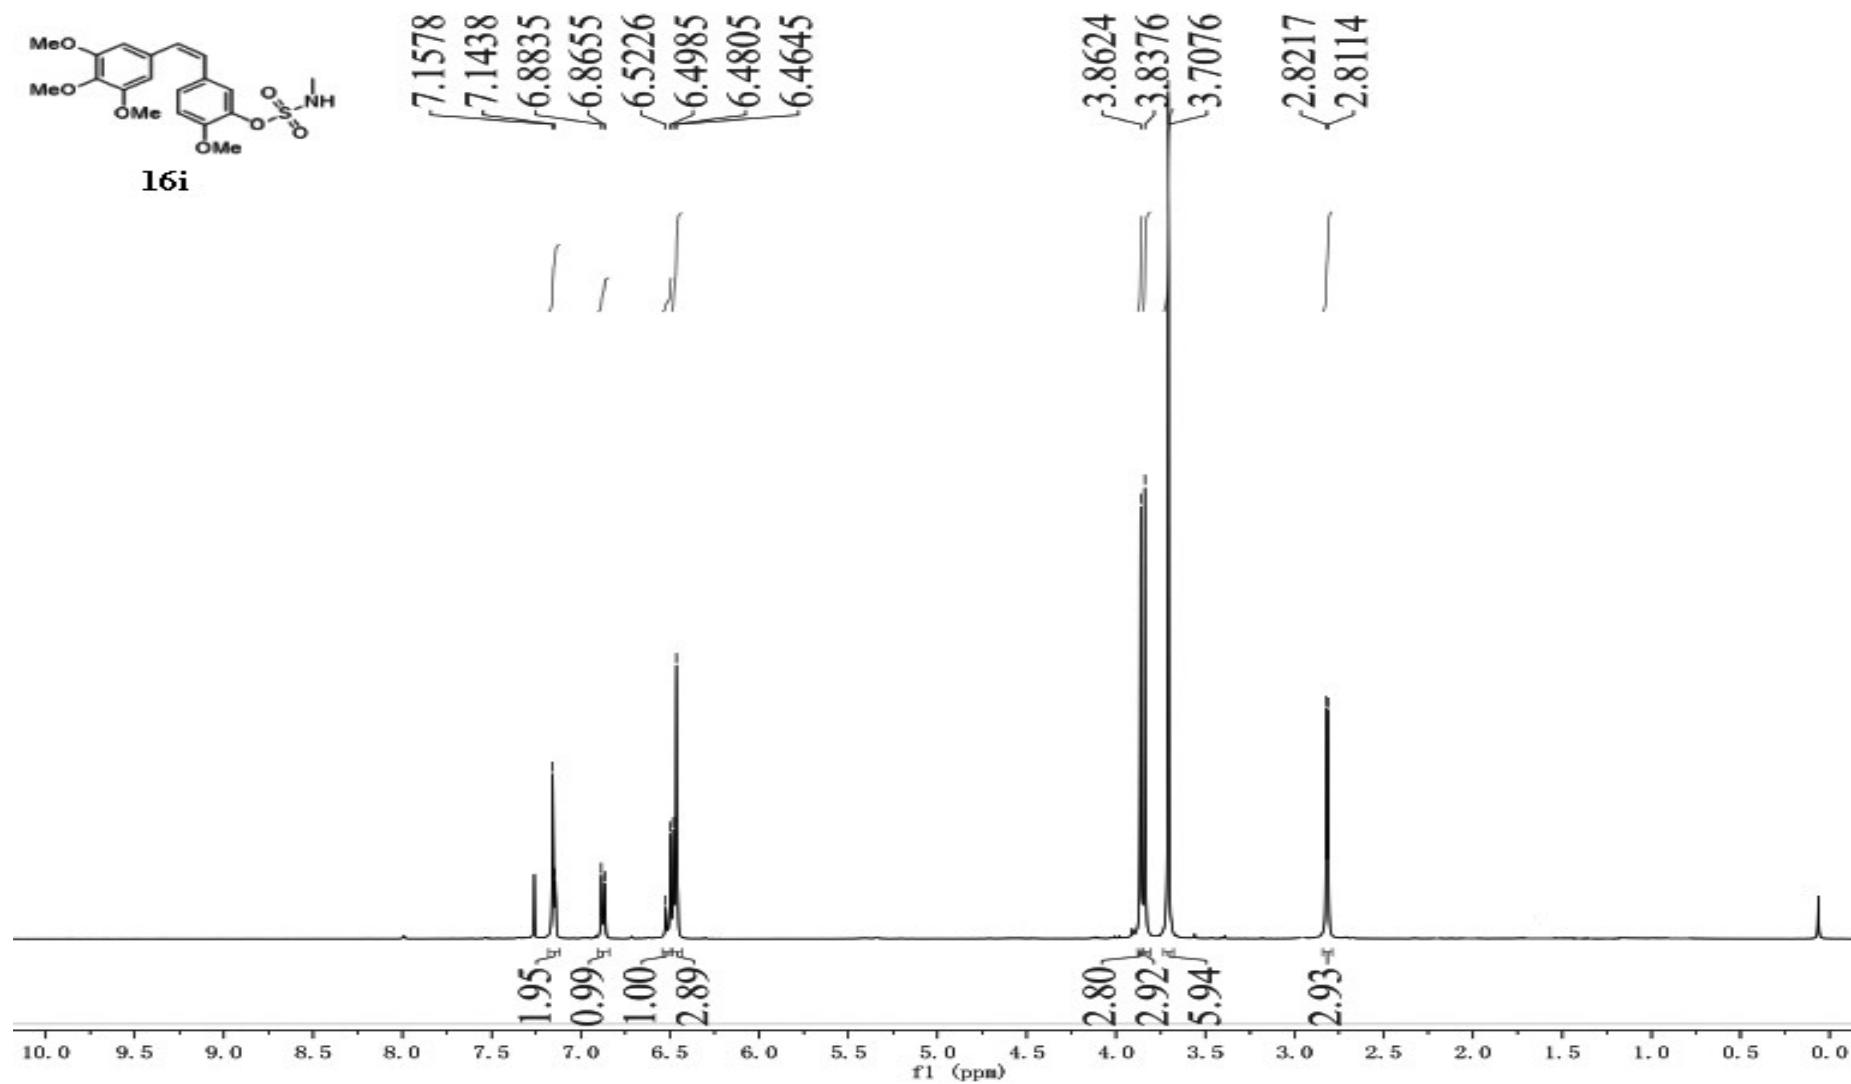

Compound 16i. <sup>13</sup>C NMR, CDCl<sub>3</sub>, 125 MHz

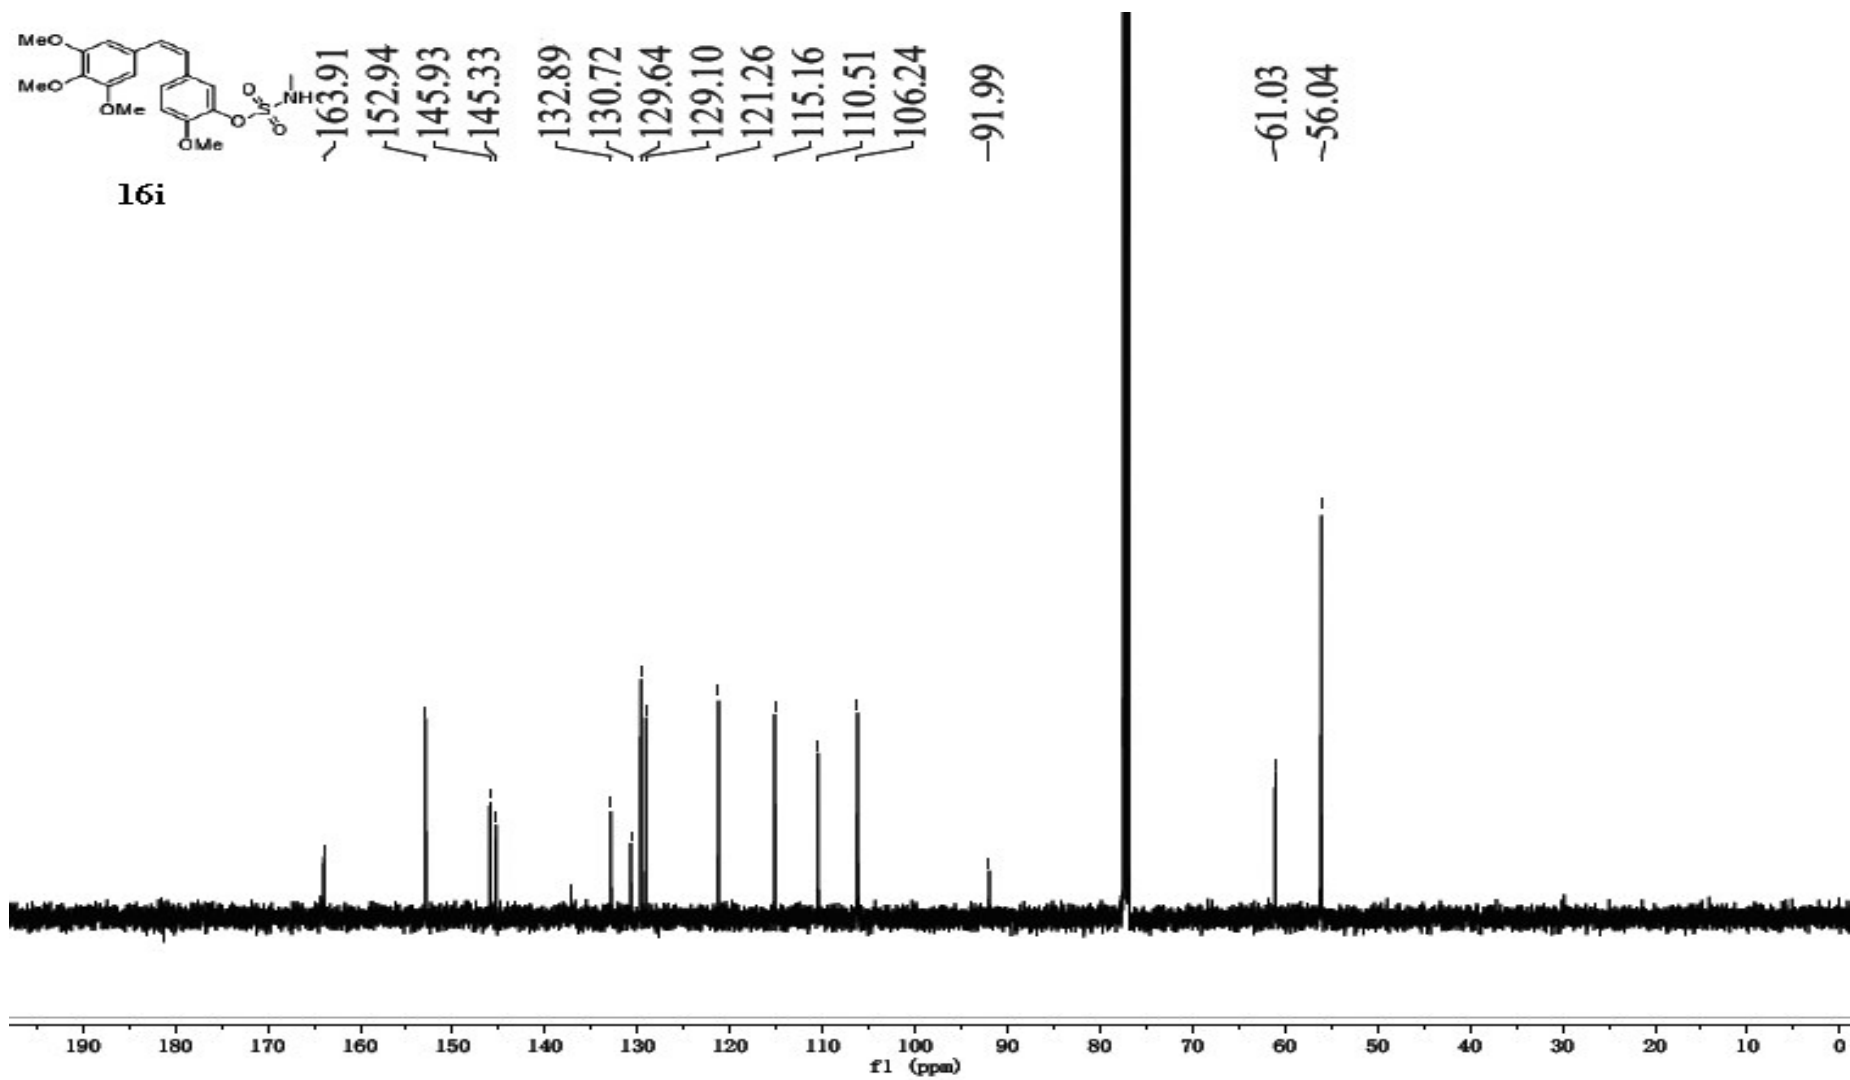

**HR-MS Spectrum of Compound 16i**

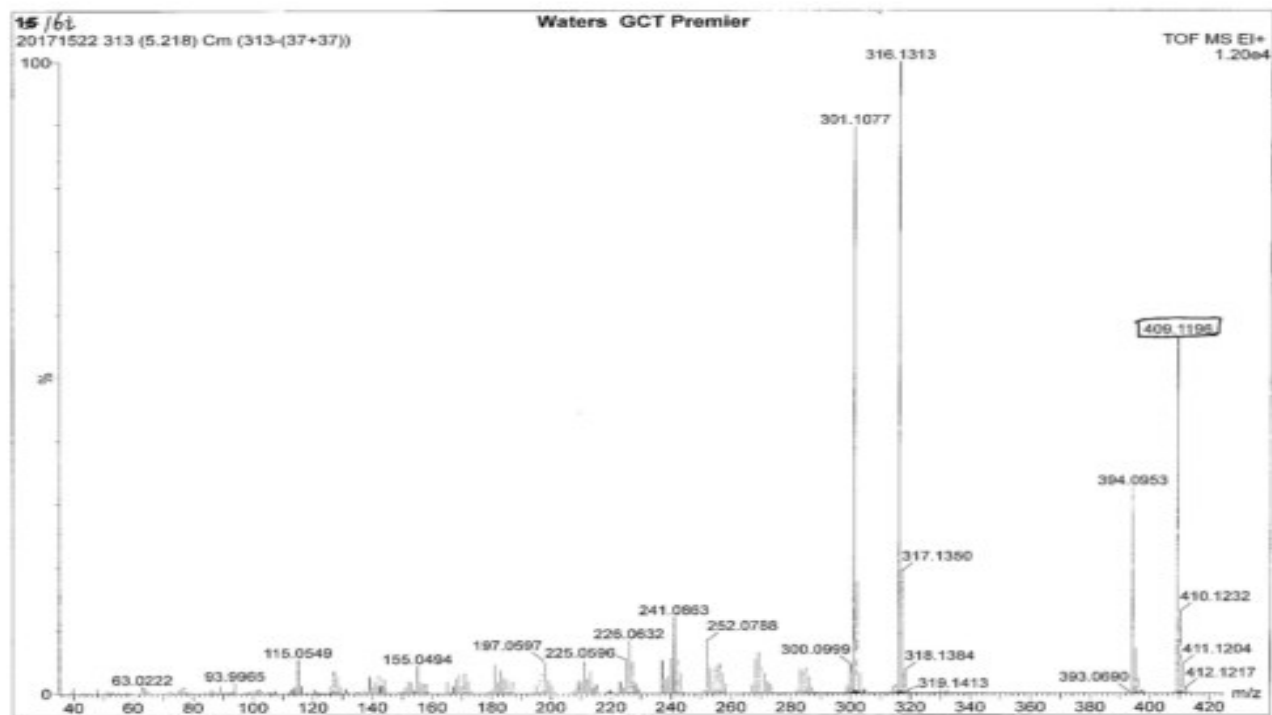



# HPLC Spectrum of Compound 16i

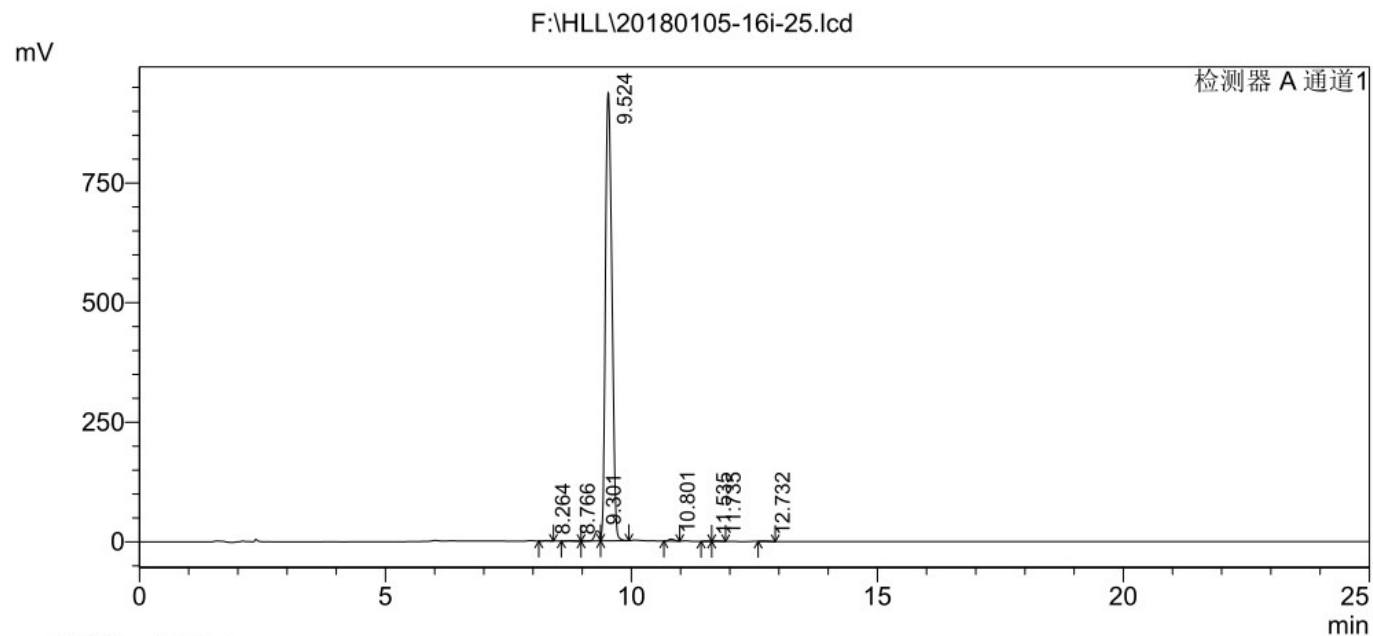

1 检测器 A 通道1/276nm

峰表

检测器 A Ch1 276nm

| 峰# | 保留时间   | 面积      | 高度     | 面积 %    | 高度 %    |
|----|--------|---------|--------|---------|---------|
| 1  | 8.264  | 8322    | 1039   | 0.094   | 0.107   |
| 2  | 8.766  | 9019    | 748    | 0.102   | 0.077   |
| 3  | 9.301  | 163247  | 21183  | 1.850   | 2.187   |
| 4  | 9.524  | 8578025 | 938128 | 97.230  | 96.859  |
| 5  | 10.801 | 35031   | 4162   | 0.397   | 0.430   |
| 6  | 11.535 | 6253    | 789    | 0.071   | 0.081   |
| 7  | 11.735 | 10326   | 1158   | 0.117   | 0.120   |
| 8  | 12.732 | 12142   | 1341   | 0.138   | 0.138   |
| 总计 |        | 8822365 | 968548 | 100.000 | 100.000 |

Compound 16j. <sup>1</sup>H NMR, CDCl<sub>3</sub>, 500 MHz

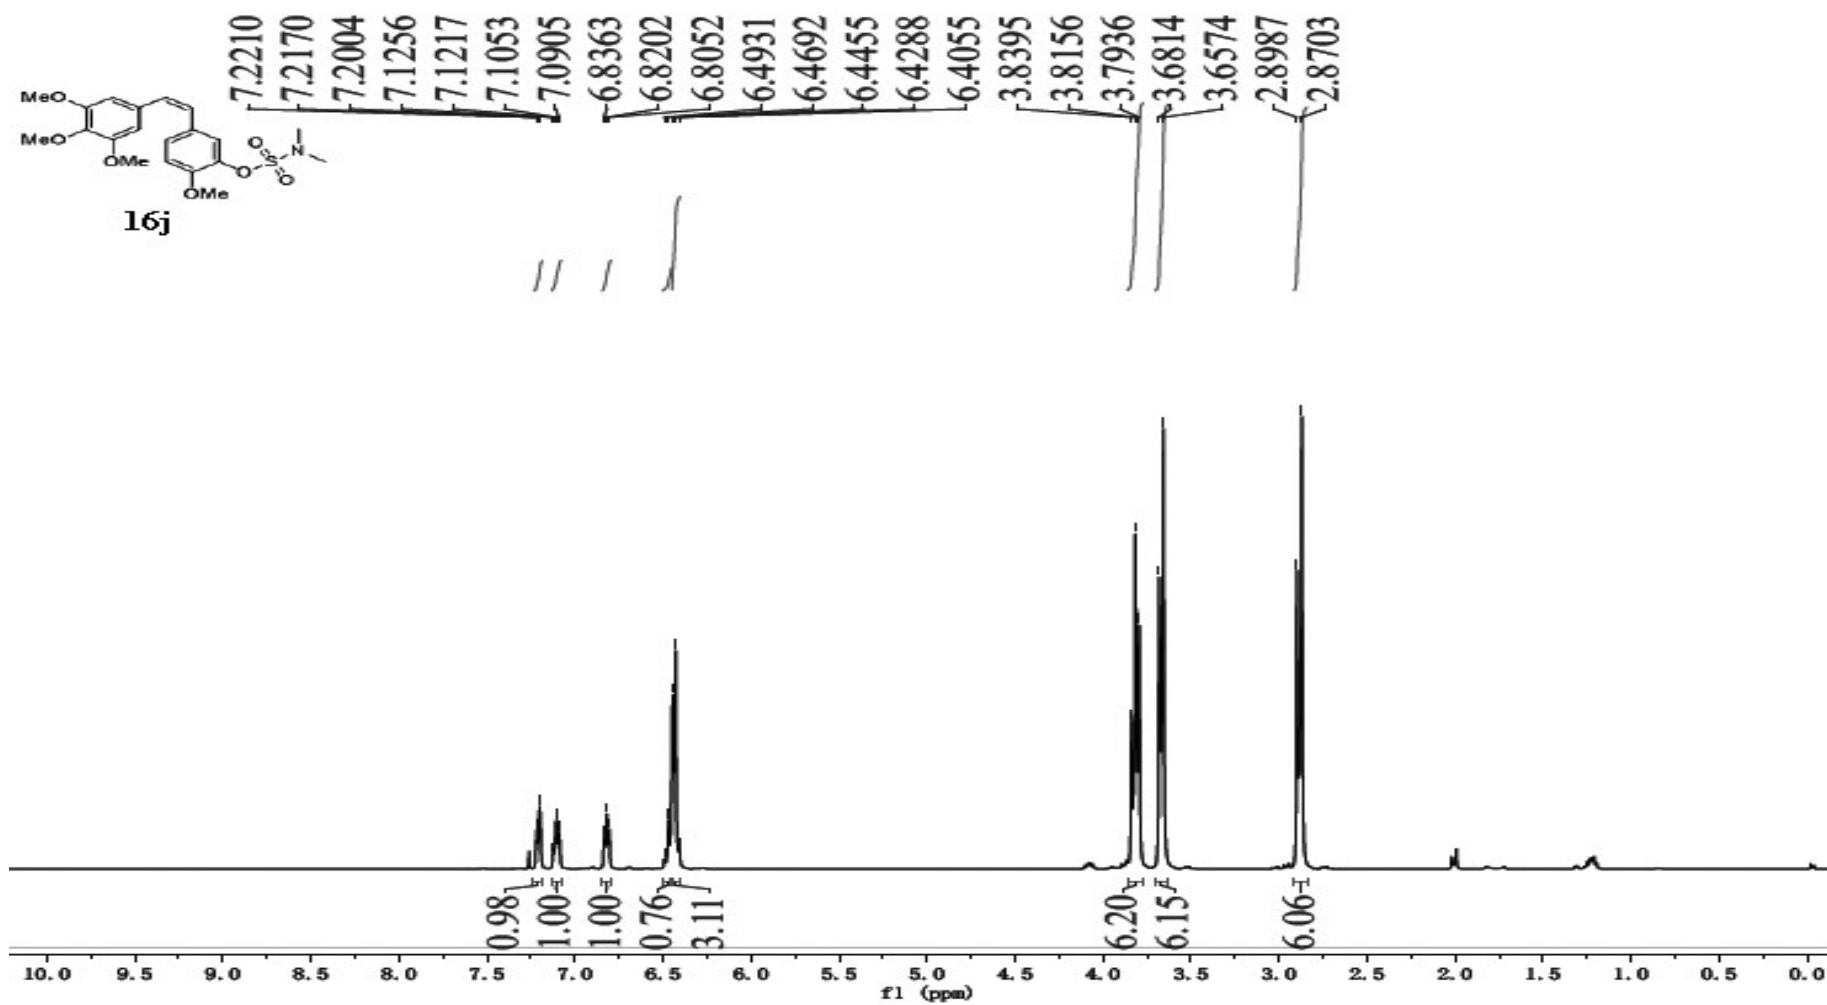

Compound 16j.  $^{13}\text{C}$  NMR,  $\text{CDCl}_3$ , 125 MHz

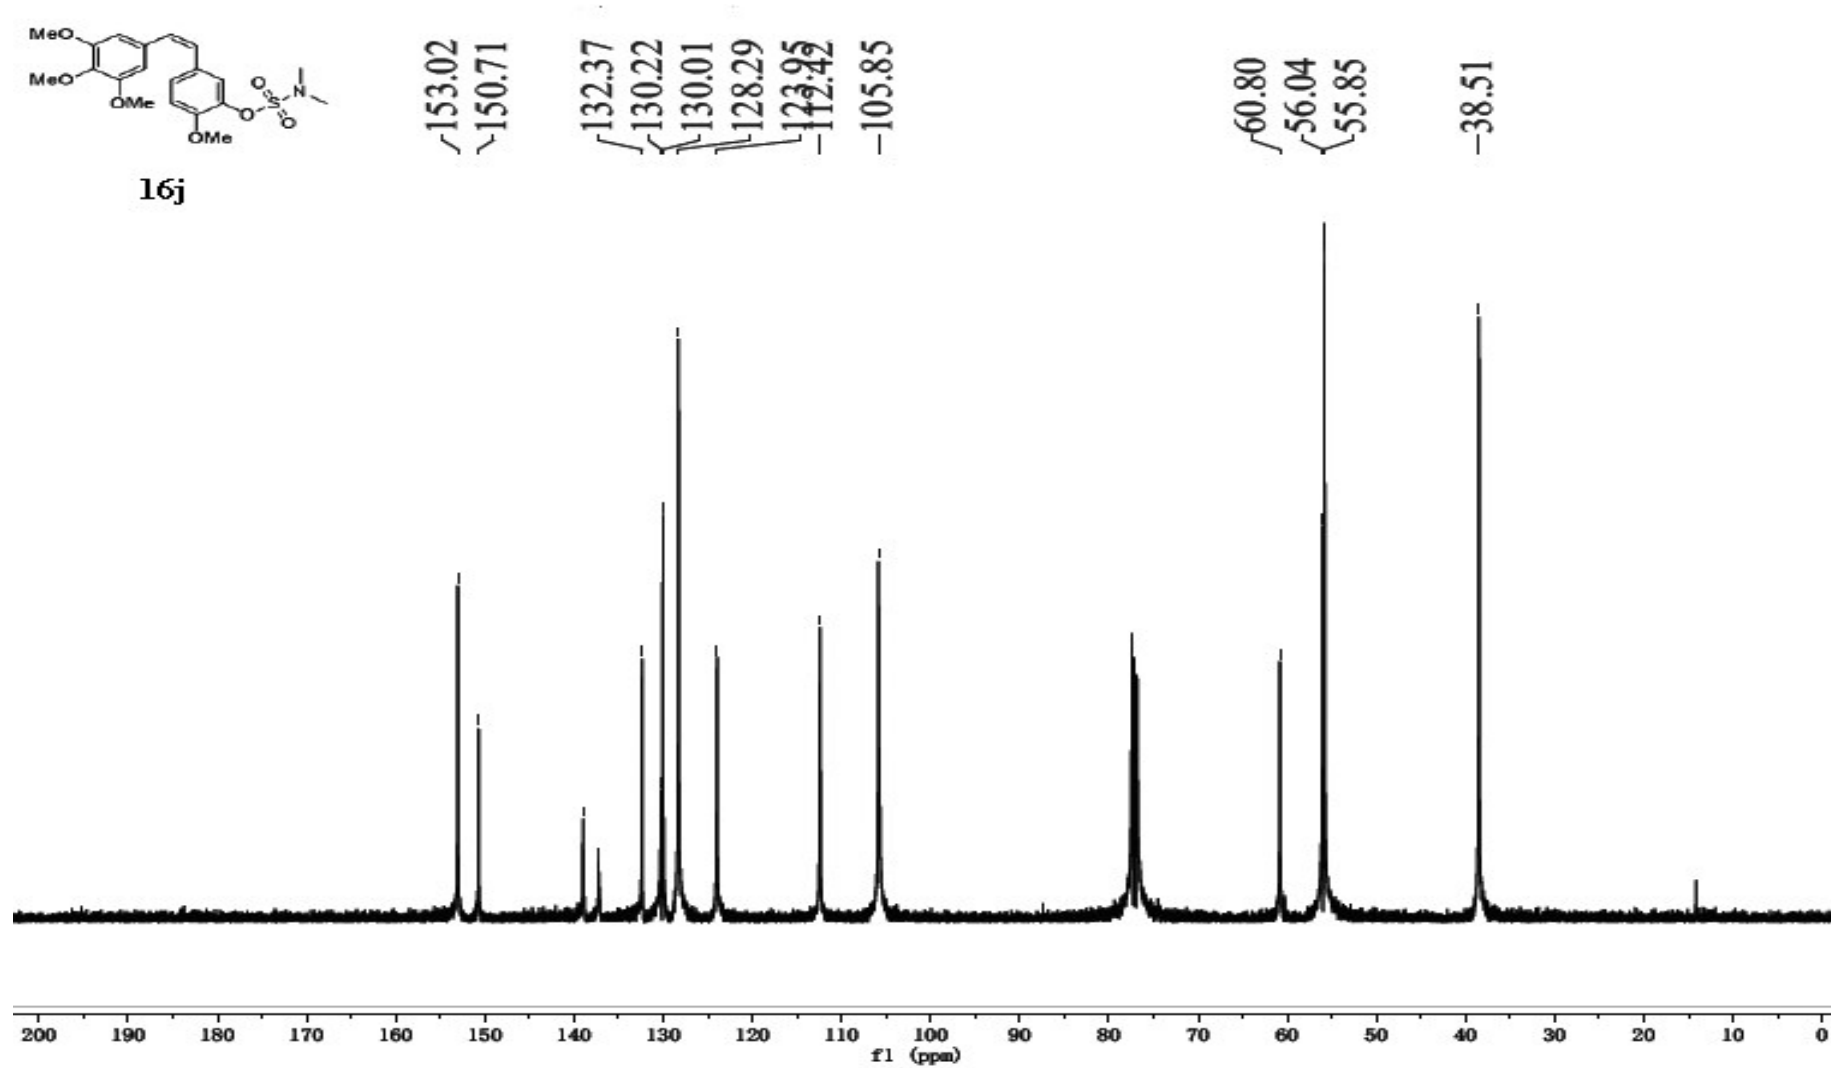

**HR-MS Spectrum of Compound 16j**

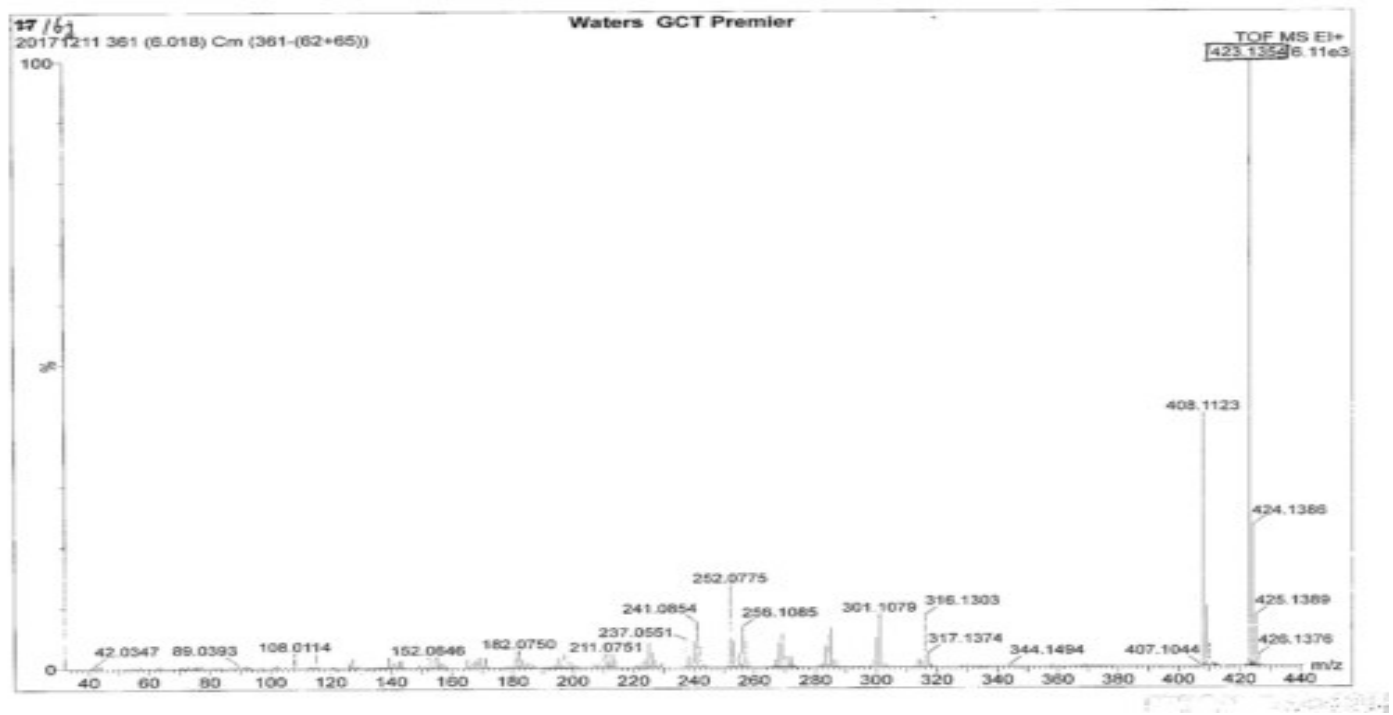

**HPLC Spectrum of Compound 16j**

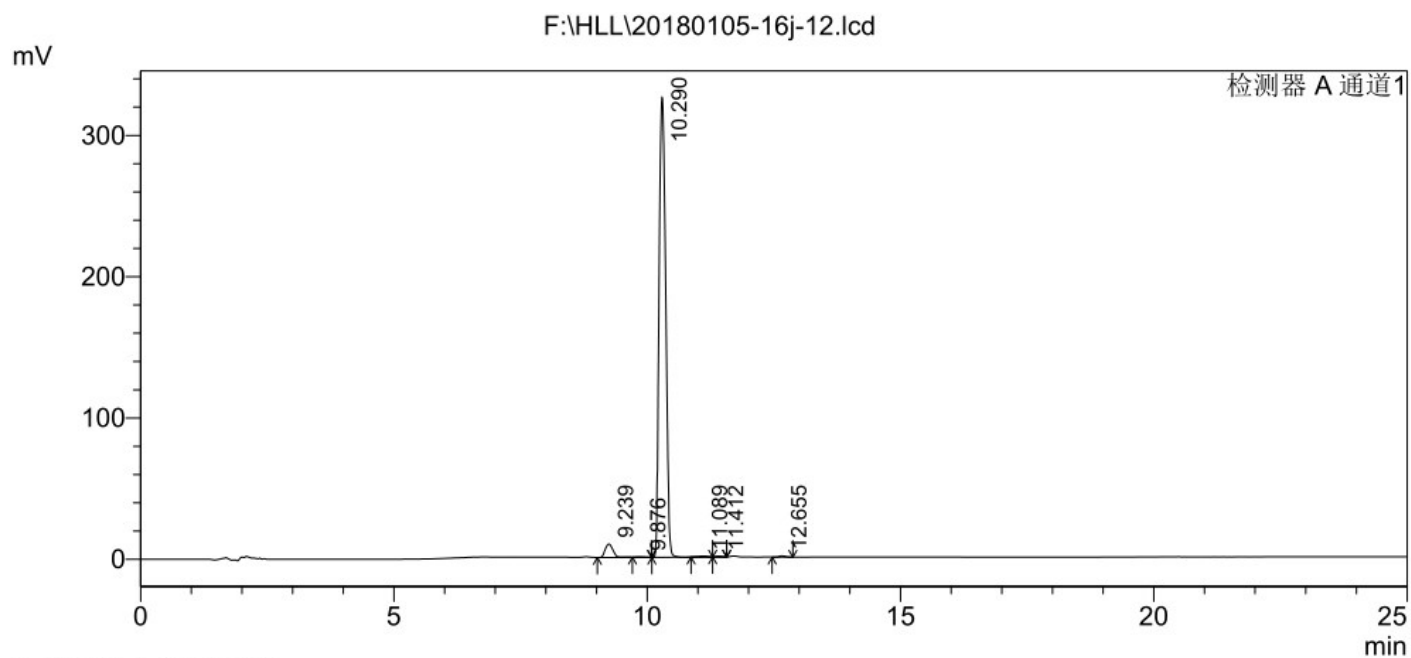

1 检测器 A 通道1/276nm

峰表

| 检测器 A Ch1 276nm |        |         |        |         |         |
|-----------------|--------|---------|--------|---------|---------|
| 峰#              | 保留时间   | 面积      | 高度     | 面积 %    | 高度 %    |
| 1               | 9.239  | 106616  | 9525   | 3.474   | 2.819   |
| 2               | 9.876  | 2591    | 244    | 0.084   | 0.072   |
| 3               | 10.290 | 2939479 | 325931 | 95.771  | 96.478  |
| 4               | 11.089 | 8162    | 695    | 0.266   | 0.206   |
| 5               | 11.412 | 4872    | 583    | 0.159   | 0.173   |
| 6               | 12.655 | 7568    | 850    | 0.247   | 0.252   |
| 总计              |        | 3069289 | 337829 | 100.000 | 100.000 |

Compound 17a.  $^1\text{H}$  NMR,  $\text{CDCl}_3$ , 500 MHz

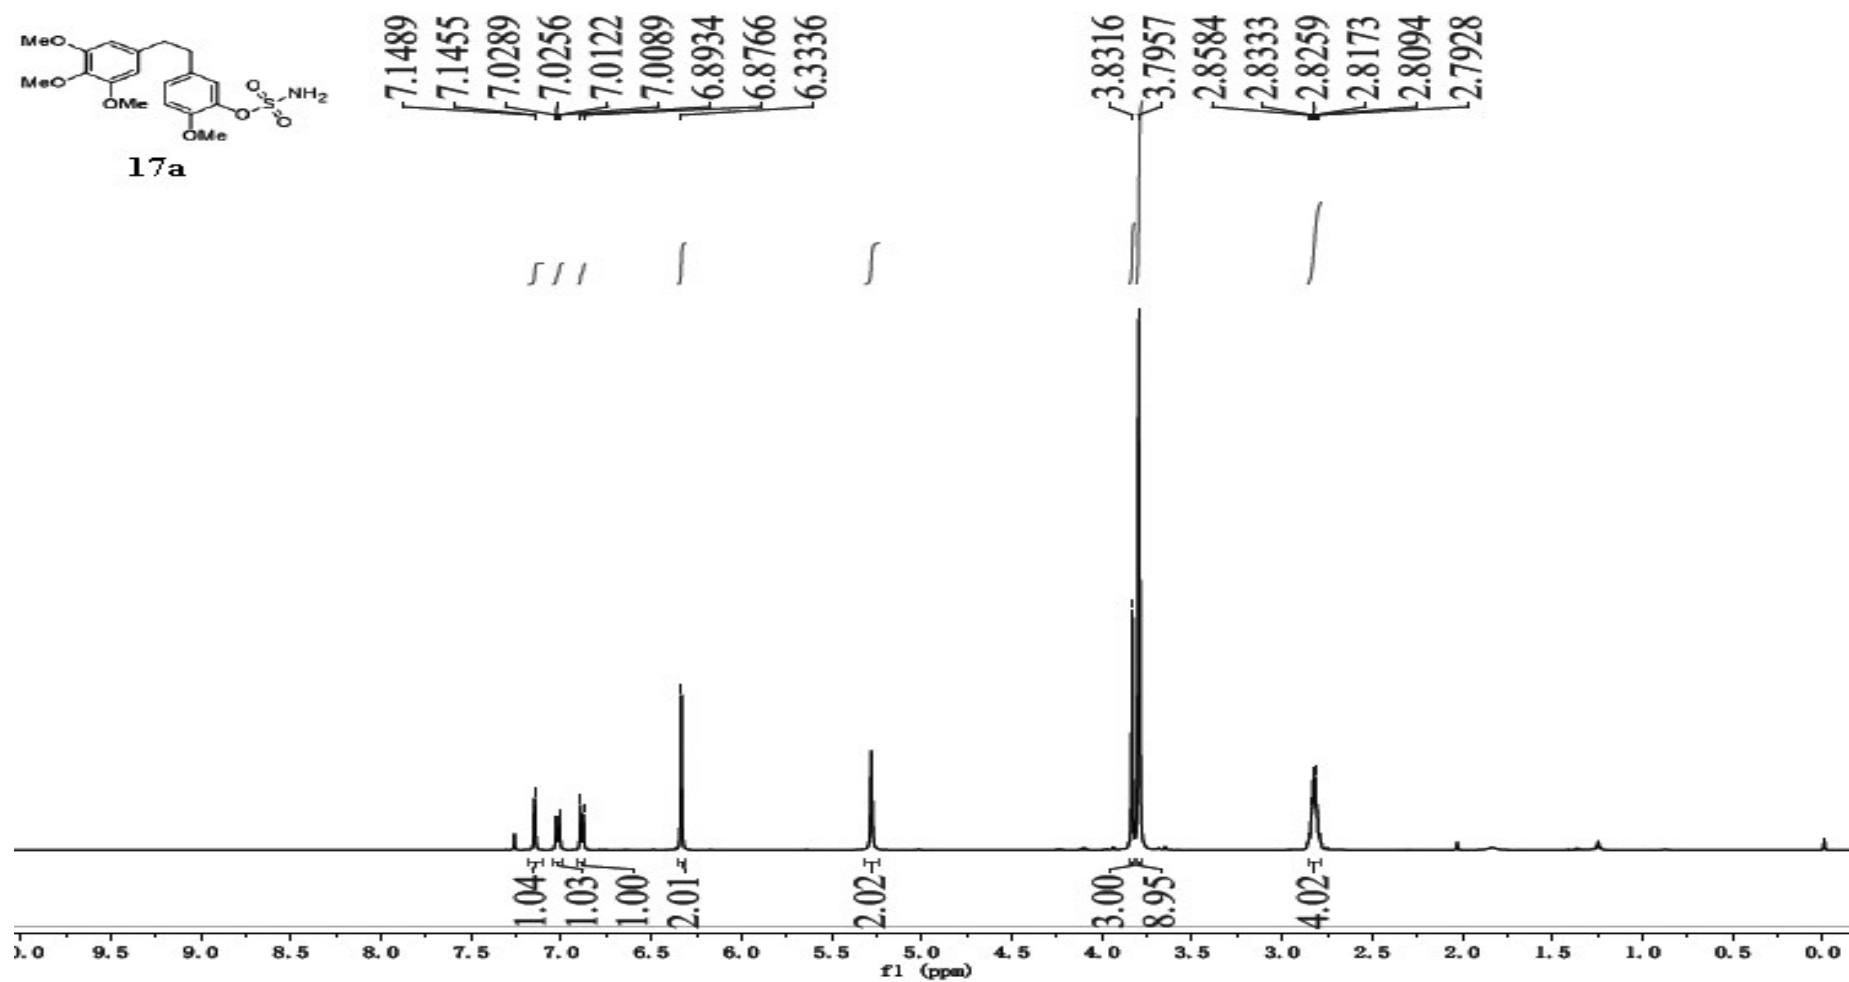

Compound 17a.  $^{13}\text{C}$  NMR,  $\text{CDCl}_3$ , 125 MHz



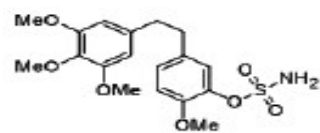

17a

153.08  
149.78  
138.91  
137.14  
136.29  
134.99  
128.03  
124.10  
-113.07  
-105.68  
60.92  
56.35  
56.18  
38.13  
36.85

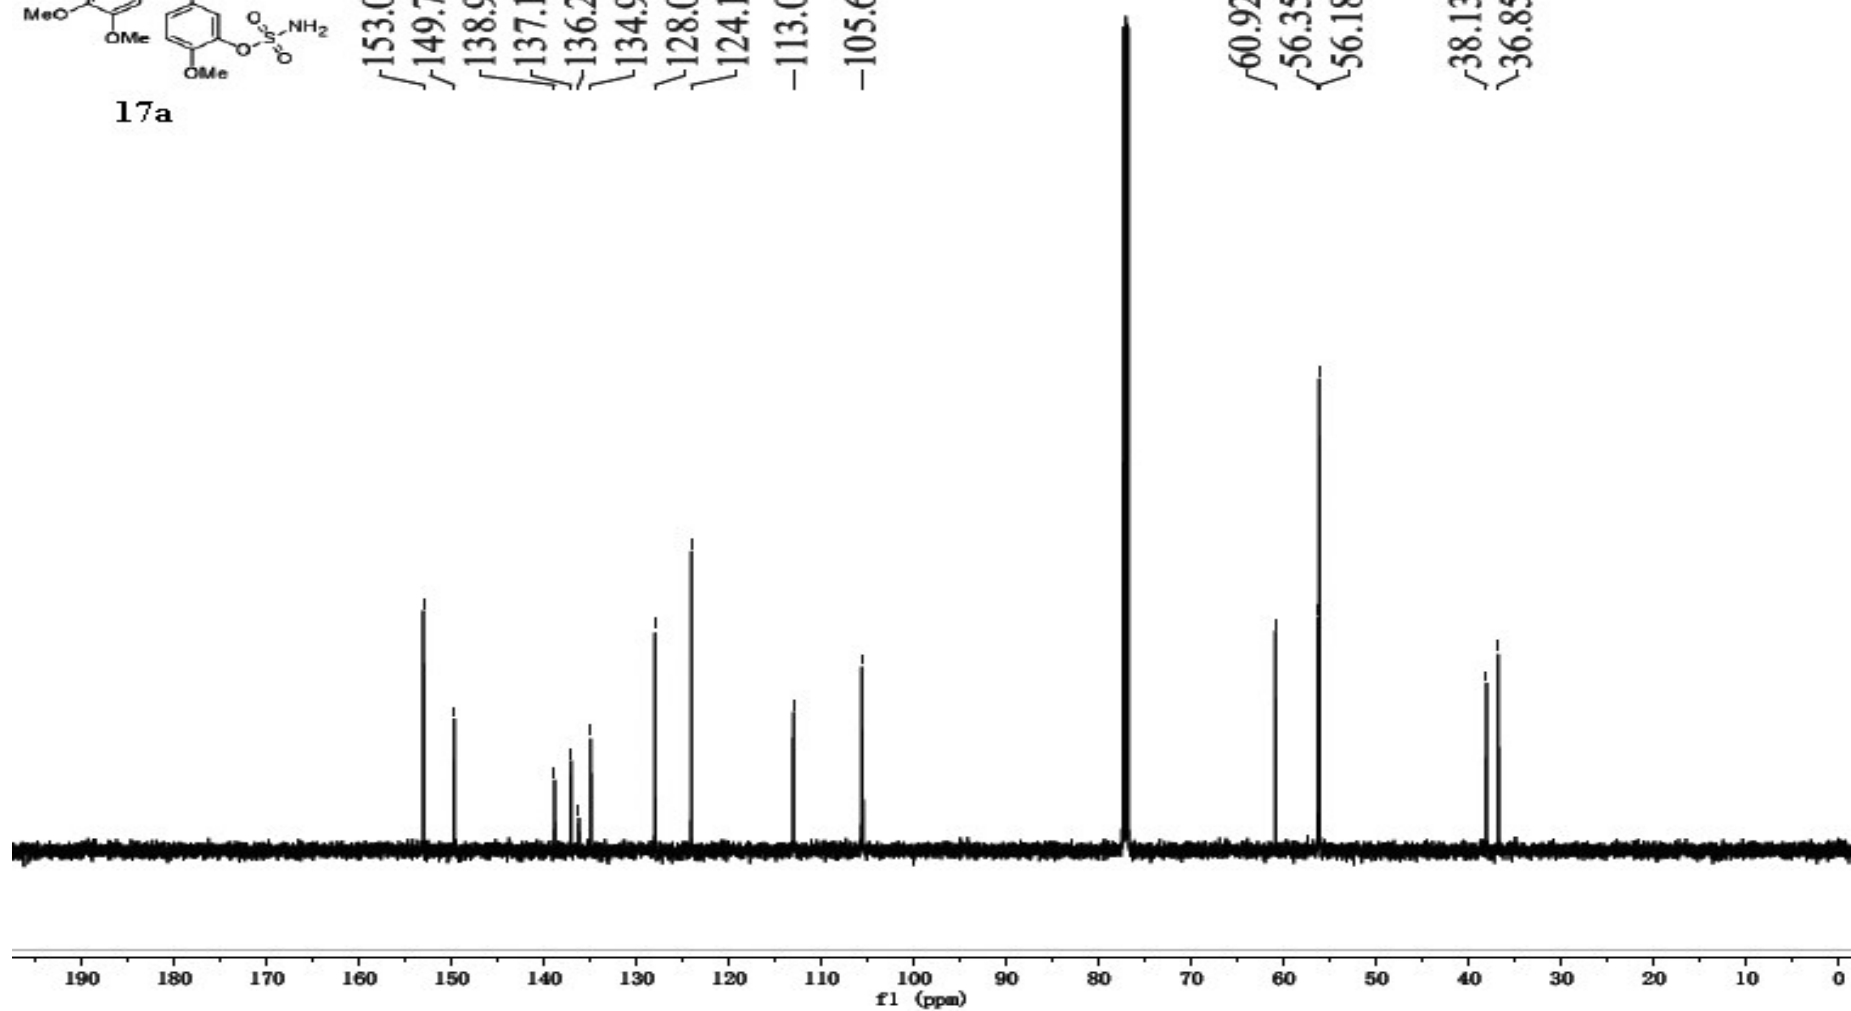

**HR-MS Spectrum of Compound 17a**

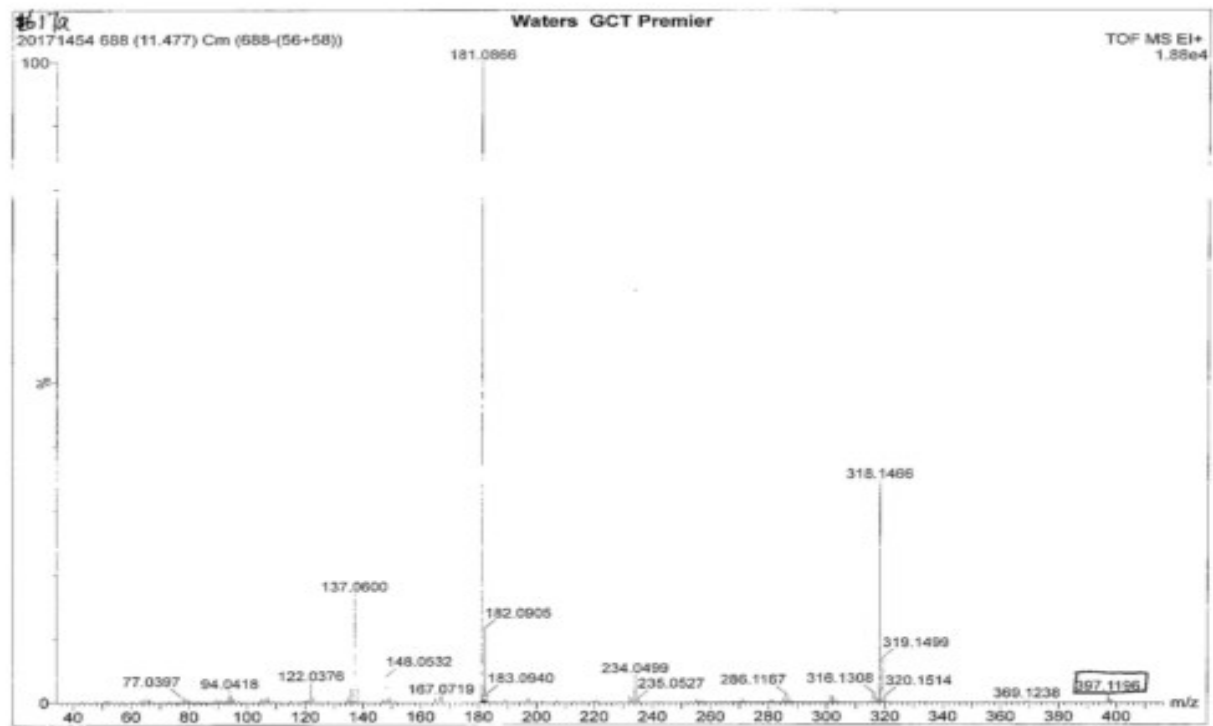

# HPLC Spectrum of Compound 17a

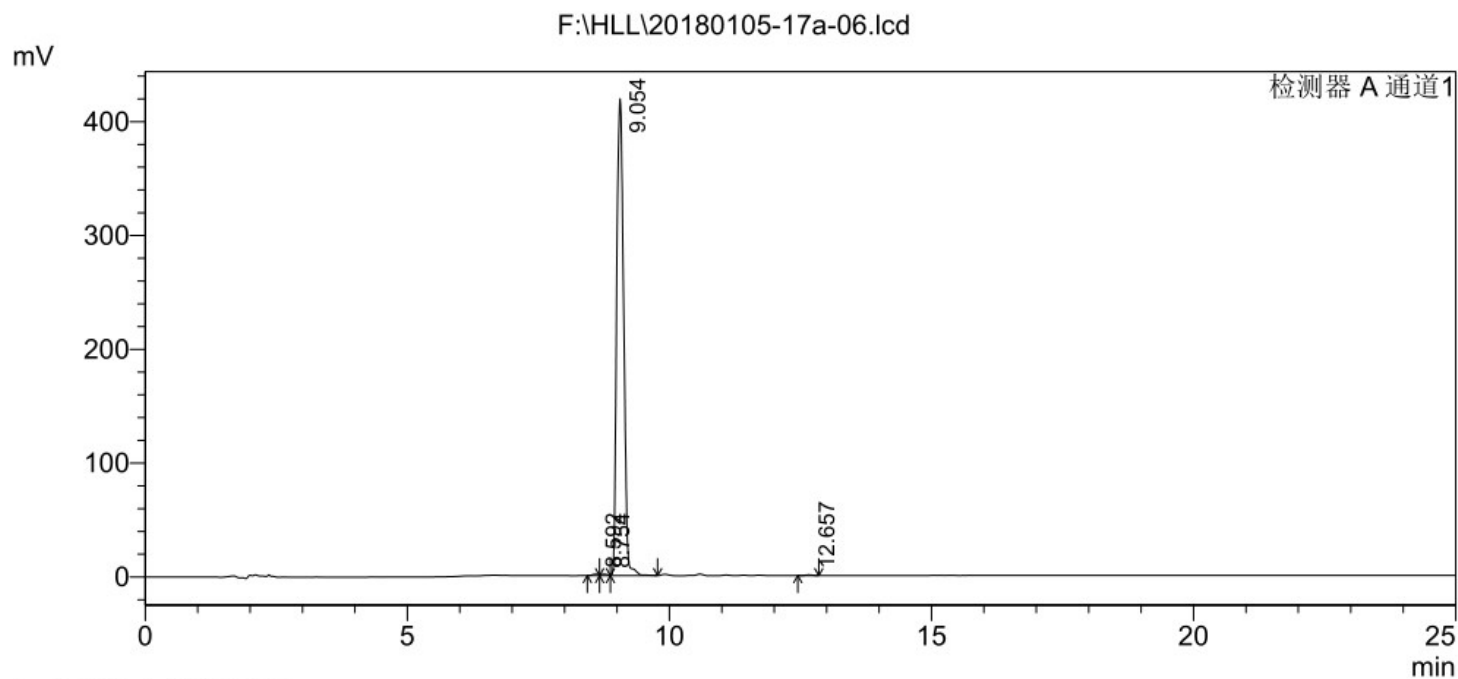

峰表

检测器 A Ch1 276nm

| 峰# | 保留时间   | 面积      | 高度     | 面积 %    | 高度 %    |
|----|--------|---------|--------|---------|---------|
| 1  | 8.592  | 10131   | 1168   | 0.260   | 0.277   |
| 2  | 8.754  | 10999   | 1158   | 0.283   | 0.274   |
| 3  | 9.054  | 3862292 | 419207 | 99.301  | 99.301  |
| 4  | 12.657 | 6054    | 627    | 0.156   | 0.148   |
| 总计 |        | 3889476 | 422160 | 100.000 | 100.000 |

Compound 17b.  $^1\text{H}$  NMR, DMSO, 500 MHz

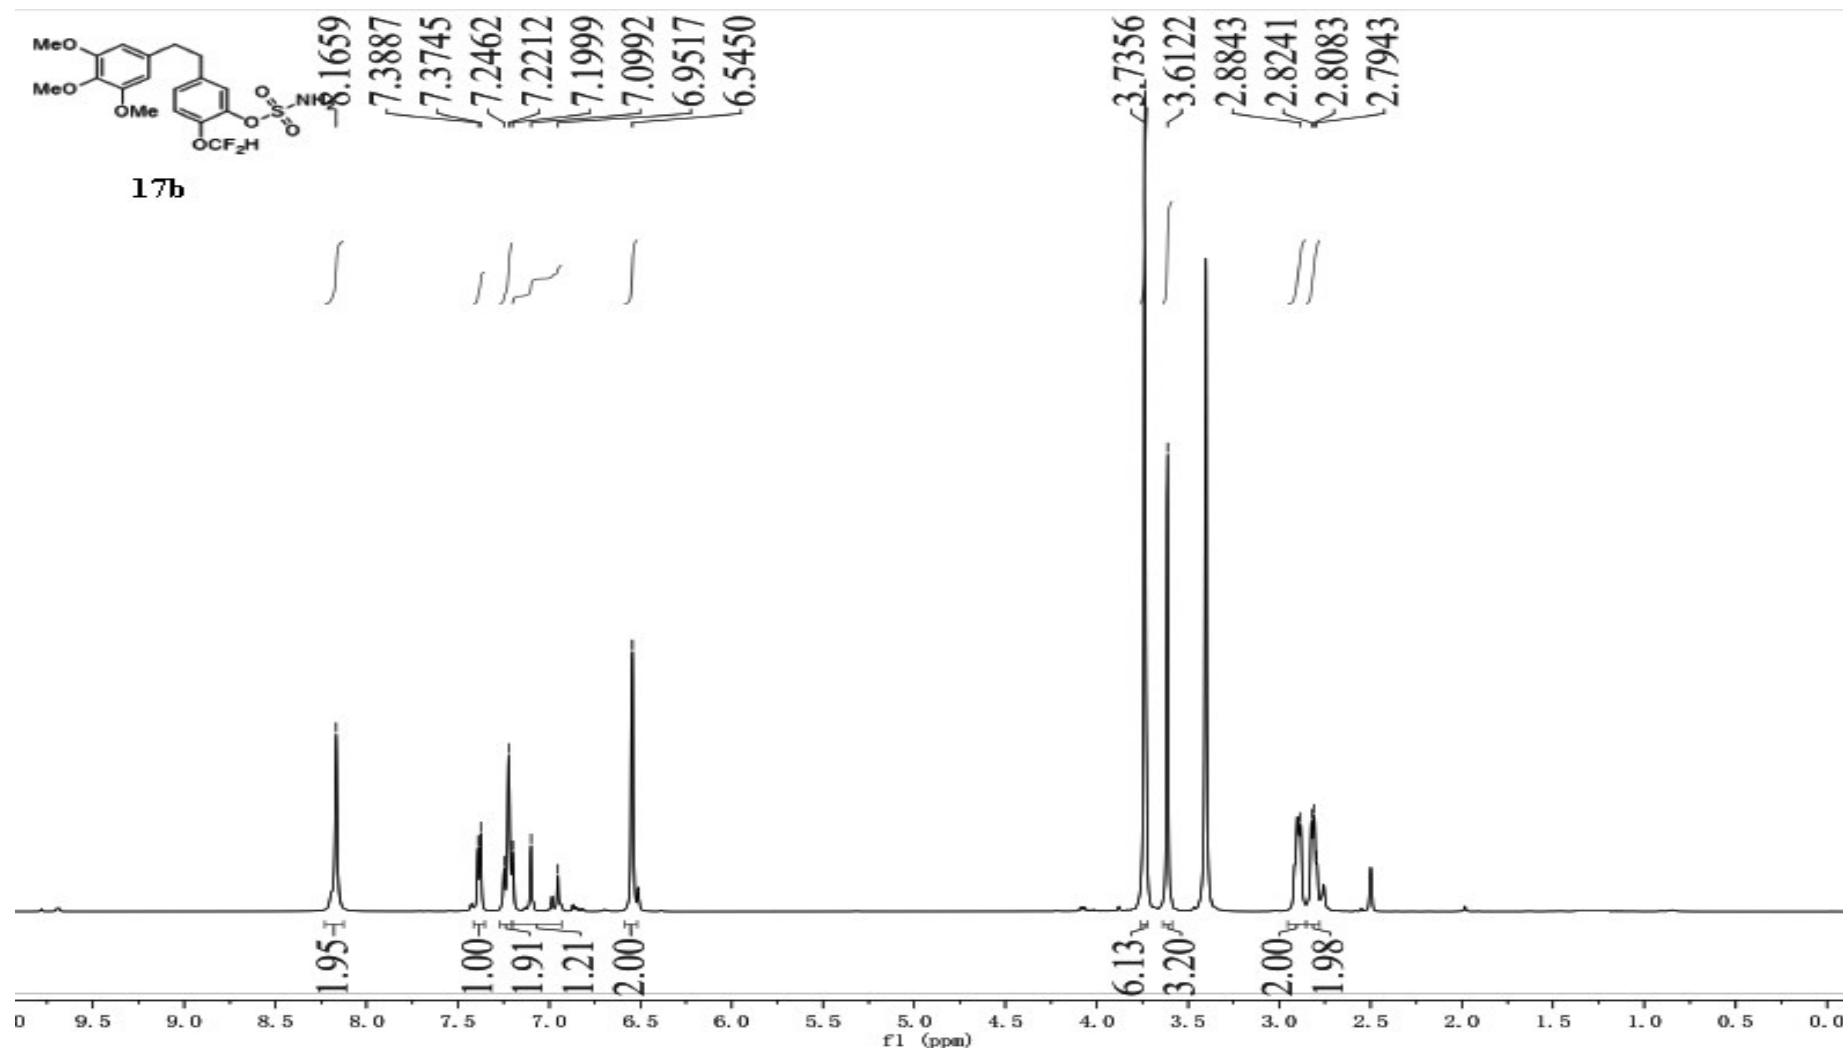

Compound 17b.  $^{13}\text{C}$  NMR, DMSO, 125 MHz

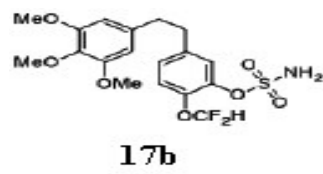

152.74  
 142.95  
 141.55  
 138.97  
 136.87  
 135.76  
 125.99  
 123.65  
 120.68  
 118.57  
 116.51  
 114.46  
 105.73

~59.98  
 ~55.79

37.22  
 36.45

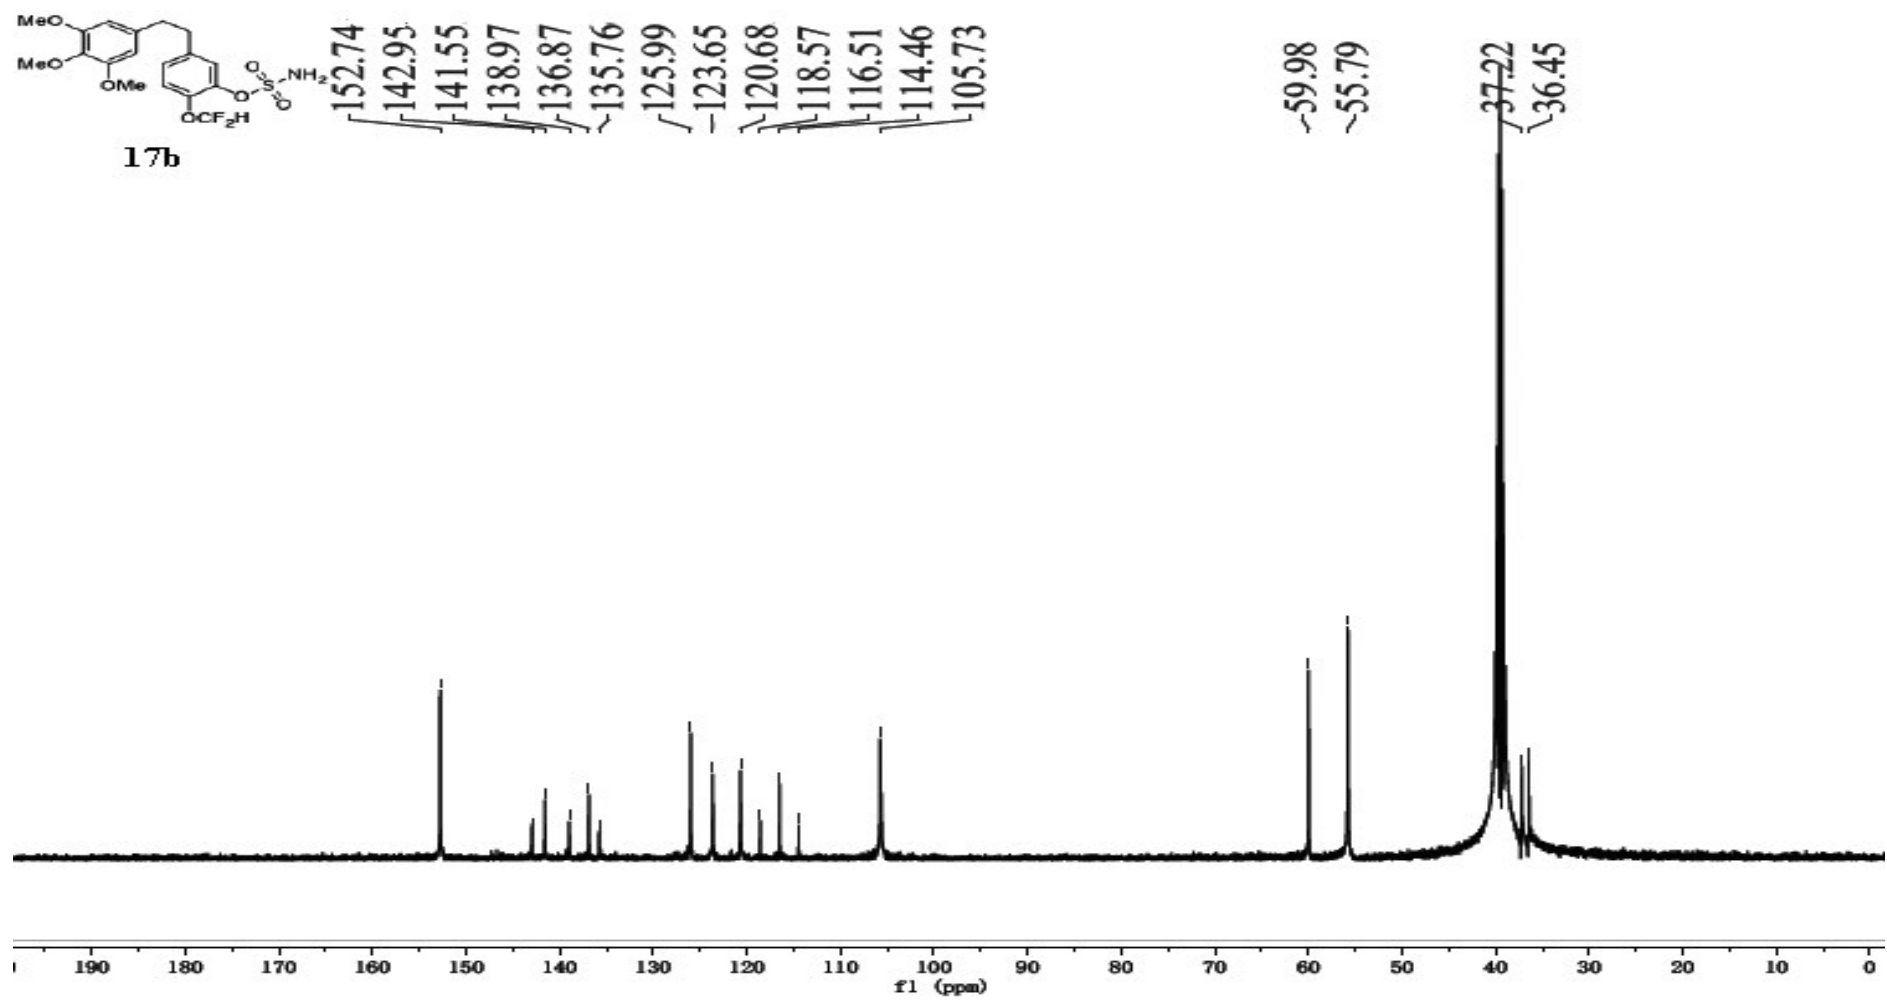

**HR-MS Spectrum of Compound 17b**

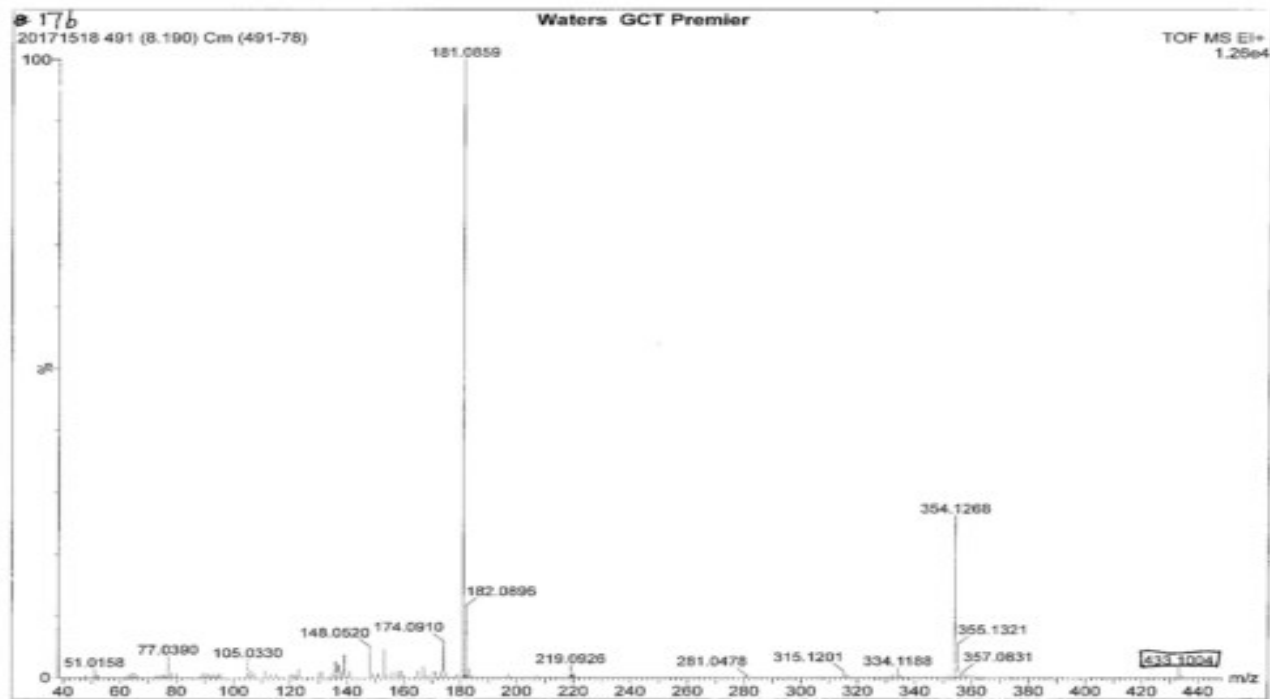



# HPLC Spectrum of Compound 17b

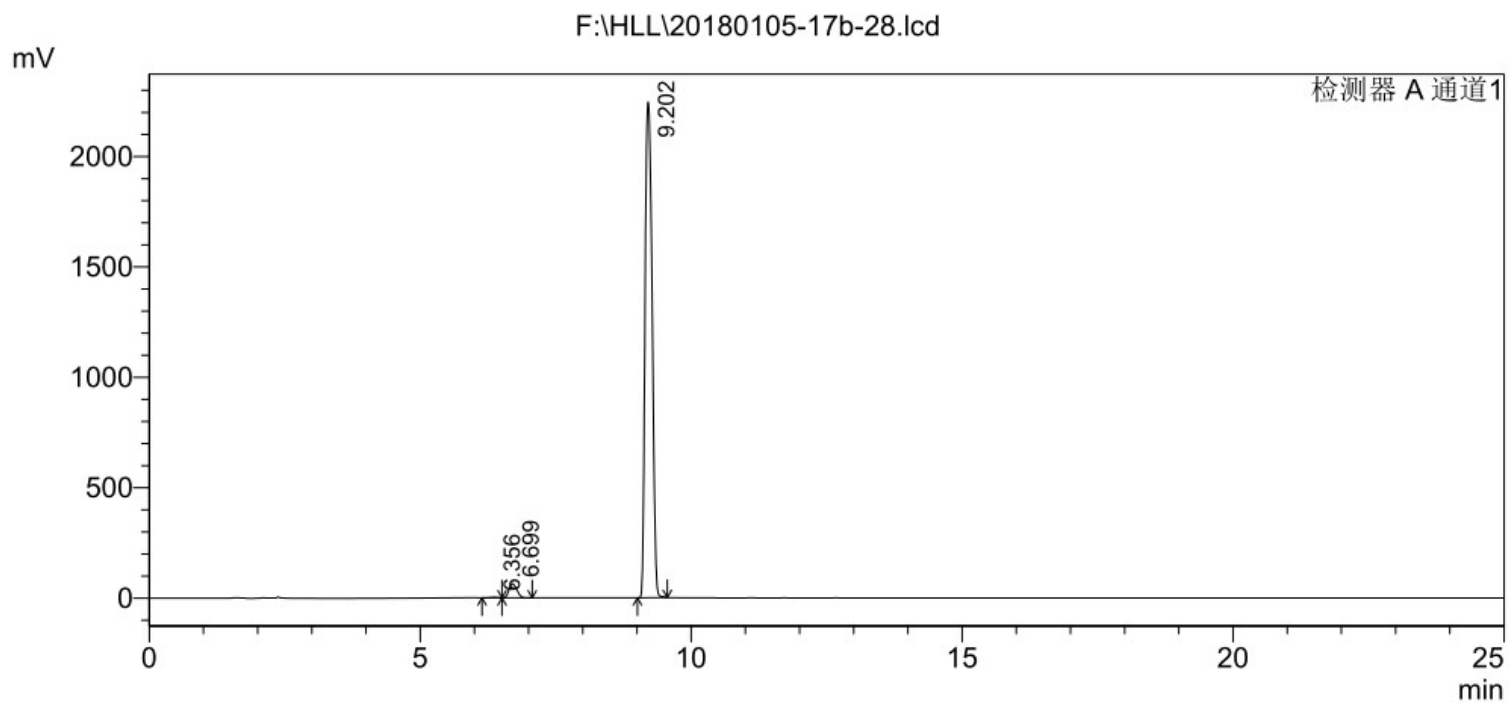

1 检测器 A 通道1/276nm

峰表

| 峰# | 保留时间  | 面积       | 高度      | 面积 %    | 高度 %    |
|----|-------|----------|---------|---------|---------|
| 1  | 6.356 | 28395    | 2610    | 0.135   | 0.113   |
| 2  | 6.699 | 652399   | 64095   | 3.105   | 2.772   |
| 3  | 9.202 | 20328934 | 2245772 | 96.760  | 97.115  |
| 总计 |       | 21009728 | 2312477 | 100.000 | 100.000 |

**Compound 17c.**  $^1\text{H}$  NMR, DMSO, 500 MHz

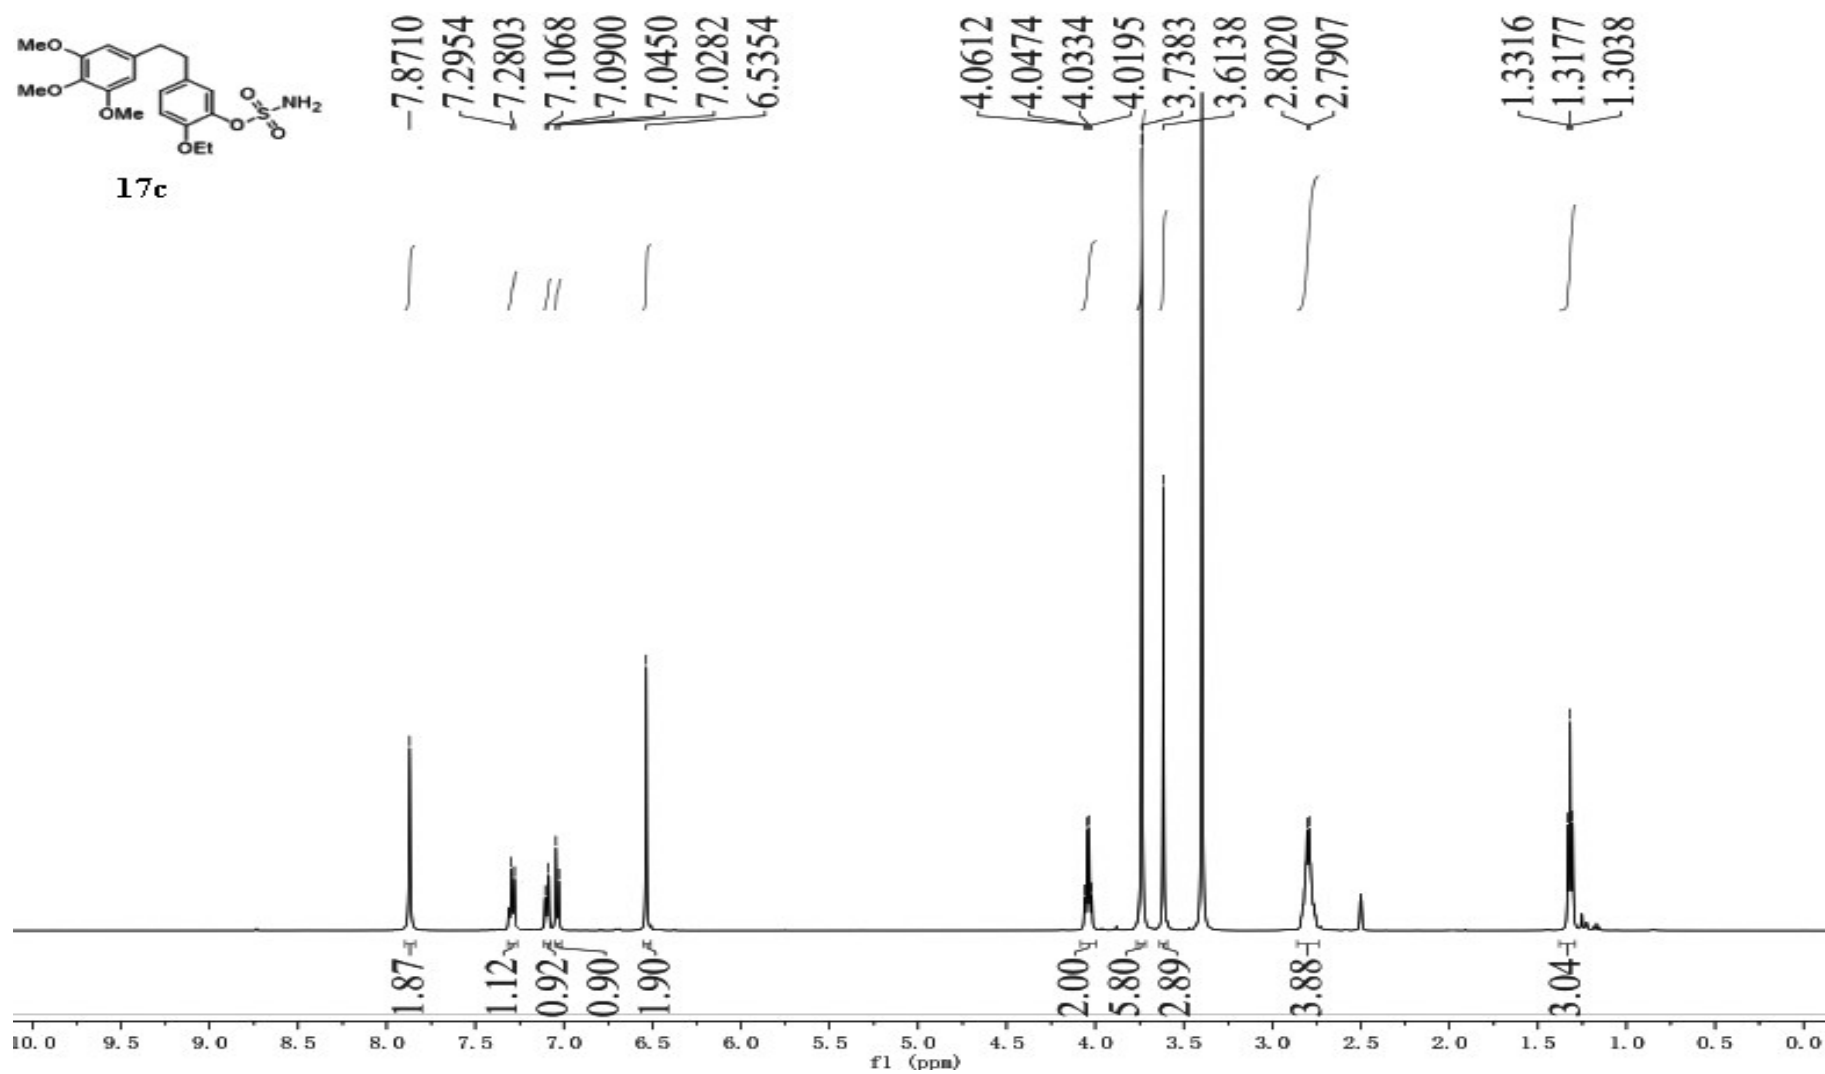

**Compound 17c.** <sup>13</sup>C NMR, DMSO, 125 MHz

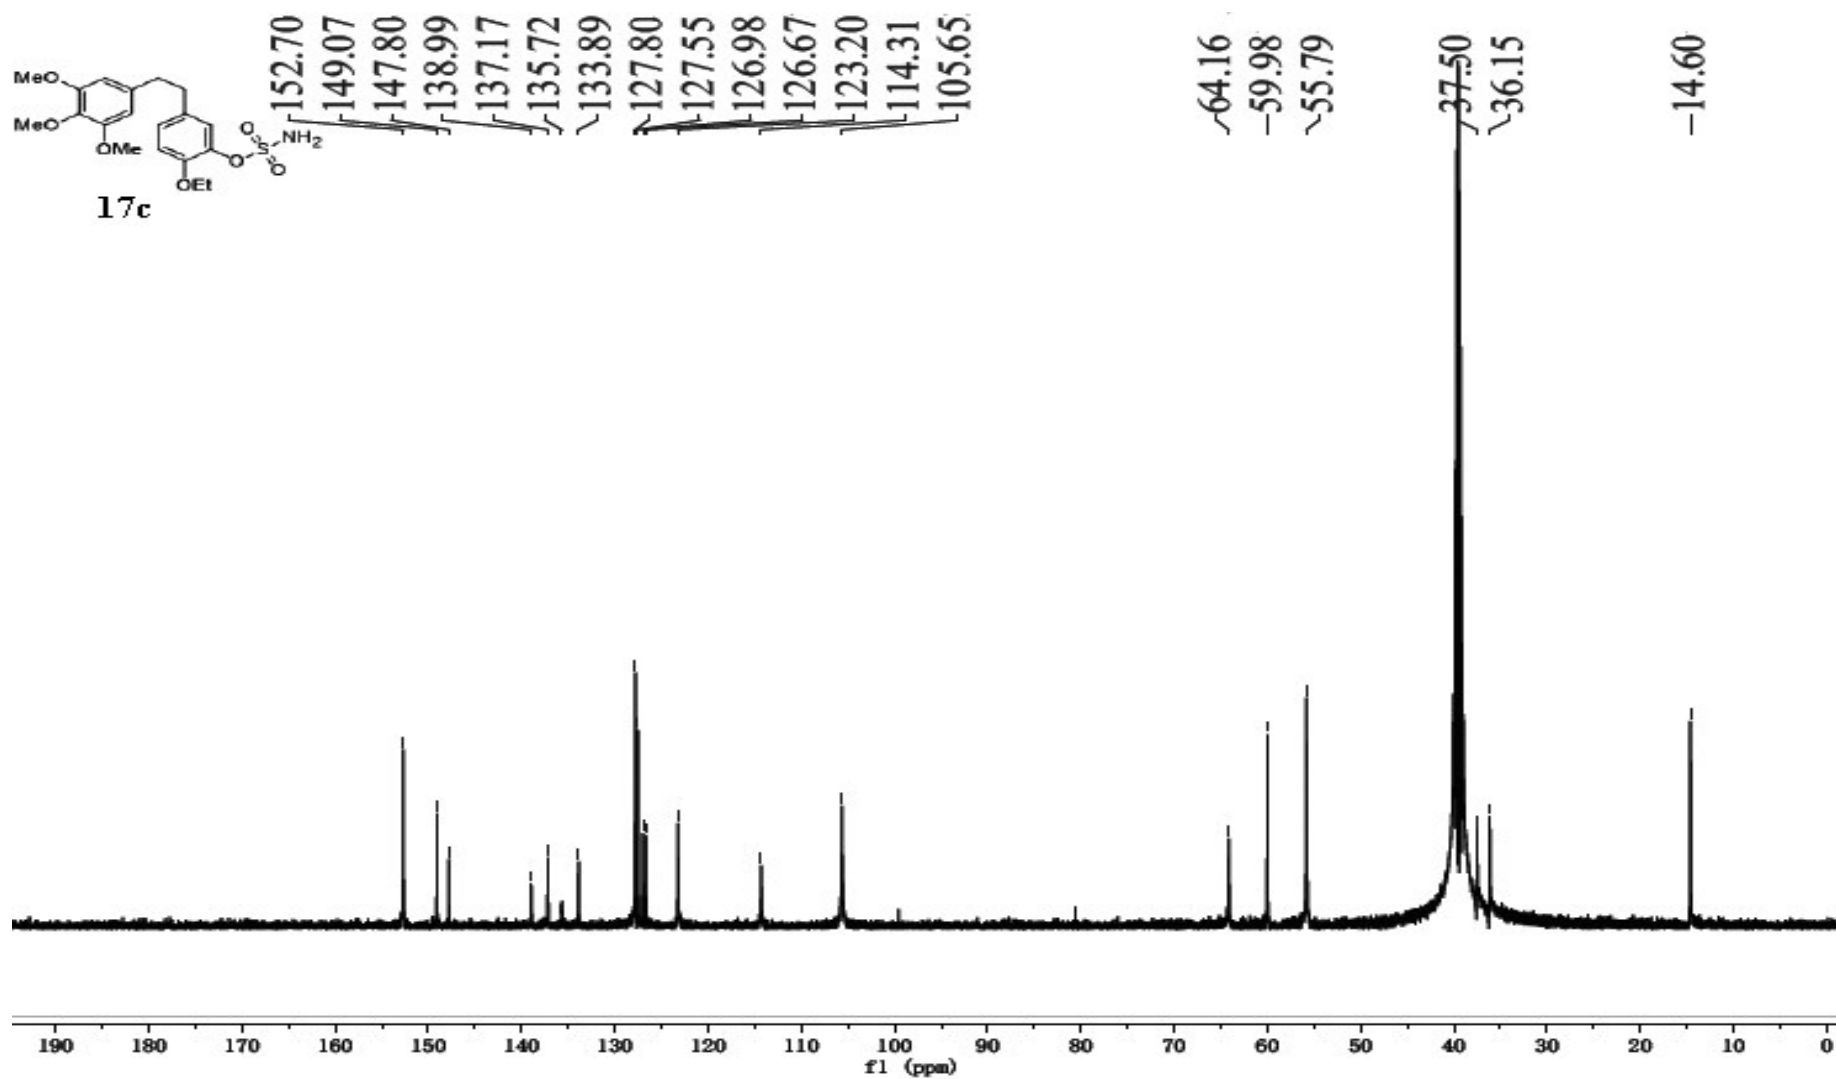

**HR-MS Spectrum of Compound 17c**

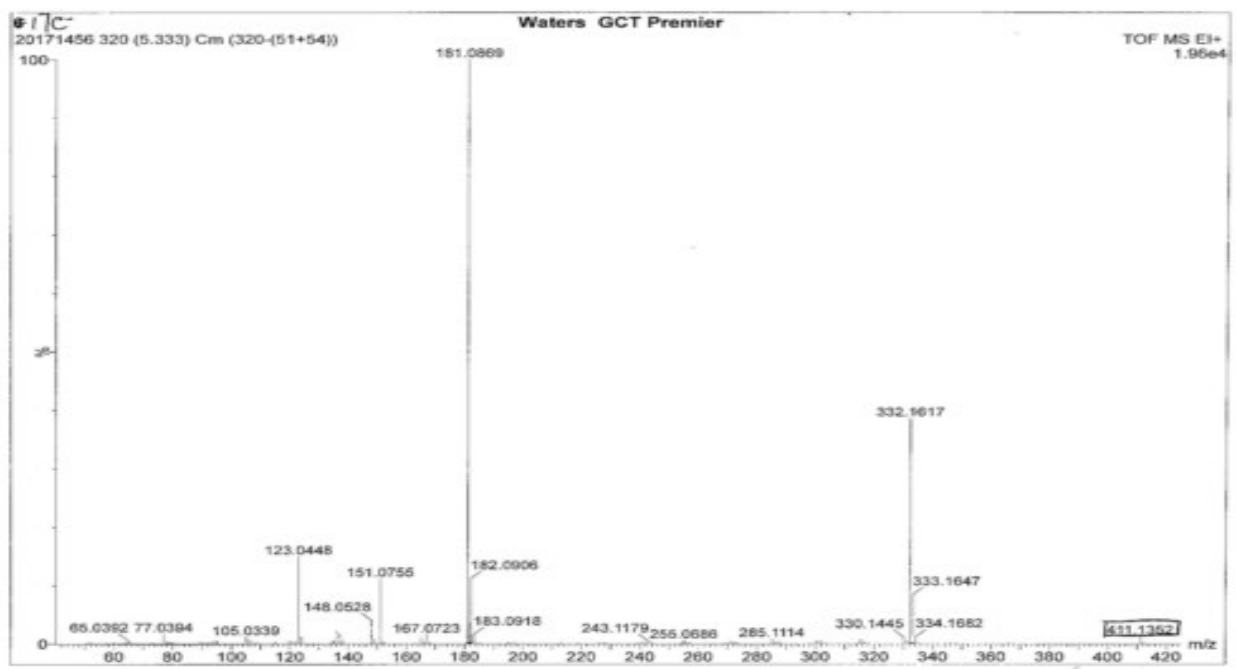

**HPLC Spectrum of Compound 17c**

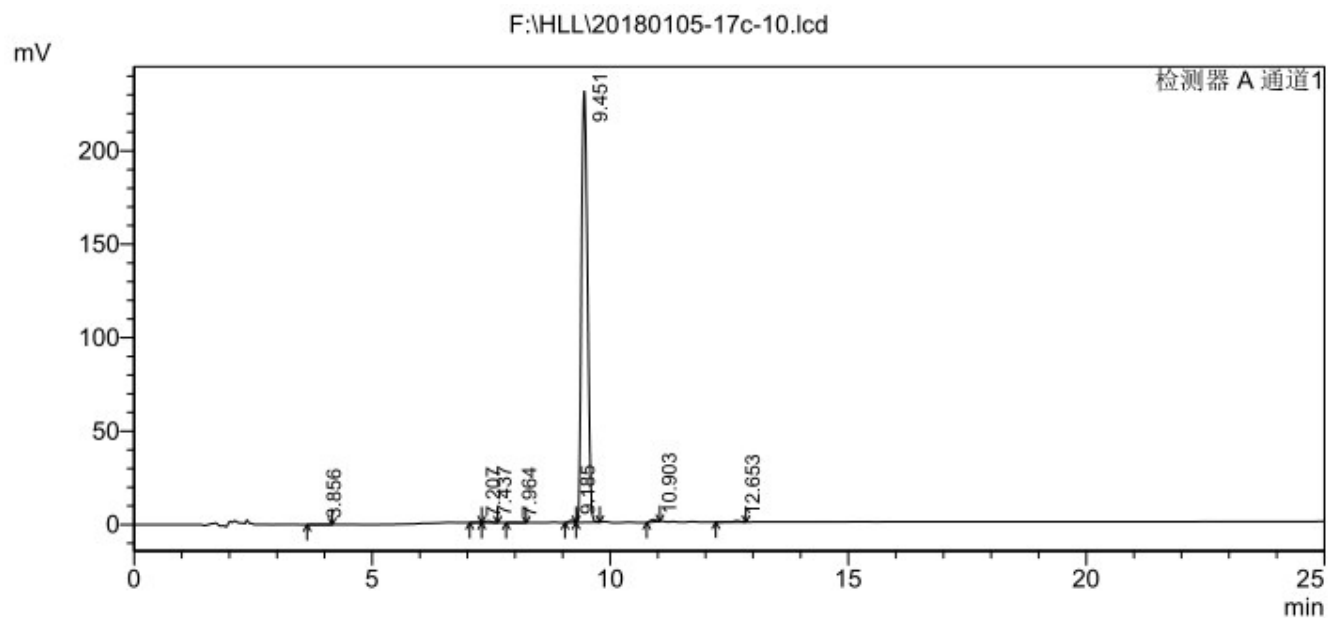

1 检测器 A 通道1/276nm

峰表

| 峰# | 保留时间   | 面积      | 高度     | 面积 %    | 高度 %    |
|----|--------|---------|--------|---------|---------|
| 1  | 3.856  | 1930    | 140    | 0.093   | 0.060   |
| 2  | 7.207  | 1435    | 161    | 0.069   | 0.069   |
| 3  | 7.437  | 7933    | 843    | 0.383   | 0.358   |
| 4  | 7.964  | 1820    | 163    | 0.088   | 0.069   |
| 5  | 9.185  | 8642    | 1067   | 0.417   | 0.454   |
| 6  | 9.451  | 2032398 | 230837 | 98.134  | 98.196  |
| 7  | 10.903 | 10280   | 1205   | 0.496   | 0.512   |
| 8  | 12.653 | 6603    | 662    | 0.319   | 0.282   |
| 总计 |        | 2071042 | 235078 | 100.000 | 100.000 |

Compound 17d.  $^1\text{H}$  NMR,  $\text{CDCl}_3$ , 500 MHz



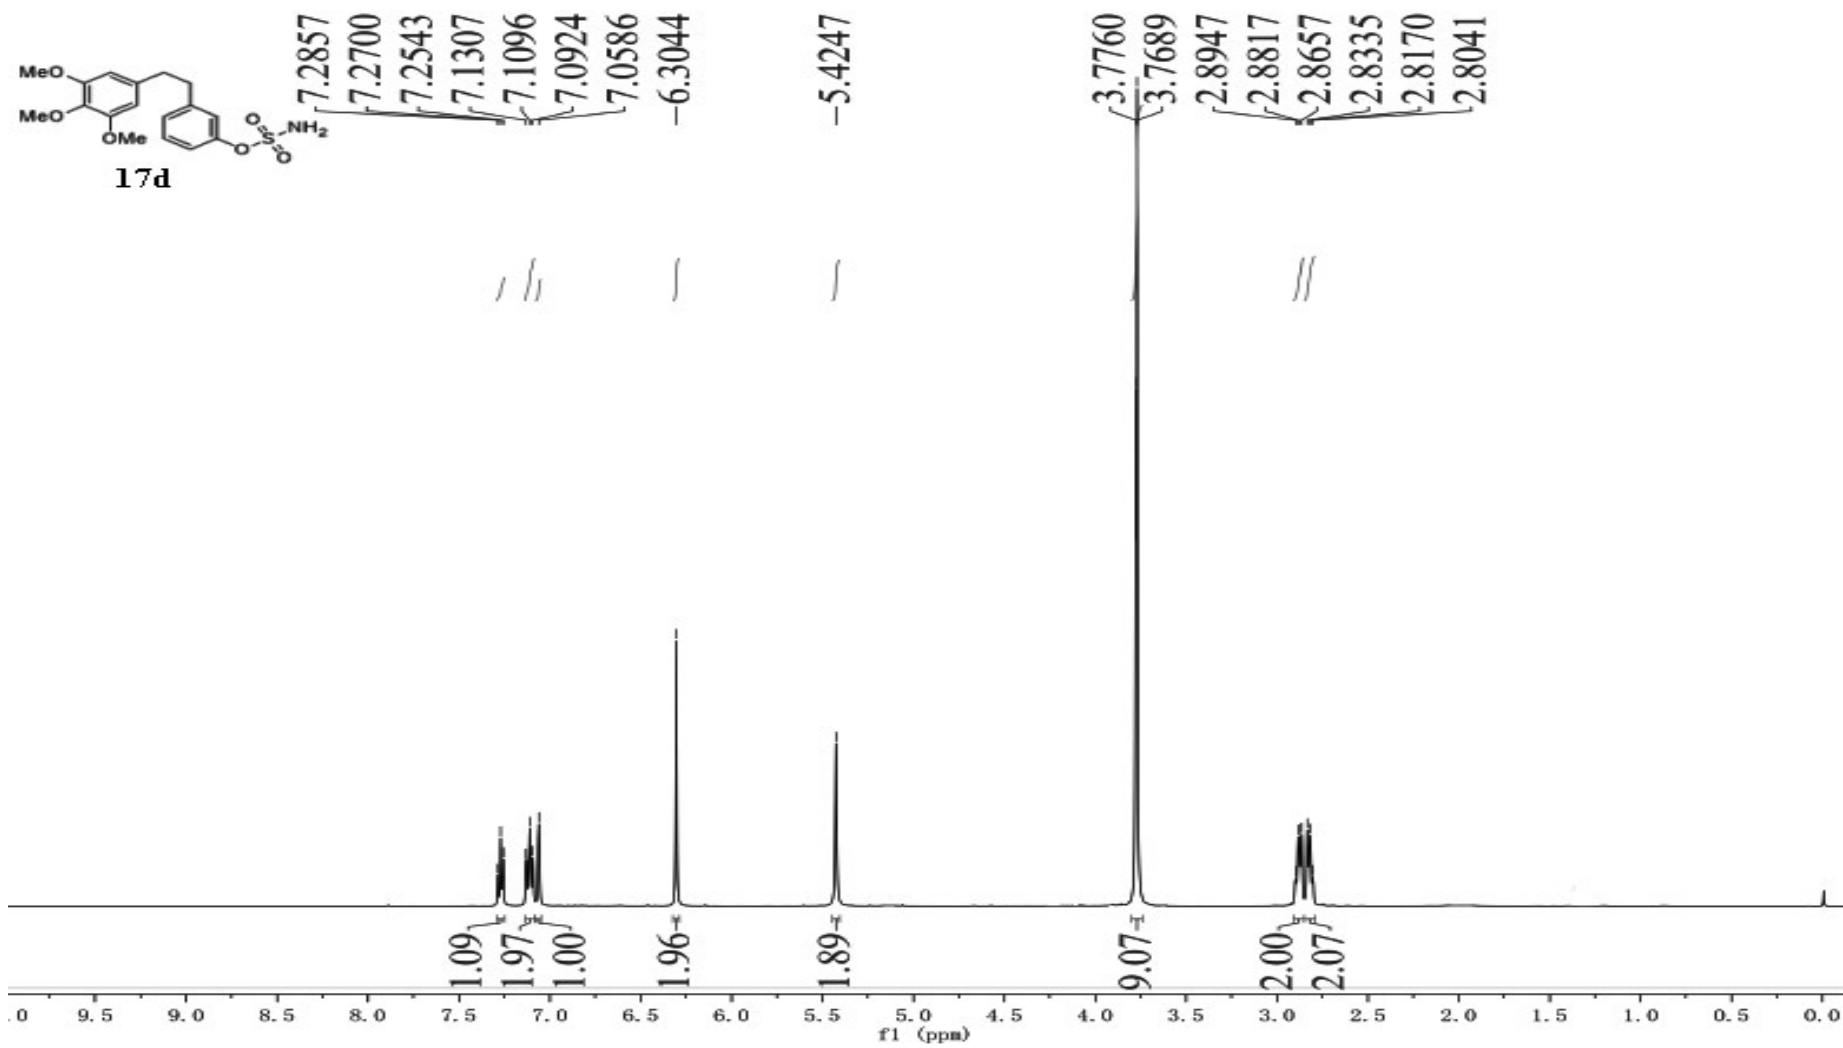

**Compound 17d.** <sup>13</sup>C NMR, CDCl<sub>3</sub>, 125 MHz

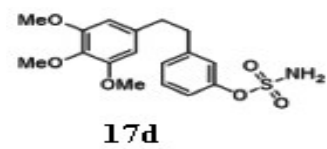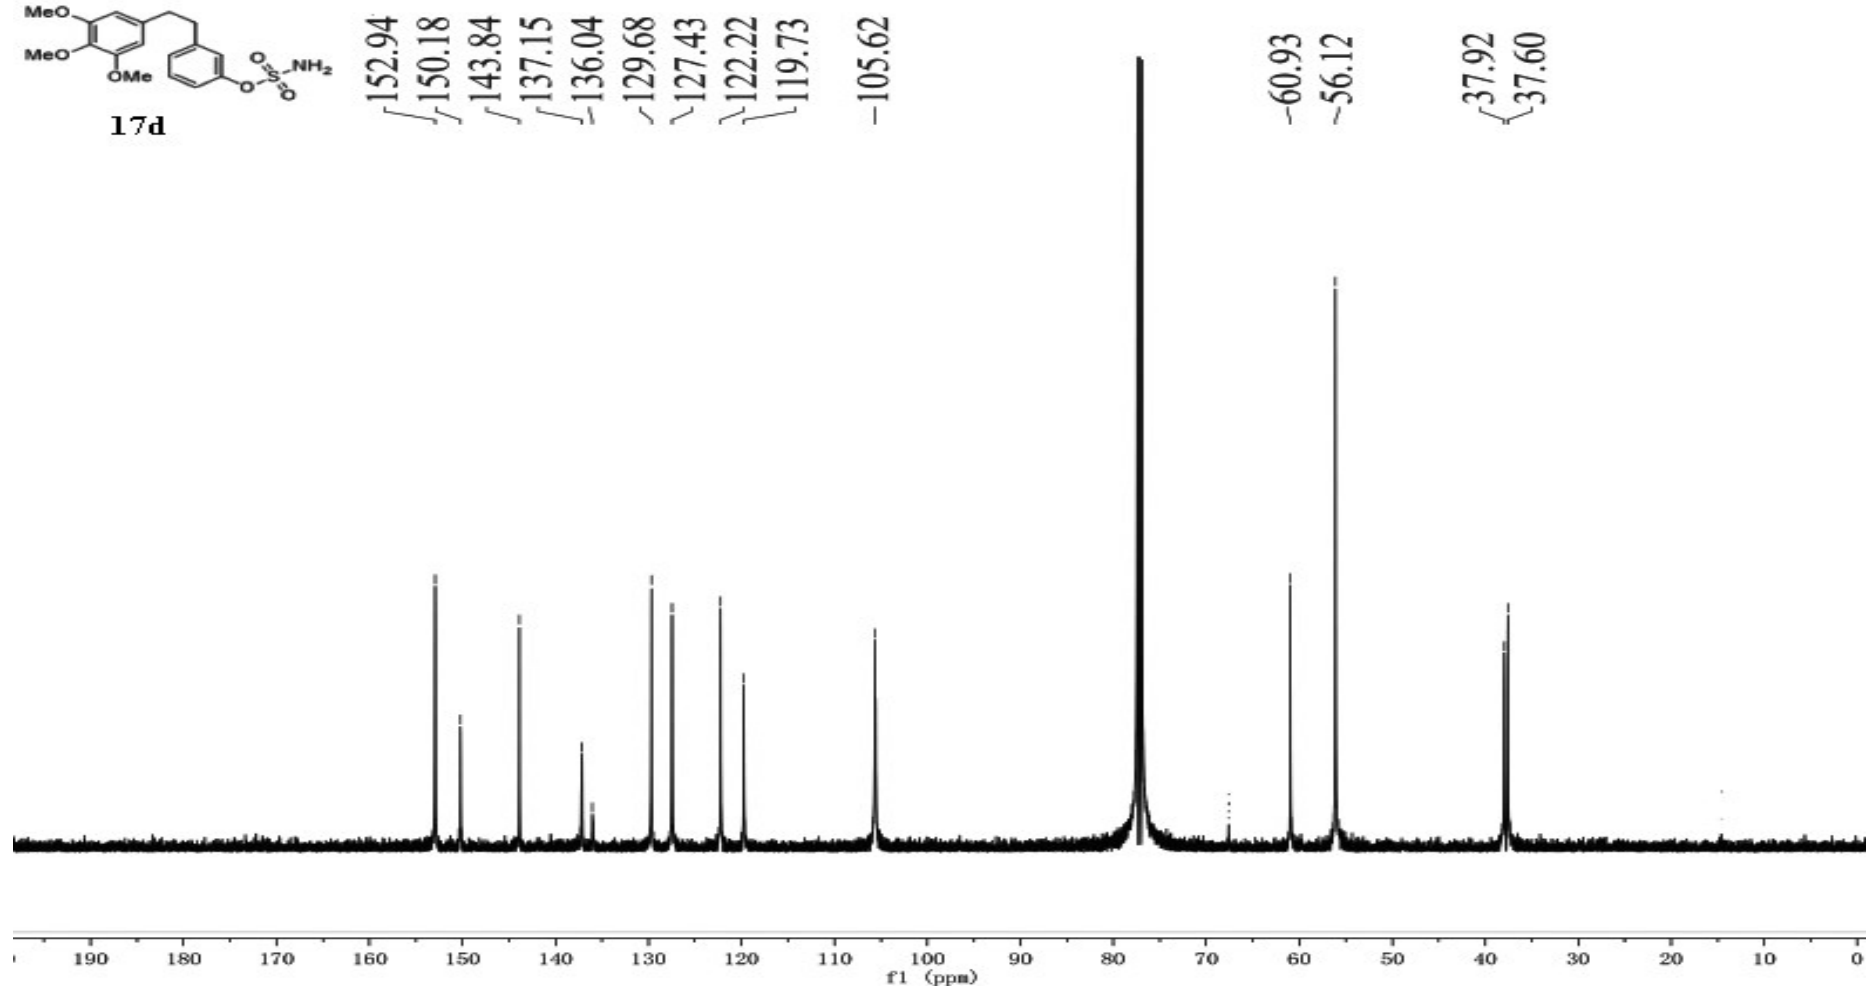

**HR-MS Spectrum of Compound 17d**

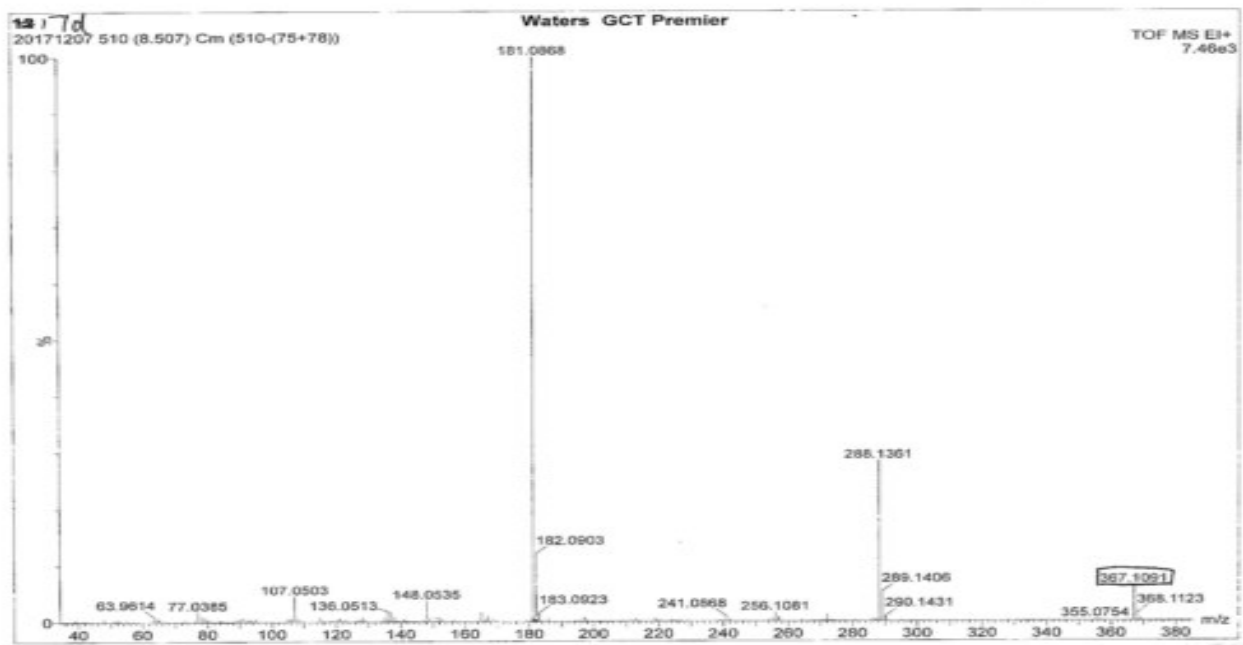

**HPLC Spectrum of Compound 17d**

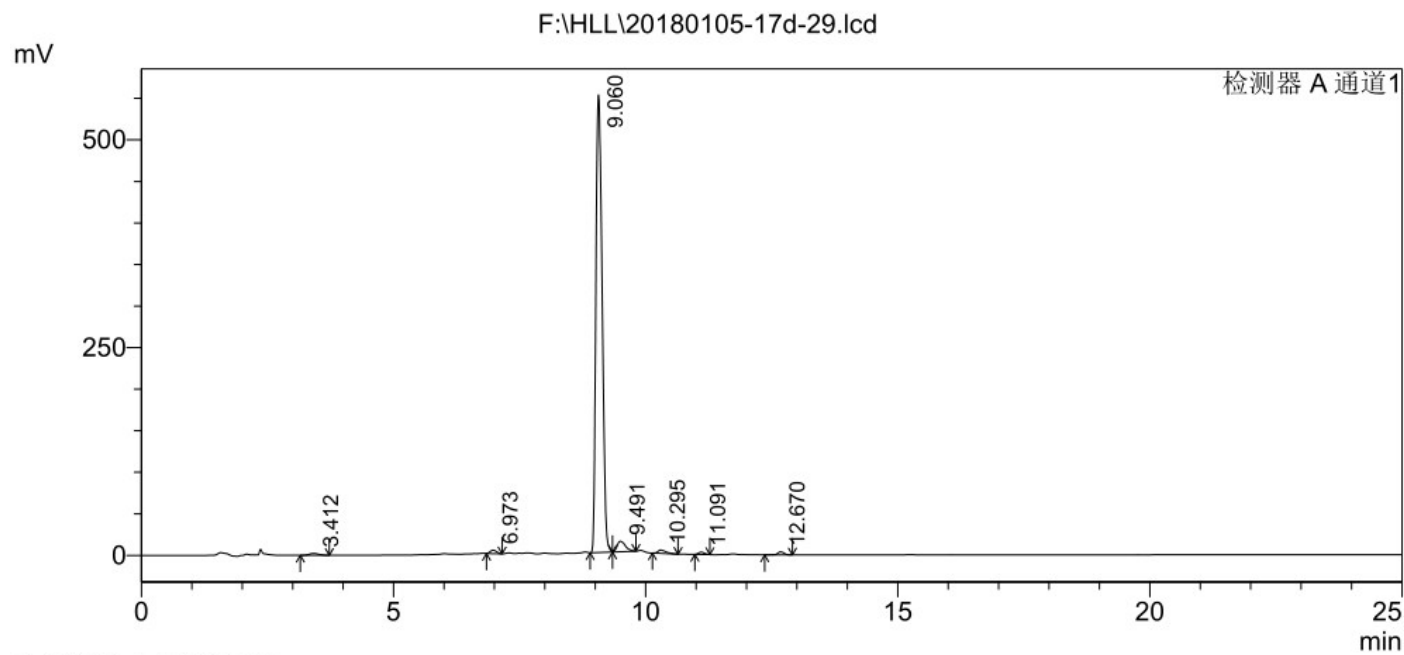

1 检测器 A 通道1/276nm

峰表

检测器 A Ch1 276nm

| 峰# | 保留时间   | 面积      | 高度     | 面积 %    | 高度 %    |
|----|--------|---------|--------|---------|---------|
| 1  | 3.412  | 29600   | 2268   | 0.587   | 0.391   |
| 2  | 6.973  | 35950   | 4149   | 0.713   | 0.715   |
| 3  | 9.060  | 4728066 | 550993 | 93.794  | 94.945  |
| 4  | 9.491  | 148428  | 12651  | 2.944   | 2.180   |
| 5  | 10.295 | 45359   | 4046   | 0.900   | 0.697   |
| 6  | 11.091 | 21860   | 2653   | 0.434   | 0.457   |
| 7  | 12.670 | 31662   | 3567   | 0.628   | 0.615   |
| 总计 |        | 5040925 | 580326 | 100.000 | 100.000 |

Compound 18a. <sup>1</sup>H NMR, CDCl<sub>3</sub>, 500 MHz

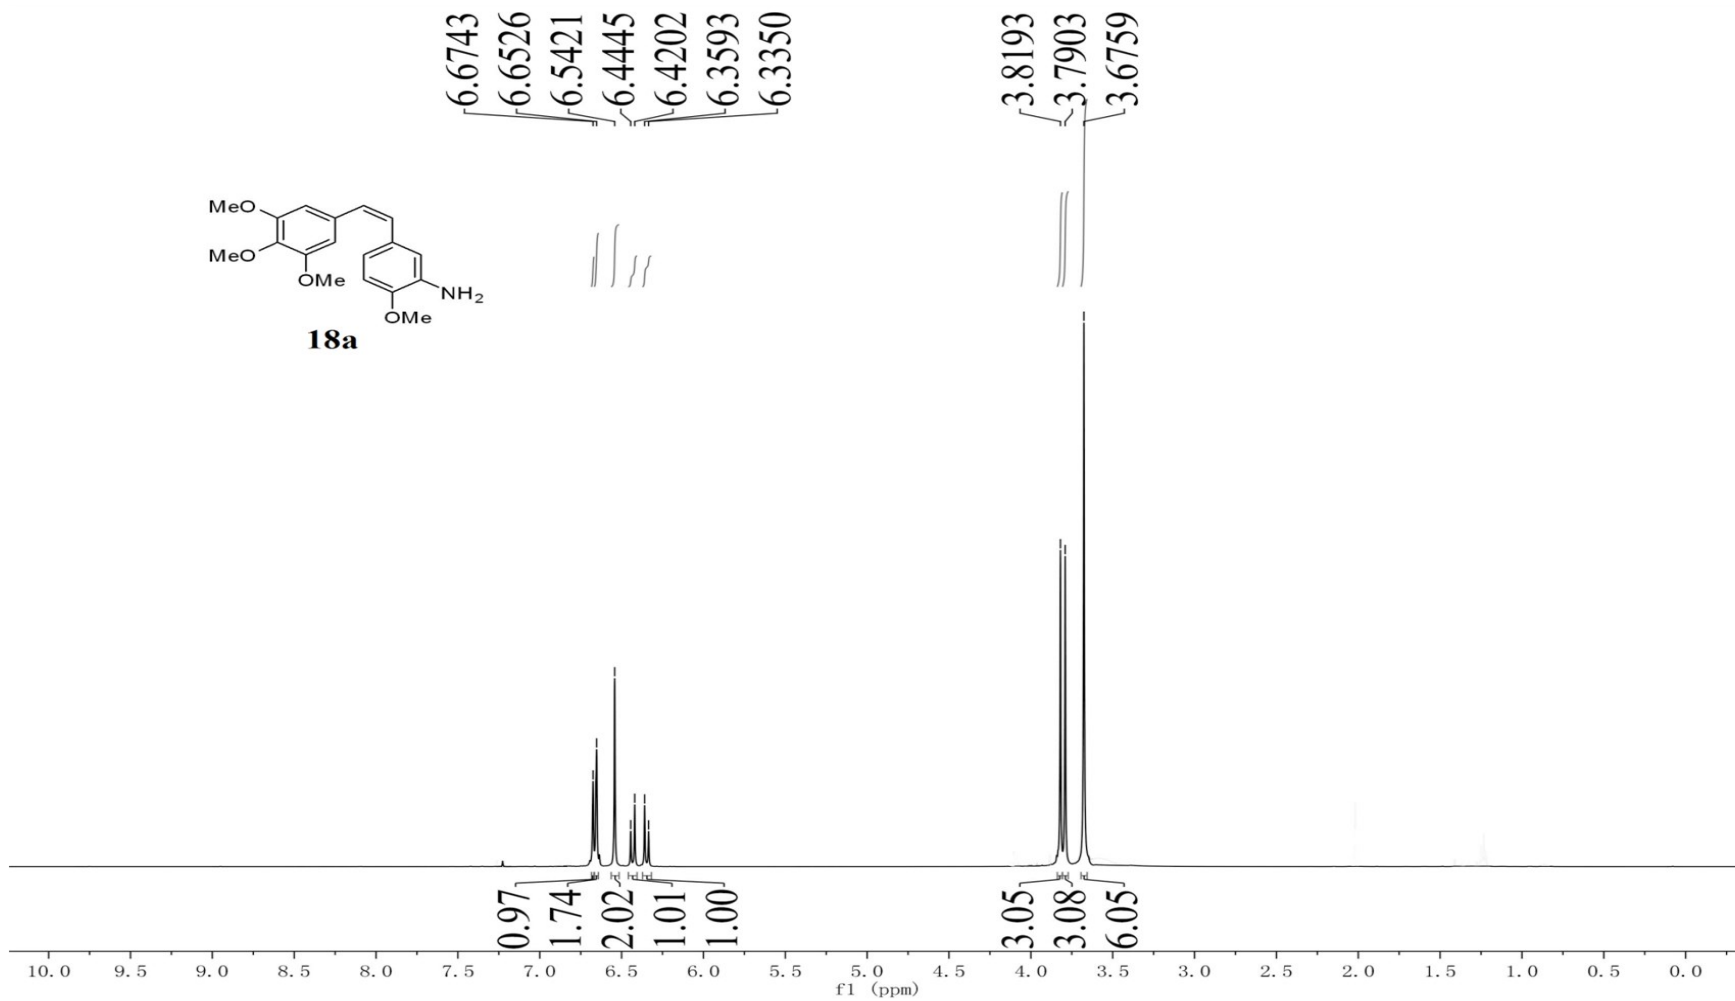

Compound 18a.  $^{13}\text{C}$  NMR,  $\text{CDCl}_3$ , 125 MHz

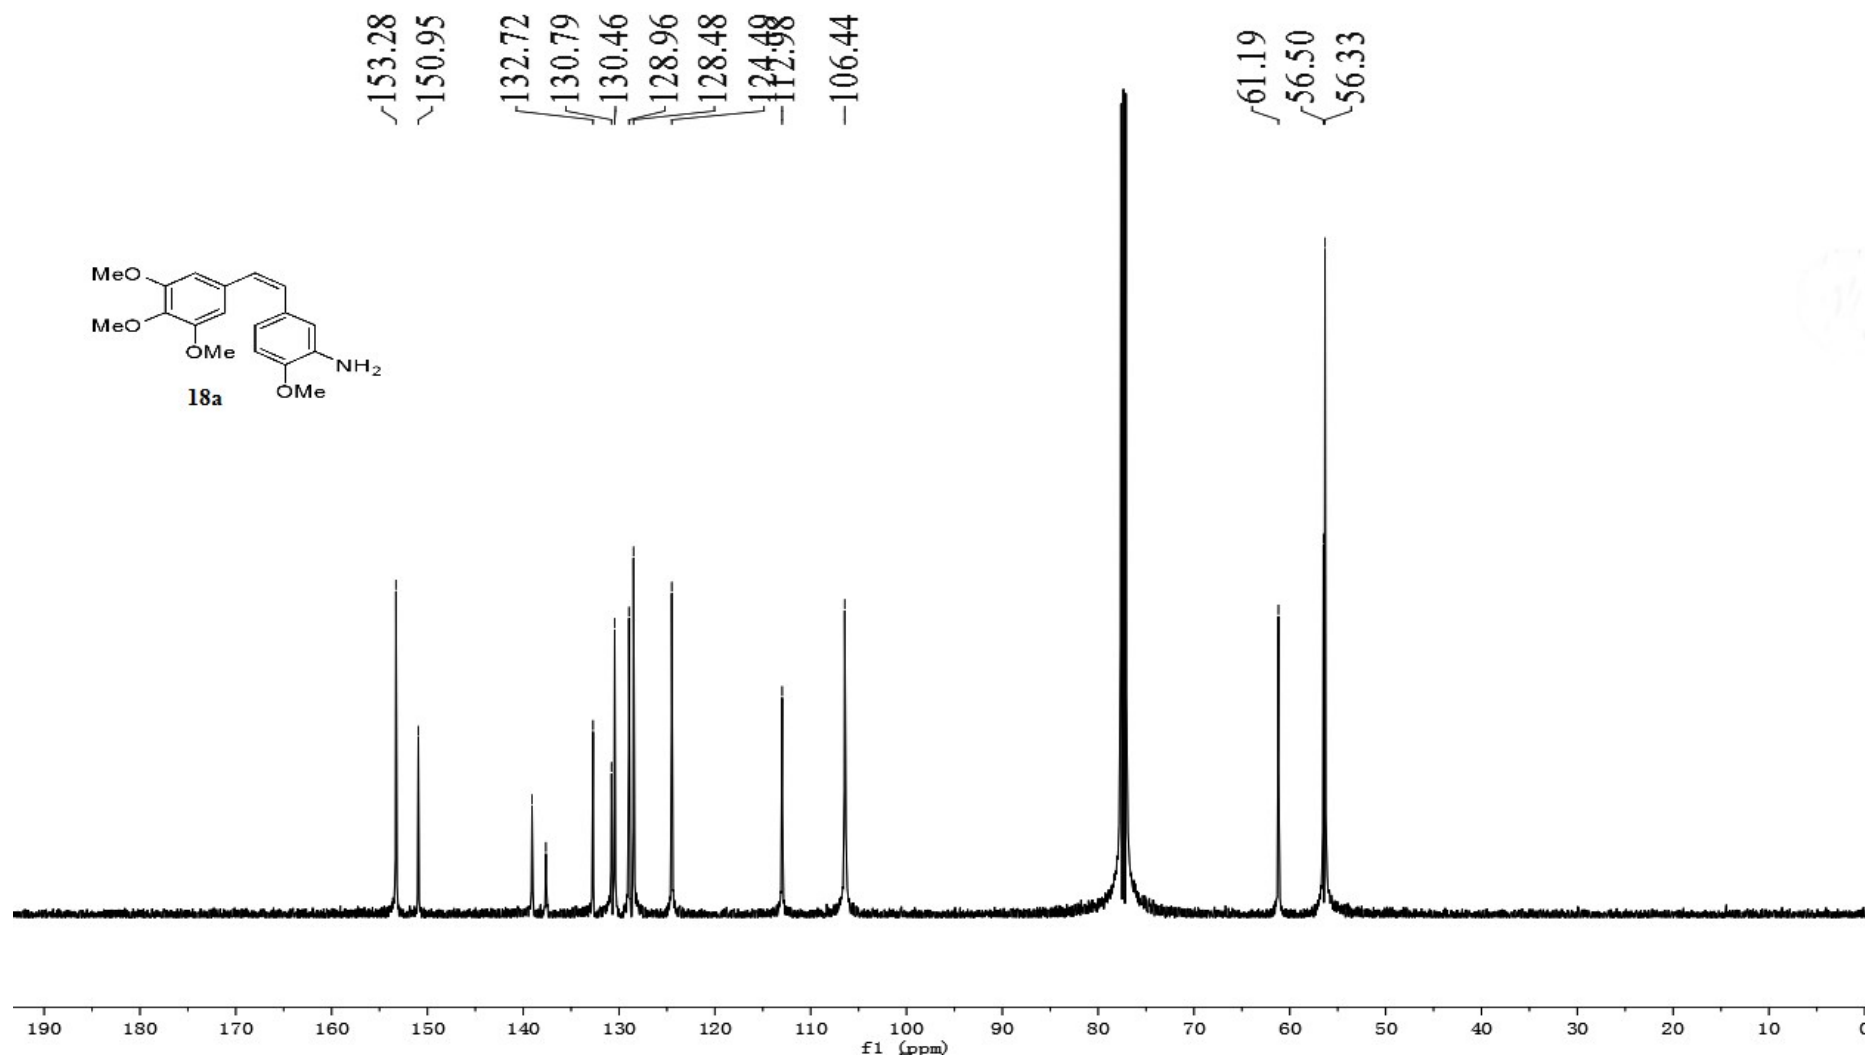



Compound 18b.  $^1\text{H}$  NMR,  $\text{CDCl}_3$ , 500 MHz

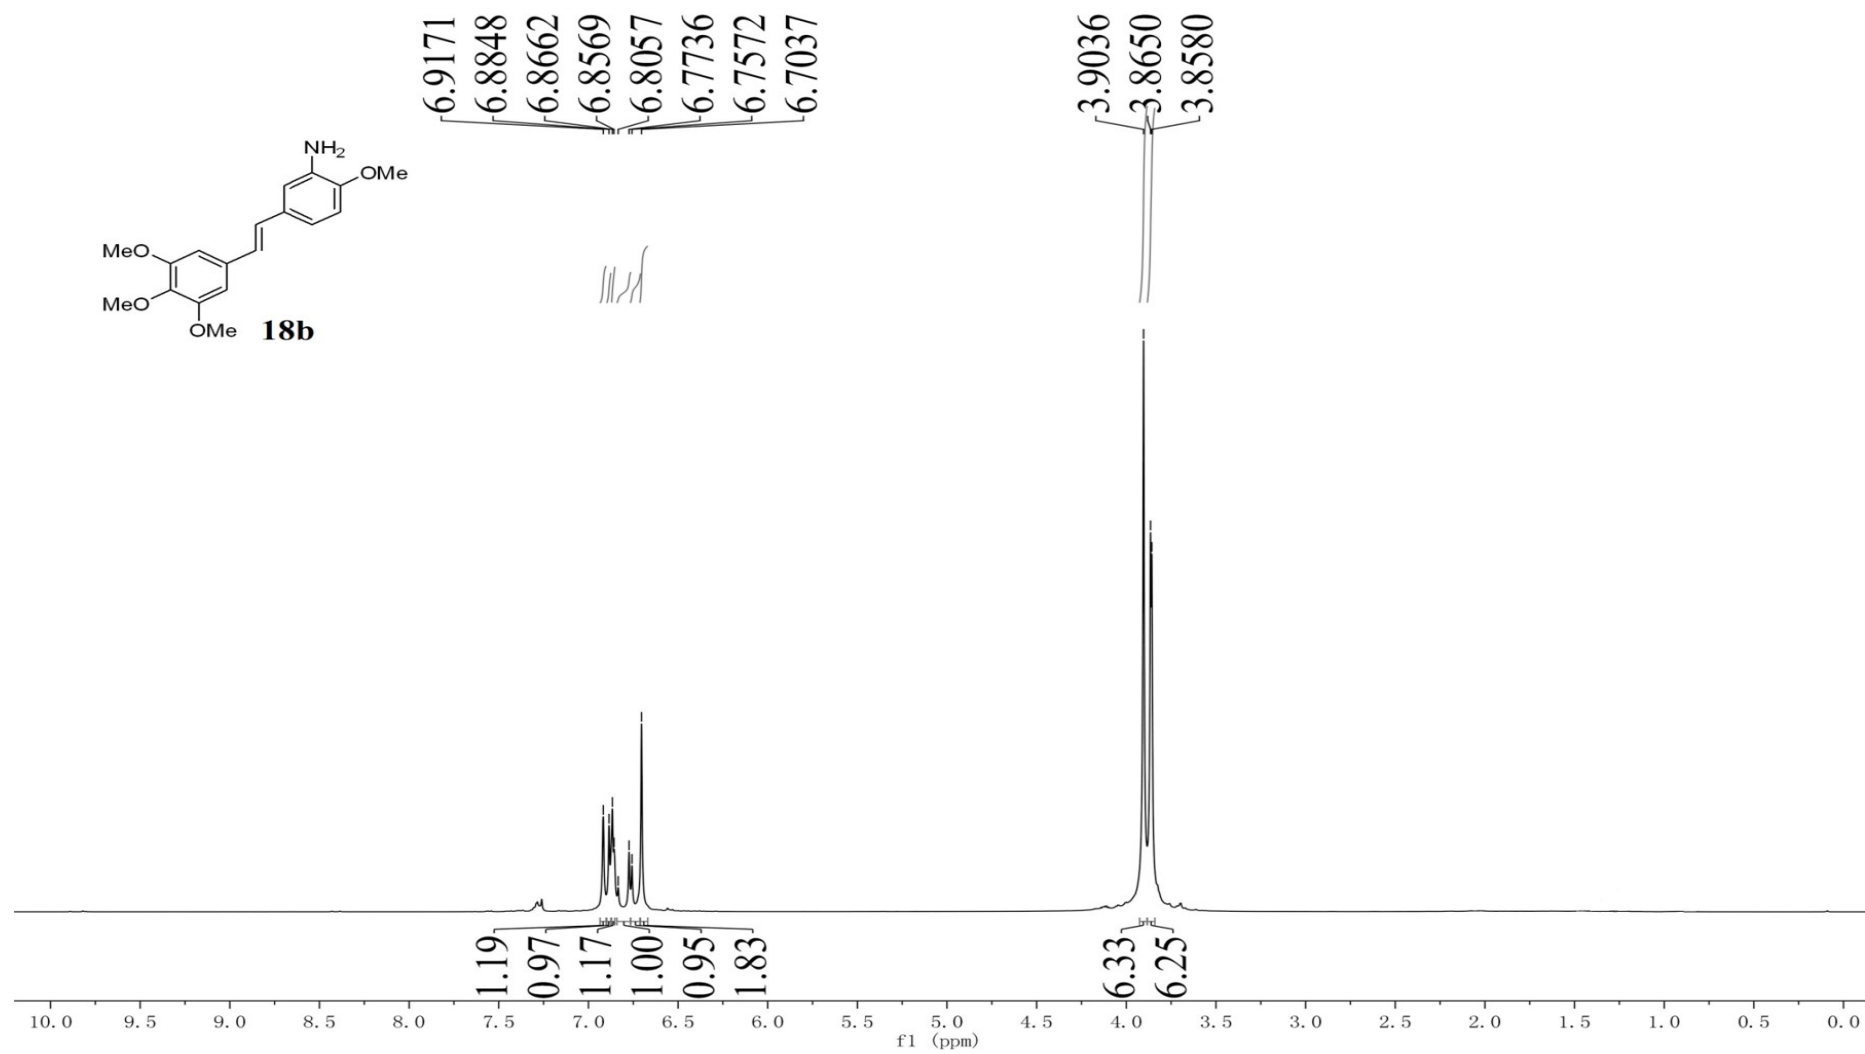

Compound 18b.  $^{13}\text{C}$  NMR,  $\text{CDCl}_3$ , 125 MHz

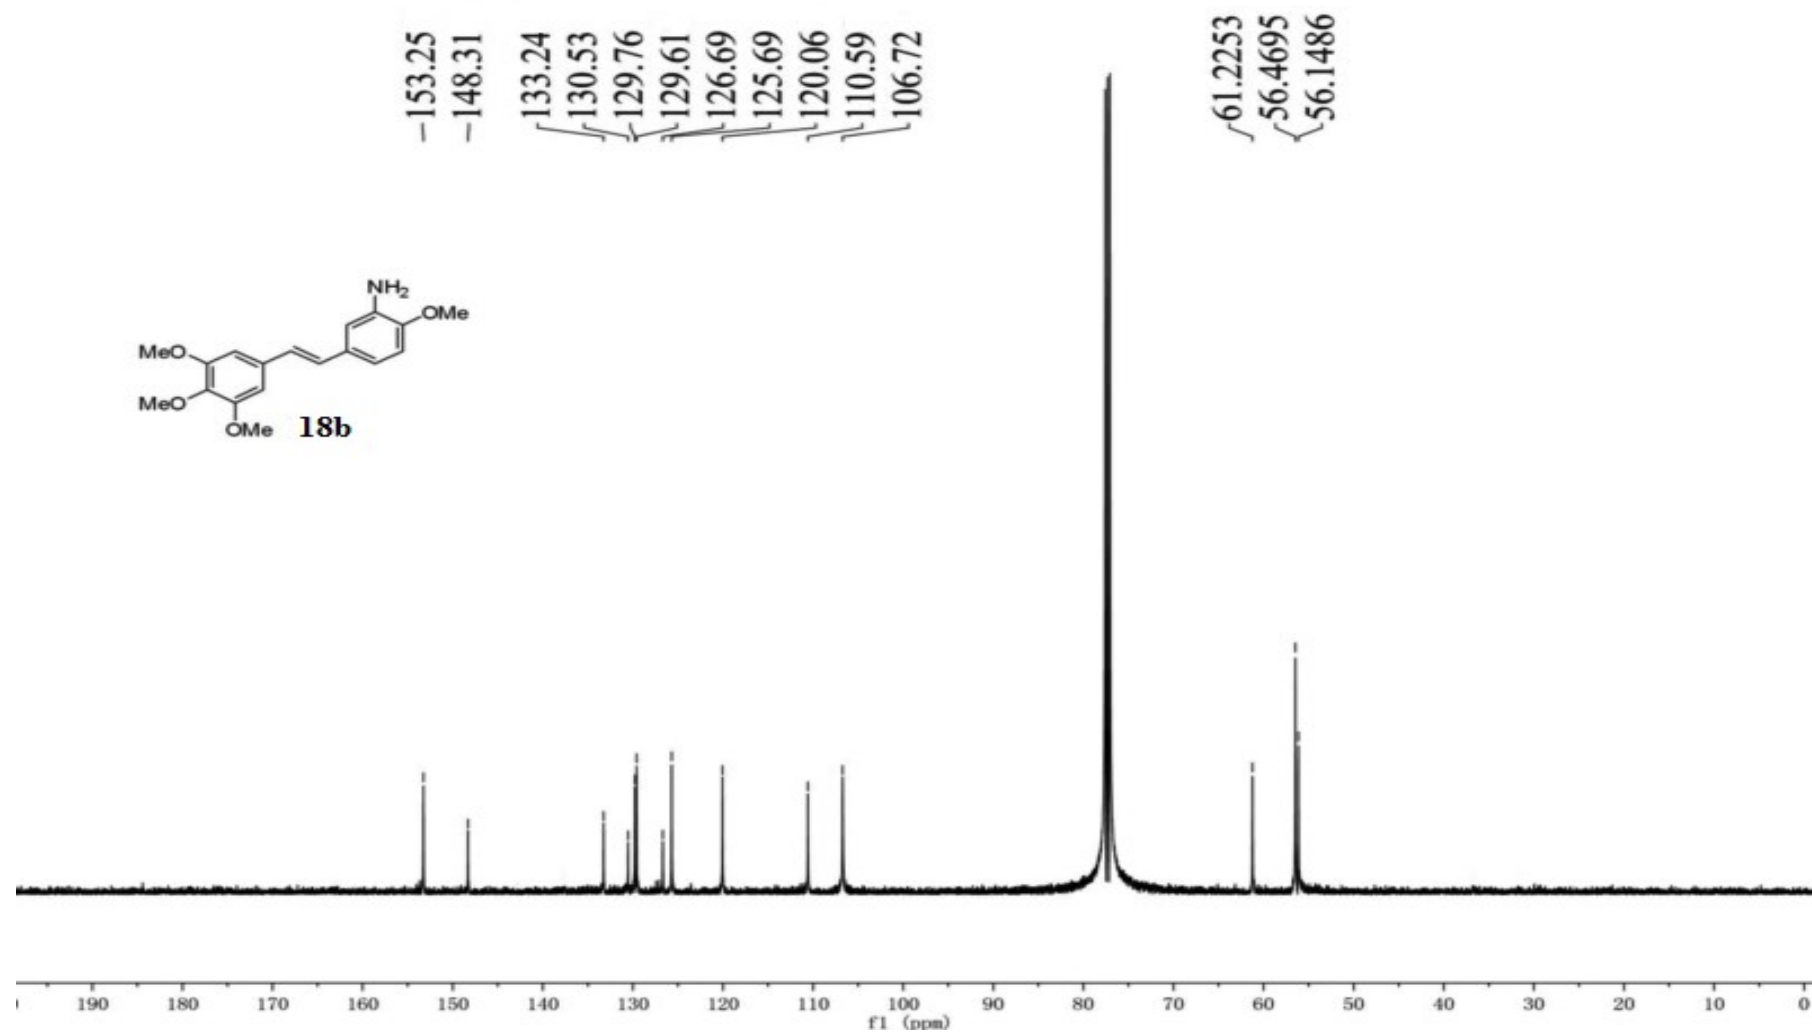

Compound 19a.  $^1\text{H}$  NMR,  $\text{CDCl}_3$ , 500 MHz

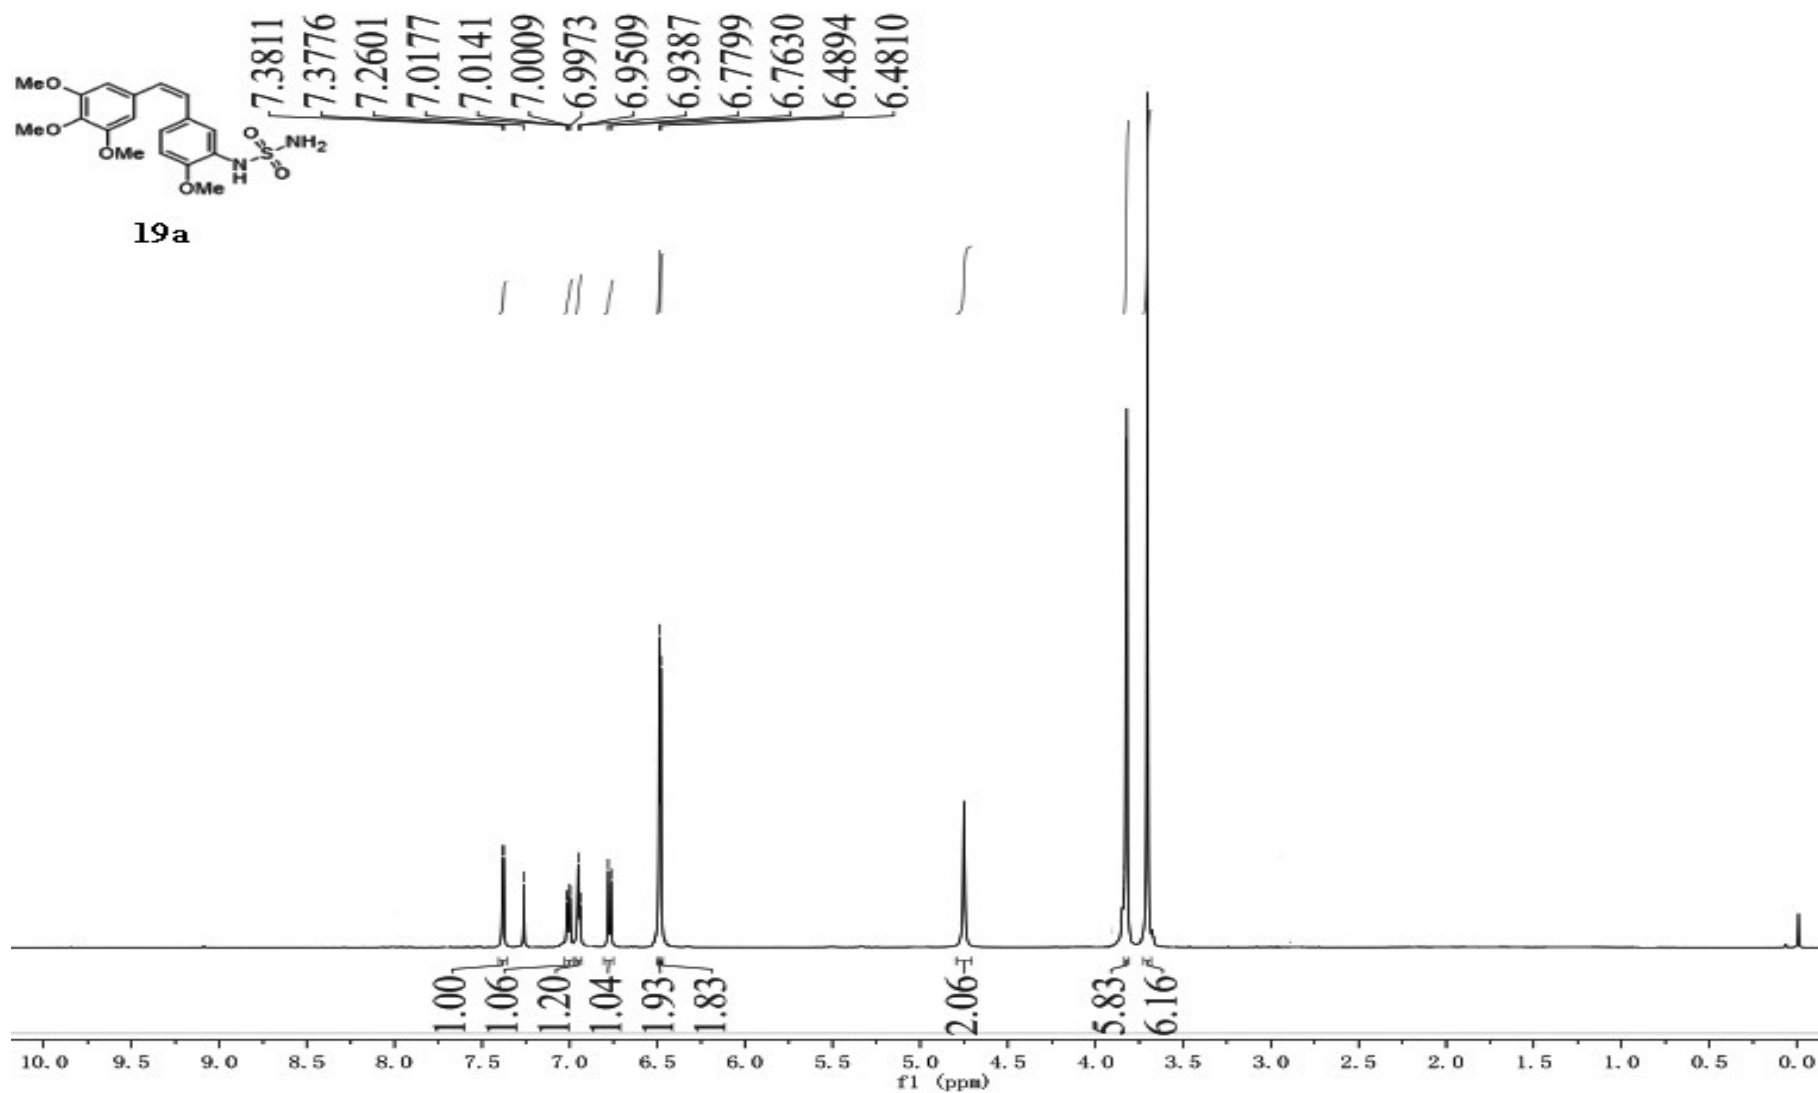

**Compound 19a.** <sup>13</sup>C NMR, CDCl<sub>3</sub>, 125 MHz

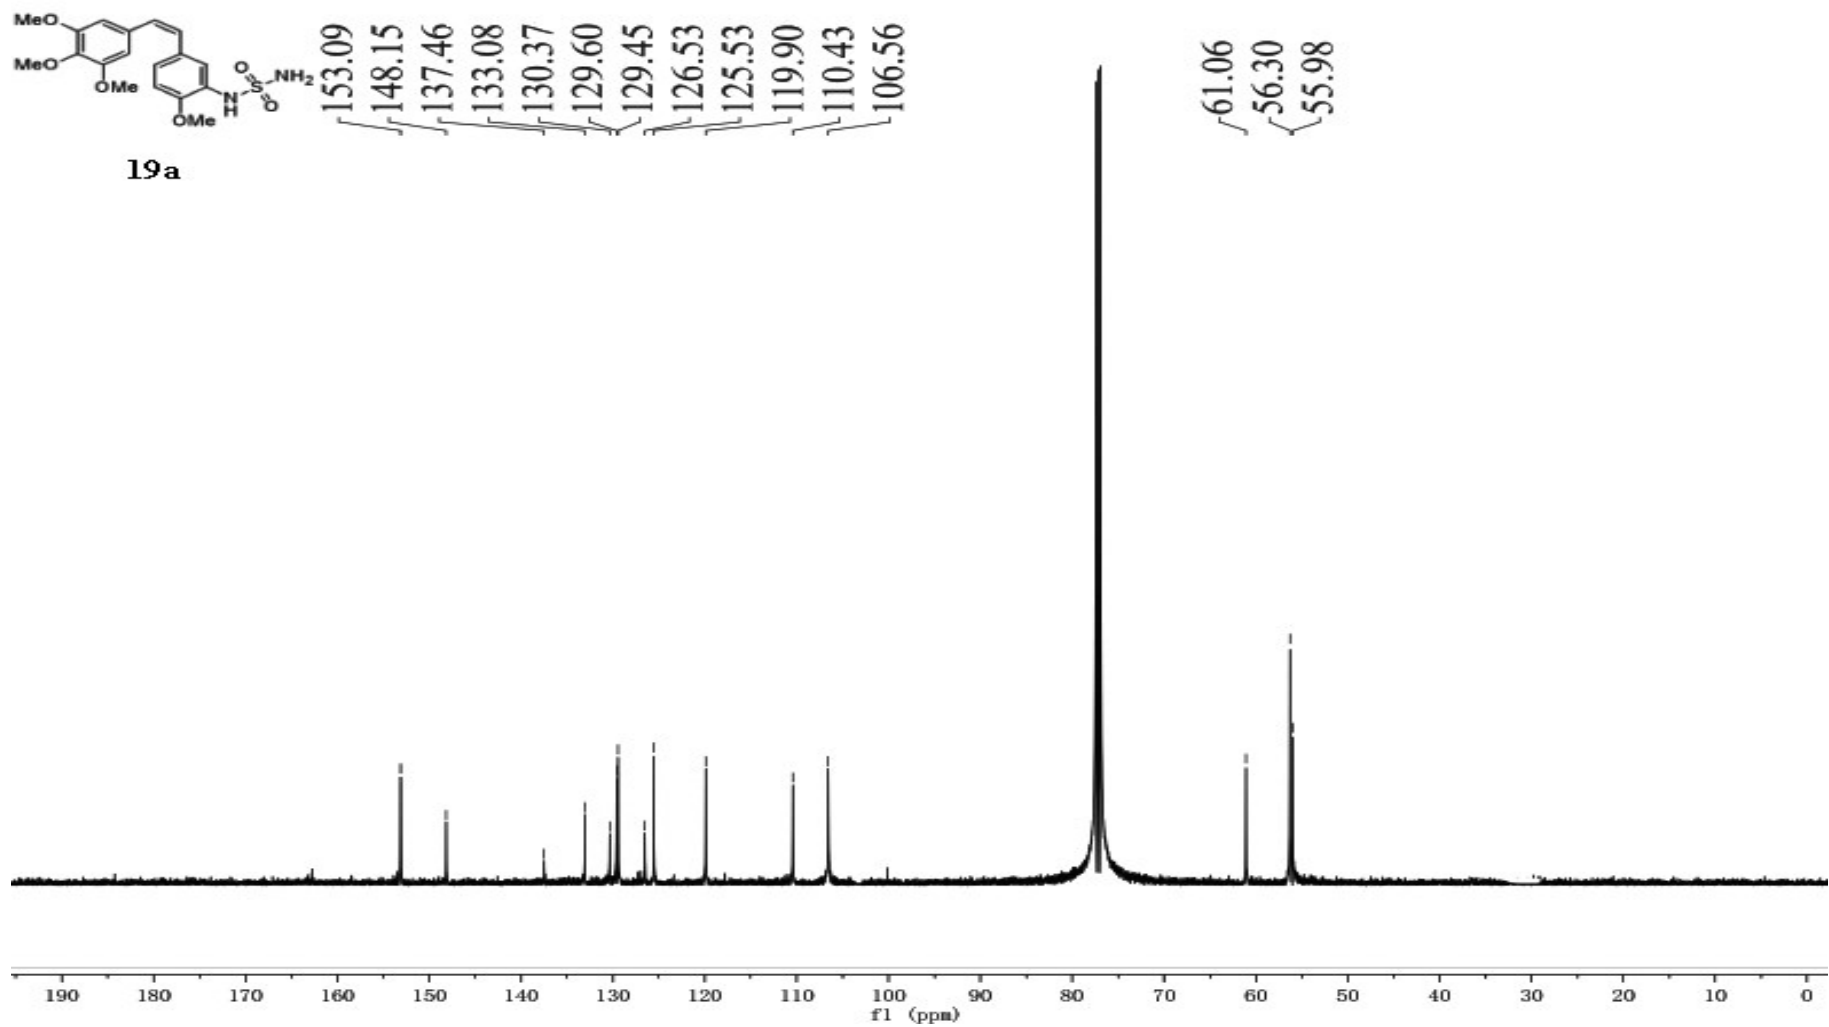

HR-MS Spectrum of Compound 19a



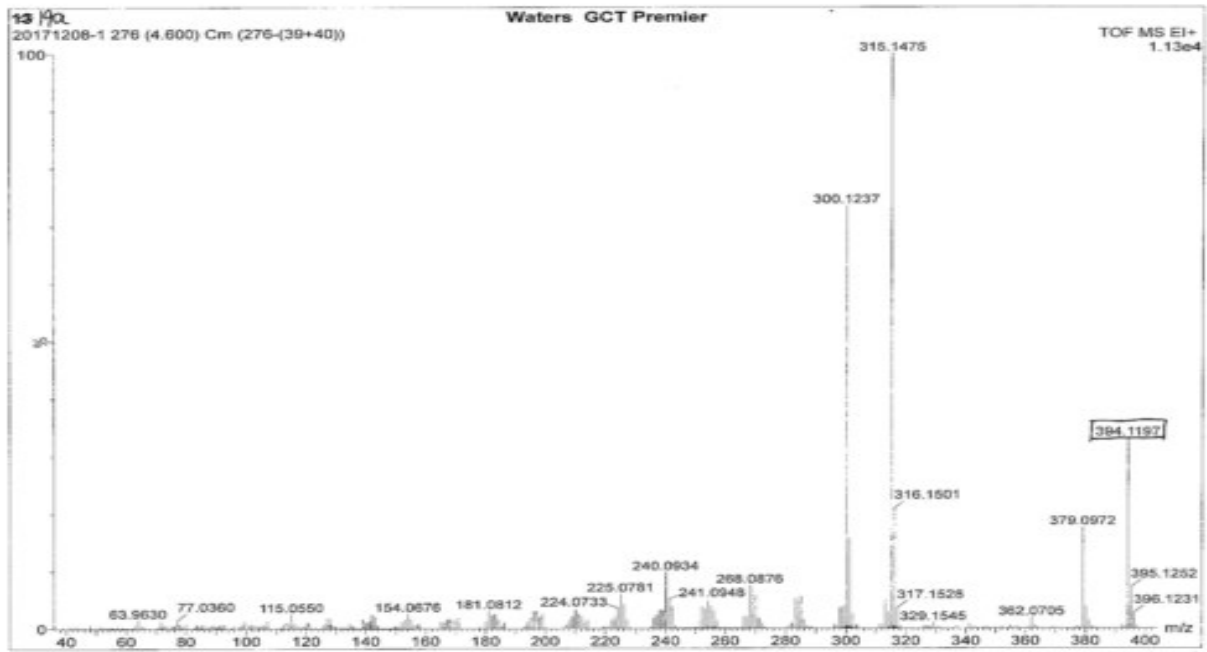

**HPLC Spectrum of Compound 19a**

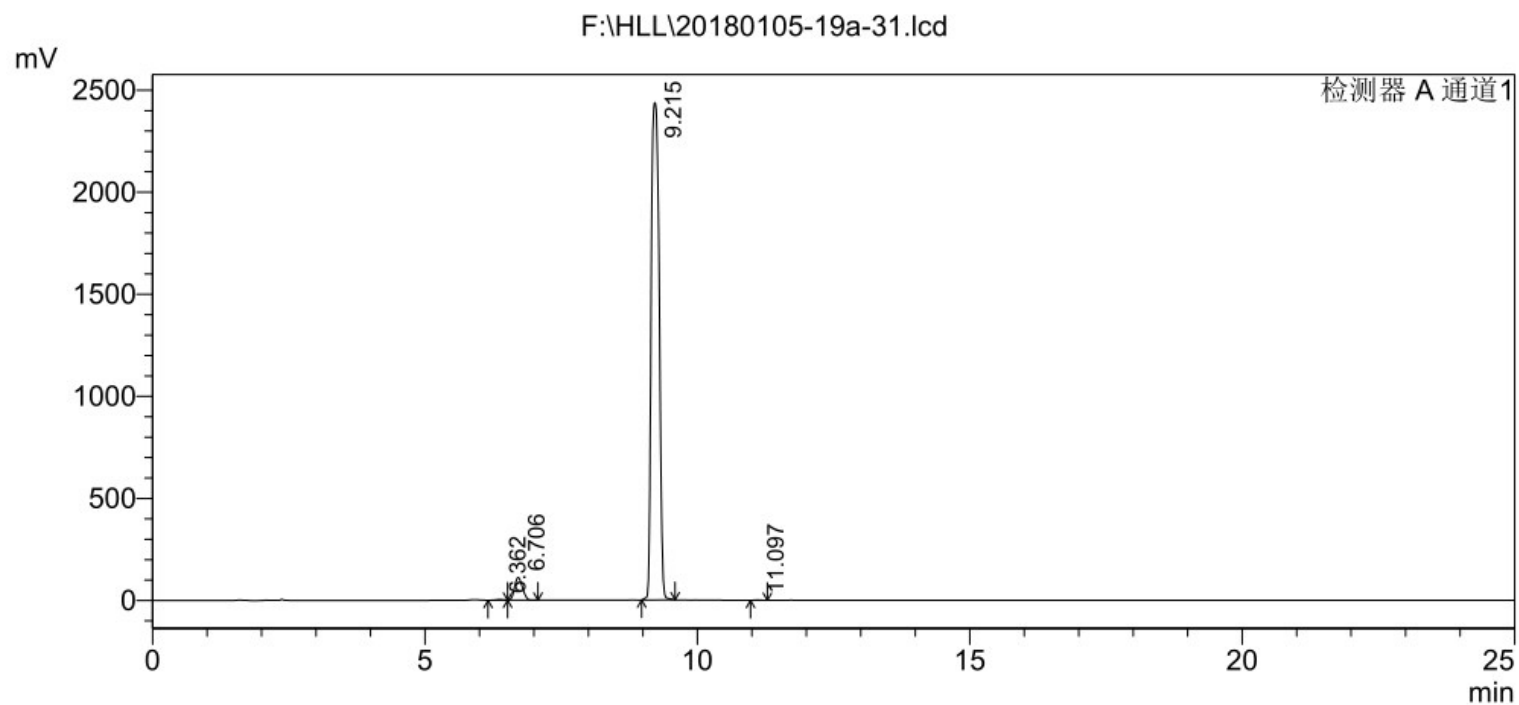

1 检测器 A 通道1/276nm

峰表

检测器 A Ch1 276nm

| 峰# | 保留时间   | 面积       | 高度      | 面积 %    | 高度 %    |
|----|--------|----------|---------|---------|---------|
| 1  | 6.362  | 35707    | 3313    | 0.138   | 0.130   |
| 2  | 6.706  | 1128465  | 111793  | 4.371   | 4.377   |
| 3  | 9.215  | 24643151 | 2437373 | 95.447  | 95.437  |
| 4  | 11.097 | 11438    | 1416    | 0.044   | 0.055   |
| 总计 |        | 25818762 | 2553896 | 100.000 | 100.000 |

**Compound 19b.**  $^1\text{H}$  NMR,  $\text{CDCl}_3$ , 500 MHz



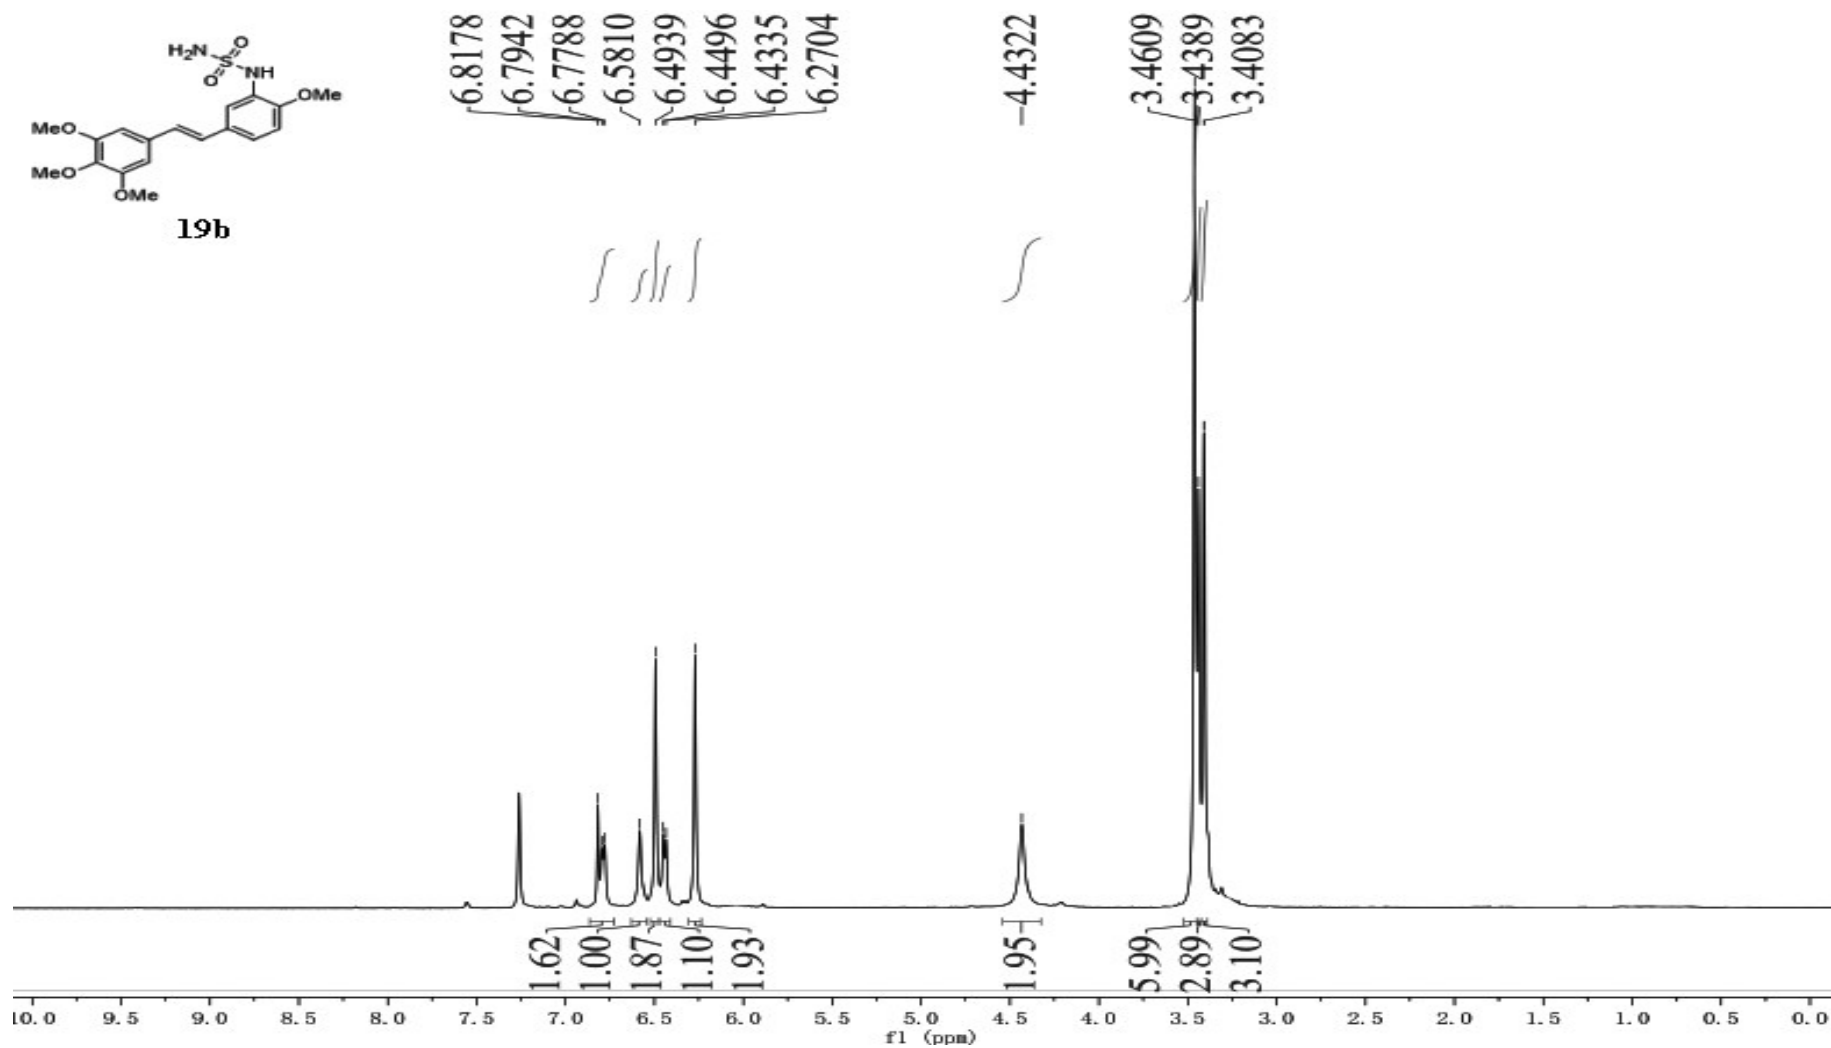

**Compound 19b.** <sup>13</sup>C NMR, CDCl<sub>3</sub>, 125 MHz

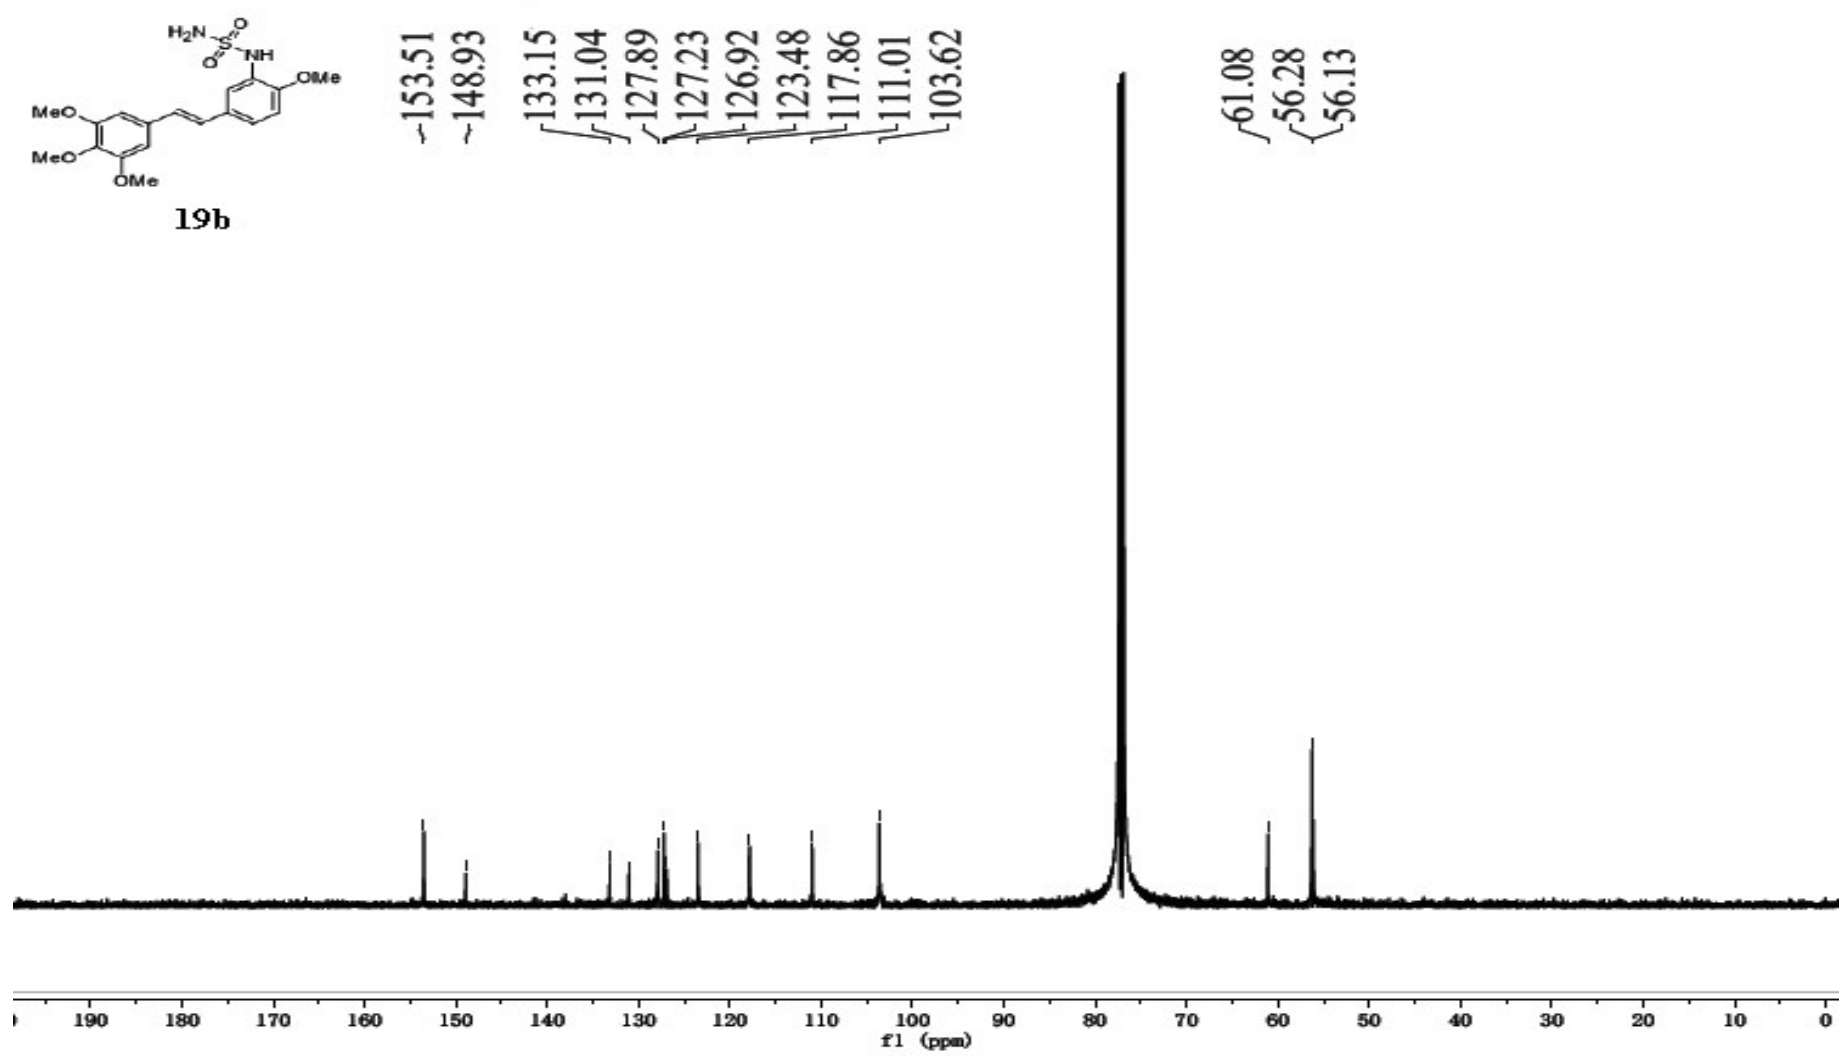

**HR-MS Spectrum of Compound 19b**

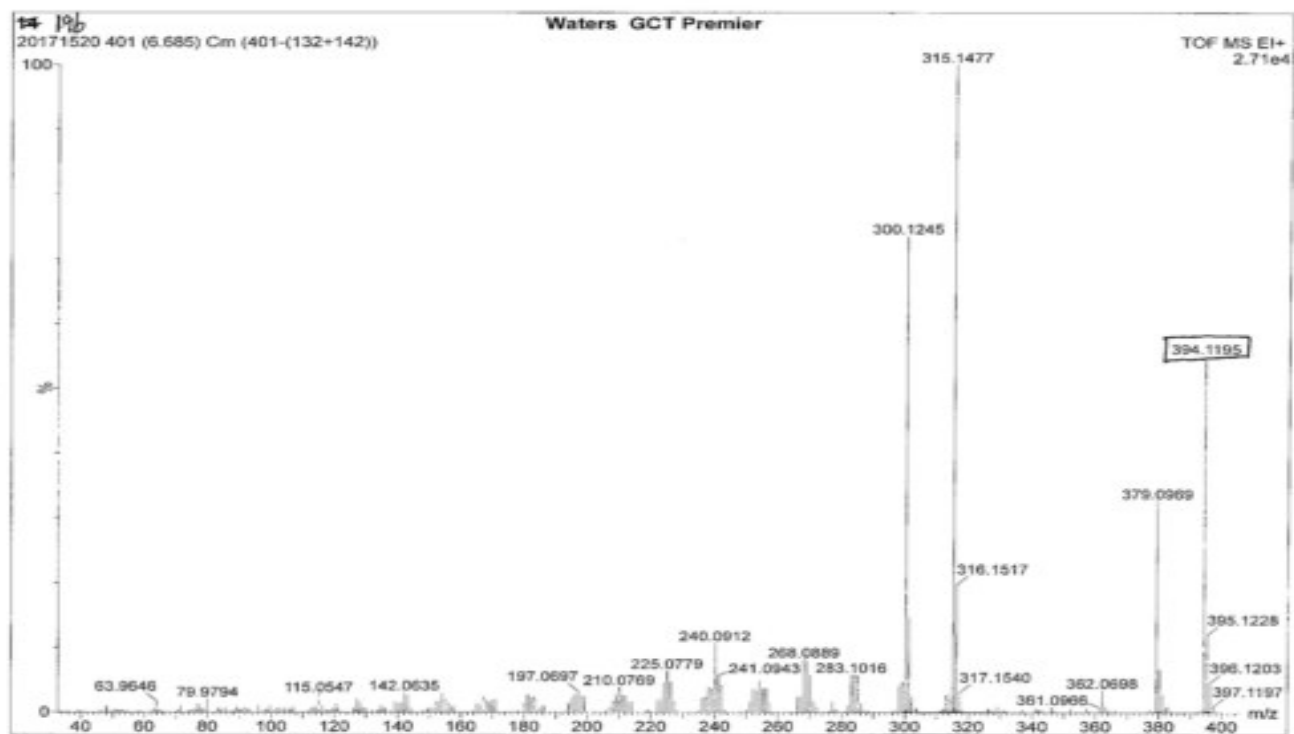

# HPLC Spectrum of Compound 19b

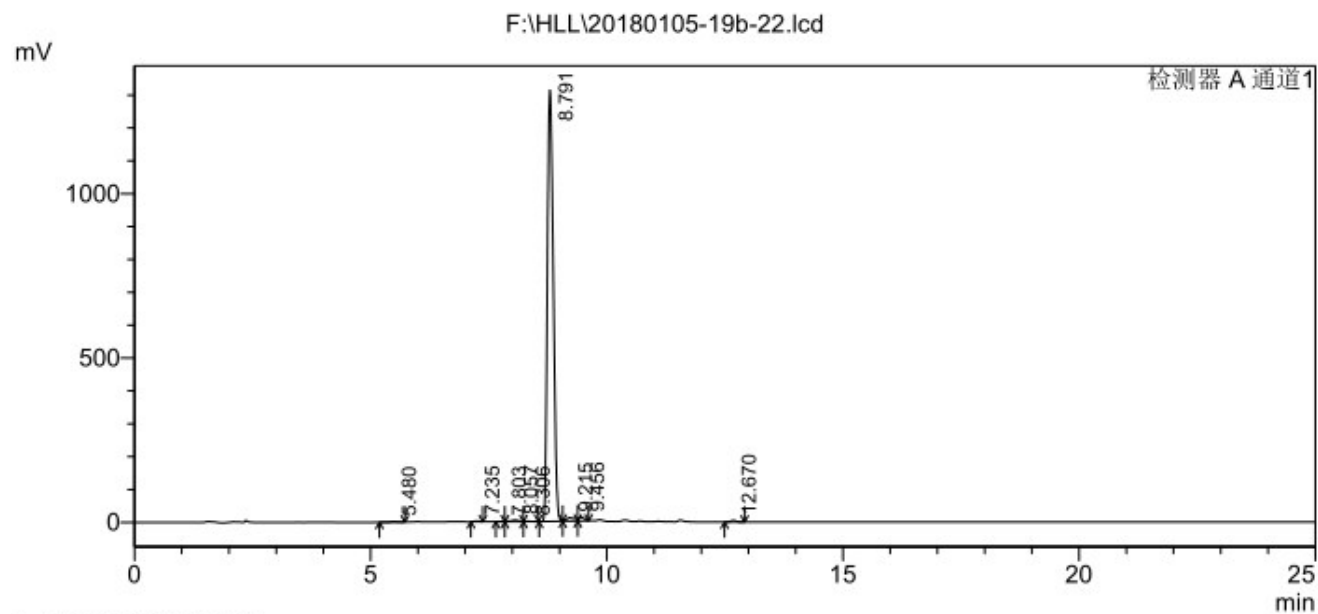

1 检测器 A 通道1/276nm

峰表

检测器 A Ch1 276nm

| 峰# | 保留时间   | 面积       | 高度      | 面积 %    | 高度 %    |
|----|--------|----------|---------|---------|---------|
| 1  | 5.480  | 16005    | 1114    | 0.135   | 0.083   |
| 2  | 7.235  | 16719    | 2121    | 0.141   | 0.157   |
| 3  | 7.803  | 9204     | 1523    | 0.077   | 0.113   |
| 4  | 8.057  | 61842    | 4631    | 0.520   | 0.343   |
| 5  | 8.306  | 13515    | 1366    | 0.114   | 0.101   |
| 6  | 8.791  | 11506218 | 1312769 | 96.838  | 97.293  |
| 7  | 9.215  | 131130   | 10057   | 1.104   | 0.745   |
| 8  | 9.456  | 85787    | 10902   | 0.722   | 0.808   |
| 9  | 12.670 | 41554    | 4810    | 0.350   | 0.356   |
| 总计 |        | 11881973 | 1349293 | 100.000 | 100.000 |

Compound 20. <sup>1</sup>H NMR, CDCl<sub>3</sub>, 500 MHz

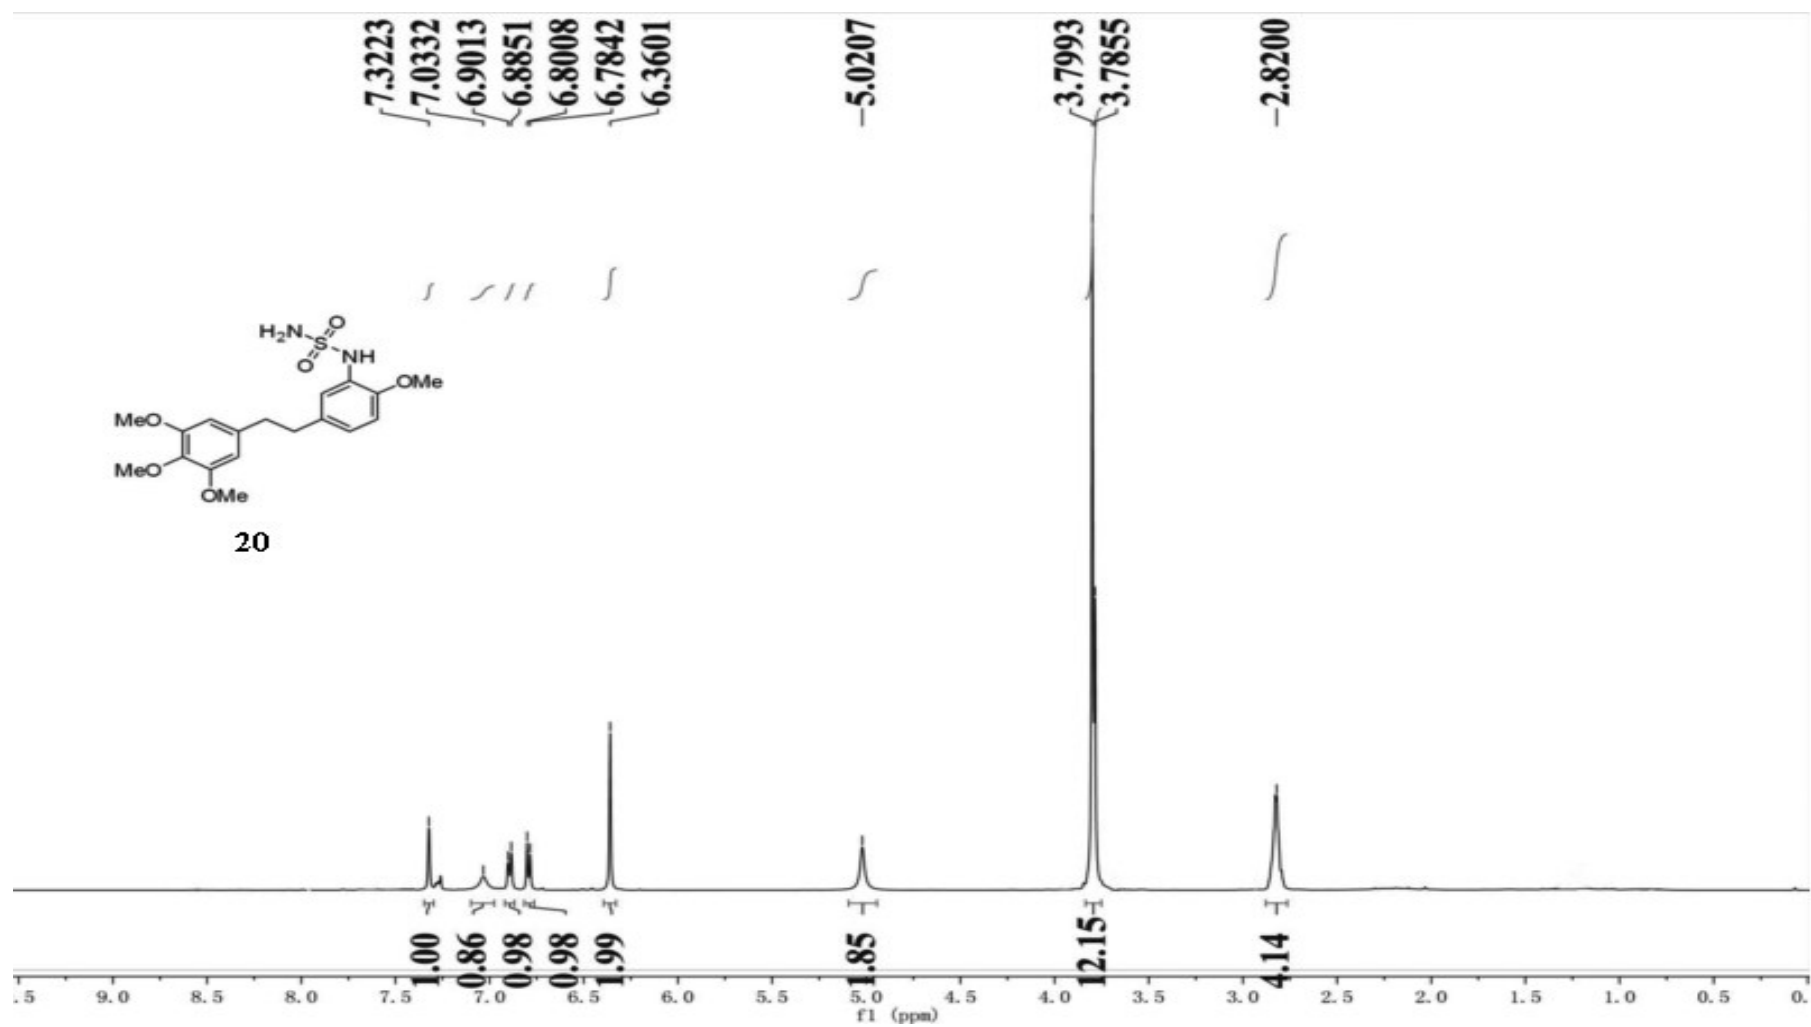

Compound 20.  $^{13}\text{C}$  NMR,  $\text{CDCl}_3$ , 125 MHz

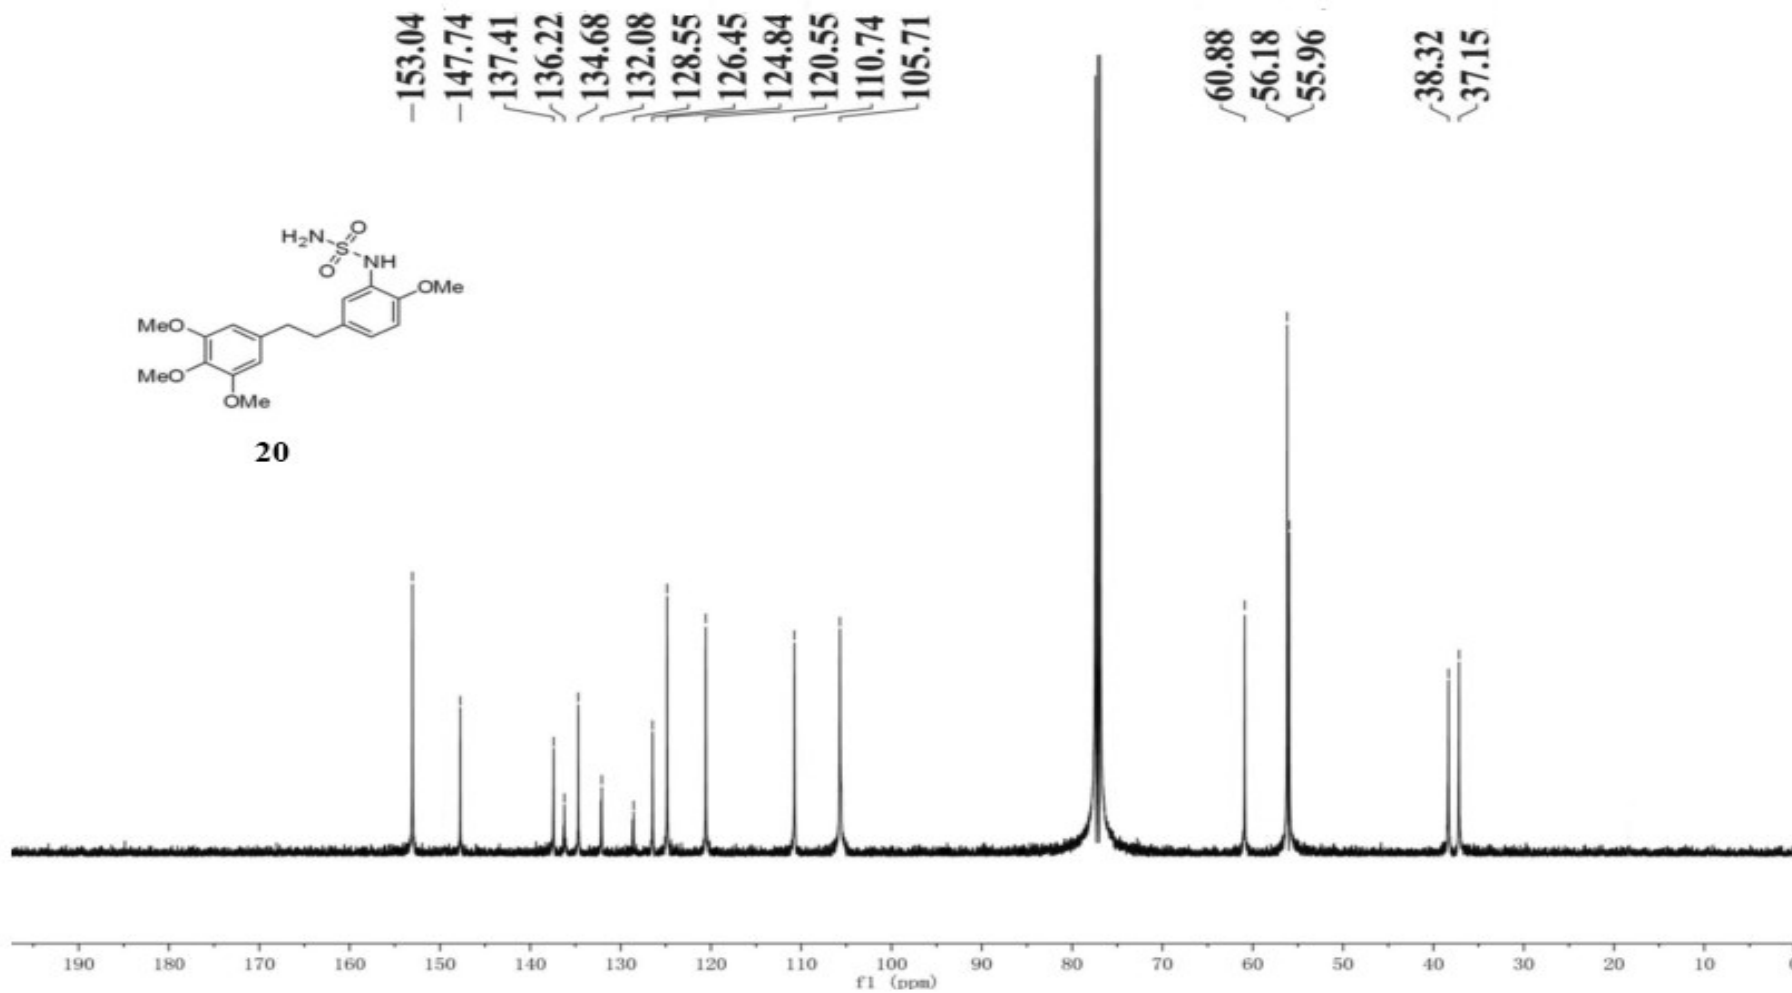

**HR-MS Spectrum of Compound 20**



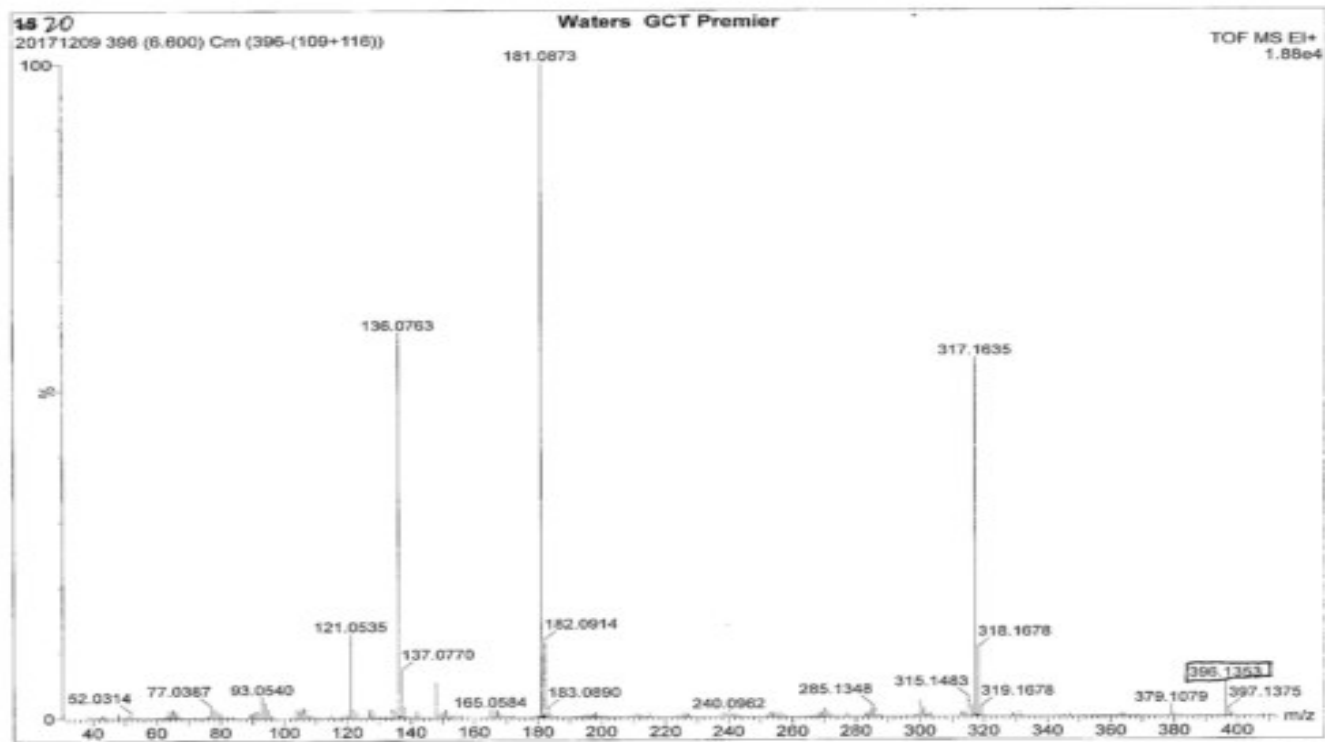

# HPLC Spectrum of Compound 20

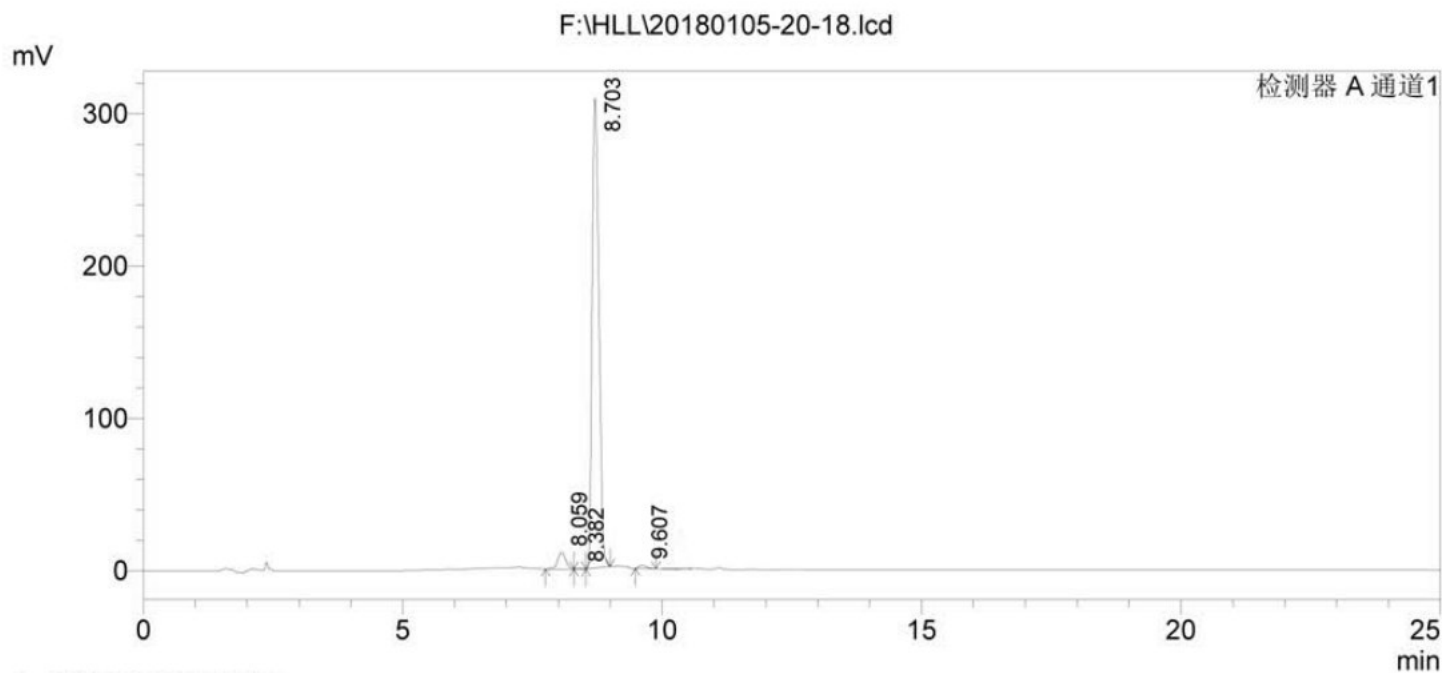

1 检测器 A 通道1/276nm

峰表

检测器 A Ch1 276nm

| 峰# | 保留时间  | 面积      | 高度     | 面积 %    | 高度 %    |
|----|-------|---------|--------|---------|---------|
| 1  | 8.059 | 116890  | 10901  | 3.980   | 3.381   |
| 2  | 8.382 | 4646    | 528    | 0.158   | 0.164   |
| 3  | 8.703 | 2794785 | 308899 | 95.164  | 95.807  |
| 4  | 9.607 | 20484   | 2090   | 0.697   | 0.648   |
| 总计 |       | 2936806 | 322418 | 100.000 | 100.000 |

The antiproliferation effect of 16a, 16i and CA-4 on six tumor cells

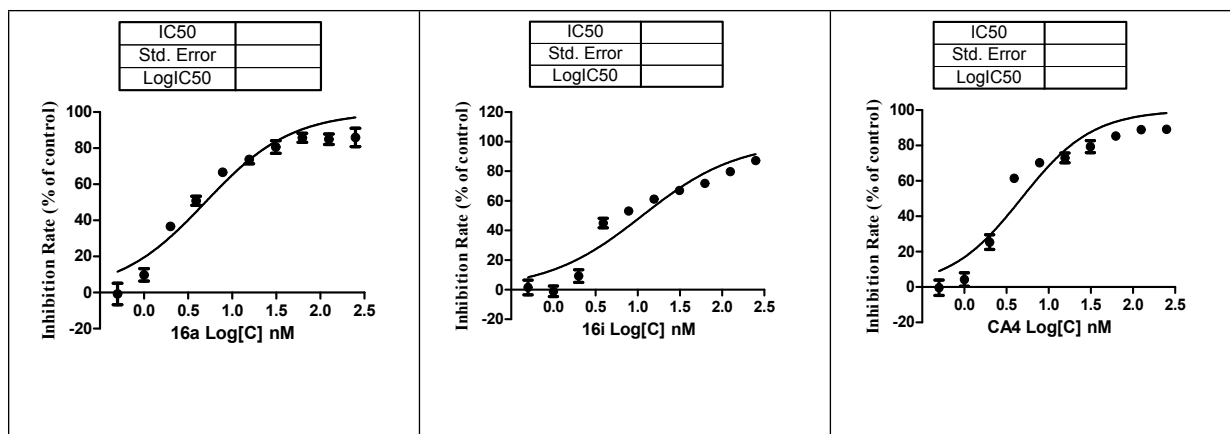

Figure 1: Antiproliferation inhibition 16a, 16i and CA4 on HCT-116 cell, Mean  $\pm$  SD, n=5.

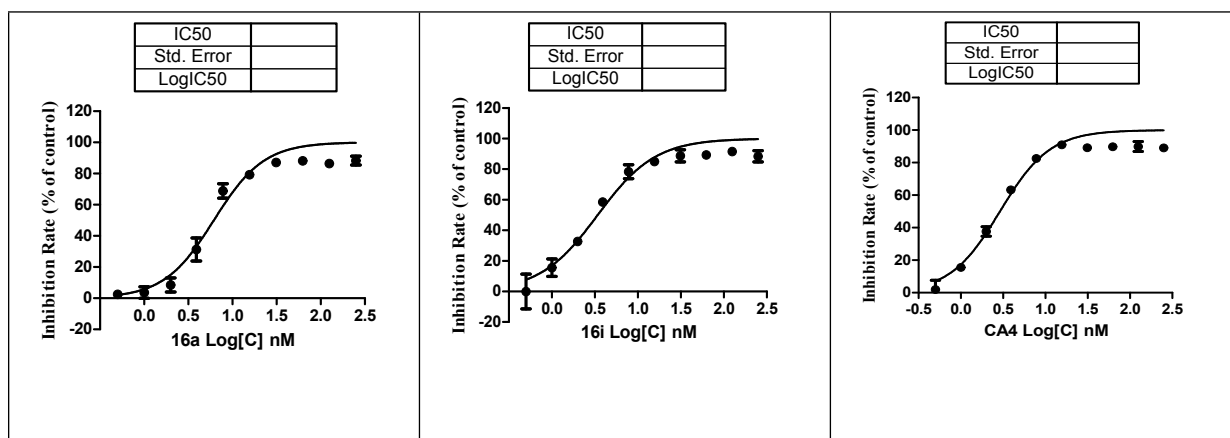

Figure 2: Antiproliferation inhibition 16a, 16i and CA4 on HeLa cell, Mean  $\pm$  SD, n=5.

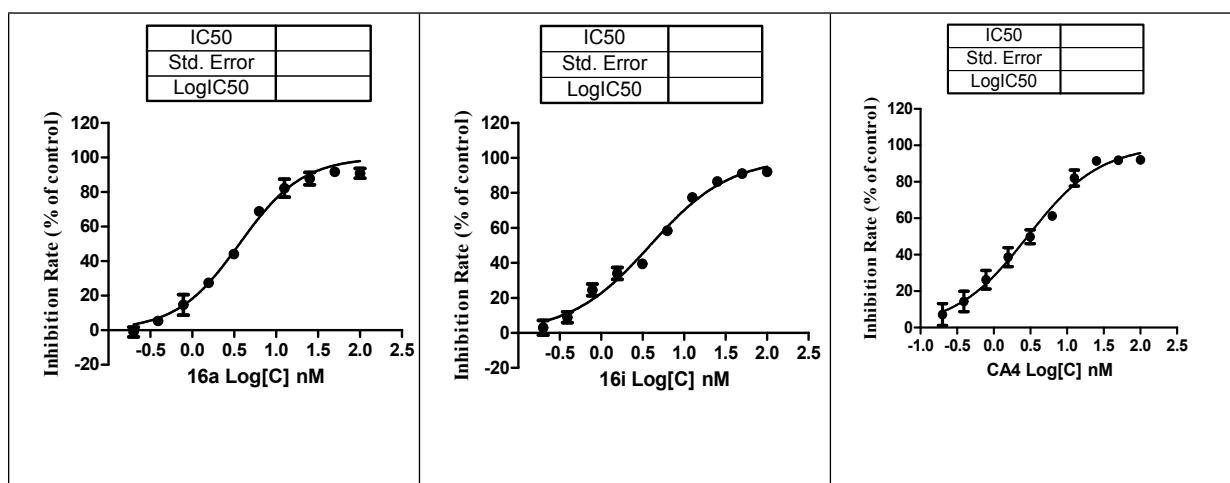

Figure 3: Antiproliferation inhibition 16a, 16i and CA4 on HeGp2 cell, Mean  $\pm$  SD, n=5.

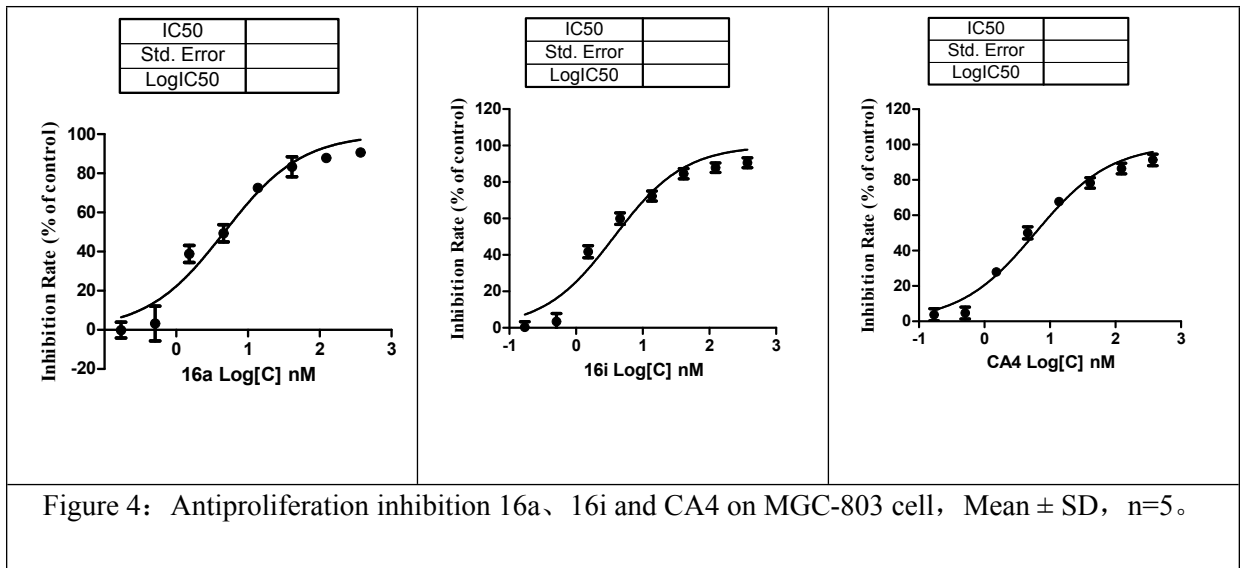

Figure 4: Antiproliferation inhibition 16a, 16i and CA4 on MGC-803 cell, Mean  $\pm$  SD, n=5.

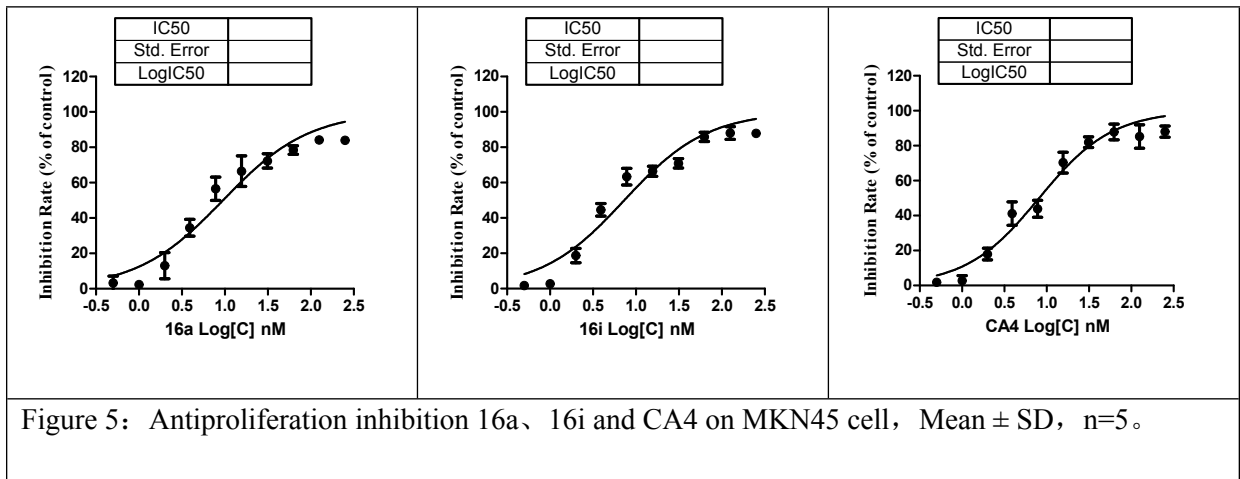

Figure 5: Antiproliferation inhibition 16a, 16i and CA4 on MKN45 cell, Mean  $\pm$  SD, n=5.

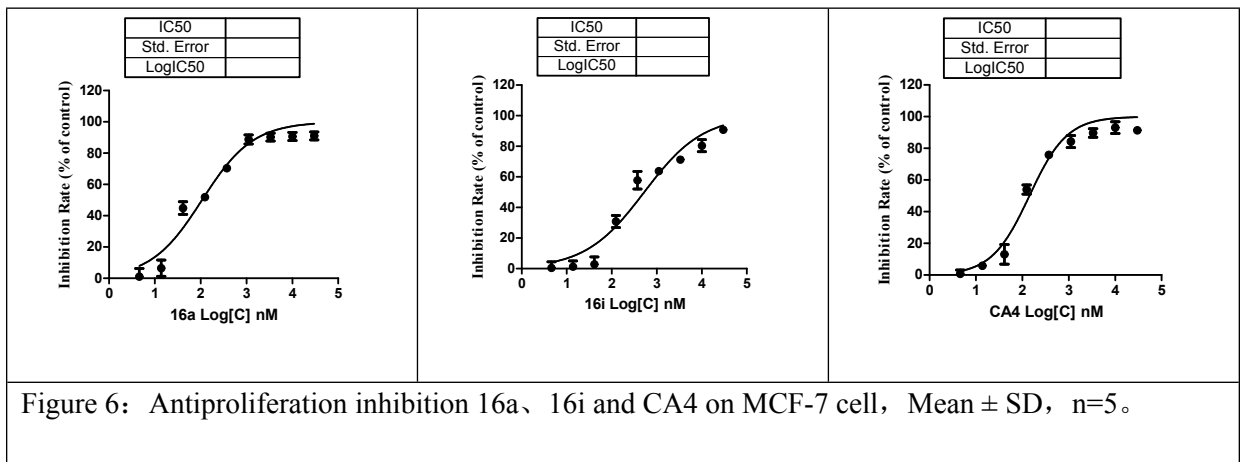

Figure 6: Antiproliferation inhibition 16a, 16i and CA4 on MCF-7 cell, Mean  $\pm$  SD, n=5.
